# Supplementary material for: Dual Coordination of Post Translational Modifications in Human Protein Networks
Source: PLoS Comput Biol. 2013 Mar 7;9(3):e1002933. doi: 10.1371/journal.pcbi.1002933 (PMC3591266; doi:10.1371/journal.pcbi.1002933)
Supplement: Dataset S1 — Collated post translation modification dataset. (XLSX) [file pcbi.1002933.s001.xlsx]

## Sheet: All_13mers
Entrez Gene ID	13mer	Pos	PTM	Residue	Protein Length	RefSeq
2	KKLSFYYLIMAKG	497	pY	Y	1474	NP_000005
2	MGLKAFTNSKIRK	679	pS_pT	T	1474	NP_000005
2	CPQLQQYEMHGPE	695	pY	Y	1474	NP_000005
2	GLRVGFYESDVMG	708	pY	Y	1474	NP_000005
2	LAGNQDKRKEVLK	1162	Acc	K	1474	NP_000005
9	STPAKKYSTGMIH	101	pY	Y	290	NP_000653
10	YFERIGYKNSRNK	12	pY	Y	290	NP_000006
10	TYRKFNYKDNTDL	246	pY	Y	290	NP_000006
12	SRFYLSKKKWVMV	235	Acc	K	423	NP_001076
12	RFYLSKKKWVMVP	236	Acc	K	423	NP_001076
12	FYLSKKKWVMVPM	237	Acc	K	423	NP_001076
12	NIFFMSKVTNPKQ	416	Acc	K	423	NP_001076
12	SKVTNPKQA%%%%	421	Acc	K	423	NP_001076
13	PERIGISGDSAGG	186	pS_pT	S	399	NP_001077
13	PLTYVITCQYDLL	339	pS_pT	T	399	NP_001077
13	YVITCQYDLLRDD	342	pY	Y	399	NP_001077
13	RDDGLMYVTRLRN	352	pY	Y	399	NP_001077
14	TGGEDDKAFVWRL	115	Ub	K	434	NP_001078
14	IRIWDLKQGSPIH	245	Ub	K	434	NP_001078
15	SCQRRHTLPASEF	31	pS_pT	T	207	NP_001079
15	PFLRRNSGC%%%%	205	pS_pT	S	207	NP_001079
16	RFIDFFKRNEHTY	19	Acc	K	968	NP_001596
16	RFIDFFKRNEHTY	19	Ub	K	968	NP_001596
16	CIRAGGKHNDLDD	81	Ub	K	968	NP_001596
16	EEVQFLKTLSRGR	384	Ub	K	968	NP_001596
16	LDRKIQSLGDSKT	399	pS_pT	S	968	NP_001596
16	EQGGQIYDEGYLV	543	pY	Y	968	NP_001596
16	VKVDDSSEDKTEF	555	pS_pT	S	968	NP_001596
16	KTEFTVKNAQVRG	564	Ub	K	968	NP_001596
16	YVLHIGTIYGDLK	578	pS_pT	T	968	NP_001596
16	LHIGTIYGDLKVG	580	pY	Y	968	NP_001596
16	LGEADQKGSLVAP	625	Ub	K	968	NP_001596
16	CPLAAAKAIQGLR	677	Ub	K	968	NP_001596
16	AVFDETYPDPVRV	690	pY	Y	968	NP_001596
16	TEEAIAKGIRRIV	747	Ub	K	968	NP_001596
16	TGAEAQKALRKAE	762	Ub	K	968	NP_001596
16	ELRETLKSLKKVM	820	Ub	K	968	NP_001596
16	ALNEALKLFKMHS	876	Acc	K	968	NP_001596
16	ALNEALKLFKMHS	876	Ub	K	968	NP_001596
16	SGLMDGKGGGKDV	930	Ub	K	968	NP_001596
16	DVSAQATGKNVGC	941	pS_pT	T	968	NP_001596
19	GMQRKLSVALAFV	1042	pS_pT	S	2261	NP_005493
19	VESSLSSCRNSSS	1141	pS_pT	S	2261	NP_005493
19	SCRNSSSTVSYLK	1147	pS_pT	S	2261	NP_005493
19	IGHELTYVLPYEA	1206	pY	Y	2261	NP_005493
19	SYGISETTLEEIF	1242	pS_pT	T	2261	NP_005493
19	YGISETTLEEIFL	1243	pS_pT	T	2261	NP_005493
19	LKVAEESGVDAET	1255	pS_pT	S	2261	NP_005493
19	GNKRKLSTAMALI	2054	pS_pT	S	2261	NP_005493
20	ELGRILTVPESQK	282	pS_pT	T	2466	NP_997698
20	GLFPPTSGSATIY	1076	pS_pT	S	2466	NP_997698
20	FPPTSGSATIYGH	1078	pS_pT	S	2466	NP_997698
20	PTSGSATIYGHDI	1080	pS_pT	T	2466	NP_997698
20	SGSATIYGHDIRT	1082	pY	Y	2466	NP_997698
20	YGHDIRTEMDEIR	1088	pS_pT	T	2466	NP_997698
20	YRLTLVKRPAEPG	1253	Ub	K	2466	NP_997698
20	VSEEDQSLENSEA	1358	pS_pT	S	2466	NP_997698
20	DQSLENSEADVKE	1362	pS_pT	S	2466	NP_997698
20	NSEADVKESRKDV	1367	Ub	K	2466	NP_997698
20	RFRLHRYGAITFG	1725	pY	Y	2466	NP_997698
20	RMPVSTKPVEDDV	2056	Ub	K	2466	NP_997698
20	VKIENLTKVYKSR	2087	pS_pT	T	2466	NP_997698
20	KLELTKYADKPAG	2209	pY	Y	2466	NP_997698
20	DKPAGTYSGGNKR	2217	pY	Y	2466	NP_997698
20	EPEDLDTEDEGLI	2443	pS_pT	T	2466	NP_997698
21	MAVSSFYENYETR	1265	pY	Y	1704	NP_001080
21	SSFYENYETRRYC	1268	pY	Y	1704	NP_001080
21	RTLTELYTRMPVL	1349	pY	Y	1704	NP_001080
21	HTPLIIKELSKVY	1384	Ub	K	1704	NP_001080
21	VFGILEKAKEKYG	1668	Ub	K	1704	NP_001080
22	RNAVFGKVAQNSI	217	Acc	K	753	NP_004290
22	QTGALSKAIDRGT	252	Acc	K	753	NP_004290
22	RGTRGISFVLSAL	262	pS_pT	S	753	NP_004290
22	GISFVLSALVFNL	266	pS_pT	S	753	NP_004290
22	NYETVKYFNNERY	346	pY	Y	753	NP_004290
22	RYEAQRYDGFLKT	357	pY	Y	753	NP_004290
23	WIGDGESTSPSDK	20	pS_pT	S	845	NP_001020262
23	GDGESTSPSDKVV	22	pS_pT	S	845	NP_001020262
23	GESTSPSDKVVKK	24	pS_pT	S	845	NP_001020262
23	KDKKIKKTFFEEL	39	Ub	K	845	NP_001020262
23	ERLKKLSVPTSDE	105	pS_pT	S	845	NP_001020262
23	KKLSVPTSDEEDE	108	pS_pT	T	845	NP_001020262
23	KLSVPTSDEEDEV	109	pS_pT	S	845	NP_001020262
23	ALIQDQSEEEEEE	140	pS_pT	S	845	NP_001020262
23	RINKAVSEEQQPA	166	pS_pT	S	845	NP_001020262
23	KKAEQGSEEEGEG	228	pS_pT	S	845	NP_001020262
23	LKKQMEYERQVAS	267	pY	Y	845	NP_001020262
23	RQVASLKAANAAE	275	Ub	K	845	NP_001020262
23	YEELRATGAAAAE	422	pS_pT	T	845	NP_001020262
23	QNRPTQKFSGGWR	451	Ub	K	845	NP_001020262
23	STKQAEKQTKEAL	573	Ub	K	845	NP_001020262
23	KEALTRKQQKCRR	582	Ub	K	845	NP_001020262
23	KNQDEESQEAPEL	595	pS_pT	S	845	NP_001020262
23	TGKLTPTHGEMRK	678	pS_pT	T	845	NP_001020262
23	RKNHRLKIGFFNQ	689	Ub	K	845	NP_001020262
24	LMGKILYTPDSPA	400	pY	Y	2273	NP_000341
24	EKTEPLTEETEDP	901	pS_pT	T	2273	NP_000341
24	CSSKGFSTTCPAH	1185	pS_pT	S	2273	NP_000341
24	REKAGQTPQDSNV	1313	pS_pT	T	2273	NP_000341
24	GQTPQDSNVCSPG	1317	pS_pT	S	2273	NP_000341
25	EAARWNSKENLLA	69	pS_pT	S	1149	NP_009297
25	NLFVALYDFVASG	89	pY	Y	1149	NP_009297
25	KLRVLGYNHNGEW	112	pY	Y	1149	NP_009297
25	GWVPSNYITPVNS	134	pY	Y	1149	NP_009297
25	LEKHSWYHGPVSR	147	pY	Y	1149	NP_009297
25	SRNAAEYLLSSGI	158	pY	Y	1149	NP_009297
25	RYEGRVYHYRINT	191	pY	Y	1149	NP_009297
25	ASDGKLYVSSESR	204	pY	Y	1149	NP_009297
25	LITTLHYPAPKRN	234	pY	Y	1149	NP_009297
25	RNKPTVYGVSPNY	245	pY	Y	1149	NP_009297
25	YGVSPNYDKWEME	251	pY	Y	1149	NP_009297
25	KLGGGQYGEVYEG	272	pY	Y	1149	NP_009297
25	GQYGEVYEGVWKK	276	pY	Y	1149	NP_009297
25	EGVWKKYSLTVAV	283	pY	Y	1149	NP_009297
25	WKKYSLTVAVKTL	286	pS_pT	T	1149	NP_009297
25	TREPPFYIITEFM	331	pY	Y	1149	NP_009297
25	RLMTGDTYTAHAG	411	pS_pT	T	1149	NP_009297
25	LMTGDTYTAHAGA	412	pY	Y	1149	NP_009297
25	MTGDTYTAHAGAK	413	pS_pT	T	1149	NP_009297
25	APESLAYNKFSIK	432	pY	Y	1149	NP_009297
25	YPGIDLSQVYELL	465	pS_pT	S	1149	NP_009297
25	GCPEKVYELMRAC	488	pY	Y	1149	NP_009297
25	DHEPAVSPLLPRK	588	pS_pT	S	1149	NP_009297
25	KKKTAPTPPKRSS	632	pS_pT	T	1149	NP_009297
25	PTPPKRSSSFREM	637	pS_pT	S	1149	NP_009297
25	TPPKRSSSFREMD	638	pS_pT	S	1149	NP_009297
25	PPKRSSSFREMDG	639	pS_pT	S	1149	NP_009297
25	TADPAKSPKPSNG	678	pS_pT	S	1149	NP_009297
25	GGSGFRSPHLWKK	702	pS_pT	S	1149	NP_009297
25	EGGGSSSKRFLRS	729	pS_pT	S	1149	NP_009297
25	GGGSSSKRFLRSC	730	Acc	K	1149	NP_009297
25	RFLRSCSASCVPH	737	pS_pT	S	1149	NP_009297
25	TEWRSVTLPRDLQ	754	pS_pT	T	1149	NP_009297
25	VTRGTVTPPPRLV	800	pS_pT	T	1149	NP_009297
25	FKDIMESSPGSSP	823	pS_pT	S	1149	NP_009297
25	KDIMESSPGSSPP	824	pS_pT	S	1149	NP_009297
25	MESSPGSSPPNLT	827	pS_pT	S	1149	NP_009297
25	ESSPGSSPPNLTP	828	pS_pT	S	1149	NP_009297
25	SSPPNLTPKPLRR	833	pS_pT	T	1149	NP_009297
25	KGSALGTPAAAEP	863	pS_pT	T	1149	NP_009297
25	AAAEPVTPTSKAG	871	pS_pT	T	1149	NP_009297
25	AEPVTPTSKAGSG	873	pS_pT	T	1149	NP_009297
25	EPVTPTSKAGSGA	874	pS_pT	S	1149	NP_009297
25	KAGGKPSQSPSQE	934	pS_pT	S	1149	NP_009297
25	GGKPSQSPSQEAA	936	pS_pT	S	1149	NP_009297
25	KPSQSPSQEAAGE	938	pS_pT	S	1149	NP_009297
25	AKTKATSLVDAVN	955	pS_pT	S	1149	NP_009297
25	SDAAKPSQPGEGL	968	pS_pT	S	1149	NP_009297
25	PSGTPISPAPVPS	996	pS_pT	S	1149	NP_009297
25	STLPSASSALAGD	1008	pS_pT	S	1149	NP_009297
27	SSAARPSGRRRDP	31	pS_pT	S	1182	NP_009298
27	GFEGDKTGGSSPE	68	pS_pT	T	1182	NP_009298
27	GDKTGGSSPEALH	71	pS_pT	S	1182	NP_009298
27	DKTGGSSPEALHR	72	pS_pT	S	1182	NP_009298
27	NEAIRWSSKENLL	96	pS_pT	S	1182	NP_009298
27	NLFVALYDFVASG	116	pY	Y	1182	NP_009298
27	KLRVLGYNQNGEW	139	pY	Y	1182	NP_009298
27	GWVPSNYITPVNS	161	pY	Y	1182	NP_009298
27	LEKHSWYHGPVSR	174	pY	Y	1182	NP_009298
27	VRESESSPGQLSI	203	pS_pT	S	1182	NP_009298
27	SSPGQLSISLRYE	208	pS_pT	S	1182	NP_009298
27	TADGKVYVTAESR	231	pY	Y	1182	NP_009298
27	LVTTLHYPAPKCN	261	pY	Y	1182	NP_009298
27	CNKPTVYGVSPIH	272	pY	Y	1182	NP_009298
27	PTVYGVSPIHDKW	275	pS_pT	S	1182	NP_009298
27	KLGGGQYGEVYVG	299	pY	Y	1182	NP_009298
27	GQYGEVYVGVWKK	303	pY	Y	1182	NP_009298
27	VGVWKKYSLTVAV	310	pY	Y	1182	NP_009298
27	WKKYSLTVAVKTL	313	pS_pT	T	1182	NP_009298
27	LMTGDTYTAHAGA	439	pY	Y	1182	NP_009298
27	MTGDTYTAHAGAK	440	pS_pT	T	1182	NP_009298
27	YPGIDLSQVYDLL	492	pS_pT	S	1182	NP_009298
27	GCPPKVYELMRAC	515	pY	Y	1182	NP_009298
27	SSSVVPYLPRLPI	568	pY	Y	1182	NP_009298
27	EGAQDATENSASS	599	pS_pT	T	1182	NP_009298
27	QDATENSASSLAP	602	pS_pT	S	1182	NP_009298
27	IRGAQASSGSPAL	617	pS_pT	S	1182	NP_009298
27	RGAQASSGSPALP	618	pS_pT	S	1182	NP_009298
27	AQASSGSPALPRK	620	pS_pT	S	1182	NP_009298
27	RKQRDKSPSSLLE	631	pS_pT	S	1182	NP_009298
27	QRDKSPSSLLEDA	633	pS_pT	S	1182	NP_009298
27	RDKSPSSLLEDAK	634	pS_pT	S	1182	NP_009298
27	KGGFFSSFMKKRN	655	pS_pT	S	1182	NP_009298
27	PPKRSSSFREMEN	671	pS_pT	S	1182	NP_009298
27	NQPHKKYELTGNF	683	pY	Y	1182	NP_009298
27	LVPPKCYGGSFAQ	718	pY	Y	1182	NP_009298
27	GITGFFTPRLIKK	753	pS_pT	T	1182	NP_009298
27	SKPFPRSNSTSSM	781	pS_pT	S	1182	NP_009298
27	PFPRSNSTSSMSS	783	pS_pT	S	1182	NP_009298
27	FPRSNSTSSMSSG	784	pS_pT	T	1182	NP_009298
27	NSTSSMSSGLPEQ	788	pS_pT	S	1182	NP_009298
27	STSSMSSGLPEQD	789	pS_pT	S	1182	NP_009298
27	KLQLERTVSTSSQ	815	pS_pT	T	1182	NP_009298
27	QLERTVSTSSQPE	817	pS_pT	S	1182	NP_009298
27	LERTVSTSSQPEE	818	pS_pT	T	1182	NP_009298
27	ERTVSTSSQPEEN	819	pS_pT	S	1182	NP_009298
27	RTVSTSSQPEENV	820	pS_pT	S	1182	NP_009298
27	TALPLRTPSGDLA	864	pS_pT	T	1182	NP_009298
27	EQPGWPSPAKAAP	915	pS_pT	S	1182	NP_009298
27	KVPVLISPTLKHT	936	pS_pT	S	1182	NP_009298
27	PVLISPTLKHTPA	938	pS_pT	T	1182	NP_009298
27	SEHQVTSSGDKDR	968	pS_pT	S	1182	NP_009298
27	PQVPLPTSSISPA	1050	pS_pT	T	1182	NP_009298
27	LPTSSISPAKMAN	1054	pS_pT	S	1182	NP_009298
29	PVDHPDYPLLQDA	264	pY	Y	859	NP_068781
30	RGGFKDTTPDELL	59	pS_pT	T	424	NP_001598
30	GGFKDTTPDELLS	60	pS_pT	T	424	NP_001598
30	LLARRSKAEELGL	292	Ub	K	424	NP_001598
31	%%MDEPSPLAQPL	42	pS_pT	S	2383	NP_942131
31	SRFIIGSVSEDNS	60	pS_pT	S	2383	NP_942131
31	FIIGSVSEDNSED	62	pS_pT	S	2383	NP_942131
31	SVSEDNSEDEISN	66	pS_pT	S	2383	NP_942131
31	LEEKEGSLSPASV	85	pS_pT	S	2383	NP_942131
31	EKEGSLSPASVGS	87	pS_pT	S	2383	NP_942131
31	GSLSPASVGSDTL	90	pS_pT	S	2383	NP_942131
31	SPASVGSDTLSDL	93	pS_pT	S	2383	NP_942131
31	ASVGSDTLSDLGI	95	pS_pT	T	2383	NP_942131
31	VGSDTLSDLGISS	97	pS_pT	S	2383	NP_942131
31	ALHIRSSMSGLHL	115	pS_pT	S	2383	NP_942131
31	HIRSSMSGLHLVK	117	pS_pT	S	2383	NP_942131
31	QENDFSKRILNVP	313	Ub	K	2383	NP_942131
31	NVPQELYEKGYVK	323	pY	Y	2383	NP_942131
31	PQELYEKGYVKDV	325	Ub	K	2383	NP_942131
31	ELYEKGYVKDVDD	327	pY	Y	2383	NP_942131
31	GYPVMIKASEGGG	348	Ub	K	2383	NP_942131
31	VSPWGDSPIDFED	525	pS_pT	S	2383	NP_942131
31	NPDEGFKPSSGTV	557	Ub	K	2383	NP_942131
31	ESGCIHYVKRPGA	838	pY	Y	2383	NP_942131
31	QLDNPSKVQQAEL	862	Ub	K	2383	NP_942131
31	KKNLLVTMLIDQL	1079	pS_pT	T	2383	NP_942131
31	PTLNRMSFSSNLN	1238	pS_pT	S	2383	NP_942131
31	SSNLNHYGMTHVA	1246	pY	Y	2383	NP_942131
31	GMTHVASVSDVLL	1253	pS_pT	S	2383	NP_942131
31	THVASVSDVLLDN	1255	pS_pT	S	2383	NP_942131
31	EVMGCFSDSPPQS	1294	pS_pT	S	2383	NP_942131
31	MGCFSDSPPQSPT	1296	pS_pT	S	2383	NP_942131
31	SDSPPQSPTFPEA	1300	pS_pT	S	2383	NP_942131
31	SPPQSPTFPEAGH	1302	pS_pT	T	2383	NP_942131
31	EFTQQNKATLVDH	1353	Ub	K	2383	NP_942131
31	TFLVAQKDFRKQV	1371	Acc	K	2383	NP_942131
31	FEEDRIYRHLEPA	1407	pY	Y	2383	NP_942131
31	HSDLVTKEASFEY	1472	Ub	K	2383	NP_942131
31	LVTKEASFEYLQN	1475	pS_pT	S	2383	NP_942131
31	KEASFEYLQNEGE	1478	pY	Y	2383	NP_942131
31	NTPYVTKDLLQSK	1617	Acc	K	2383	NP_942131
31	LTPQDYKRVSALN	1796	Ub	K	2383	NP_942131
31	ITDIIGKEEGIGP	1825	Ub	K	2383	NP_942131
31	TIQVENSHLILTG	1881	pS_pT	S	2383	NP_942131
31	NSHLILTGAGALN	1886	pS_pT	T	2383	NP_942131
31	GAGALNKVLGREV	1893	Ub	K	2383	NP_942131
31	VPLLNSKDPIDRI	1953	Ub	K	2383	NP_942131
31	IEFVPTKTPYDPR	1966	Ub	K	2383	NP_942131
31	KTYQAIKDFNREG	2068	Acc	K	2383	NP_942131
31	WVVIDSSINPRHM	2136	pS_pT	S	2383	NP_942131
31	PRHMEMYADRESR	2145	pY	Y	2383	NP_942131
31	EGTVEIKFRRKDL	2164	Acc	K	2383	NP_942131
31	SDILDWKTSRTFF	2246	Ub	K	2383	NP_942131
31	ILSTMDSPST%%%	2380	pS_pT	S	2383	NP_942131
32	VPTMRPSMSGLHL	220	pS_pT	S	2458	NP_001084
32	TMRPSMSGLHLVK	222	pS_pT	S	2458	NP_001084
32	GFPLMIKASEGGG	454	Acc	K	2458	NP_001084
32	LSYNGNSYTTYMK	865	pS_pT	S	2458	NP_001084
32	SYNGNSYTTYMKE	866	pY	Y	2458	NP_001084
33	GIKTNAKKDGSDW	189	Acc	K	430	NP_001599
34	RSDPDPKAPANKA	216	Acc	K	425	NP_001120800
34	AMGAFDKTRPVVA	283	Acc	K	425	NP_001120800
34	ALDEATKYALERK	305	Acc	K	425	NP_001120800
34	EHIDKYKN%%%%%	424	Acc	K	425	NP_001120800
35	FGAPLTKLQVIQF	306	Acc	K	412	NP_000008
36	IKSSVKKFAQEQI	70	Ub	K	432	NP_001600
36	ADKEGDYYVLNGS	198	pY	Y	432	NP_001600
36	DKEGDYYVLNGSK	199	pY	Y	432	NP_001600
36	QIGHGYKYAIGSL	284	Acc	K	432	NP_001600
36	QIGHGYKYAIGSL	284	Ub	K	432	NP_001600
37	PAKAESKSFAVGM	71	Acc	K	655	NP_000009
37	VPSPCGKYYTLNG	239	Acc	K	655	NP_000009
37	PATGAVKEKITAF	276	Acc	K	655	NP_000009
37	EVGSGFKVAMHIL	331	Acc	K	655	NP_000009
37	GCMDKGKELSGLG	482	Acc	K	655	NP_000009
37	GLGSALKNPFGNA	492	Ub	K	655	NP_000009
37	LLGEAGKQLRRRA	507	Ub	K	655	NP_000009
38	EKAGIPKEEVKEA	83	Acc	K	427	NP_000010
38	PCTTINKVCASGM	124	Acc	K	427	NP_000010
38	TPYGGVKLEDLIV	174	Acc	K	427	NP_000010
38	TPYGGVKLEDLIV	174	Ub	K	427	NP_000010
38	LEDLIVKDGLTDV	181	Acc	K	427	NP_000010
38	LEDLIVKDGLTDV	181	Ub	K	427	NP_000010
38	LTDVYNKIHMGSC	190	Acc	K	427	NP_000010
38	CAENTAKKLNIAR	202	Acc	K	427	NP_000010
38	QPDVVVKEDEEYK	251	Acc	K	427	NP_000010
38	KRVDFSKVPKLKT	263	Acc	K	427	NP_000010
38	ALKQGEYGLASIC	407	pY	Y	427	NP_000010
39	KAGHFDKEIVPVL	200	Acc	K	397	NP_005882
39	NIEAMSKLKPYFL	233	Acc	K	397	NP_005882
39	EAMSKLKPYFLTD	235	Acc	K	397	NP_005882
39	EAMSKLKPYFLTD	235	Ub	K	397	NP_005882
40	FVYGPLTIRRVLW	39	pS_pT	T	512	NP_001085
41	FSYERLSLKRALW	40	pS_pT	S	574	NP_064423
41	KEAKRSSADKGVA	525	pS_pT	S	574	NP_064423
41	RHNPCESLRGHPA	545	pS_pT	S	574	NP_064423
43	ASSLDVYDGRFLV	164	pY	Y	617	NP_056646
47	ISEQTGKELLYKF	12	Ub	K	1101	NP_001087
47	SQNLVVKPDQLIK	58	Ub	K	1101	NP_001087
47	KPDQLIKRRGKLG	64	Ub	K	1101	NP_001087
47	LIKRRGKLGLVGV	68	Ub	K	1101	NP_001087
47	GVKSWLKPRLGQE	86	Acc	K	1101	NP_001087
47	GVKSWLKPRLGQE	86	Ub	K	1101	NP_001087
47	QEATVGKATGFLK	97	Ub	K	1101	NP_001087
47	ATREGDYVLFHHE	131	pY	Y	1101	NP_001087
47	VGDVDAKAQKLLV	148	Ub	K	1101	NP_001087
47	VDAKAQKLLVGVD	151	Ub	K	1101	NP_001087
47	TADYICKVKWGDI	230	Ub	K	1101	NP_001087
47	DYICKVKWGDIEF	232	Ub	K	1101	NP_001087
47	IADLDAKSGASLK	259	Ub	K	1101	NP_001087
47	ADLDAKSGASLKL	260	pS_pT	S	1101	NP_001087
47	KSGASLKLTLLNP	265	Ub	K	1101	NP_001087
47	LTLLNPKGRIWTM	272	Ub	K	1101	NP_001087
47	DYQGPLKEHEVTI	369	Ub	K	1101	NP_001087
47	RRGGPNYQEGLRV	384	pY	Y	1101	NP_001087
47	NFLLNASGSTSTP	442	pS_pT	S	1101	NP_001087
47	LNASGSTSTPAPS	445	pS_pT	T	1101	NP_001087
47	ASGSTSTPAPSRT	447	pS_pT	T	1101	NP_001087
47	TSTPAPSRTASFS	451	pS_pT	S	1101	NP_001087
47	TPAPSRTASFSES	453	pS_pT	T	1101	NP_001087
47	APSRTASFSESRA	455	pS_pT	S	1101	NP_001087
47	TASFSESRADEVA	459	pS_pT	S	1101	NP_001087
47	APAKKAKPAMPQD	471	Ub	K	1101	NP_001087
47	PAMPQDSVPSPRS	478	pS_pT	S	1101	NP_001087
47	PQDSVPSPRSLQG	481	pS_pT	S	1101	NP_001087
47	PRSLQGKSTTLFS	488	Ub	K	1101	NP_001087
47	LFSRHTKAIVWGM	498	Ub	K	1101	NP_001087
47	SVAAMVYPFTGDH	531	pY	Y	1101	NP_001087
47	PFTGDHKQKFYWG	538	Ub	K	1101	NP_001087
47	KFYWGHKEILIPV	546	Acc	K	1101	NP_001087
47	KFYWGHKEILIPV	546	Ub	K	1101	NP_001087
47	ILIPVFKNMADAM	554	Acc	K	1101	NP_001087
47	ATVGGIKPGCFKI	630	Ub	K	1101	NP_001087
47	CFKIGNTGGMLDN	639	pS_pT	T	1101	NP_001087
47	VAYVSRSGGMSNE	663	pS_pT	S	1101	NP_001087
47	RTTDGVYEGVAIG	682	pY	Y	1101	NP_001087
47	AKNQALKEAGVFV	780	Ub	K	1101	NP_001087
47	LIRKPASFMTSIC	839	pS_pT	S	1101	NP_001087
47	ICARAGKDLVSSL	918	Ub	K	1101	NP_001087
47	AGKDLVSSLTSGL	922	pS_pT	S	1101	NP_001087
47	ALDAAAKMFSKAF	944	Ub	K	1101	NP_001087
47	AAKMFSKAFDSGI	948	Acc	K	1101	NP_001087
47	AAKMFSKAFDSGI	948	Ub	K	1101	NP_001087
47	PMEFVNKMKKEGK	962	Acc	K	1101	NP_001087
47	KMKKEGKLIMGIG	968	Acc	K	1101	NP_001087
47	GIGHRVKSINNPD	978	Acc	K	1101	NP_001087
47	IGHRVKSINNPDM	979	pS_pT	S	1101	NP_001087
47	MRVQILKDYVRQH	991	Ub	K	1101	NP_001087
47	MGFIGHYLDQKRL	1073	pY	Y	1101	NP_001087
47	GHYLDQKRLKQGL	1077	Acc	K	1101	NP_001087
47	GHYLDQKRLKQGL	1077	Ub	K	1101	NP_001087
47	LDQKRLKQGLYRH	1080	Ub	K	1101	NP_001087
47	VLPEHMSM%%%%%	1100	pS_pT	S	1101	NP_001087
48	NIEVPFKPARVIL	79	Ub	K	889	NP_002188
48	AMRDAVKKLGGDP	105	Ub	K	889	NP_002188
48	MRDAVKKLGGDPE	106	Ub	K	889	NP_002188
48	FNRRADSLQKNQD	138	pS_pT	S	889	NP_002188
48	RADSLQKNQDLEF	141	Ub	K	889	NP_002188
48	QDKVAVSDMKKDF	383	pS_pT	S	889	NP_002188
48	VAVSDMKKDFESC	386	Ub	K	889	NP_002188
48	GLNVMPYIKTSLS	466	pY	Y	889	NP_002188
48	IRIDFEKEPLGVN	572	Ub	K	889	NP_002188
48	PLGVNAKGQQVFL	580	Ub	K	889	NP_002188
48	VIPGMFKEVYQKI	610	Ub	K	889	NP_002188
48	FKEVYQKIETVNE	615	Ub	K	889	NP_002188
48	LATPSDKLFFWNS	632	Ub	K	889	NP_002188
48	LFFWNSKSTYIKS	639	Ub	K	889	NP_002188
48	SKSTYIKSPPFFE	644	Ub	K	889	NP_002188
48	EFNSYGSRRGNDA	711	pS_pT	S	889	NP_002188
48	LNRFLNKQAPQTI	736	Ub	K	889	NP_002188
48	FDAAERYQQAGLP	759	pY	Y	889	NP_002188
48	LIVLAGKEYGAGS	772	Ub	K	889	NP_002188
48	SRDWAAKGPFLLG	785	Ub	K	889	NP_002188
48	IIPENLKPQMKVQ	844	Ub	K	889	NP_002188
50	HYDLLEKNINIVR	50	Acc	K	780	NP_001089
50	VGKVAEKEGWPLD	370	Ub	K	780	NP_001089
50	FNPETDYLTGTDG	513	pY	Y	780	NP_001089
50	LTGTDGKKFRLEA	520	Acc	K	780	NP_001089
50	TYQHPPKDSSGQH	549	Acc	K	780	NP_001089
50	GQHVDVSPTSQRL	559	pS_pT	S	780	NP_001089
50	LLEPFDKWDGKDL	573	Acc	K	780	NP_001089
50	AAGPWLKFRGHLD	605	Acc	K	780	NP_001089
51	THILDGSPEKTRR	26	pS_pT	S	660	NP_004026
51	RENMLMKYAQVKP	255	Acc	K	660	NP_004026
51	ENMLMKYAQVKPD	256	pY	Y	660	NP_004026
51	PDGTYVKPLSNKL	267	Acc	K	660	NP_004026
51	LSNKLTYGTMVFV	275	pY	Y	660	NP_004026
51	SAVRHQSEIKPGE	310	pS_pT	S	660	NP_004026
51	TARFLMKSYDQVH	437	Acc	K	660	NP_004026
51	ESLTEAYKLRAAR	487	pY	Y	660	NP_004026
51	LVEIAAKNLQKEV	500	Acc	K	660	NP_004026
51	AAKNLQKEVIHRK	504	Acc	K	660	NP_004026
51	RYDGNVYENLFEW	629	pY	Y	660	NP_004026
51	KAEVHESYKHLKS	649	pS_pT	S	660	NP_004026
51	EVHESYKHLKSLQ	651	Acc	K	660	NP_004026
52	LGNICRSPIAEAV	20	pS_pT	S	158	NP_004291
52	SAATSGYEIGNPP	50	pY	Y	158	NP_004291
52	VKTCKAKIELLGS	113	Ub	K	158	NP_004291
52	IELLGSYDPQKQL	120	pY	Y	158	NP_004291
52	LIIEDPYYGNDSD	132	pY	Y	158	NP_004291
52	IIEDPYYGNDSDF	133	pY	Y	158	NP_004291
52	SDFETVYQQCVRC	143	pY	Y	158	NP_004291
52	CRAFLEKAH%%%%	156	Acc	K	158	NP_004291
58	MVGMGQKDSYVGD	52	Acc	K	377	NP_001091
58	MVGMGQKDSYVGD	52	Ub	K	377	NP_001091
58	GMGQKDSYVGDEA	54	pS_pT	S	377	NP_001091
58	MGQKDSYVGDEAQ	55	pY	Y	377	NP_001091
58	VGDEAQSKRGILT	62	pS_pT	S	377	NP_001091
58	GDEAQSKRGILTL	63	Acc	K	377	NP_001091
58	GDEAQSKRGILTL	63	Ub	K	377	NP_001091
58	RGILTLKYPIEHG	70	Acc	K	377	NP_001091
58	RGILTLKYPIEHG	70	Ub	K	377	NP_001091
58	GILTLKYPIEHGI	71	pY	Y	377	NP_001091
58	IEHGIITNWDDME	79	pS_pT	T	377	NP_001091
58	NWDDMEKIWHHTF	86	Ub	K	377	NP_001091
58	IWHHTFYNELRVA	93	pY	Y	377	NP_001091
58	EAPLNPKANREKM	115	Ub	K	377	NP_001091
58	VPIYEGYALPHAI	171	pY	Y	377	NP_001091
58	GRDLTDYLMKILT	190	pY	Y	377	NP_001091
58	LTDYLMKILTERG	193	Acc	K	377	NP_001091
58	LTDYLMKILTERG	193	Ub	K	377	NP_001091
58	ILTERGYSFVTTA	200	pY	Y	377	NP_001091
58	EIVRDIKEKLCYV	215	Ub	K	377	NP_001091
58	IKEKLCYVALDFE	220	pY	Y	377	NP_001091
58	SSSLEKSYELPDG	241	pS_pT	S	377	NP_001091
58	SSLEKSYELPDGQ	242	pY	Y	377	NP_001091
58	DIRKDLYANNVMS	296	pY	Y	377	NP_001091
58	IADRMQKEITALA	317	Ub	K	377	NP_001091
58	RMQKEITALAPST	320	pS_pT	T	377	NP_001091
58	LAPSTMKIKIIAP	328	Acc	K	377	NP_001091
58	LAPSTMKIKIIAP	328	Ub	K	377	NP_001091
58	PSTMKIKIIAPPE	330	Acc	K	377	NP_001091
58	PSTMKIKIIAPPE	330	Ub	K	377	NP_001091
58	WITKQEYDEAGPS	364	pY	Y	377	NP_001091
59	MVGMGQKDSYVGD	52	Acc	K	377	NP_001604
59	MVGMGQKDSYVGD	52	Ub	K	377	NP_001604
59	GMGQKDSYVGDEA	54	pS_pT	S	377	NP_001604
59	MGQKDSYVGDEAQ	55	pY	Y	377	NP_001604
59	VGDEAQSKRGILT	62	pS_pT	S	377	NP_001604
59	GDEAQSKRGILTL	63	Acc	K	377	NP_001604
59	GDEAQSKRGILTL	63	Ub	K	377	NP_001604
59	RGILTLKYPIEHG	70	Acc	K	377	NP_001604
59	RGILTLKYPIEHG	70	Ub	K	377	NP_001604
59	GILTLKYPIEHGI	71	pY	Y	377	NP_001604
59	IEHGIITNWDDME	79	pS_pT	T	377	NP_001604
59	EAPLNPKANREKM	115	Ub	K	377	NP_001604
59	GRDLTDYLMKILT	190	pY	Y	377	NP_001604
59	LTDYLMKILTERG	193	Acc	K	377	NP_001604
59	LTDYLMKILTERG	193	Ub	K	377	NP_001604
59	EIVRDIKEKLCYV	215	Ub	K	377	NP_001604
59	IKEKLCYVALDFE	220	pY	Y	377	NP_001604
59	SSSLEKSYELPDG	241	pS_pT	S	377	NP_001604
59	SSLEKSYELPDGQ	242	pY	Y	377	NP_001604
59	IADRMQKEITALA	317	Ub	K	377	NP_001604
59	ITALAPSTMKIKI	325	pS_pT	S	377	NP_001604
59	TALAPSTMKIKII	326	pS_pT	T	377	NP_001604
59	LAPSTMKIKIIAP	328	Acc	K	377	NP_001604
59	LAPSTMKIKIIAP	328	Ub	K	377	NP_001604
59	PSTMKIKIIAPPE	330	Acc	K	377	NP_001604
59	PSTMKIKIIAPPE	330	Ub	K	377	NP_001604
59	WISKQEYDEAGPS	364	pY	Y	377	NP_001604
60	LVVDNGSGMCKAG	14	pS_pT	S	375	NP_001092
60	MVGMGQKDSYVGD	50	Acc	K	375	NP_001092
60	MVGMGQKDSYVGD	50	Ub	K	375	NP_001092
60	GMGQKDSYVGDEA	52	pS_pT	S	375	NP_001092
60	MGQKDSYVGDEAQ	53	pY	Y	375	NP_001092
60	VGDEAQSKRGILT	60	pS_pT	S	375	NP_001092
60	GDEAQSKRGILTL	61	Acc	K	375	NP_001092
60	GDEAQSKRGILTL	61	Ub	K	375	NP_001092
60	GILTLKYPIEHGI	69	pY	Y	375	NP_001092
60	IWHHTFYNELRVA	91	pY	Y	375	NP_001092
60	EAPLNPKANREKM	113	Ub	K	375	NP_001092
60	THTVPIYEGYALP	166	pY	Y	375	NP_001092
60	VPIYEGYALPHAI	169	pY	Y	375	NP_001092
60	GRDLTDYLMKILT	188	pY	Y	375	NP_001092
60	LTDYLMKILTERG	191	Acc	K	375	NP_001092
60	LTDYLMKILTERG	191	Ub	K	375	NP_001092
60	ILTERGYSFTTTA	198	pY	Y	375	NP_001092
60	LTERGYSFTTTAE	199	pS_pT	S	375	NP_001092
60	ERGYSFTTTAERE	201	pS_pT	T	375	NP_001092
60	RGYSFTTTAEREI	202	pS_pT	T	375	NP_001092
60	GYSFTTTAEREIV	203	pS_pT	T	375	NP_001092
60	EIVRDIKEKLCYV	213	Ub	K	375	NP_001092
60	VRDIKEKLCYVAL	215	Ub	K	375	NP_001092
60	IKEKLCYVALDFE	218	pY	Y	375	NP_001092
60	SSSLEKSYELPDG	239	pS_pT	S	375	NP_001092
60	SSLEKSYELPDGQ	240	pY	Y	375	NP_001092
60	CDVDIRKDLYANT	291	Ub	K	375	NP_001092
60	DIRKDLYANTVLS	294	pY	Y	375	NP_001092
60	IADRMQKEITALA	315	Ub	K	375	NP_001092
60	RMQKEITALAPST	318	pS_pT	T	375	NP_001092
60	LAPSTMKIKIIAP	326	Acc	K	375	NP_001092
60	LAPSTMKIKIIAP	326	Ub	K	375	NP_001092
60	PSTMKIKIIAPPE	328	Acc	K	375	NP_001092
60	PSTMKIKIIAPPE	328	Ub	K	375	NP_001092
60	WISKQEYDESGPS	362	pY	Y	375	NP_001092
60	KQEYDESGPSIVH	365	pS_pT	S	375	NP_001092
60	YDESGPSIVHRKC	368	pS_pT	S	375	NP_001092
70	MVGMGQKDSYVGD	52	Acc	K	377	NP_005150
70	MVGMGQKDSYVGD	52	Ub	K	377	NP_005150
70	GMGQKDSYVGDEA	54	pS_pT	S	377	NP_005150
70	MGQKDSYVGDEAQ	55	pY	Y	377	NP_005150
70	VGDEAQSKRGILT	62	pS_pT	S	377	NP_005150
70	GDEAQSKRGILTL	63	Acc	K	377	NP_005150
70	GDEAQSKRGILTL	63	Ub	K	377	NP_005150
70	RGILTLKYPIEHG	70	Acc	K	377	NP_005150
70	RGILTLKYPIEHG	70	Ub	K	377	NP_005150
70	GILTLKYPIEHGI	71	pY	Y	377	NP_005150
70	IEHGIITNWDDME	79	pS_pT	T	377	NP_005150
70	NWDDMEKIWHHTF	86	Ub	K	377	NP_005150
70	IWHHTFYNELRVA	93	pY	Y	377	NP_005150
70	EAPLNPKANREKM	115	Ub	K	377	NP_005150
70	GRDLTDYLMKILT	190	pY	Y	377	NP_005150
70	LTDYLMKILTERG	193	Acc	K	377	NP_005150
70	LTDYLMKILTERG	193	Ub	K	377	NP_005150
70	EIVRDIKEKLCYV	215	Ub	K	377	NP_005150
70	SSSLEKSYELPDG	241	pS_pT	S	377	NP_005150
70	SSLEKSYELPDGQ	242	pY	Y	377	NP_005150
70	IADRMQKEITALA	317	Ub	K	377	NP_005150
70	LAPSTMKIKIIAP	328	Acc	K	377	NP_005150
70	LAPSTMKIKIIAP	328	Ub	K	377	NP_005150
70	PSTMKIKIIAPPE	330	Acc	K	377	NP_005150
70	PSTMKIKIIAPPE	330	Ub	K	377	NP_005150
70	WISKQEYDEAGPS	364	pY	Y	377	NP_005150
71	NGSGMCKAGFAGD	18	Ub	K	375	NP_001605
71	MVGMGQKDSYVGD	50	Acc	K	375	NP_001605
71	MVGMGQKDSYVGD	50	Ub	K	375	NP_001605
71	GMGQKDSYVGDEA	52	pS_pT	S	375	NP_001605
71	MGQKDSYVGDEAQ	53	pY	Y	375	NP_001605
71	VGDEAQSKRGILT	60	pS_pT	S	375	NP_001605
71	GDEAQSKRGILTL	61	Acc	K	375	NP_001605
71	GDEAQSKRGILTL	61	Ub	K	375	NP_001605
71	GILTLKYPIEHGI	69	pY	Y	375	NP_001605
71	IWHHTFYNELRVA	91	pY	Y	375	NP_001605
71	EAPLNPKANREKM	113	Ub	K	375	NP_001605
71	THTVPIYEGYALP	166	pY	Y	375	NP_001605
71	VPIYEGYALPHAI	169	pY	Y	375	NP_001605
71	GRDLTDYLMKILT	188	pY	Y	375	NP_001605
71	LTDYLMKILTERG	191	Acc	K	375	NP_001605
71	LTDYLMKILTERG	191	Ub	K	375	NP_001605
71	ILTERGYSFTTTA	198	pY	Y	375	NP_001605
71	LTERGYSFTTTAE	199	pS_pT	S	375	NP_001605
71	GYSFTTTAEREIV	203	pS_pT	T	375	NP_001605
71	EIVRDIKEKLCYV	213	Ub	K	375	NP_001605
71	VRDIKEKLCYVAL	215	Ub	K	375	NP_001605
71	IKEKLCYVALDFE	218	pY	Y	375	NP_001605
71	SSSLEKSYELPDG	239	pS_pT	S	375	NP_001605
71	SSLEKSYELPDGQ	240	pY	Y	375	NP_001605
71	CDVDIRKDLYANT	291	Ub	K	375	NP_001605
71	DIRKDLYANTVLS	294	pY	Y	375	NP_001605
71	IADRMQKEITALA	315	Ub	K	375	NP_001605
71	RMQKEITALAPST	318	pS_pT	T	375	NP_001605
71	ITALAPSTMKIKI	323	pS_pT	S	375	NP_001605
71	LAPSTMKIKIIAP	326	Acc	K	375	NP_001605
71	LAPSTMKIKIIAP	326	Ub	K	375	NP_001605
71	PSTMKIKIIAPPE	328	Acc	K	375	NP_001605
71	PSTMKIKIIAPPE	328	Ub	K	375	NP_001605
71	WISKQEYDESGPS	362	pY	Y	375	NP_001605
71	KQEYDESGPSIVH	365	pS_pT	S	375	NP_001605
71	YDESGPSIVHRKC	368	pS_pT	S	375	NP_001605
72	MVGMGQKDSYVGD	51	Acc	K	376	NP_001606
72	MVGMGQKDSYVGD	51	Ub	K	376	NP_001606
72	GMGQKDSYVGDEA	53	pS_pT	S	376	NP_001606
72	MGQKDSYVGDEAQ	54	pY	Y	376	NP_001606
72	VGDEAQSKRGILT	61	pS_pT	S	376	NP_001606
72	GDEAQSKRGILTL	62	Acc	K	376	NP_001606
72	GDEAQSKRGILTL	62	Ub	K	376	NP_001606
72	RGILTLKYPIEHG	69	Acc	K	376	NP_001606
72	RGILTLKYPIEHG	69	Ub	K	376	NP_001606
72	GILTLKYPIEHGI	70	pY	Y	376	NP_001606
72	IEHGIITNWDDME	78	pS_pT	T	376	NP_001606
72	EAPLNPKANREKM	114	Ub	K	376	NP_001606
72	GRDLTDYLMKILT	189	pY	Y	376	NP_001606
72	LTDYLMKILTERG	192	Acc	K	376	NP_001606
72	LTDYLMKILTERG	192	Ub	K	376	NP_001606
72	EIVRDIKEKLCYV	214	Ub	K	376	NP_001606
72	IKEKLCYVALDFE	219	pY	Y	376	NP_001606
72	SSSLEKSYELPDG	240	pS_pT	S	376	NP_001606
72	SSLEKSYELPDGQ	241	pY	Y	376	NP_001606
72	IADRMQKEITALA	316	Ub	K	376	NP_001606
72	LAPSTMKIKIIAP	327	Acc	K	376	NP_001606
72	LAPSTMKIKIIAP	327	Ub	K	376	NP_001606
72	PSTMKIKIIAPPE	329	Acc	K	376	NP_001606
72	PSTMKIKIIAPPE	329	Ub	K	376	NP_001606
72	WISKPEYDEAGPS	363	pY	Y	376	NP_001606
81	%%%MVDYHAANQS	4	pY	Y	911	NP_004915
81	GGSMGDYMAQEDD	31	pY	Y	911	NP_004915
81	WEKQQRKTFTAWC	54	Ub	K	911	NP_004915
81	KINNVNKALDFIA	114	Acc	K	911	NP_004915
81	FAIQDISVEETSA	159	pS_pT	S	911	NP_004915
81	RKTAPYKNVNVQN	181	Ub	K	911	NP_004915
81	RPELIEYDKLRKD	212	pY	Y	911	NP_004915
81	ELIEYDKLRKDDP	214	Acc	K	911	NP_004915
81	AFEVAEKYLDIPK	233	Ub	K	911	NP_004915
81	FEVAEKYLDIPKM	234	pY	Y	911	NP_004915
81	TYVSSFYHAFSGA	265	pY	Y	911	NP_004915
81	PPKVQEKCQLEIN	350	Ub	K	911	NP_004915
81	FMPSEGKMVSDIN	378	Ub	K	911	NP_004915
81	LDHLAEKFRQKAS	417	Acc	K	911	NP_004915
81	LDHLAEKFRQKAS	417	Ub	K	911	NP_004915
81	AEKFRQKASIHEA	421	Ub	K	911	NP_004915
81	KFRQKASIHEAWT	423	pS_pT	S	911	NP_004915
81	YETATLSDIKALI	447	pS_pT	S	911	NP_004915
81	KHEAFESDLAAHQ	461	pS_pT	S	911	NP_004915
81	AILAIHKEAQRIA	592	Acc	K	911	NP_004915
81	TPQIINSKWEKVQ	621	pS_pT	S	911	NP_004915
81	INSKWEKVQQLVP	625	Acc	K	911	NP_004915
81	INSKWEKVQQLVP	625	Ub	K	911	NP_004915
81	VQQLVPKRDHALL	632	Ub	K	911	NP_004915
81	VGPWIQTKMEEIG	667	pS_pT	T	911	NP_004915
81	SIEMNGTLEDQLS	682	pS_pT	T	911	NP_004915
81	VENQILTRDAKGI	756	pS_pT	T	911	NP_004915
81	KVLAGDKNFITAE	859	Ub	K	911	NP_004915
86	%MSGGVYGGDEVG	6	pY	Y	429	NP_004292
86	MEIDGDKGKQGGP	60	Ub	K	429	NP_004292
86	IDGDKGKQGGPTY	62	Ub	K	429	NP_004292
86	PYMIASKEAVREG	226	Ub	K	429	NP_004292
86	EAVREGSPANWKR	233	pS_pT	S	429	NP_004292
86	FGAERLKIPEGLF	303	Ub	K	429	NP_004292
86	NRELSQKTPPSMR	371	Ub	K	429	NP_004292
86	PPSMRLKLIANNT	379	Ub	K	429	NP_004292
87	%MDHYDSQQTNDY	6	pS_pT	S	914	NP_001123476
87	SQQTNDYMQPEED	12	pY	Y	914	NP_001123476
87	HLRKAGTQIENIE	50	pS_pT	T	914	NP_001123476
87	KISNVNKALDFIA	95	Acc	K	914	NP_001123476
87	FAIQDISVEETSA	140	pS_pT	S	914	NP_001123476
87	RPELIDYGKLRKD	193	pY	Y	914	NP_001123476
87	ELIDYGKLRKDDP	195	Acc	K	914	NP_001123476
87	FDVAEKYLDIPKM	215	pY	Y	914	NP_001123476
87	TYVSSFYHAFSGA	246	pY	Y	914	NP_001123476
87	PPKVQEKCQLEIN	331	Ub	K	914	NP_001123476
87	LDHLAEKFRQKAS	398	Acc	K	914	NP_001123476
87	AEKFRQKASIHEA	402	Ub	K	914	NP_001123476
87	LGALTQKRREALE	492	Acc	K	914	NP_001123476
87	HNERLRKQFGAQA	633	Ub	K	914	NP_001123476
87	HLRQYEKSIVNYK	676	Acc	K	914	NP_001123476
87	VENQILTRDAKGI	737	pS_pT	T	914	NP_001123476
88	FAIQDISVEETSA	147	pS_pT	S	894	NP_001094
88	AEDIVNTPKPDER	237	pS_pT	T	894	NP_001094
88	PPKVQEKCQLEIN	338	Ub	K	894	NP_001094
89	FAIQDISVEETSA	154	pS_pT	S	901	NP_001095
90	GEVWRGSWQGENV	226	pS_pT	S	509	NP_001096
90	ALRIKKTLTKIDN	494	pS_pT	T	509	NP_001096
90	RIKKTLTKIDNSL	496	pS_pT	T	509	NP_001096
90	LTKIDNSLDKLKT	501	pS_pT	S	509	NP_001096
91	RVGTKRYMAPEVL	380	pY	Y	505	NP_004293
92	IFPIQDKQSWQNE	226	Ub	K	513	NP_001607
94	KQRGLHSELGESS	155	pS_pT	S	503	NP_000011
95	QSNPHLKEGSVTS	244	Ub	K	408	NP_000657
97	TQAEGKKLGLVGW	33	Ub	K	99	NP_001098
97	LQGPISKVRHMQE	58	Ub	K	99	NP_001098
97	NEKVILKLDYSDF	89	Ub	K	99	NP_001098
100	KPETILYYGRRRG	29	pY	Y	363	NP_000013
100	NVIGMDKPLTLPD	54	Acc	K	363	NP_000013
100	QPNWSPKVVELCK	164	Acc	K	363	NP_000013
100	EAVDILKTERLGH	232	Acc	K	363	NP_000013
100	HAVIRLKNDQANY	284	Ub	K	363	NP_000013
100	STLDTDYQMTKRD	308	pY	Y	363	NP_000013
100	TDYQMTKRDMGFT	312	Acc	K	363	NP_000013
100	ELLDLLYKAYGMP	348	pY	Y	363	NP_000013
102	NTTADEKDPTNPF	284	Ub	K	748	NP_001101
103	HYNGPSKAGYVDF	443	Ub	K	1226	NP_001102
103	AAMKAMTILLEEA	567	pS_pT	T	1226	NP_001102
103	TEKESEKTAESQT	595	Ub	K	1226	NP_001102
103	SEKTAESQTPTPS	599	pS_pT	S	1226	NP_001102
103	KTAESQTPTPSAT	601	pS_pT	T	1226	NP_001102
103	AESQTPTPSATSF	603	pS_pT	T	1226	NP_001102
103	PTPSATSFFSGKS	608	pS_pT	S	1226	NP_001102
103	SATSFFSGKSPVT	611	pS_pT	S	1226	NP_001102
103	SFFSGKSPVTTLL	614	pS_pT	S	1226	NP_001102
103	SVSAPSKKVAKQM	665	Ub	K	1226	NP_001102
103	GPPHEPKFVYQAK	757	Ub	K	1226	NP_001102
103	MGFTEVTPVTGAS	808	pS_pT	T	1226	NP_001102
103	GASLRRTMLLLSR	818	pS_pT	T	1226	NP_001102
103	RTMLLLSRSPEAQ	823	pS_pT	S	1226	NP_001102
103	MLLLSRSPEAQPK	825	pS_pT	S	1226	NP_001102
104	RNLDNVSPKDGST	26	pS_pT	S	741	NP_056648
104	QDQFSLTP%%%%%	740	pS_pT	T	741	NP_056648
109	GFSEPEYSAEYSA	12	pY	Y	1144	NP_004027
109	GGVLGQKRWQYDV	428	Ub	K	1144	NP_004027
109	IEVHDQKERVYEM	878	Ub	K	1144	NP_004027
109	GFASSNKEDKSER	1001	Ub	K	1144	NP_004027
109	LRIGMNKGGVLAG	1046	Ub	K	1144	NP_004027
109	VASRMESTGVMGN	1076	pS_pT	S	1144	NP_004027
109	PIFVKGKGELLTF	1111	Ub	K	1144	NP_004027
109	LLTFFLKGRDKLA	1120	Ub	K	1144	NP_004027
111	SGSKSVSPPGYAA	8	pS_pT	S	1261	NP_899200
111	LAIALRTNAQDQF	368	pS_pT	T	1261	NP_899200
112	RAGGFCTPRYMSC	40	pS_pT	T	1168	NP_056085
112	RDAEPPSPTPAGP	54	pS_pT	S	1168	NP_056085
112	VQVFQSKQFRSAK	129	Ub	K	1168	NP_056085
112	QRTRANSMEGLMP	576	pS_pT	S	1168	NP_056085
113	ITEATLKHLDKAY	422	Acc	K	1080	NP_001105
113	TLKHLDKAYEVED	426	Acc	K	1080	NP_001105
113	QRDPYLKEMNIRT	443	Ub	K	1080	NP_001105
113	GVIGARKPQYDIW	1006	Ub	K	1080	NP_001105
114	HQFHRIYIHRYEN	406	pY	Y	1251	NP_001106
114	RIYIHRYENVSIL	410	pY	Y	1251	NP_001106
114	DYRGEIYVKGISE	1154	pY	Y	1251	NP_001106
114	IYVKGISEQEGKI	1159	pS_pT	S	1251	NP_001106
115	KQGDEESENSVKR	354	pS_pT	S	1353	NP_001107
115	DEESENSVKRHAT	357	pS_pT	S	1353	NP_001107
115	VKRHATSSPKNRK	364	pS_pT	S	1353	NP_001107
115	KRHATSSPKNRKK	365	pS_pT	S	1353	NP_001107
115	GPRGQGTASSGNV	608	pS_pT	T	1353	NP_001107
115	RGQGTASSGNVSD	610	pS_pT	S	1353	NP_001107
115	DLAQTVKTFDNLK	622	Ub	K	1353	NP_001107
115	SYRVLSKMGYDFD	1218	Ub	K	1353	NP_001107
115	IPQHQLSISPDIR	1257	pS_pT	S	1353	NP_001107
115	QHQLSISPDIRVQ	1259	pS_pT	S	1353	NP_001107
115	AKDAHLSPKRPWK	1307	pS_pT	S	1353	NP_001107
118	RAAVVTSPPPTTA	12	pS_pT	S	768	NP_054908
118	DENNPEYLRERNM	35	pY	Y	768	NP_054908
118	FNMMEQKKRVSMI	55	Ub	K	768	NP_054908
118	EQKKRVSMILQSP	59	pS_pT	S	768	NP_054908
118	DSIAYDKGEKLLR	140	Ub	K	768	NP_054908
118	CEIQVRTLASAGG	331	pS_pT	T	768	NP_054908
118	QVRTLASAGGPDN	334	pS_pT	S	768	NP_054908
118	VLLNPEKYKAKSR	348	Ub	K	768	NP_054908
118	EKYKAKSRSPGSP	353	pS_pT	S	768	NP_054908
118	YKAKSRSPGSPVG	355	pS_pT	S	768	NP_054908
118	KSRSPGSPVGEGT	358	pS_pT	S	768	NP_054908
118	VGEGTGSPPKWQI	366	pS_pT	S	768	NP_054908
118	EKSKKYSDVEVPA	408	pS_pT	S	768	NP_054908
118	ASVTGYSFASDGD	420	pS_pT	S	768	NP_054908
118	TGYSFASDGDSGT	423	pS_pT	S	768	NP_054908
118	FASDGDSGTCSPL	427	pS_pT	S	768	NP_054908
118	SDGDSGTCSPLRH	429	pS_pT	T	768	NP_054908
118	GDSGTCSPLRHSF	431	pS_pT	S	768	NP_054908
118	CSPLRHSFQKQQR	436	pS_pT	S	768	NP_054908
118	KQQREKTRWLNSG	445	pS_pT	T	768	NP_054908
118	EEGQNGSSPKSKT	464	pS_pT	S	768	NP_054908
118	EGQNGSSPKSKTK	465	pS_pT	S	768	NP_054908
118	KEDGHRTSTSAVP	511	pS_pT	T	768	NP_054908
118	EDGHRTSTSAVPN	512	pS_pT	S	768	NP_054908
118	DGHRTSTSAVPNL	513	pS_pT	T	768	NP_054908
118	GHRTSTSAVPNLF	514	pS_pT	S	768	NP_054908
118	AIIEKEYQPHVIV	581	pY	Y	768	NP_054908
118	ERKQKGSEENLDE	617	pS_pT	S	768	NP_054908
118	REQKEKSPPDQPA	631	pS_pT	S	768	NP_054908
118	VPHPPPSTPIKLE	644	pS_pT	S	768	NP_054908
118	PHPPPSTPIKLEE	645	pS_pT	T	768	NP_054908
118	EAHRPPSPTEAPT	700	pS_pT	S	768	NP_054908
118	SPTEAPTEASPEP	706	pS_pT	T	768	NP_054908
118	AEEAAPSAVEEGA	726	pS_pT	S	768	NP_054908
118	AAADPGSDGSPGK	738	pS_pT	S	768	NP_054908
118	DPGSDGSPGKSPS	741	pS_pT	S	768	NP_054908
118	DGSPGKSPSKKKK	745	pS_pT	S	768	NP_054908
118	SPGKSPSKKKKKF	747	pS_pT	S	768	NP_054908
118	KKKKFRTPSFLKK	755	pS_pT	T	768	NP_054908
118	KKFRTPSFLKKSK	757	pS_pT	S	768	NP_054908
119	EQKKRVTMILQSP	55	pS_pT	T	726	NP_001608
119	NQFVPLYTDPQEV	489	pY	Y	726	NP_001608
119	EKSRSPSTESQLM	532	pS_pT	S	726	NP_001608
119	RSPSTESQLMSKG	535	pS_pT	S	726	NP_001608
119	NPFSQLTDQELEE	561	pS_pT	T	726	NP_001608
119	KEVERKKLELDGE	576	Acc	K	726	NP_001608
119	LELDGEKETAPEE	583	Acc	K	726	NP_001608
119	LDGEKETAPEEPG	585	pS_pT	T	726	NP_001608
119	APEEPGSPAKSAP	592	pS_pT	S	726	NP_001608
119	PGSPAKSAPASPV	596	pS_pT	S	726	NP_001608
119	AKSAPASPVQSPA	600	pS_pT	S	726	NP_001608
119	PASPVQSPAKEAE	604	pS_pT	S	726	NP_001608
119	KEAETKSPLVSPS	613	pS_pT	S	726	NP_001608
119	TKSPLVSPSKSLE	617	pS_pT	S	726	NP_001608
119	SPLVSPSKSLEEG	619	pS_pT	S	726	NP_001608
119	LVSPSKSLEEGTK	621	pS_pT	S	726	NP_001608
119	DKTESVTSGPMSP	688	pS_pT	T	726	NP_001608
119	VTSGPMSPEGSPS	693	pS_pT	S	726	NP_001608
119	PMSPEGSPSKSPS	697	pS_pT	S	726	NP_001608
119	SPEGSPSKSPSKK	699	pS_pT	S	726	NP_001608
119	EGSPSKSPSKKKK	701	pS_pT	S	726	NP_001608
119	SPSKSPSKKKKKF	703	pS_pT	S	726	NP_001608
119	KKKKFRTPSFLKK	711	pS_pT	T	726	NP_001608
119	KKFRTPSFLKKSK	713	pS_pT	S	726	NP_001608
119	KKEKVES%%%%%%	726	pS_pT	S	726	NP_001608
120	SQGVITTPPPPSM	12	pS_pT	T	706	NP_058432
120	TTPPPPSMPHKER	17	pS_pT	S	706	NP_058432
120	NENDPEYIRERNM	35	pY	Y	706	NP_058432
120	IRERNMSPDLRQD	42	pS_pT	S	706	NP_058432
120	VTQILQSPAFRED	64	pS_pT	S	706	NP_058432
120	TLDNLGYRTGYAY	383	pY	Y	706	NP_058432
120	YRTGYAYRHPLIR	389	pY	Y	706	NP_058432
120	EKPRHKSDVEIPA	402	pS_pT	S	706	NP_058432
120	DVEIPATVTAFSF	409	pS_pT	T	706	NP_058432
120	DDTVPLSPLKYMA	423	pS_pT	S	706	NP_058432
120	KTRWLNSPNTYMK	442	pS_pT	S	706	NP_058432
120	LNSPNTYMKVNVP	446	pY	Y	706	NP_058432
120	SPNTYMKVNVPEE	448	Ub	K	706	NP_058432
120	SRNGETSPRTKIT	461	pS_pT	S	706	NP_058432
120	KRVSRLSTSTTIE	650	pS_pT	S	706	NP_058432
120	RVSRLSTSTTIEN	651	pS_pT	T	706	NP_058432
120	KIEEVLSPEGSPS	673	pS_pT	S	706	NP_058432
120	VLSPEGSPSKSPS	677	pS_pT	S	706	NP_058432
120	SPEGSPSKSPSKK	679	pS_pT	S	706	NP_058432
120	EGSPSKSPSKKKK	681	pS_pT	S	706	NP_058432
120	SPSKSPSKKKKKF	683	pS_pT	S	706	NP_058432
120	KKKKFRTPSFLKK	691	pS_pT	T	706	NP_058432
120	KKFRTPSFLKKNK	693	pS_pT	S	706	NP_058432
123	ITGVMDKTKGAVT	140	Ub	K	437	NP_001113
123	SLLTSSKGQLQKM	375	Ub	K	437	NP_001113
124	ELKKPFSIEEVEV	23	pS_pT	S	375	NP_000658
124	FMAKKFSLDALIT	342	pS_pT	S	375	NP_000658
124	HVLPFEKINEGFD	355	Acc	K	375	NP_000658
124	GFDLLHSGKSIRT	365	pS_pT	S	375	NP_000658
125	EVKKPFSIEDVEV	23	pS_pT	S	375	NP_000659
125	VAPPKAYEVRIKM	35	pY	Y	375	NP_000659
125	KNPESNYCLKNDL	111	pY	Y	375	NP_000659
125	FMAKKFSLDALIT	342	pS_pT	S	375	NP_000659
125	HVLPFEKINEGFD	355	Acc	K	375	NP_000659
125	GFDLLHSGKSIRT	365	pS_pT	S	375	NP_000659
126	ELKKPFSIEEVEV	23	pS_pT	S	375	NP_000660
126	CGFSTGYGSAVKV	181	pY	Y	375	NP_000660
127	NPRDLHKPIQEVI	254	Acc	K	380	NP_000661
127	LDCAGGSETMKAA	278	pS_pT	S	380	NP_000661
127	CAGGSETMKAALD	280	pS_pT	T	380	NP_000661
128	KTNLCQKIRVTQG	113	Ub	K	374	NP_000662
128	GLMPDGTSRFTCK	127	pS_pT	T	374	NP_000662
128	LMPDGTSRFTCKG	128	pS_pT	S	374	NP_000662
128	DKFARAKEFGATE	233	Ub	K	374	NP_000662
128	SGEEIATRPFQLV	303	pS_pT	T	374	NP_000662
128	TAFGGWKSVESVP	323	Ub	K	374	NP_000662
128	ELMHSGKSIRTVV	366	Acc	K	374	NP_000662
128	ELMHSGKSIRTVV	366	Ub	K	374	NP_000662
130	LMSDGTSRFTCKG	129	pS_pT	S	375	NP_001095940
130	DGTSRFTCKGKSI	132	pS_pT	T	375	NP_001095940
132	DKDFLDKYSLKPN	47	Acc	K	362	NP_006712
132	LDKYSLKPNDQIL	51	Ub	K	362	NP_006712
132	LFDELVKKFKVEY	71	Ub	K	362	NP_006712
132	KKFKVEYHAGGST	77	pY	Y	362	NP_006712
132	EQGFETKDIKEIA	256	Ub	K	362	NP_006712
133	KLAHQIYQFTDKD	125	pY	Y	185	NP_001115
135	GGSAQESQGNTGL	374	pS_pT	S	412	NP_000666
140	TSIEKNSE%%%%%	317	pS_pT	S	318	NP_000668
141	%%%MEKYVAAMVL	4	pY	Y	357	NP_001116
141	AGDALGYYNGKWE	19	pY	Y	357	NP_001116
141	GDALGYYNGKWEF	20	pY	Y	357	NP_001116
142	MAIMVQSPMFDGK	41	pS_pT	S	1014	NP_001609
142	AGGVTGKGQDGIG	97	Acc	K	1014	NP_001609
142	QDGIGSKAEKTLG	105	Acc	K	1014	NP_001609
142	IGSKAEKTLGDFA	108	Ub	K	1014	NP_001609
142	FAAEYAKSNRSTC	119	Ub	K	1014	NP_001609
142	CKGCMEKIEKGQV	131	Acc	K	1014	NP_001609
142	HPGCFVKNREELG	165	Ub	K	1014	NP_001609
142	GFRPEYSASQLKG	177	pS_pT	S	1014	NP_001609
142	RPEYSASQLKGFS	179	pS_pT	S	1014	NP_001609
142	KSEGKRKGDEVDG	209	Ub	K	1014	NP_001609
142	GVDEVAKKKSKKE	221	Ub	K	1014	NP_001609
142	KLEKALKAQNDLI	239	Ub	K	1014	NP_001609
142	ELLIFNKQQVPSG	269	Ub	K	1014	NP_001609
142	NKQQVPSGESAIL	274	pS_pT	S	1014	NP_001609
142	DVTAWTKCMVKTQ	320	Ub	K	1014	NP_001609
142	KEWVTPKEFREIS	337	Ub	K	1014	NP_001609
142	SASVAATPPPSTA	368	pS_pT	T	1014	NP_001609
142	AATPPPSTASAPA	372	pS_pT	S	1014	NP_001609
142	ATPPPSTASAPAA	373	pS_pT	T	1014	NP_001609
142	KPLSNMKILTLGK	394	Ub	K	1014	NP_001609
142	KILTLGKLSRNKD	400	Ub	K	1014	NP_001609
142	VVAPRGKSGAALS	498	Acc	K	1014	NP_001609
142	SGAALSKKSKGQV	505	Acc	K	1014	NP_001609
142	ALSKKSKGQVKEE	508	Acc	K	1014	NP_001609
142	GINKSEKRMKLTL	521	Acc	K	1014	NP_001609
142	KSEKRMKLTLKGG	524	Acc	K	1014	NP_001609
142	RMKLTLKGGAAVD	528	Ub	K	1014	NP_001609
142	SAHVLEKGGKVFS	548	Acc	K	1014	NP_001609
142	SAHVLEKGGKVFS	548	Ub	K	1014	NP_001609
142	VLEKGGKVFSATL	551	Ub	K	1014	NP_001609
142	GLVDIVKGTNSYY	564	Ub	K	1014	NP_001609
142	QLLEDDKENRYWI	579	Ub	K	1014	NP_001609
142	TVIGSNKLEQMPS	600	Acc	K	1014	NP_001609
142	TVIGSNKLEQMPS	600	Ub	K	1014	NP_001609
142	MKLYEEKTGNAWH	621	Acc	K	1014	NP_001609
142	FTKYPKKFYPLEI	637	Ub	K	1014	NP_001609
142	TKSKLPKPVQDLI	667	Ub	K	1014	NP_001609
142	FDVESMKKAMVEY	683	Ub	K	1014	NP_001609
142	LDIEVAYSLLRGG	775	pY	Y	1014	NP_001609
142	SLLRGGSDDSSKD	782	pS_pT	S	1014	NP_001609
142	RLLWHGSRTTNFA	864	pS_pT	S	1014	NP_001609
143	KRLLDVKNYDPYK	90	Ub	K	1724	NP_006428
143	KNYDPYKPLDITP	96	Ub	K	1724	NP_006428
143	YKPLDITPPPDQK	101	pS_pT	T	1724	NP_006428
143	NYIEELKKQGFLL	223	Ub	K	1724	NP_006428
143	GILLLVKAALKNG	305	Ub	K	1724	NP_006428
143	LVKAALKNGETAE	309	Ub	K	1724	NP_006428
143	TTEFLSKLGNVRP	429	Ub	K	1724	NP_006428
143	EFSNFSKVEDYQL	594	Ub	K	1724	NP_006428
143	YQLPDAKTSSSTK	604	Ub	K	1724	NP_006428
143	IFPLDDKAAVCGF	664	Ub	K	1724	NP_006428
143	ETSHEMKKQTLKS	1151	Ub	K	1724	NP_006428
143	VSELIAKEDVDFL	1200	Ub	K	1724	NP_006428
143	WPELRLSKRKHRK	1236	pS_pT	S	1724	NP_006428
143	EKLLDLSWTESCK	1288	pS_pT	S	1724	NP_006428
143	SWTESCKPTATEP	1294	Ub	K	1724	NP_006428
143	PTARAHSPASLSF	1335	pS_pT	S	1724	NP_006428
143	RAHSPASLSFASY	1338	pS_pT	S	1724	NP_006428
143	LCSQSRTTPVDLC	1493	pS_pT	T	1724	NP_006428
143	CSQSRTTPVDLCL	1494	pS_pT	T	1724	NP_006428
143	LCLLEESVGSLEG	1504	pS_pT	S	1724	NP_006428
143	LEESVGSLEGSRC	1507	pS_pT	S	1724	NP_006428
143	LLDLIATMLVLQF	1629	pS_pT	T	1724	NP_006428
143	QPISTVSPLHRVL	1713	pS_pT	S	1724	NP_006428
147	KNFHEDTLSSTKA	264	pS_pT	T	520	NP_000670
147	HEDTLSSTKAKGH	267	pS_pT	S	520	NP_000670
147	PWTRGGSLERSQS	396	pS_pT	S	520	NP_000670
147	SLERSQSRKDSLD	402	pS_pT	S	520	NP_000670
147	SQSRKDSLDDSGS	406	pS_pT	S	520	NP_000670
147	KDSLDDSGSCLSG	410	pS_pT	S	520	NP_000670
147	SLDDSGSCLSGSQ	412	pS_pT	S	520	NP_000670
148	VVAKRESRGLKSG	215	pS_pT	S	475	NP_150646
148	EKKAAKTLGIVVG	273	pS_pT	T	475	NP_150646
148	FPDFKPSETVFKI	304	pS_pT	S	475	NP_150646
150	RTRVPPSRRGPDA	247	pS_pT	S	465	NP_000672
150	ALDLEESSSSDHA	311	pS_pT	S	465	NP_000672
150	LDLEESSSSDHAE	312	pS_pT	S	465	NP_000672
150	DLEESSSSDHAER	313	pS_pT	S	465	NP_000672
150	LEESSSSDHAERP	314	pS_pT	S	465	NP_000672
150	KGKARASQVKPGD	339	pS_pT	S	465	NP_000672
150	VGAAKASRWRGRQ	375	pS_pT	S	465	NP_000672
153	AGKRRPSRLVALR	312	pS_pT	S	477	NP_000675
153	GDRPRASGCLARP	412	pS_pT	S	477	NP_000675
154	ERLQTVTNYFITS	68	pS_pT	T	413	NP_000015
154	VIAVDRYFAITSP	132	pY	Y	413	NP_000015
154	ITSPFKYQSLLTK	141	pY	Y	413	NP_000015
154	VIMVFVYSRVFQE	219	pY	Y	413	NP_000015
154	FHVQNLSQVEQDG	246	pS_pT	S	413	NP_000015
154	GHGLRRSSKFCLK	261	pS_pT	S	413	NP_000015
154	HGLRRSSKFCLKE	262	pS_pT	S	413	NP_000015
154	GFNPLIYCRSPDF	326	pY	Y	413	NP_000015
154	LLCLRRSSLKAYG	345	pS_pT	S	413	NP_000015
154	LCLRRSSLKAYGN	346	pS_pT	S	413	NP_000015
154	RSSLKAYGNGYSS	350	pY	Y	413	NP_000015
154	KAYGNGYSSNGNT	354	pY	Y	413	NP_000015
154	AYGNGYSSNGNTG	355	pS_pT	S	413	NP_000015
154	YGNGYSSNGNTGE	356	pS_pT	S	413	NP_000015
154	YSSNGNTGEQSGY	360	pS_pT	T	413	NP_000015
154	GNTGEQSGYHVEQ	364	pS_pT	S	413	NP_000015
154	CEDLPGTEDFVGH	384	pS_pT	T	413	NP_000015
154	FVGHQGTVPSDNI	393	pS_pT	T	413	NP_000015
154	HQGTVPSDNIDSQ	396	pS_pT	S	413	NP_000015
154	PSDNIDSQGRNCS	401	pS_pT	S	413	NP_000015
154	SQGRNCSTNDSLL	407	pS_pT	S	413	NP_000015
154	NCSTNDSLL%%%%	411	pS_pT	S	413	NP_000015
156	VLADVSYLMAMEK	13	pY	Y	689	NP_001610
156	TPAARASKKILLP	29	pS_pT	S	689	NP_001610
156	GEVTFEKIFSQKL	57	Ub	K	689	NP_001610
156	EKIFSQKLGYLLF	62	Ub	K	689	NP_001610
156	RPLVEFYEEIKKY	86	pY	Y	689	NP_001610
156	YEEIKKYEKLETE	92	pY	Y	689	NP_001610
156	KFIESDKFTRFCQ	170	Ub	K	689	NP_001610
156	IMLSLVSTGDCPF	247	pS_pT	S	689	NP_001610
156	MLSLVSTGDCPFI	248	pS_pT	T	689	NP_001610
156	MSYAFHTPDKLSF	263	pS_pT	T	689	NP_001610
156	KKKPHASVGTHGY	350	pS_pT	S	689	NP_001610
156	PHASVGTHGYMAP	353	pS_pT	T	689	NP_001610
156	MKNKPRSPVVELS	670	pS_pT	S	689	NP_001610
156	PVVELSKVPLVQR	677	Ub	K	689	NP_001610
156	PLVQRGSANGL%%	685	pS_pT	S	689	NP_001610
157	CRSRQIYDAYIMK	109	pY	Y	688	NP_005151
157	RQIYDAYIMKELL	112	pY	Y	688	NP_005151
157	PHASVGTHGYMAP	353	pS_pT	T	688	NP_005151
158	AGGDHGSPDSYRS	9	pS_pT	S	484	NP_000017
158	LENIDFKMAAEEE	75	Ub	K	484	NP_000017
158	RLADFAKERASLP	147	Acc	K	484	NP_000017
158	QLTTVGKRCCLWI	170	Ub	K	484	NP_000017
158	DKMVTEKAGFKRA	229	Ub	K	484	NP_000017
158	RLLANLKEMEEPF	276	Ub	K	484	NP_000017
158	MEEPFEKQQIGSS	284	Ub	K	484	NP_000017
158	SSAMPYKRNPMRS	295	Acc	K	484	NP_000017
158	QAASVVKQEGGDN	415	Ub	K	484	NP_000017
159	VLANQYKSIYPTL	203	Ub	K	456	NP_001117
159	MVRDGVYFLYEAL	236	pY	Y	456	NP_001117
159	KVEVQYKTLPGWN	403	Ub	K	456	NP_001117
159	SNARAFKELPVNA	419	Ub	K	456	NP_001117
159	ELQIPVKWIGVGK	441	Ub	K	456	NP_001117
160	EIKRINKELANIR	35	Acc	K	977	NP_055018
160	LINNAIKNDLASR	117	Ub	K	977	NP_055018
160	IAGDPRSSPPVQF	517	pS_pT	S	977	NP_055018
160	KGPGAGSALDDGR	626	pS_pT	S	977	NP_055018
160	DGRRDPSSNDING	636	pS_pT	S	977	NP_055018
160	GRRDPSSNDINGG	637	pS_pT	S	977	NP_055018
160	GMEPTPSTVSTPS	649	pS_pT	S	977	NP_055018
160	MEPTPSTVSTPSP	650	pS_pT	T	977	NP_055018
160	PTPSTVSTPSPSA	652	pS_pT	S	977	NP_055018
160	TPSTVSTPSPSAD	653	pS_pT	T	977	NP_055018
160	STVSTPSPSADLL	655	pS_pT	S	977	NP_055018
160	VSTPSPSADLLGL	657	pS_pT	S	977	NP_055018
160	DFFQRWKQLSLPQ	880	Ub	K	977	NP_055018
160	PQQEAQKIFKANH	891	Ub	K	977	NP_055018
160	AEVTKAKLLGFGS	907	Ub	K	977	NP_055018
161	EIKRINKELANIR	35	Acc	K	939	NP_036437
161	LINNAIKNDLASR	117	Ub	K	939	NP_036437
161	SVSLAVSRLSRIV	231	pS_pT	S	939	NP_036437
161	TVINALKTERDVS	377	Ub	K	939	NP_036437
161	NLFPEVKPTIQDV	555	Ub	K	939	NP_036437
161	AKLKKKKGPSTVT	619	Ub	K	939	NP_036437
161	TDLEDTKRDRSVD	631	Ub	K	939	NP_036437
161	LNIQFRYGGTFQN	808	pY	Y	939	NP_036437
161	DFFQRWKQLSNPQ	842	Ub	K	939	NP_036437
162	%%%%%MTDSKYFT	2	pS_pT	T	949	NP_001118
162	%MTDSKYFTTTKK	6	pY	Y	949	NP_001118
162	LKDEDPYVRKTAA	136	pY	Y	949	NP_001118
162	FMEMLSKDLDYYG	272	Ub	K	949	NP_001118
162	YYGTLLKKLAPPL	282	Ub	K	949	NP_001118
162	KRPEILKHEMKVF	318	Acc	K	949	NP_001118
162	NDPIYVKLEKLDI	335	Ub	K	949	NP_001118
162	NIFTVAKRNVEGQ	887	Ub	K	949	NP_001118
162	EGQDMLYQSLKLT	897	pY	Y	949	NP_001118
163	%%%%%MTDSKYFT	2	pS_pT	T	951	NP_001025177
163	%%%MTDSKYFTTN	4	pS_pT	S	951	NP_001025177
163	%MTDSKYFTTNKK	6	pY	Y	951	NP_001025177
163	GEIFELKAELNNE	19	Acc	K	951	NP_001025177
163	AELNNEKKEKRKE	26	Acc	K	951	NP_001025177
163	GCIRVDKITEYLC	117	Ub	K	951	NP_001025177
163	LKDEDPYVRKTAA	136	pY	Y	951	NP_001025177
163	AVKVLMKFLELLP	265	Acc	K	951	NP_001025177
163	FLELLPKDSDYYN	272	Ub	K	951	NP_001025177
163	LPKDSDYYNMLLK	276	pY	Y	951	NP_001025177
163	PKDSDYYNMLLKK	277	pY	Y	951	NP_001025177
163	KRPEILKQEIKVF	318	Acc	K	951	NP_001025177
163	NDPIYVKLEKLDI	335	Ub	K	951	NP_001025177
163	LFLKKPSETQELV	497	pS_pT	S	951	NP_001025177
163	TDPVTAKEVVLSE	538	Ub	K	951	NP_001025177
163	PATFAPSPTPAVV	694	pS_pT	S	951	NP_001025177
163	VWLPAVKAKGLEI	733	Ub	K	951	NP_001025177
163	HRQGHIYMEMNFT	751	pY	Y	951	NP_001025177
163	NVYTIAKRNVEGQ	892	Ub	K	951	NP_001025177
163	EGQDMLYQSLKLT	902	pY	Y	951	NP_001025177
163	NYTLSLKCRAPEV	931	Ub	K	951	NP_001025177
164	NVAKLLYMHMLGY	55	pY	Y	825	NP_001025178
164	YMHMLGYPAHFGQ	61	pY	Y	825	NP_001025178
164	KLIASQKFTDKRI	78	Acc	K	825	NP_001025178
164	LAGEVEKLLKTSN	144	Acc	K	825	NP_001025178
164	NDKNIRYVALTSL	329	pY	Y	825	NP_001025178
164	DLDVSIKRRAMEL	365	Ub	K	825	NP_001025178
164	TVNRIKKVVSIYG	549	Ub	K	825	NP_001025178
165	NQIRASSMLRHGL	404	pS_pT	S	1158	NP_001120
165	KSSRGLKIYAMEI	598	Acc	K	1158	NP_001120
166	HLPQQLKFTTSDS	86	Ub	K	264	NP_945320
166	DSCDRIKDEFQLL	97	Ub	K	264	NP_945320
166	DKLASEKSEMQRH	121	Ub	K	264	NP_945320
166	GAIERAKQVTAPE	179	Ub	K	264	NP_945320
166	EDDGEKSD%%%%%	263	pS_pT	S	264	NP_945320
174	ESQALAKRSCGLF	413	Acc	K	609	NP_001125
175	IPDPSKYCGPYKP	178	pY	Y	346	NP_000018
177	RAELNQSEEPEAG	391	pS_pT	S	404	NP_001127
178	FRLEQGYELQFRL	29	pY	Y	1532	NP_000019
178	ENRRVTKSDPNQH	326	Ub	K	1532	NP_000019
178	EPGSEVYLRRELI	479	pY	Y	1532	NP_000019
178	KPEDCPYLWAHMK	504	pY	Y	1532	NP_000019
178	REAMSAYNSHEEG	584	pY	Y	1532	NP_000019
178	EERFYTKWNPEAL	679	Ub	K	1532	NP_000019
182	EQLNQIKNPIEKH	1123	Ub	K	1218	NP_000205
182	TVPIKDYENKNSK	1139	pY	Y	1218	NP_000205
182	FAKQPAYTLVDRE	1176	pY	Y	1218	NP_000205
185	CLNPLFYGFLGKK	302	pY	Y	359	NP_114038
185	FLQLLKYIPPKAK	319	pY	Y	359	NP_114038
185	SHSNLSTKMSTLS	332	pS_pT	T	359	NP_114038
185	NLSTKMSTLSYRP	335	pS_pT	S	359	NP_114038
185	LSTKMSTLSYRPS	336	pS_pT	T	359	NP_114038
185	TKMSTLSYRPSDN	338	pS_pT	S	359	NP_114038
189	HREAAAYLHGRLQ	297	pY	Y	392	NP_000021
191	SDKLPYKVADIGL	8	Ub	K	432	NP_000678
191	GVHNLYKMMANGI	166	Ub	K	432	NP_000678
191	MANGILKVPAINV	174	Ub	K	432	NP_000678
191	VNDSVTKSKFDNL	186	Ub	K	432	NP_000678
191	DSVTKSKFDNLYG	188	Acc	K	432	NP_000678
191	DSVTKSKFDNLYG	188	Ub	K	432	NP_000678
191	SKFDNLYGCRESL	193	pY	Y	432	NP_000678
191	GYGDVGKGCAQAL	226	Ub	K	432	NP_000678
191	AEAHLGKLNVKLT	401	Acc	K	432	NP_000678
191	LGKLNVKLTKLTE	405	Ub	K	432	NP_000678
191	LNVKLTKLTEKQA	408	Acc	K	432	NP_000678
191	LTKLTEKQAQYLG	412	Ub	K	432	NP_000678
196	ANITYASRKRRKP	12	pS_pT	S	848	NP_001612
196	PVQKTVKPIPAEG	24	Ub	K	848	NP_001612
196	IPAEGIKSNPSKR	32	Ub	K	848	NP_001612
196	GIKSNPSKRHRDR	36	pS_pT	S	848	NP_001612
196	PQDVINKLDKLSV	63	Ub	K	848	NP_001612
196	NKLDKLSVLRLSV	68	pS_pT	S	848	NP_001612
196	FFDVALKSSPTER	88	Ub	K	848	NP_001612
196	CTRGSGYQFIHAA	322	pY	Y	848	NP_001612
196	KNGRPDYIIVTQR	378	pY	Y	848	NP_001612
196	KNGTSGKDSATTS	438	Ub	K	848	NP_001612
196	GNDTILKHEQIDQ	510	Ub	K	848	NP_001612
196	GLFQDSKNSDLYS	535	Ub	K	848	NP_001612
196	RHMQNEKFFRNDF	560	Ub	K	848	NP_001612
197	VYAKCDSSPDSAE	134	pS_pT	S	367	NP_001613
197	YAKCDSSPDSAED	135	pS_pT	S	367	NP_001613
197	CDSSPDSAEDVRK	138	pS_pT	S	367	NP_001613
197	CNLLAEKQYGFCK	225	Acc	K	367	NP_001613
197	TFMGVVSLGSPSG	325	pS_pT	S	367	NP_001613
197	GVVSLGSPSGEVS	328	pS_pT	S	367	NP_001613
197	VSLGSPSGEVSHP	330	pS_pT	S	367	NP_001613
197	SPSGEVSHPRKTR	334	pS_pT	S	367	NP_001613
199	RDLQGGKAFGLLK	11	Acc	K	147	NP_001614
199	RDLQGGKAFGLLK	11	Ub	K	147	NP_001614
199	EGFKEKYMEFDLN	54	pY	Y	147	NP_001614
199	LKRMLEKLGVPKT	76	Ub	K	147	NP_001614
199	LKMILMYEEKARE	124	pY	Y	147	NP_001614
202	RRGSQKSTDSPGA	19	pS_pT	S	1723	NP_001615
202	RGSQKSTDSPGAD	20	pS_pT	T	1723	NP_001615
202	GVASAASPESKPS	75	pS_pT	S	1723	NP_001615
202	KKVMPNSPQNGVL	329	pS_pT	S	1723	NP_001615
202	ELGGETTPPLSTE	525	pS_pT	T	1723	NP_001615
202	PLSTERSPEAVGS	533	pS_pT	S	1723	NP_001615
202	EKVFDPKVFTFGL	747	Acc	K	1723	NP_001615
202	NGGIKRSRLEKSA	827	pS_pT	S	1723	NP_001615
202	RSRLEKSALFSSL	832	pS_pT	S	1723	NP_001615
202	EKSALFSSLLSSL	836	pS_pT	S	1723	NP_001615
202	KSALFSSLLSSLP	837	pS_pT	S	1723	NP_001615
202	LFSSLLSSLPQDK	840	pS_pT	S	1723	NP_001615
202	FSSLLSSLPQDKI	841	pS_pT	S	1723	NP_001615
202	IESVIKSNLPNCA	971	pS_pT	S	1723	NP_001615
202	FMGLFKSSRYDPS	989	pS_pT	S	1723	NP_001615
202	RYDPSISFSGMSL	997	pS_pT	S	1723	NP_001615
203	CEKIVQKYGYTHL	31	Ub	K	194	NP_000467
204	AEPEYPKGIRAVL	14	Acc	K	239	NP_001616
204	GPPGAGKGTQAPR	28	Ub	K	239	NP_001616
204	LETPLCKNGFLLD	93	Ub	K	239	NP_001616
204	LDDLMEKRKEKLD	117	Ub	K	239	NP_001616
204	TTPLIEYYRKRGI	200	pY	Y	239	NP_001616
204	TPLIEYYRKRGIH	201	pY	Y	239	NP_001616
205	QYKDVAKPVIELY	179	Acc	K	223	NP_037542
205	TNKIWPYVYTLFS	205	pY	Y	223	NP_037542
207	SDVAIVKEGWLHK	8	Ub	K	480	NP_005154
207	KEGWLHKRGEYIK	14	Ub	K	480	NP_005154
207	PRYFLLKNDGTFI	30	Ub	K	480	NP_005154
207	ERPRPNTFIIRCL	72	pS_pT	T	480	NP_005154
207	EEMDFRSGSPSDN	122	pS_pT	S	480	NP_005154
207	MDFRSGSPSDNSG	124	pS_pT	S	480	NP_005154
207	FRSGSPSDNSGAE	126	pS_pT	S	480	NP_005154
207	GSPSDNSGAEEME	129	pS_pT	S	480	NP_005154
207	KATGRYYAMKILK	176	pY	Y	480	NP_005154
207	SRERVFSEDRARF	246	pS_pT	S	480	NP_005154
207	DGATMKTFCGTPE	308	pS_pT	T	480	NP_005154
207	FCGTPEYLAPEVL	315	pY	Y	480	NP_005154
207	VLEDNDYGRAVDW	326	pY	Y	480	NP_005154
207	TLGPEAKSLLSGL	377	Ub	K	480	NP_005154
207	SETDTRYFDEEFT	437	pY	Y	480	NP_005154
207	AQMITITPPDQDD	450	pS_pT	T	480	NP_005154
207	PHFPQFSYSASGT	473	pS_pT	S	480	NP_005154
207	HFPQFSYSASGTA	474	pY	Y	480	NP_005154
208	PRYFLLKSDGSFI	30	Ub	K	481	NP_001617
208	MDYKCGSPSDSST	126	pS_pT	S	481	NP_001617
208	VVYRDIKLENLML	277	Ub	K	481	NP_001617
208	DGATMKTFCGTPE	309	pS_pT	T	481	NP_001617
208	VLEDNDYGRAVDW	327	pY	Y	481	NP_001617
208	TLSPEAKSLLAGL	378	Ub	K	481	NP_001617
208	SEVDTRYFDDEFT	438	pY	Y	481	NP_001617
208	DEFTAQSITITPP	447	pS_pT	S	481	NP_001617
208	FTAQSITITPPDR	449	pS_pT	T	481	NP_001617
208	AQSITITPPDRYD	451	pS_pT	T	481	NP_001617
208	THFPQFSYSASIR	474	pS_pT	S	481	NP_001617
208	FPQFSYSASIRE%	476	pS_pT	S	481	NP_001617
208	QFSYSASIRE%%%	478	pS_pT	S	481	NP_001617
211	PSVVSVKTDGGDP	157	Ub	K	640	NP_000679
211	DPSGLLKNFQDIM	168	Ub	K	640	NP_000679
211	KKNDHTYRVFKTV	216	pY	Y	640	NP_000679
211	SDSLITKKQVSVW	242	Ub	K	640	NP_000679
212	LCDLLLSKHGIYV	495	pS_pT	S	587	NP_000023
213	EVAHRFKDLGEEN	36	Acc	K	609	NP_000468
213	TCVADESAENCDK	82	pS_pT	S	609	NP_000468
213	HTLFGDKLCTVAT	97	Acc	K	609	NP_000468
213	ATLRETYGEMADC	108	pY	Y	609	NP_000468
213	MADCCAKQEPERN	117	Acc	K	609	NP_000468
213	ECFLQHKDDNPNL	130	Acc	K	609	NP_000468
213	NEETFLKKYLYEI	160	Acc	K	609	NP_000468
213	EETFLKKYLYEIA	161	Acc	K	609	NP_000468
213	ETFLKKYLYEIAR	162	pY	Y	609	NP_000468
213	FLKKYLYEIARRH	164	pY	Y	609	NP_000468
213	RRHPYFYAPELLF	174	pY	Y	609	NP_000468
213	ELLFFAKRYKAAF	183	Acc	K	609	NP_000468
213	FFAKRYKAAFTEC	186	Acc	K	609	NP_000468
213	CCQAADKAACLLP	198	Acc	K	609	NP_000468
213	SAKQRLKCASLQK	223	Acc	K	609	NP_000468
213	KCASLQKFGERAF	229	Acc	K	609	NP_000468
213	KCASLQKFGERAF	229	Ub	K	609	NP_000468
213	FGERAFKAWAVAR	236	Acc	K	609	NP_000468
213	LSQRFPKAEFAEV	249	Acc	K	609	NP_000468
213	EFAEVSKLVTDLT	257	Acc	K	609	NP_000468
213	DRADLAKYICENQ	286	Acc	K	609	NP_000468
213	ICENQDSISSKLK	294	pS_pT	S	609	NP_000468
213	NQDSISSKLKECC	297	pS_pT	S	609	NP_000468
213	LKECCEKPLLEKS	305	Acc	K	609	NP_000468
213	KNYAEAKDVFLGM	347	Acc	K	609	NP_000468
213	ARRHPDYSVVLLL	365	pY	Y	609	NP_000468
213	LLLRLAKTYETTL	375	Acc	K	609	NP_000468
213	LRLAKTYETTLEK	377	pY	Y	609	NP_000468
213	ADPHECYAKVFDE	394	pY	Y	609	NP_000468
213	KVFDEFKPLVEEP	402	Acc	K	609	NP_000468
213	EQLGEYKFQNALL	426	Acc	K	609	NP_000468
213	LLVRYTKKVPQVS	437	Acc	K	609	NP_000468
213	LVRYTKKVPQVST	438	Acc	K	609	NP_000468
213	KKVPQVSTPTLVE	443	pS_pT	S	609	NP_000468
213	KVPQVSTPTLVEV	444	pS_pT	T	609	NP_000468
213	PQVSTPTLVEVSR	446	pS_pT	T	609	NP_000468
213	VSDRVTKCCTESL	499	Acc	K	609	NP_000468
213	LEVDETYVPKEFN	521	pY	Y	609	NP_000468
213	ICTLSEKERQIKK	543	Acc	K	609	NP_000468
213	KERQIKKQTALVE	549	Acc	K	609	NP_000468
213	HKPKATKEQLKAV	565	Acc	K	609	NP_000468
213	ATKEQLKAVMDDF	569	Acc	K	609	NP_000468
213	FAAFVEKCCKADD	581	Acc	K	609	NP_000468
214	TKKSVQYDDVPEY	80	pY	Y	583	NP_001618
214	YDDVPEYKDRLNL	86	pY	Y	583	NP_001618
214	DDVPEYKDRLNLS	87	Ub	K	583	NP_001618
214	GNMEENKKLEENN	572	Ub	K	583	NP_001618
214	NMEENKKLEENNH	573	Ub	K	583	NP_001618
214	LEENNHKTEA%%%	580	Ub	K	583	NP_001618
215	QLAGIPKMQRRLQ	708	Ub	K	745	NP_000024
215	AHVPAPSPQGPGG	733	pS_pT	S	745	NP_000024
216	DVDKAVKAARQAF	65	Acc	K	501	NP_000680
216	RGRLLYKLADLIE	91	Acc	K	501	NP_000680
216	DLAGCIKTLRYCA	128	Acc	K	501	NP_000680
216	GSTEVGKLIKEAA	252	Acc	K	501	NP_000680
216	SNLKRVTLELGGK	267	pS_pT	T	501	NP_000680
216	ILGNPLTPGVTQG	337	pS_pT	T	501	NP_000680
216	DKEQYDKILDLIE	353	Acc	K	501	NP_000680
216	ILDLIESGKKEGA	360	pS_pT	S	501	NP_000680
216	GKKEGAKLECGGG	367	Acc	K	501	NP_000680
216	PVQQIMKFKSLDD	410	Acc	K	501	NP_000680
216	SLDDVIKRANNTF	419	Acc	K	501	NP_000680
216	RANNTFYGLSAGV	426	pY	Y	501	NP_000680
216	SAGVFTKDIDKAI	435	Acc	K	501	NP_000680
216	GRELGEYGFHEYT	481	pY	Y	501	NP_000680
216	VKTVTVKISQKNS	495	Acc	K	501	NP_000680
217	DVDKAVKAARAAF	81	Acc	K	517	NP_000681
217	LDNGKPYVISYLV	131	pY	Y	517	NP_000681
217	SNLKRVTLELGGK	283	pS_pT	T	517	NP_000681
217	GNPFDSKTEQGPQ	355	Acc	K	517	NP_000681
217	GNPFDSKTEQGPQ	355	Ub	K	517	NP_000681
217	VDETQFKKILGYI	368	Ub	K	517	NP_000681
218	%%%%MSKISEAVK	3	Acc	K	453	NP_000682
218	ETTELLKERFDHI	178	Acc	K	453	NP_000682
218	RFDHILYTGSTGV	186	pY	Y	453	NP_000682
218	GSTGVGKIIMTAA	194	Acc	K	453	NP_000682
218	KLKKSLKEFYGED	269	Acc	K	453	NP_000682
218	EGQKVAYGGTGDA	305	pY	Y	453	NP_000682
219	KPFQESYALDLDE	135	pY	Y	517	NP_000683
219	SNLKRVTLELGGK	283	pS_pT	T	517	NP_000683
219	QGPQVDKEQFERV	364	Acc	K	517	NP_000683
219	PVQPLFKFKKIEE	426	Ub	K	517	NP_000683
220	LEVKFTKIFINNE	33	Ub	K	512	NP_000684
220	FAGWADKIQGKTI	150	Ub	K	512	NP_000684
220	SHPQINKIAFTGS	252	Ub	K	512	NP_000684
220	GSTEVGKLVKEAA	263	Ub	K	512	NP_000684
220	EVGKLVKEAASRS	266	Ub	K	512	NP_000684
220	SNLKRVTLELGGK	278	pS_pT	T	512	NP_000684
220	SVEYAKKRPVGDP	340	Ub	K	512	NP_000684
220	GDPFDVKTEQGPQ	350	Ub	K	512	NP_000684
220	GPQIDQKQFDKIL	360	Ub	K	512	NP_000684
220	ELIESGKKEGAKL	373	Ub	K	512	NP_000684
220	DKGLFIKPTVFSE	394	Ub	K	512	NP_000684
220	DNMRIAKEEIFGP	409	Ub	K	512	NP_000684
220	PVQPILKFKSIEE	421	Ub	K	512	NP_000684
220	QPILKFKSIEEVI	423	Ub	K	512	NP_000684
220	PILKFKSIEEVIK	424	pS_pT	S	512	NP_000684
220	SIEEVIKRANSTD	430	Ub	K	512	NP_000684
220	RANSTDYGLTAAV	437	pY	Y	512	NP_000684
220	STDYGLTAAVFTK	440	pS_pT	T	512	NP_000684
220	TAAVFTKNLDKAL	446	Ub	K	512	NP_000684
221	RFLQENKQLLHDA	41	Ub	K	468	NP_000685
221	KDERVPKNLATQL	89	Ub	K	468	NP_000685
221	GRIINQKQFQRLR	289	Ub	K	468	NP_000685
221	FINRREKPLALYA	360	Ub	K	468	NP_000685
221	LALYAFSNSSQVV	368	pS_pT	S	468	NP_000685
221	RSPGMEKLNALRY	437	Ub	K	468	NP_000685
222	VGKIVMTAATKHL	117	pS_pT	T	385	NP_000686
222	KHLTPVTLELGGK	127	pS_pT	T	385	NP_000686
223	AGLAALSPLLRSL	11	pS_pT	S	518	NP_000687
223	TGTFVVSQPLNYR	33	pS_pT	S	518	NP_000687
223	DASGTEKAFEPAT	54	Ub	K	518	NP_000687
223	FKIWSQKSGMERC	92	Ub	K	518	NP_000687
223	TRVFVQKEILDKF	322	Acc	K	518	NP_000687
223	QKEILDKFTEEVV	327	Ub	K	518	NP_000687
223	FTEEVVKQTQRIK	334	Ub	K	518	NP_000687
223	RVLGFVKVAKEQG	368	Ub	K	518	NP_000687
223	GFVKVAKEQGAKV	371	Ub	K	518	NP_000687
223	GRVTIEYYSQLKT	500	pY	Y	518	NP_000687
224	KIKETVKEFYGEN	266	Ub	K	508	NP_001026976
224	FYGENIKESPDYE	274	Ub	K	508	NP_001026976
224	SLLEGQKIAFGGE	299	Ub	K	508	NP_001026976
224	LTDVDPKTKVMQE	324	Ub	K	508	NP_001026976
224	DVDPKTKVMQEEI	326	Ub	K	508	NP_001026976
224	SKVDWGKFFLLKR	452	Ub	K	508	NP_001026976
224	GKFFLLKRFNKEK	457	Ub	K	508	NP_001026976
225	DGEDGQKQVMVSE	378	Acc	K	740	NP_005155
226	%%%%MPYQYPALT	3	pY	Y	364	NP_000025
226	%%MPYQYPALTPE	5	pY	Y	364	NP_000025
226	YQYPALTPEQKKE	9	pS_pT	T	364	NP_000025
226	ALTPEQKKELSDI	13	Acc	K	364	NP_000025
226	LTPEQKKELSDIA	14	Ub	K	364	NP_000025
226	RIVAPGKGILAAD	28	Ub	K	364	NP_000025
226	ILAADESTGSIAK	36	pS_pT	S	364	NP_000025
226	LAADESTGSIAKR	37	pS_pT	T	364	NP_000025
226	ADESTGSIAKRLQ	39	pS_pT	S	364	NP_000025
226	STGSIAKRLQSIG	42	Acc	K	364	NP_000025
226	STGSIAKRLQSIG	42	Ub	K	364	NP_000025
226	IAKRLQSIGTENT	46	pS_pT	S	364	NP_000025
226	YRQLLLTADDRVN	65	pS_pT	T	364	NP_000025
226	PFPQVIKSKGGVV	99	Ub	K	364	NP_000025
226	PQVIKSKGGVVGI	101	Ub	K	364	NP_000025
226	GGVVGIKVDKGVV	108	Acc	K	364	NP_000025
226	GGVVGIKVDKGVV	108	Ub	K	364	NP_000025
226	VGIKVDKGVVPLA	111	Ub	K	364	NP_000025
226	RCAQYKKDGADFA	140	Ub	K	364	NP_000025
226	DGADFAKWRCVLK	147	Acc	K	364	NP_000025
226	DGADFAKWRCVLK	147	Ub	K	364	NP_000025
226	KWRCVLKIGEHTP	153	Ub	K	364	NP_000025
226	DGDHDLKRCQYVT	200	Ub	K	364	NP_000025
226	DLKRCQYVTEKVL	204	pY	Y	364	NP_000025
226	CQYVTEKVLAAVY	208	Ub	K	364	NP_000025
226	LSDHHIYLEGTLL	223	pY	Y	364	NP_000025
226	LEGTLLKPNMVTP	230	Acc	K	364	NP_000025
226	LEGTLLKPNMVTP	230	Ub	K	364	NP_000025
226	LKPNMVTPGHACT	235	pS_pT	T	364	NP_000025
226	TPGHACTQKFSHE	241	pS_pT	T	364	NP_000025
226	NKCPLLKPWALTF	294	Ub	K	364	NP_000025
226	LQASALKAWGGKK	312	Ub	K	364	NP_000025
226	KAWGGKKENLKAA	318	Ub	K	364	NP_000025
226	GKKENLKAAQEEY	322	Ub	K	364	NP_000025
226	AQEEYVKRALANS	330	Acc	K	364	NP_000025
226	AQEEYVKRALANS	330	Ub	K	364	NP_000025
226	SLACQGKYTPSGQ	342	Ub	K	364	NP_000025
226	QAGAAASESLFVS	354	pS_pT	S	364	NP_000025
226	GAAASESLFVSNH	356	pS_pT	S	364	NP_000025
226	FVSNHAY%%%%%%	364	pY	Y	364	NP_000025
229	ILAADESVGTMGN	36	pS_pT	S	364	NP_000026
229	ADESVGTMGNRLQ	39	pS_pT	T	364	NP_000026
229	AGTNKETTIQGLD	123	pS_pT	T	364	NP_000026
229	GTNKETTIQGLDG	124	pS_pT	T	364	NP_000026
229	DGVDFGKWRAVLR	147	Acc	K	364	NP_000026
229	CQYVTEKVLAAVY	208	Ub	K	364	NP_000026
230	RIVAPGKGILAAD	28	Ub	K	364	NP_005156
230	ILAADESVGSMAK	36	pS_pT	S	364	NP_005156
230	ADESVGSMAKRLS	39	pS_pT	S	364	NP_005156
230	SMAKRLSQIGVEN	45	pS_pT	S	364	NP_005156
230	VGIKVDKGVVPLA	111	Acc	K	364	NP_005156
230	VGIKVDKGVVPLA	111	Ub	K	364	NP_005156
230	VVPLAGTDGETTT	119	pS_pT	T	364	NP_005156
230	RCAQYKKDGADFA	140	Ub	K	364	NP_005156
230	DGADFAKWRCVLK	147	Acc	K	364	NP_005156
230	DGADFAKWRCVLK	147	Ub	K	364	NP_005156
230	DGDHDLKRCQYVT	200	Ub	K	364	NP_005156
230	DLKRCQYVTEKVL	204	pY	Y	364	NP_005156
230	CQYVTEKVLAAVY	208	Ub	K	364	NP_005156
230	ATEEFIKRAEVNG	330	Ub	K	364	NP_005156
231	LLNNGAKMPILGL	12	Ub	K	316	NP_001619
231	GLGTWKSPPGQVT	23	pS_pT	S	316	NP_001619
231	VAIDVGYRHIDCA	40	pY	Y	316	NP_001619
231	IDCAHVYQNENEV	49	pY	Y	316	NP_001619
231	WCTYHEKGLVKGA	86	Acc	K	316	NP_001619
231	WCTYHEKGLVKGA	86	Ub	K	316	NP_001619
231	VKGACQKTLSDLK	95	Acc	K	316	NP_001619
231	QIECHPYLTQEKL	190	pY	Y	316	NP_001619
231	PDRPWAKPEDPSL	222	Acc	K	316	NP_001619
231	NLVVIPKSVTPER	263	Acc	K	316	NP_001619
231	NLVVIPKSVTPER	263	Ub	K	316	NP_001619
238	QPREPLSYSRLQR	45	pS_pT	S	1620	NP_004295
238	PREPLSYSRLQRK	46	pY	Y	1620	NP_004295
238	REPLSYSRLQRKS	47	pS_pT	S	1620	NP_004295
238	SAAIRASQPRLLF	211	pS_pT	S	1620	NP_004295
238	GPGAERSKEMPRG	312	pS_pT	S	1620	NP_004295
238	ELQSPEYKLSKLR	1078	pY	Y	1620	NP_004295
238	STIMTDYNPNYCF	1092	pY	Y	1620	NP_004295
238	TDYNPNYCFAGKT	1096	pY	Y	1620	NP_004295
238	GAFGEVYEGQVSG	1131	pY	Y	1620	NP_004295
238	GMARDIYRASYYR	1278	pY	Y	1620	NP_004295
238	DIYRASYYRKGGC	1282	pY	Y	1620	NP_004295
238	IYRASYYRKGGCA	1283	pY	Y	1620	NP_004295
238	NCPGPVYRIMTQC	1359	pY	Y	1620	NP_004295
238	SLWNPTYGSWFTE	1507	pY	Y	1620	NP_004295
238	PCGNVNYGYQQQG	1584	pY	Y	1620	NP_004295
238	GNVNYGYQQQGLP	1586	pY	Y	1620	NP_004295
238	APGAGHYEDTILK	1604	pY	Y	1620	NP_004295
239	LLRRSTSLPSRLV	246	pS_pT	S	663	NP_000688
240	SLERQLSLEQEVQ	272	pS_pT	S	674	NP_000689
240	MRGRKSSGFPKSV	524	pS_pT	S	674	NP_000689
240	LPYYYLSPDRIPN	664	pS_pT	S	674	NP_000689
242	YKVRVATGTDLLS	10	pS_pT	T	701	NP_001130
242	TDLLSGTRDSISL	18	pS_pT	T	701	NP_001130
244	CHFKKMYGKTLSS	299	pY	Y	327	NP_001621
244	MYGKTLSSMIMED	304	pS_pT	S	327	NP_001621
244	MIMEDTSGDYKNA	312	pS_pT	S	327	NP_001621
244	EDTSGDYKNALLS	315	pY	Y	327	NP_001621
246	AGAFLTYSSFCPP	438	pY	Y	662	NP_001131
248	DRQVPDSAATATA	111	pS_pT	S	528	NP_001622
248	WYVWNRTELMQAS	270	pS_pT	T	528	NP_001622
250	DKHVPDSGATATA	114	pS_pT	S	535	NP_001623
250	VPDSGATATAYLC	117	pS_pT	T	535	NP_001623
250	RYVWNRTELMQAS	273	pS_pT	T	535	NP_001623
250	AYTVLLYGNGPGY	415	pY	Y	535	NP_001623
250	YGNGPGYVLKDGA	421	pY	Y	535	NP_001623
251	DKHVPDSGATATA	111	pS_pT	S	532	NP_112603
251	AYTVLLYGNGPGY	412	pY	Y	532	NP_112603
251	YGNGPGYVLKDGA	418	pY	Y	532	NP_112603
262	TDKQEAYVLSESS	63	pY	Y	334	NP_001625
262	ALVPLLKLARDYS	96	Ub	K	334	NP_001625
262	KDGVTAKDVTRES	201	Ub	K	334	NP_001625
262	CRTVLASPQKIEG	298	pS_pT	S	334	NP_001625
262	VLASPQKIEGFKR	301	Ub	K	334	NP_001625
265	PGYINFSYEVLTP	32	pS_pT	S	191	NP_001133
267	PTQRSDSIRPALN	509	pS_pT	S	643	NP_001135
267	IRPALNSPVERPS	516	pS_pT	S	643	NP_001135
267	SPVERPSSDQEEG	522	pS_pT	S	643	NP_001135
267	PVERPSSDQEEGE	523	pS_pT	S	643	NP_001135
267	RVPLDLSPRLEET	542	pS_pT	S	643	NP_001135
267	RKRFLNKSSEDDA	600	Ub	K	643	NP_001135
267	KRFLNKSSEDDAA	601	pS_pT	S	643	NP_001135
268	PSRDTRYLVLAVD	195	pY	Y	560	NP_000470
271	GLFRLRSRCFLHQ	13	pS_pT	S	879	NP_004028
271	PFKKRASLQASTA	76	pS_pT	S	879	NP_004028
271	PLQSARSLPGPAP	100	pS_pT	S	879	NP_004028
271	PLDLRTSMDGKCK	118	pS_pT	S	879	NP_004028
271	AESELRSAPYEFP	142	pS_pT	S	879	NP_004028
271	ELRSAPYEFPEES	145	pY	Y	879	NP_004028
271	YEFPEESPIEQLE	151	pS_pT	S	879	NP_004028
271	RLERQISQDVKLE	168	pS_pT	S	879	NP_004028
271	KQDFLKTDSDSDL	188	pS_pT	T	879	NP_004028
271	DFLKTDSDSDLQL	190	pS_pT	S	879	NP_004028
271	LKTDSDSDLQLYK	192	pS_pT	S	879	NP_004028
271	DSDLQLYKEQGEG	197	pY	Y	879	NP_004028
271	SDLQLYKEQGEGQ	198	Ub	K	879	NP_004028
271	LQQLAEKPLETRT	276	Ub	K	879	NP_004028
271	FDKFNAKYNPIGE	493	Ub	K	879	NP_004028
271	DKFNAKYNPIGES	494	pY	Y	879	NP_004028
271	YNPIGESVLREIF	500	pS_pT	S	879	NP_004028
271	LREIFIKTDNRVS	508	Ub	K	879	NP_004028
271	DNRVSGKYFAHII	516	Acc	K	879	NP_004028
271	SDLEESKYQNAEL	533	Ub	K	879	NP_004028
271	DLEESKYQNAELR	534	pY	Y	879	NP_004028
272	SFKMIRSQSLSLQ	92	pS_pT	S	776	NP_000471
272	KMIRSQSLSLQMP	94	pS_pT	S	776	NP_000471
272	IRSQSLSLQMPPQ	96	pS_pT	S	776	NP_000471
272	AASPAMSPTTPVV	116	pS_pT	S	776	NP_000471
272	KYARLAYHRFPRI	179	pY	Y	776	NP_000471
272	RELEESKYQYSEP	441	Ub	K	776	NP_000471
272	LGQNYYKEGPEGN	730	Ub	K	776	NP_000471
273	%%MADIKTGIFAK	5	Acc	K	695	NP_001626
273	%MADIKTGIFAKN	6	pS_pT	T	695	NP_001626
273	FAKNVQKRLNRAQ	15	Acc	K	695	NP_001626
273	TIQGAPSDSGPLR	250	pS_pT	S	695	NP_001626
273	PLRIAKTPSPPEE	260	pS_pT	T	695	NP_001626
273	RIAKTPSPPEEPS	262	pS_pT	S	695	NP_001626
273	EPSPLPSPTASPN	272	pS_pT	S	695	NP_001626
273	LPSPTASPNHTLA	276	pS_pT	S	695	NP_001626
273	HTLAPASPAPARP	285	pS_pT	S	695	NP_001626
273	APARPRSPSQTRK	293	pS_pT	S	695	NP_001626
273	ARPRSPSQTRKGP	295	pS_pT	S	695	NP_001626
273	PRSPSQTRKGPPV	297	pS_pT	T	695	NP_001626
273	PPLPKVTPTKELQ	310	pS_pT	T	695	NP_001626
273	LPKVTPTKELQQE	312	pS_pT	T	695	NP_001626
273	EVKKEETLLDLDF	350	pS_pT	T	695	NP_001626
273	PWDLWTTSTDLVQ	387	pS_pT	T	695	NP_001626
273	PAGEGVSLEEAKI	506	pS_pT	S	695	NP_001626
273	VVIEPASNHEEEG	549	pS_pT	S	695	NP_001626
274	PAKGNKSPSPPDG	296	pS_pT	S	593	NP_647593
274	KGNKSPSPPDGSP	298	pS_pT	S	593	NP_647593
274	PSPPDGSPAATPE	303	pS_pT	S	593	NP_647593
274	DGSPAATPEIRVN	307	pS_pT	T	593	NP_647593
274	EPAGGATPGATLP	323	pS_pT	T	593	NP_647593
274	GATPGATLPKSPS	327	pS_pT	T	593	NP_647593
274	GATLPKSPSQLRK	331	pS_pT	S	593	NP_647593
274	TLPKSPSQLRKGP	333	pS_pT	S	593	NP_647593
274	PPPPKHTPSKEVK	348	pS_pT	T	593	NP_647593
277	LALGKDYVRSKIA	189	pY	Y	511	NP_001008219
279	LALEKDYVRSKIA	189	pY	Y	511	NP_000690
284	QTNEILKIHEKNS	186	Acc	K	498	NP_001137
285	YWKGSGYSLKATT	482	pY	Y	496	NP_001138
286	RSRDRKKKADAAT	41	Acc	K	1897	NP_001135918
286	SRDRKKKADAATS	42	Acc	K	1897	NP_001135918
286	VRELVNYGANVNA	133	pY	Y	1897	NP_001135918
286	LHIAAHYENLNVA	249	pY	Y	1897	NP_001135918
286	LLNRGASVNFTPQ	264	pS_pT	S	1897	NP_001135918
286	SPAWNGYTPLHIA	636	pY	Y	1897	NP_001135918
286	KRLGYISVTDVLK	814	pS_pT	S	1897	NP_001135918
286	KAERRDSRDVDEE	875	pS_pT	S	1897	NP_001135918
286	LDQVVESPAIPRI	897	pS_pT	S	1897	NP_001135918
286	SRLCQDYDTIGPE	1114	pY	Y	1897	NP_001135918
286	EGRLRCYCMTDDK	1300	pY	Y	1897	NP_001135918
286	AEDRRRTPTPLAL	1419	pS_pT	T	1897	NP_001135918
286	DRRRTPTPLALRY	1421	pS_pT	T	1897	NP_001135918
286	RGQARITHSPTVS	1725	pS_pT	T	1897	NP_001135918
286	QARITHSPTVSQV	1727	pS_pT	S	1897	NP_001135918
287	RPKKSDSNASFLR	31	pS_pT	S	3957	NP_001139
287	KSDSNASFLRAAR	34	pS_pT	S	3957	NP_001139
287	AAHCGHYRVTKLL	378	pY	Y	3957	NP_001139
287	AATTNGYTPLHIS	531	pY	Y	3957	NP_001139
287	TEVLDVSDEEGDD	846	pS_pT	S	3957	NP_001139
287	EGGRSDSLRSFSS	898	pS_pT	S	3957	NP_001139
287	DRSHTLSHASYLR	911	pS_pT	S	3957	NP_001139
287	LEGKPIYVDCFGN	1382	pY	Y	3957	NP_001139
287	PIYTKESESDQEQ	1459	pS_pT	S	3957	NP_001139
287	YTKESESDQEQEE	1461	pS_pT	S	3957	NP_001139
287	EVPVLASPDLLSE	1500	pS_pT	S	3957	NP_001139
287	DLLSEVSEMKQDL	1508	pS_pT	S	3957	NP_001139
287	MTAILTTDVSDKA	1523	pS_pT	T	3957	NP_001139
287	AELKKGSSEESLG	1732	pS_pT	S	3957	NP_001139
287	ELKKGSSEESLGE	1733	pS_pT	S	3957	NP_001139
287	TENQTIKRGQRLP	2051	Acc	K	3957	NP_001139
287	DMDLQISPDRKTS	2127	pS_pT	S	3957	NP_001139
287	AETPETSPESLSF	2243	pS_pT	S	3957	NP_001139
287	LPLPEASVKTDTG	2388	pS_pT	S	3957	NP_001139
287	SHKTPDSLEPSPL	2454	pS_pT	S	3957	NP_001139
287	ESPCRDSLESSPV	2468	pS_pT	S	3957	NP_001139
287	RDSLESSPVEPKM	2472	pS_pT	S	3957	NP_001139
287	MESSGKSPLSPDT	2534	pS_pT	S	3957	NP_001139
287	SGKSPLSPDTPSS	2537	pS_pT	S	3957	NP_001139
287	SPLSPDTPSSEEV	2540	pS_pT	T	3957	NP_001139
287	GEKKRFTPEEEMF	2583	pS_pT	T	3957	NP_001139
287	EPKHTGSGEDESG	2642	pS_pT	S	3957	NP_001139
287	GTTPDTTPARTPT	3083	pS_pT	T	3957	NP_001139
287	DTTPARTPTEEGT	3087	pS_pT	T	3957	NP_001139
287	TPTEEGTPTSEQN	3093	pS_pT	T	3957	NP_001139
287	SDRGDDSPDSSPE	3273	pS_pT	S	3957	NP_001139
287	RVEQQLSDLDTSV	3362	pS_pT	S	3957	NP_001139
287	IAPDNRSKSESDA	3388	pS_pT	S	3957	NP_001139
287	PDNRSKSESDASS	3390	pS_pT	S	3957	NP_001139
287	NRSKSESDASSLD	3392	pS_pT	S	3957	NP_001139
287	CPVKTRSYTETET	3409	pS_pT	S	3957	NP_001139
287	PVKTRSYTETETE	3410	pY	Y	3957	NP_001139
287	QSHALLKYWLERD	3618	Ub	K	3957	NP_001139
287	PKTEGDSSATALF	3735	pS_pT	S	3957	NP_001139
287	QEYFVTTPGTETS	3776	pS_pT	T	3957	NP_001139
287	AMIVPSSPSKTPE	3793	pS_pT	S	3957	NP_001139
287	IVPSSPSKTPEEV	3795	pS_pT	S	3957	NP_001139
287	PSSPSKTPEEVST	3797	pS_pT	T	3957	NP_001139
287	KTPEEVSTPAEEE	3802	pS_pT	S	3957	NP_001139
287	TPEEVSTPAEEEK	3803	pS_pT	T	3957	NP_001139
287	SSERGGSPIIQEP	3823	pS_pT	S	3957	NP_001139
287	SEHREESSPRKTS	3839	pS_pT	S	3957	NP_001139
287	ESSPRKTSLVIVE	3844	pS_pT	T	3957	NP_001139
287	SLVIVESADNQPE	3851	pS_pT	S	3957	NP_001139
288	QAEVVRYLVQDGA	484	pY	Y	4377	NP_066267
288	AATTSGYTPLHLS	533	pY	Y	4377	NP_066267
288	TGDTDKYLGPQDL	883	pY	Y	4377	NP_066267
288	SLPAEGYMGFSLG	902	pY	Y	4377	NP_066267
288	EGYMGFSLGARSA	906	pS_pT	S	4377	NP_066267
288	REFDSDSLRHYSW	959	pS_pT	S	4377	NP_066267
288	ICRIITKDFPQYF	1128	Acc	K	4377	NP_066267
288	DDEIEKTDRRQSF	1454	pS_pT	T	4377	NP_066267
288	KTDRRQSFASLAL	1459	pS_pT	S	4377	NP_066267
288	RRQSFASLALRKR	1462	pS_pT	S	4377	NP_066267
288	SSSLPFKSIITSA	1661	Acc	K	4377	NP_066267
288	SPKSPKSDKGHSP	1979	pS_pT	S	4377	NP_066267
288	QDEHDKYQLAEPV	3293	pY	Y	4377	NP_066267
288	VIEEEGKVGPDED	3472	Acc	K	4377	NP_066267
288	LDRLDDSPDQCRD	4229	pS_pT	S	4377	NP_066267
288	EAKTKSYFPESQN	4266	pY	Y	4377	NP_066267
288	HVEEPASPLAAYQ	4298	pS_pT	S	4377	NP_066267
288	ASPLAAYQKSLEE	4303	pY	Y	4377	NP_066267
288	TSPADGKPRLSLH	4338	Ub	K	4377	NP_066267
290	RPSEFNYVWIVPI	582	pY	Y	967	NP_001141
290	VWIVPITSIRDGR	589	pS_pT	T	967	NP_001141
290	WIVPITSIRDGRQ	590	pS_pT	S	967	NP_001141
290	KKDNEETGFGSGT	928	pS_pT	T	967	NP_001141
291	APIERVKLLLQVQ	33	Ub	K	298	NP_001142
291	QVQHASKQISAEK	43	Ub	K	298	NP_001142
291	CVVRIPKEQGFLS	63	Ub	K	298	NP_001142
291	LANVIRYFPTQAL	81	pY	Y	298	NP_001142
291	VIRYFPTQALNFA	84	pS_pT	T	298	NP_001142
291	ALNFAFKDKYKQL	92	Acc	K	298	NP_001142
291	ALNFAFKDKYKQL	92	Ub	K	298	NP_001142
291	AFKDKYKQLFLGG	96	Acc	K	298	NP_001142
291	AFKDKYKQLFLGG	96	Ub	K	298	NP_001142
291	GGAAGATSLCFVY	126	pS_pT	T	298	NP_001142
291	GAAGATSLCFVYP	127	pS_pT	S	298	NP_001142
291	LAADVGKGAAQRE	147	Ub	K	298	NP_001142
291	IIYRAAYFGVYDT	191	pY	Y	298	NP_001142
291	AAYFGVYDTAKGM	195	pY	Y	298	NP_001142
291	GVYDTAKGMLPDP	199	Ub	K	298	NP_001142
291	GAKAFFKGAWSNV	272	Acc	K	298	NP_001142
291	GAKAFFKGAWSNV	272	Ub	K	298	NP_001142
291	VLYDEIKKYV%%%	295	Ub	K	298	NP_001142
292	%%%%%MTDAAVSF	2	pS_pT	T	298	NP_001143
292	MTDAAVSFAKDFL	7	pS_pT	S	298	NP_001143
292	AAVSFAKDFLAGG	10	Ub	K	298	NP_001143
292	VAAAISKTAVAPI	23	Acc	K	298	NP_001143
292	VAAAISKTAVAPI	23	Ub	K	298	NP_001143
292	APIERVKLLLQVQ	33	Ub	K	298	NP_001143
292	LQVQHASKQITAD	42	pS_pT	S	298	NP_001143
292	QVQHASKQITADK	43	Ub	K	298	NP_001143
292	CVVRIPKEQGVLS	63	Ub	K	298	NP_001143
292	LANVIRYFPTQAL	81	pY	Y	298	NP_001143
292	VIRYFPTQALNFA	84	pS_pT	T	298	NP_001143
292	ALNFAFKDKYKQI	92	Acc	K	298	NP_001143
292	ALNFAFKDKYKQI	92	Ub	K	298	NP_001143
292	AFKDKYKQIFLGG	96	Acc	K	298	NP_001143
292	AFKDKYKQIFLGG	96	Ub	K	298	NP_001143
292	FLGGVDKRTQFWL	105	Acc	K	298	NP_001143
292	LAADVGKAGAERE	147	Ub	K	298	NP_001143
292	LGDCLVKIYKSDG	163	Acc	K	298	NP_001143
292	LGDCLVKIYKSDG	163	Ub	K	298	NP_001143
292	CLVKIYKSDGIKG	166	Ub	K	298	NP_001143
292	IIYRAAYFGIYDT	191	pY	Y	298	NP_001143
292	AAYFGIYDTAKGM	195	pY	Y	298	NP_001143
292	GIYDTAKGMLPDP	199	Acc	K	298	NP_001143
292	GIYDTAKGMLPDP	199	Ub	K	298	NP_001143
292	MMQSGRKGTDIMY	245	Ub	K	298	NP_001143
292	ARDEGGKAFFKGA	268	Acc	K	298	NP_001143
292	ARDEGGKAFFKGA	268	Ub	K	298	NP_001143
292	GGKAFFKGAWSNV	272	Acc	K	298	NP_001143
292	GGKAFFKGAWSNV	272	Ub	K	298	NP_001143
292	VLYDEIKKYT%%%	295	Ub	K	298	NP_001143
293	QAISFAKDFLAGG	10	Ub	K	298	NP_001627
293	IAAAISKTAVAPI	23	Acc	K	298	NP_001627
293	IAAAISKTAVAPI	23	Ub	K	298	NP_001627
293	APIERVKLLLQVQ	33	Ub	K	298	NP_001627
293	QVQHASKQIAADK	43	Ub	K	298	NP_001627
293	CIVRIPKEQGVLS	63	Ub	K	298	NP_001627
293	LANVIRYFPTQAL	81	pY	Y	298	NP_001627
293	VIRYFPTQALNFA	84	pS_pT	T	298	NP_001627
293	ALNFAFKDKYKQI	92	Acc	K	298	NP_001627
293	ALNFAFKDKYKQI	92	Ub	K	298	NP_001627
293	AFKDKYKQIFLGG	96	Acc	K	298	NP_001627
293	AFKDKYKQIFLGG	96	Ub	K	298	NP_001627
293	FLGGVDKHTQFWR	105	Acc	K	298	NP_001627
293	FLGGVDKHTQFWR	105	Ub	K	298	NP_001627
293	LAADVGKSGTERE	147	Ub	K	298	NP_001627
293	AADVGKSGTEREF	148	pS_pT	S	298	NP_001627
293	LGDCLVKITKSDG	163	Ub	K	298	NP_001627
293	CLVKITKSDGIRG	166	Ub	K	298	NP_001627
293	IIYRAAYFGVYDT	191	pY	Y	298	NP_001627
293	AAYFGVYDTAKGM	195	pY	Y	298	NP_001627
293	GVYDTAKGMLPDP	199	Ub	K	298	NP_001627
293	MMQSGRKGADIMY	245	Ub	K	298	NP_001627
293	FRDEGGKAFFKGA	268	Acc	K	298	NP_001627
293	FRDEGGKAFFKGA	268	Ub	K	298	NP_001627
293	GGKAFFKGAWSNV	272	Acc	K	298	NP_001627
293	GGKAFFKGAWSNV	272	Ub	K	298	NP_001627
301	%%MAMVSEFLKQA	5	pS_pT	S	346	NP_000691
301	ENEEQEYVQTVKS	21	pY	Y	346	NP_000691
301	EQEYVQTVKSSKG	24	pS_pT	T	346	NP_000691
301	EYVQTVKSSKGGP	26	Ub	K	346	NP_000691
301	YVQTVKSSKGGPG	27	pS_pT	S	346	NP_000691
301	VQTVKSSKGGPGS	28	pS_pT	S	346	NP_000691
301	QTVKSSKGGPGSA	29	Ub	K	346	NP_000691
301	SKGGPGSAVSPYP	34	pS_pT	S	346	NP_000691
301	GPGSAVSPYPTFN	37	pS_pT	S	346	NP_000691
301	GSAVSPYPTFNPS	39	pY	Y	346	NP_000691
301	YPTFNPSSDVAAL	45	pS_pT	S	346	NP_000691
301	DVAALHKAIMVKG	53	Acc	K	346	NP_000691
301	DVAALHKAIMVKG	53	Ub	K	346	NP_000691
301	HKAIMVKGVDEAT	58	Ub	K	346	NP_000691
301	IIDILTKRNNAQR	71	Ub	K	346	NP_000691
301	AQRQQIKAAYLQE	81	Ub	K	346	NP_000691
301	QQIKAAYLQETGK	84	pY	Y	346	NP_000691
301	AAYLQETGKPLDE	88	pS_pT	T	346	NP_000691
301	YLQETGKPLDETL	90	Ub	K	346	NP_000691
301	PLDETLKKALTGH	97	Ub	K	346	NP_000691
301	LDETLKKALTGHL	98	Ub	K	346	NP_000691
301	ELRAAMKGLGTDE	128	Ub	K	346	NP_000691
301	VYREELKRDLAKD	161	Acc	K	346	NP_000691
301	LKRDLAKDITSDT	166	Ub	K	346	NP_000691
301	LAKDITSDTSGDF	170	pS_pT	S	346	NP_000691
301	ALLSLAKGDRSED	185	Ub	K	346	NP_000691
301	SDARALYEAGERR	207	pY	Y	346	NP_000691
301	EAGERRKGTDVNV	214	Ub	K	346	NP_000691
301	GERRKGTDVNVFN	216	pS_pT	T	346	NP_000691
301	ILTTRSYPQLRRV	230	pY	Y	346	NP_000691
301	LRRVFQKYTKYSK	239	Acc	K	346	NP_000691
301	RRVFQKYTKYSKH	240	pY	Y	346	NP_000691
301	SKHDMNKVLDLEL	250	Acc	K	346	NP_000691
301	SKHDMNKVLDLEL	250	Ub	K	346	NP_000691
301	VLDLELKGDIEKC	257	Ub	K	346	NP_000691
301	PAFFAEKLHQAMK	281	Acc	K	346	NP_000691
301	KLHQAMKGVGTRH	287	Ub	K	346	NP_000691
301	IDMNDIKAFYQKM	312	Acc	K	346	NP_000691
301	IDMNDIKAFYQKM	312	Ub	K	346	NP_000691
302	%%%%%MSTVHEIL	20	pS_pT	S	357	NP_001002858
302	KASFKMSTVHEIL	20	pS_pT	S	357	NP_001002858
302	%%%%MSTVHEILC	21	pS_pT	T	357	NP_001002858
302	ASFKMSTVHEILC	21	pS_pT	T	357	NP_001002858
302	EILCKLSLEGDHS	30	pS_pT	S	357	NP_001002858
302	SLEGDHSTPPSAY	36	pS_pT	S	357	NP_001002858
302	LEGDHSTPPSAYG	37	pS_pT	T	357	NP_001002858
302	DHSTPPSAYGSVK	40	pS_pT	S	357	NP_001002858
302	STPPSAYGSVKAY	42	pY	Y	357	NP_001002858
302	PPSAYGSVKAYTN	44	pS_pT	S	357	NP_001002858
302	SAYGSVKAYTNFD	46	Ub	K	357	NP_001002858
302	YGSVKAYTNFDAE	48	pY	Y	357	NP_001002858
302	NIETAIKTKGVDE	65	Ub	K	357	NP_001002858
302	ETAIKTKGVDEVT	67	Ub	K	357	NP_001002858
302	QDIAFAYQRRTKK	93	pY	Y	357	NP_001002858
302	TKKELASALKSAL	103	pS_pT	S	357	NP_001002858
302	VILGLLKTPAQYD	122	Acc	K	357	NP_001002858
302	VILGLLKTPAQYD	122	Ub	K	357	NP_001002858
302	LKTPAQYDASELK	127	pY	Y	357	NP_001002858
302	YDASELKASMKGL	133	Acc	K	357	NP_001002858
302	YDASELKASMKGL	133	Ub	K	357	NP_001002858
302	SMKGLGTDEDSLI	141	pS_pT	T	357	NP_001002858
302	LGTDEDSLIEIIC	145	pS_pT	S	357	NP_001002858
302	EINRVYKEMYKTD	166	Acc	K	357	NP_001002858
302	EINRVYKEMYKTD	166	Ub	K	357	NP_001002858
302	VYKEMYKTDLEKD	170	Acc	K	357	NP_001002858
302	VYKEMYKTDLEKD	170	Ub	K	357	NP_001002858
302	YKTDLEKDIISDT	175	Acc	K	357	NP_001002858
302	YKTDLEKDIISDT	175	Ub	K	357	NP_001002858
302	LMVALAKGRRAED	194	Acc	K	357	NP_001002858
302	RRAEDGSVIDYEL	202	pS_pT	S	357	NP_001002858
302	DGSVIDYELIDQD	206	pY	Y	357	NP_001002858
302	QDARDLYDAGVKR	217	pY	Y	357	NP_001002858
302	LYDAGVKRKGTDV	222	Ub	K	357	NP_001002858
302	KGTDVPKWISIMT	230	Ub	K	357	NP_001002858
302	SVPHLQKVFDRYK	245	Acc	K	357	NP_001002858
302	SVPHLQKVFDRYK	245	Ub	K	357	NP_001002858
302	FDRYKSYSPYDML	253	pY	Y	357	NP_001002858
302	YKSYSPYDMLESI	256	pY	Y	357	NP_001002858
302	VQCIQNKPLYFAD	284	Ub	K	357	NP_001002858
302	YFADRLYDSMKGK	293	pY	Y	357	NP_001002858
302	RLYDSMKGKGTRD	297	Acc	K	357	NP_001002858
302	SEVDMLKIRSEFK	320	Acc	K	357	NP_001002858
302	SEVDMLKIRSEFK	320	Ub	K	357	NP_001002858
302	FKRKYGKSLYYYI	331	Acc	K	357	NP_001002858
302	FKRKYGKSLYYYI	331	Ub	K	357	NP_001002858
302	KYGKSLYYYIQQD	334	pY	Y	357	NP_001002858
302	YGKSLYYYIQQDT	335	pY	Y	357	NP_001002858
302	GKSLYYYIQQDTK	336	pY	Y	357	NP_001002858
302	YIQQDTKGDYQKA	342	Ub	K	357	NP_001002858
302	YQKALLYLCGGDD	351	pY	Y	357	NP_001002858
306	DAEAIQKAIRGIG	29	Ub	K	323	NP_005130
306	QRQLIVKEYQAAY	58	Ub	K	323	NP_005130
306	QLKKSMKGAGTNE	104	Ub	K	323	NP_005130
306	VDEHLAKQDAQIL	176	Ub	K	323	NP_005130
306	DAQILYKAGENRW	184	Ub	K	323	NP_005130
306	RLHRALKGIGTDE	263	Ub	K	323	NP_005130
306	HYGYSLYSAIKSD	300	pY	Y	323	NP_005130
307	GTVKAASGFNAME	14	pS_pT	S	321	NP_001144
307	GRDEGNYLDDALV	167	pY	Y	321	NP_001144
307	QDAQDLYEAGEKK	181	pY	Y	321	NP_001144
307	LYEAGEKKWGTDE	186	Ub	K	321	NP_001144
307	HVFDEYKRISQKD	215	Acc	K	321	NP_001144
307	DIEQSIKSETSGS	227	Acc	K	321	NP_001144
307	SMKGLGTDDNTLI	265	pS_pT	T	321	NP_001144
307	FKRLYGKSLYSFI	295	Acc	K	321	NP_001144
307	FKRLYGKSLYSFI	295	Ub	K	321	NP_001144
307	YGKSLYSFIKGDT	299	pS_pT	S	321	NP_001144
307	SLYSFIKGDTSGD	302	Acc	K	321	NP_001144
308	TLRKAMKGLGTDE	29	Ub	K	320	NP_001145
308	EISAAFKTLFGRD	58	Ub	K	320	NP_001145
308	DLLDDLKSELTGK	70	Acc	K	320	NP_001145
308	KSELTGKFEKLIV	76	Acc	K	320	NP_001145
308	KSELTGKFEKLIV	76	Ub	K	320	NP_001145
308	LTGKFEKLIVALM	79	Acc	K	320	NP_001145
308	LTGKFEKLIVALM	79	Ub	K	320	NP_001145
308	LIVALMKPSRLYD	86	Ub	K	320	NP_001145
308	SRLYDAYELKHAL	94	pY	Y	320	NP_001145
308	YDAYELKHALKGA	97	Acc	K	320	NP_001145
308	YDAYELKHALKGA	97	Ub	K	320	NP_001145
308	ELKHALKGAGTNE	101	Acc	K	320	NP_001145
308	ELKHALKGAGTNE	101	Ub	K	320	NP_001145
308	GAGTNEKVLTEII	108	Ub	K	320	NP_001145
308	EELRAIKQVYEEE	126	Ub	K	320	NP_001145
308	FQAGELKWGTDEE	186	Ub	K	320	NP_001145
308	WGTDEEKFITIFG	193	Ub	K	320	NP_001145
308	LAETLYYAMKGAG	257	pY	Y	320	NP_001145
308	IRKEFRKNFATSL	290	Ub	K	320	NP_001145
308	NFATSLYSMIKGD	297	pY	Y	320	NP_001145
308	FATSLYSMIKGDT	298	pS_pT	S	320	NP_001145
308	SLYSMIKGDTSGD	301	Ub	K	320	NP_001145
309	QDAEALYTAMKGF	30	pY	Y	673	NP_001146
309	EVCQSYKSLYGKD	63	Acc	K	673	NP_001146
309	YKSLYGKDLIADL	68	Acc	K	673	NP_001146
309	YKSLYGKDLIADL	68	Ub	K	673	NP_001146
309	DLIADLKYELTGK	75	Acc	K	673	NP_001146
309	KYELTGKFERLIV	81	Acc	K	673	NP_001146
309	KYELTGKFERLIV	81	Ub	K	673	NP_001146
309	CDAKEIKDAISGI	102	Ub	K	673	NP_001146
309	GIGTDEKCLIEIL	113	Ub	K	673	NP_001146
309	QLVAAYKDAYERD	135	Ub	K	673	NP_001146
309	DEAQFIYILGNRS	201	pY	Y	673	NP_001146
309	GKPIEASIRGELS	229	pS_pT	S	673	NP_001146
309	AMKGLGTRDNTLI	269	pS_pT	T	673	NP_001146
309	FRTKYEKSLYSMI	299	Acc	K	673	NP_001146
309	KYEKSLYSMIKND	302	pY	Y	673	NP_001146
309	SLYSMIKNDTSGE	306	Acc	K	673	NP_001146
309	DTSGEYKKTLLKL	314	Acc	K	673	NP_001146
309	EAAQVAYQMWELS	340	pY	Y	673	NP_001146
309	NPDADAKALRKAM	370	Acc	K	673	NP_001146
309	ALRKAMKGLGTDE	377	Ub	K	673	NP_001146
309	DLMTDLKSEISGD	418	Acc	K	673	NP_001146
309	DLMTDLKSEISGD	418	Ub	K	673	NP_001146
309	PAHYDAKQLKKAM	442	Acc	K	673	NP_001146
309	YKEDYHKSLEDAL	483	Acc	K	673	NP_001146
309	DTPSGDKTSLETR	540	Ub	K	673	NP_001146
309	VFQEFIKMTNYDV	568	Ub	K	673	NP_001146
309	PLFFADKLYKSMK	607	Acc	K	673	NP_001146
309	FFADKLYKSMKGA	609	pY	Y	673	NP_001146
309	GAGTDEKTLTRIM	620	Acc	K	673	NP_001146
309	REFIEKYDKSLHQ	645	pY	Y	673	NP_001146
310	ILRKAMKGFGTDE	199	Ub	K	488	NP_004025
310	FKTSYGKDLIKDL	233	Acc	K	488	NP_004025
310	YGKDLIKDLKSEL	237	Ub	K	488	NP_004025
310	RLYYAMKGAGTDD	430	Ub	K	488	NP_004025
311	FKTAYGKDLIKDL	248	Acc	K	505	NP_665876
311	YGKDLIKDLKSEL	252	Ub	K	505	NP_665876
311	DLIKDLKSELSGN	255	Acc	K	505	NP_665876
311	LSGNFEKTILALM	264	Ub	K	505	NP_665876
311	TILALMKTPVLFD	271	Ub	K	505	NP_665876
311	PVLFDIYEIKEAI	279	pY	Y	505	NP_665876
311	FDIYEIKEAIKGV	282	Ub	K	505	NP_665876
311	KAEFKKTLEEAIR	321	pS_pT	T	505	NP_665876
311	RDAQELYAAGENR	365	pY	Y	505	NP_665876
311	YKRMYGKSLYHDI	479	Acc	K	505	NP_665876
311	MYGKSLYHDISGD	482	pY	Y	505	NP_665876
316	KMDPVHYPSLADK	542	pY	Y	1338	NP_001150
317	KLQNLCTRLDQDE	204	pS_pT	T	1248	NP_863651
317	LNIEEAKDRLRIL	224	Ub	K	1248	NP_863651
317	LRKHPRSLLILDD	238	pS_pT	S	1248	NP_863651
317	LDDVWDSWVLKAF	248	pS_pT	S	1248	NP_863651
317	VESSLGKEKGLEI	288	Ub	K	1248	NP_863651
320	GECLARSASTESG	78	pS_pT	S	837	NP_001154
320	CLARSASTESGFH	80	pS_pT	S	837	NP_001154
320	PEDESAYAVQYRP	118	pY	Y	837	NP_001154
320	SAYAVQYRPEAEE	122	pY	Y	837	NP_001154
320	RPEAEEYTEQAEA	129	pY	Y	837	NP_001154
320	SDGESDSPEKEAE	248	pS_pT	S	837	NP_001154
320	PYPRMDSYEQEED	263	pS_pT	S	837	NP_001154
321	CASKEGYQDYYPE	193	pY	Y	749	NP_005494
321	NGNTGASPYRLRR	208	pS_pT	S	749	NP_005494
321	VAEIKMSLSMTSI	236	pS_pT	S	749	NP_005494
321	EIKMSLSMTSITS	238	pS_pT	S	749	NP_005494
321	RRRMPRSASQDCI	478	pS_pT	S	749	NP_005494
321	RMPRSASQDCIET	480	pS_pT	S	749	NP_005494
322	ATAVGPKDLRSAM	48	Ub	K	710	NP_001155
322	EEEDLSSPPGLPE	175	pS_pT	S	710	NP_001155
322	EPPGRASPSQGSS	287	pS_pT	S	710	NP_001155
322	FPAQSLSPEPLPQ	347	pS_pT	S	710	NP_001155
322	WGVGRDSGRERDF	459	pS_pT	S	710	NP_001155
322	VQKFQVYYLGNVP	546	pY	Y	710	NP_001155
322	QKFQVYYLGNVPV	547	pY	Y	710	NP_001155
322	KRLGAHTP%%%%%	709	pS_pT	T	710	NP_001155
323	DPNKNLSPTAVIN	123	pS_pT	S	736	NP_775098
323	SQPRRTKSFLNYY	159	Ub	K	736	NP_775098
323	PADLQGSRKGSLS	330	pS_pT	S	736	NP_775098
323	SRKGSLSSVTPSP	336	pS_pT	S	736	NP_775098
323	GSLSSVTPSPTPE	339	pS_pT	T	736	NP_775098
324	KMIAMGSAAALRN	722	pS_pT	S	2843	NP_001120983
324	KDANIMSPGSSLP	744	pS_pT	S	2843	NP_001120983
324	DNIDNLSPKASHR	780	pS_pT	S	2843	NP_001120983
324	GIGLGNYHPATEN	863	pY	Y	2843	NP_001120983
324	KVMEEVSAIHTSQ	895	pS_pT	S	2843	NP_001120983
324	EVSAIHTSQEDRS	899	pS_pT	T	2843	NP_001120983
324	RTCSMPYAKLEYK	951	pY	Y	2843	NP_001120983
324	PSIESYSEDDESK	987	pS_pT	S	2843	NP_001120983
324	SDEQLNSGRQSPS	1038	pS_pT	S	2843	NP_001120983
324	LNSGRQSPSQNER	1042	pS_pT	S	2843	NP_001120983
324	STTYPVYTESTDD	1078	pY	Y	2843	NP_001120983
324	DQPIDYSLKYATD	1180	pS_pT	S	2843	NP_001120983
324	SSENTSTPSSNAK	1220	pS_pT	T	2843	NP_001120983
324	RCSSLSSLSSAED	1279	pS_pT	S	2843	NP_001120983
324	FSSGAKSPSKSGA	1360	pS_pT	S	2843	NP_001120983
324	GAQTPKSPPEHYV	1371	pS_pT	S	2843	NP_001120983
324	RCTSVSSLDSFES	1392	pS_pT	S	2843	NP_001120983
324	PPSRSKTPPPPPQ	1438	pS_pT	T	2843	NP_001120983
324	PPQTAQTKREVPK	1448	pS_pT	T	2843	NP_001120983
324	PKNKAPTAEKRES	1459	pS_pT	T	2843	NP_001120983
324	STPDGFSCSSSLS	1501	pS_pT	S	2843	NP_001120983
324	PDGFSCSSSLSAL	1503	pS_pT	S	2843	NP_001120983
324	DGFSCSSSLSALS	1504	pS_pT	S	2843	NP_001120983
324	GFSCSSSLSALSL	1505	pS_pT	S	2843	NP_001120983
324	SCSSSLSALSLDE	1507	pS_pT	S	2843	NP_001120983
324	SSLSALSLDEPFI	1510	pS_pT	S	2843	NP_001120983
324	AEKTIDSEKDLLD	1559	pS_pT	S	2843	NP_001120983
324	PTEGRSTDEAQGG	1697	pS_pT	T	2843	NP_001120983
324	PIEGTPYCFSRND	1854	pY	Y	2843	NP_001120983
324	CFSRNDSLSSLDF	1861	pS_pT	S	2843	NP_001120983
324	SRNDSLSSLDFDD	1863	pS_pT	S	2843	NP_001120983
324	RNDSLSSLDFDDD	1864	pS_pT	S	2843	NP_001120983
324	SSLSIDSEDDLLQ	2034	pS_pT	S	2843	NP_001120983
324	PKKKKPSRLKGDN	2054	pS_pT	S	2843	NP_001120983
324	DIQRPDSEHGLSP	2088	pS_pT	S	2843	NP_001120983
324	DSEHGLSPDSENF	2093	pS_pT	S	2843	NP_001120983
324	HGLSPDSENFDWK	2096	pS_pT	S	2843	NP_001120983
324	AAAACLSRQASSD	2125	pS_pT	S	2843	NP_001120983
324	CLSRQASSDSDSI	2129	pS_pT	S	2843	NP_001120983
324	LSRQASSDSDSIL	2130	pS_pT	S	2843	NP_001120983
324	SLKSGISLGSPFH	2143	pS_pT	S	2843	NP_001120983
324	SGISLGSPFHLTP	2146	pS_pT	S	2843	NP_001120983
324	GSPFHLTPDQEEK	2151	pS_pT	T	2843	NP_001120983
324	KTPASKSPSEGQT	2260	pS_pT	S	2843	NP_001120983
324	SPSEGQTATTSPR	2266	pS_pT	T	2843	NP_001120983
324	GQTATTSPRGAKP	2270	pS_pT	S	2843	NP_001120983
324	SVKSELSPVARQT	2283	pS_pT	S	2843	NP_001120983
324	PRSESASKGLNQM	2398	pS_pT	S	2843	NP_001120983
324	PVLVRQSTFIKEA	2441	pS_pT	S	2843	NP_001120983
324	VLVRQSTFIKEAP	2442	pS_pT	T	2843	NP_001120983
324	FIKEAPSPTLRRK	2449	pS_pT	S	2843	NP_001120983
324	KEAPSPTLRRKLE	2451	pS_pT	T	2843	NP_001120983
324	ESASFESLSPSSR	2464	pS_pT	S	2843	NP_001120983
324	ESLSPSSRPASPT	2469	pS_pT	S	2843	NP_001120983
324	PSSRPASPTRSQA	2473	pS_pT	S	2843	NP_001120983
324	DIARSHSESPSRL	2533	pS_pT	S	2843	NP_001120983
324	ARSHSESPSRLPI	2535	pS_pT	S	2843	NP_001120983
324	ESKTLIYQMAPAV	2645	pY	Y	2843	NP_001120983
324	PINNPRSGRSPTG	2671	pS_pT	S	2843	NP_001120983
324	NPRSGRSPTGNTP	2674	pS_pT	S	2843	NP_001120983
324	RSGRSPTGNTPPV	2676	pS_pT	T	2843	NP_001120983
324	RSPTGNTPPVIDS	2679	pS_pT	T	2843	NP_001120983
324	QNVGNGSVPMRTV	2710	pS_pT	S	2843	NP_001120983
324	ERTPFSSSSSSKH	2764	pS_pT	S	2843	NP_001120983
324	FSSSSSSKHSSPS	2768	pS_pT	S	2843	NP_001120983
324	SSSKHSSPSGTVA	2772	pS_pT	S	2843	NP_001120983
324	PFNYNPSPRKSSA	2789	pS_pT	S	2843	NP_001120983
324	NPSPRKSSADSTS	2793	pS_pT	S	2843	NP_001120983
324	QSPKRHSGSYLVT	2835	pS_pT	S	2843	NP_001120983
324	PKRHSGSYLVTSV	2837	pS_pT	S	2843	NP_001120983
324	KRHSGSYLVTSV%	2838	pY	Y	2843	NP_001120983
325	LWISVLTSLLEAF	12	pS_pT	T	223	NP_001630
325	WISVLTSLLEAFA	13	pS_pT	S	223	NP_001630
325	LEAFAHTDLSGKV	21	pS_pT	T	223	NP_001630
326	LLSWLLTQDSTAI	68	pS_pT	T	545	NP_000374
326	GTASPGSQLKAKP	156	pS_pT	S	545	NP_000374
327	MKAVLRKAGGTGP	108	Ub	K	732	NP_001631
327	TGPGEEKQFLEVW	118	Ub	K	732	NP_001631
327	EKNRKLKSFNLSA	131	Ub	K	732	NP_001631
327	ESFFQTKALDVSA	180	Ub	K	732	NP_001631
327	TKALDVSASDDEI	185	pS_pT	S	732	NP_001631
327	ALDVSASDDEIAR	187	pS_pT	S	732	NP_001631
327	DEIARLKKPDQAI	195	Ub	K	732	NP_001631
327	RYIPQVKTPLLLM	664	Ub	K	732	NP_001631
327	DRRVPFKQGMEYY	681	Ub	K	732	NP_001631
328	%%%%MPKRGKKGA	3	Acc	K	318	NP_542380
328	%MPKRGKKGAVAE	6	Acc	K	318	NP_542380
328	MPKRGKKGAVAED	7	Acc	K	318	NP_542380
328	RTEPEAKKSKTAA	24	Ub	K	318	NP_542380
328	TEPEAKKSKTAAK	25	Ub	K	318	NP_542380
328	PEAKKSKTAAKKN	27	Acc	K	318	NP_542380
328	PEAKKSKTAAKKN	27	Ub	K	318	NP_542380
328	KSKTAAKKNDKEA	31	Acc	K	318	NP_542380
328	SKTAAKKNDKEAA	32	Acc	K	318	NP_542380
328	AAKKNDKEAAGEG	35	Acc	K	318	NP_542380
328	GEGPALYEDPPDQ	45	pY	Y	318	NP_542380
328	QYWSAPSDKEGYS	123	pS_pT	S	318	NP_542380
328	WSAPSDKEGYSGV	125	Ub	K	318	NP_542380
328	GLVRLEYRQRWDE	184	pY	Y	318	NP_542380
328	AFRKFLKGLASRK	197	Acc	K	318	NP_542380
328	KKNAGFTPQERQG	233	pS_pT	T	318	NP_542380
328	LYPNTPYAYTFWT	262	pY	Y	318	NP_542380
329	PSYQNIKSIMEDS	19	Ub	K	618	NP_001157
329	DWTNSNKQKMKYD	36	Ub	K	618	NP_001157
329	SNKQKMKYDFSCE	40	Ub	K	618	NP_001157
329	SLGSTSKNTSPMR	126	Ub	K	618	NP_001157
329	SFAHSLSPTLEHS	140	pS_pT	S	618	NP_001157
329	PTLEHSSLFSGSY	147	pS_pT	S	618	NP_001157
329	GSYSSLSPNPLNS	157	pS_pT	S	618	NP_001157
329	CFACGGKLSNWEP	226	Ub	K	618	NP_001157
329	LSNWEPKDDAMSE	233	Ub	K	618	NP_001157
329	EFLIRMKGQEFVD	340	Ub	K	618	NP_001157
329	FNRDLVKQTVQSK	410	Ub	K	618	NP_001157
329	KQTVQSKILTTGE	416	Ub	K	618	NP_001157
329	TTGENYKTVNDIV	425	Ub	K	618	NP_001157
329	LNAEDEKREEEKE	441	Ub	K	618	NP_001157
329	EKREEEKEKQAEE	446	Ub	K	618	NP_001157
329	REEEKEKQAEEMA	448	Ub	K	618	NP_001157
329	IDSTLYKNLFVDK	537	Ub	K	618	NP_001157
330	MNIVENSIFLSNL	7	pS_pT	S	604	NP_001156
330	ENSIFLSNLMKSA	11	pS_pT	S	604	NP_001156
331	NSFEGSKTCVPAD	10	Ub	K	497	NP_001158
331	EEFNRLKTFANFP	31	Ub	K	497	NP_001158
331	ANFPSGSPVSAST	40	pS_pT	S	497	NP_001158
331	GRHRKVSPNCRFI	87	pS_pT	S	497	NP_001158
331	IQNGQYKVENYLG	116	Ub	K	497	NP_001158
331	SETHADYLLRTGQ	139	pY	Y	497	NP_001158
331	SEEARLKSFQNWP	168	Ub	K	497	NP_001158
331	KWYPGCKYLLEQK	328	Ub	K	497	NP_001158
331	LVRTTEKTPSLTR	358	Ub	K	497	NP_001158
331	SQTSLQKEISTEE	433	Ub	K	497	NP_001158
332	LKDHRISTFKNWP	20	pS_pT	S	165	NP_001012271
332	KDHRISTFKNWPF	21	pS_pT	T	165	NP_001012271
332	LEGCACTPERMAE	34	pS_pT	T	165	NP_001012271
332	GFIHCPTENEPDL	48	pS_pT	T	165	NP_001012271
332	NKIAKETNNKKKE	140	pS_pT	T	165	NP_001012271
333	ELQRHGYENPTYR	639	pY	Y	651	NP_001019978
334	MSDKEITHDVKAV	303	pS_pT	T	763	NP_001633
334	RKRQYGTISHGIV	723	pS_pT	T	763	NP_001633
334	EVDPMLTPEERHL	736	pS_pT	T	763	NP_001633
334	EERHLNKMQNHGY	744	Ub	K	763	NP_001633
334	KMQNHGYENPTYK	750	pY	Y	763	NP_001633
334	GYENPTYKYLEQM	755	pY	Y	763	NP_001633
334	YENPTYKYLEQMQ	756	Ub	K	763	NP_001633
334	ENPTYKYLEQMQI	757	pY	Y	763	NP_001633
335	SGRDYVSQFEGSA	55	pS_pT	S	267	NP_000030
335	ELQEKLSPLGEEM	166	pS_pT	S	267	NP_000030
335	HVDALRTHLAPYS	185	pS_pT	T	267	NP_000030
335	THLAPYSDELRQR	191	pS_pT	S	267	NP_000030
335	EYHAKATEHLSTL	221	pS_pT	T	267	NP_000030
335	LESFKVSFLSALE	252	pS_pT	S	267	NP_000030
336	KEPCVESLVSQYF	32	pS_pT	S	100	NP_001634
336	CVESLVSQYFQTV	35	pS_pT	S	100	NP_001634
336	ESLVSQYFQTVTD	37	pY	Y	100	NP_001634
336	KSYFEKSKEQLTP	68	pS_pT	S	100	NP_001634
338	LKFIIPSPKRPVK	928	pS_pT	S	4563	NP_000375
338	AYNTKDKIGVELT	2004	Acc	K	4563	NP_000375
338	KAKFRETLEDTRD	2515	pS_pT	T	4563	NP_000375
[truncated: 98,392 more rows]

## Sheet: Collapsed_ID_Info
Representative EGID	All EGID	Acc	pS / pT	pY	Ub	PTM Total	Length	Complex Degree	Diff PTMs	TSG/OG
12820	-	6682	56251	13241	24217	100391	-	4143	12127	1078	Totals
2	2	1	1	3	0	5	1474	1	3	0
9	9	0	0	1	0	1	290	0	1	0
10	10	0	0	2	0	2	290	0	1	0
12	12	5	0	0	0	5	423	0	1	0
13	13	0	2	2	0	4	399	0	2	0
14	14	0	0	0	2	2	434	0	1	0
15	15	0	2	0	0	2	207	0	1	0
16	16	2	4	3	11	20	968	0	4	0
19	19	0	7	1	0	8	2261	0	2	0
20	20	0	9	4	3	16	2466	0	3	0
21	21	0	0	3	2	5	1704	0	2	0
22	22	2	2	2	0	6	753	0	3	0
23	23	0	12	1	6	19	845	0	3	0
24	24	0	4	1	0	5	2273	0	2	0
25	25	1	32	17	0	50	1149	6	3	0
27	27	0	39	15	0	54	1182	6	2	1
29	29	0	0	1	0	1	859	0	1	1
30	30	0	2	0	1	3	424	0	2	0
31	31	4	26	7	13	50	2383	0	4	0
32	32	1	3	1	0	5	2458	0	3	1
33	33	1	0	0	0	1	430	0	1	0
34	34	4	0	0	0	4	425	0	1	0
35	35	1	0	0	0	1	412	0	1	0
36	36	1	0	2	2	5	432	0	3	0
37	37	5	0	0	2	7	655	0	2	0
38	38	8	0	1	2	11	427	0	3	0
39	39	3	0	0	1	4	397	0	2	0
40	40	0	1	0	0	1	512	0	1	0
41	41	0	3	0	0	3	574	0	1	0
43	43	0	0	1	0	1	617	0	1	0
47	47	8	16	5	27	56	1101	0	4	0
48	48	0	3	2	16	21	889	0	3	0
50	50	5	1	1	1	8	780	0	4	0
51	51	6	3	4	0	13	660	0	3	0
52	52	1	1	5	1	8	158	1	4	0
58	58	6	5	10	10	31	377	9	4	0
59	59	6	6	6	9	27	377	3	4	0
60	60	5	11	11	10	37	375	44	4	1
70	70	6	4	6	10	26	377	0	4	1
71	71	5	9	11	11	36	375	6	4	0
72	72	6	4	6	9	25	376	2	4	0
81	81	5	8	5	10	28	911	2	4	0
86	86	0	1	1	6	8	429	62	3	0
87	87	5	4	4	3	16	914	3	4	0
88	88	0	2	0	1	3	894	5	2	0
89	89	0	1	0	0	1	901	2	1	0
90	90	0	4	0	0	4	509	8	1	0
91	91	0	0	1	0	1	505	10	1	0
92	92	0	0	0	1	1	513	13	1	0
93	93	0	0	0	0	0	512	13	0	0
94	94	0	1	0	0	1	503	17	1	0
95	95	0	0	0	1	1	408	0	1	0
97	97	0	0	0	3	3	99	0	1	0
100	100	4	0	3	1	8	363	0	3	0
102	102	0	0	0	1	1	748	0	1	0
103	103	0	11	0	4	15	1226	1	2	0
104	104	0	2	0	0	2	741	0	1	0
107	107	0	0	0	0	0	1119	2	0	0
108	108	0	0	0	0	0	1091	2	0	0
109	109	0	1	1	6	8	1144	2	3	0
111	111	0	2	0	0	2	1261	3	1	0
112	112	0	3	0	1	4	1168	2	2	0
113	113	2	0	0	2	4	1080	3	2	0
114	114	0	1	3	0	4	1251	2	2	0
115	115	0	9	0	2	11	1353	2	2	0
118	118	0	35	2	3	40	768	0	3	0
119	119	2	22	1	0	25	726	0	3	0
120	120	0	18	4	1	23	706	0	3	0
123	123	0	0	0	2	2	437	0	1	0
124	124	1	3	0	0	4	375	1	2	0
125	125	1	3	2	0	6	375	1	3	0
126	126	0	1	1	0	2	375	1	2	0
127	127	1	2	0	0	3	380	0	2	0
128	128	1	3	0	4	8	374	0	3	0
130	130	0	2	0	0	2	375	0	1	0
132	132	1	0	1	3	5	362	0	3	0
133	133	0	0	1	0	1	185	1	1	0
134	134	0	0	0	0	0	326	2	0	0
135	135	0	1	0	0	1	412	3	1	0
136	136	0	0	0	0	0	332	2	0	0
140	140	0	1	0	0	1	318	2	1	0
141	141	0	0	3	0	3	357	0	1	0
142	142	11	9	1	20	41	1014	18	4	1
143	143	0	11	0	12	23	1724	0	2	1
147	147	0	7	0	0	7	520	0	1	0
148	148	0	3	0	0	3	475	1	1	0
150	150	0	7	0	0	7	465	0	1	0
152	152	0	0	0	0	0	462	1	0	0
153	153	0	2	0	0	2	477	2	1	0
154	154	0	16	6	0	22	413	6	2	0
156	156	0	8	3	4	15	689	1	3	0
157	157	0	1	2	0	3	688	0	2	0
158	158	2	1	0	6	9	484	0	3	0
159	159	0	0	1	4	5	456	0	2	0
160	160	1	10	0	4	15	977	15	3	0
161	161	1	1	1	6	9	939	10	4	0
162	162	1	1	3	4	9	949	12	4	0
163	163	4	4	6	7	21	951	13	4	0
164	164	2	0	3	2	7	825	14	3	0
165	165	1	1	0	0	2	1158	0	2	0
166	166	0	1	0	4	5	264	2	2	0
174	174	1	0	0	0	1	609	0	1	0
175	175	0	0	1	0	1	346	0	1	0
176	176	0	0	0	0	0	2530	3	0	0
177	177	0	1	0	0	1	404	3	1	0
178	178	0	0	4	2	6	1532	0	2	0
181	181	0	0	0	0	0	132	1	0	0
182	182	0	0	2	1	3	1218	4	2	0
183	183	0	0	0	0	0	485	4	0	0
185	185	0	4	2	0	6	359	3	2	0
186	186	0	0	0	0	0	363	6	0	0
189	189	0	0	1	0	1	392	0	1	1
191	191	3	0	1	8	12	432	0	3	0
196	196	0	3	2	8	13	848	2	3	0
197	197	1	7	0	0	8	367	0	2	0
199	199	1	0	2	2	5	147	0	3	0
202	202	1	15	0	0	16	1723	0	2	0
203	203	0	0	0	1	1	194	0	1	0
204	204	1	0	2	3	6	239	1	3	0
205	205	1	0	1	0	2	223	0	2	0
207	207	0	9	5	4	18	480	9	3	0
208	208	0	8	2	3	13	481	2	3	1
211	211	0	0	1	3	4	640	0	2	1
212	212	0	1	0	0	1	587	0	1	0
213	213	28	6	8	1	43	609	0	4	0
214	214	0	0	2	4	6	583	0	2	0
215	215	0	1	0	1	2	745	1	2	1
216	216	10	3	2	0	15	501	0	3	0
217	217	2	1	1	2	6	517	0	4	0
218	218	4	0	2	0	6	453	0	2	0
219	219	1	1	1	1	4	517	0	4	0
220	220	0	3	1	15	19	512	0	3	0
221	221	0	1	0	5	6	468	0	2	0
222	222	0	2	0	0	2	385	0	1	0
223	223	1	2	1	6	10	518	0	4	0
224	224	0	0	0	7	7	508	0	1	0
225	225	1	0	0	0	1	740	0	1	0
226	226	6	10	5	19	40	364	0	4	0
229	229	1	4	0	1	6	364	0	3	0
230	230	2	4	1	7	14	364	0	4	0
231	231	4	1	3	3	11	316	0	4	0
238	238	0	4	13	0	17	1620	7	2	1
239	239	0	1	0	0	1	663	0	1	0
240	240	0	3	0	0	3	674	0	1	0
242	242	0	2	0	0	2	701	0	1	0
244	244	0	2	2	0	4	327	0	2	0
246	246	0	0	1	0	1	662	0	1	0
248	248	0	2	0	0	2	528	0	1	1
249	249	0	0	0	0	0	524	1	0	0
250	250	0	3	2	0	5	535	0	2	1
251	251	0	1	2	0	3	532	0	2	0
262	262	0	1	1	3	5	334	0	3	0
265	265	0	1	0	0	1	191	0	1	0
266	266	0	0	0	0	0	192	0	0	0
267	267	0	6	0	1	7	643	1	2	0
268	268	0	0	1	0	1	560	1	1	0
269	269	0	0	0	0	0	573	7	0	1
271	271	1	11	4	5	21	879	0	4	0
272	272	0	4	1	2	7	776	0	3	0
273	273	2	16	0	0	18	695	0	2	0
274	274	0	9	0	0	9	593	3	1	0
279	279	0	0	1	0	1	511	0	1	1
284	284	1	0	0	0	1	498	10	1	0
285	285	0	0	1	0	1	496	0	1	0
286	286	2	8	5	0	15	1897	1	3	0
287	287	1	43	4	1	49	3957	0	4	0
288	288	3	8	7	1	19	4377	2	4	0
290	290	0	3	1	0	4	967	0	2	0
291	291	3	3	3	9	18	298	0	4	0
292	292	8	4	3	15	30	298	1	4	0
293	293	6	2	3	15	26	298	0	4	0
301	301	6	10	6	17	39	346	0	4	0
302	302	10	13	13	15	51	357	0	4	1
306	306	0	0	1	6	7	323	0	2	1
307	307	4	3	2	2	11	321	0	4	0
308	308	5	1	3	13	22	320	0	4	0
309	309	13	2	6	9	30	673	1	4	0
310	310	1	0	0	3	4	488	0	2	0
311	311	3	1	3	4	11	505	0	4	1
316	316	0	0	1	0	1	1338	0	1	0
317	317	0	3	0	2	5	1248	5	2	0
320	320	0	4	3	0	7	837	2	2	1
321	321	0	5	1	0	6	749	0	2	0
322	322	0	5	2	1	8	710	2	3	0
323	323	0	4	0	1	5	736	0	2	0
324	324	0	65	6	0	71	2843	14	2	0
325	325	0	3	0	0	3	223	1	1	1
326	326	0	2	0	0	2	545	0	1	0
327	327	0	2	0	7	9	732	0	2	0
328	328	8	2	3	4	17	318	4	4	0
329	329	0	3	0	14	17	618	11	2	0
330	330	0	2	0	0	2	604	10	1	0
331	331	0	2	1	7	10	497	18	3	0
332	332	0	5	0	0	5	165	14	1	0
333	333	0	0	1	0	1	651	0	1	1
334	334	0	3	3	2	8	763	0	3	0
335	335	0	6	0	0	6	267	5	1	0
336	336	0	3	1	0	4	100	3	2	0
337	337	0	0	0	0	0	396	3	0	0
338	338	1	8	2	2	13	4563	5	4	0
339	339	0	2	0	0	2	236	0	1	0
344	344	0	0	0	0	0	101	3	0	0
345	345	0	0	0	0	0	99	3	0	0
348	348	0	3	0	0	3	317	3	1	0
351	351	0	7	4	2	13	770	4	3	0
353	353	1	6	1	3	11	180	0	4	1
355	355	0	6	3	3	12	335	22	3	0
356	356	0	0	0	0	0	281	16	0	1
357	357	3	13	0	0	16	1616	0	2	0
358	358	0	5	1	0	6	269	0	2	0
359	359	0	3	0	2	5	271	0	2	0
361	361	0	5	1	0	6	323	0	2	0
362	362	0	1	1	0	2	265	0	2	0
366	366	0	2	0	0	2	295	0	1	0
367	367	3	17	11	2	33	920	9	4	0
368	368	0	5	0	0	5	1503	0	1	1
369	369	0	44	6	0	50	606	0	2	0
372	372	4	3	1	16	24	511	4	4	1
373	373	0	0	2	0	2	574	0	1	0
374	374	0	0	1	0	1	252	4	1	0
375	375	1	2	1	4	8	181	10	4	0
377	377	1	2	1	4	8	181	0	4	1
378	378	1	1	0	6	8	180	0	3	0
379	379	0	0	0	3	3	201	0	1	0
381	381	1	0	0	3	4	180	0	2	0
382	382	1	0	1	3	5	175	3	3	0
383	383	1	3	0	0	4	322	0	2	0
384	384	1	1	0	0	2	354	0	2	1
387	387	0	1	3	3	7	193	7	3	0
388	388	0	1	3	0	4	196	0	2	1
389	389	0	2	3	1	6	193	0	3	1
390	390	0	2	0	0	2	244	0	1	1
391	391	0	1	0	3	4	191	2	2	1
392	392	2	5	1	4	12	439	0	4	0
393	393	0	4	3	1	8	946	0	3	0
394	394	0	15	5	0	20	1502	0	2	0
395	395	0	9	1	0	10	974	0	2	0
396	396	4	5	4	2	15	204	5	4	0
397	397	9	1	2	2	14	201	0	4	0
400	400	0	0	0	3	3	181	0	1	0
401	401	0	4	0	0	4	284	0	1	0
402	402	0	1	0	4	5	184	0	2	1
403	403	0	2	0	3	5	182	0	2	0
405	405	0	3	1	0	4	789	9	2	0
406	406	1	2	0	0	3	625	3	2	0
407	407	0	0	0	0	0	388	1	0	0
408	408	0	3	2	0	5	418	15	2	0
409	409	3	1	2	2	8	409	9	4	0
420	420	0	2	0	0	2	314	0	1	1
421	421	0	6	1	2	9	962	0	3	0
427	427	0	0	0	1	1	411	0	1	0
433	433	0	2	0	0	2	311	0	1	0
435	435	1	0	0	10	11	464	0	2	0
439	439	1	0	1	4	6	348	0	3	0
440	440	1	1	1	17	20	561	0	4	0
443	443	0	1	1	0	2	313	0	2	0
444	444	0	8	0	4	12	758	0	2	0
445	445	1	5	3	1	10	412	0	4	0
460	460	0	3	0	0	3	1294	0	1	0
462	462	0	3	0	0	3	464	0	1	0
463	463	0	17	1	0	18	3703	0	2	0
466	466	0	11	0	1	12	271	1	2	1
467	467	0	0	0	1	1	181	1	1	1
468	468	2	4	0	5	11	351	1	3	1
471	471	2	5	4	12	23	592	0	4	0
472	472	1	20	3	4	28	3056	17	4	0
473	473	1	28	1	3	33	1566	0	4	1
475	475	2	0	0	3	5	68	0	2	0
476	476	0	10	4	30	44	1023	1	3	0
477	477	0	7	0	9	16	1020	0	2	0
478	478	0	6	3	12	21	1013	0	3	0
479	479	1	4	0	3	8	1039	0	3	0
480	480	1	1	0	6	8	1029	0	3	0
481	481	0	0	1	0	1	303	2	1	0
482	482	0	0	0	0	0	290	3	0	0
483	483	0	0	0	7	7	279	2	1	0
486	486	0	0	0	0	0	145	1	0	0
487	487	0	1	2	6	9	1001	0	3	0
488	488	1	3	2	16	22	1042	0	4	0
489	489	0	1	0	3	4	1052	0	2	0
490	490	1	17	1	18	37	1220	0	4	0
491	491	1	10	1	5	17	1243	0	4	0
492	492	1	1	0	3	5	1220	0	3	0
493	493	0	3	1	15	19	1205	0	3	0
495	495	0	4	2	1	7	1035	0	3	0
498	498	9	2	0	12	23	553	3	3	0
501	501	1	3	0	4	8	539	0	3	0
506	506	4	10	4	9	27	529	3	4	0
509	509	3	2	0	6	11	298	4	3	0
513	513	0	0	0	0	0	168	3	0	0
514	514	1	0	0	1	2	51	3	2	0
515	515	3	0	1	6	10	256	3	3	0
516	516	0	0	0	0	0	136	3	0	0
521	521	0	0	2	0	2	69	3	1	0
522	522	5	0	0	4	9	116	3	2	0
523	523	2	1	1	14	18	617	2	4	0
525	525	0	2	0	0	2	513	0	1	0
526	526	0	4	0	2	6	511	2	2	0
527	527	0	0	0	0	0	155	2	0	0
528	528	0	1	1	3	5	382	2	3	0
529	529	0	0	2	2	4	226	2	2	0
533	533	0	0	0	0	0	205	2	0	0
535	535	0	1	1	6	8	838	1	3	0
537	537	0	1	0	2	3	470	0	2	0
538	538	0	21	1	0	22	1500	0	2	0
539	539	7	0	2	15	24	213	2	3	0
540	540	0	4	0	3	7	1465	0	2	0
545	545	0	8	4	9	21	2644	14	3	0
546	546	8	62	3	6	79	2492	0	4	1
547	547	0	5	2	1	8	1690	0	3	0
550	550	0	10	0	6	16	410	0	2	0
551	551	0	0	0	0	0	164	2	0	0
552	552	0	3	1	0	4	418	0	2	0
553	553	0	0	1	0	1	424	0	1	0
554	554	0	4	2	0	6	371	1	2	0
558	558	0	4	9	5	18	894	0	3	0
563	563	0	0	1	0	1	298	0	1	1
567	567	0	0	0	0	0	119	25	0	0
570	570	1	0	0	0	1	418	0	1	0
571	571	0	5	1	0	6	736	5	2	0
572	572	1	14	2	0	17	168	4	3	0
573	573	0	1	0	1	2	345	0	2	1
575	575	0	2	0	0	2	1584	0	1	1
576	576	0	0	3	0	3	1585	0	1	1
577	577	0	4	0	0	4	1522	0	1	0
578	578	0	0	2	0	2	211	1	1	0
579	579	0	0	0	0	0	333	2	0	1
580	580	2	13	0	2	17	777	21	3	0
581	581	0	4	0	2	6	218	3	2	1
582	582	0	4	0	1	5	593	0	2	1
583	583	0	0	0	5	5	721	0	1	0
585	585	0	0	0	3	3	519	0	1	0
587	587	3	0	0	3	6	392	0	2	0
593	593	0	5	2	0	7	445	2	2	0
594	594	1	2	2	0	5	392	2	3	0
595	595	0	5	1	6	12	295	12	3	0
596	596	0	6	1	0	7	239	7	2	1
598	598	0	4	0	2	6	233	6	2	1
599	599	0	3	0	0	3	193	0	1	0
602	602	0	2	0	2	4	454	1	2	0
604	604	1	2	0	1	4	706	3	3	1
605	605	0	3	0	2	5	231	0	2	1
607	607	0	13	0	0	13	1426	2	1	0
608	608	0	0	0	1	1	184	3	1	0
610	610	0	4	2	1	7	889	0	3	0
613	613	0	16	19	1	36	1271	2	3	0
617	617	0	0	1	3	4	419	0	2	1
622	622	0	0	1	0	1	343	0	1	0
623	623	0	1	0	0	1	353	0	1	0
624	624	0	6	4	0	10	391	0	2	0
627	627	0	0	1	0	1	329	5	1	0
631	631	0	1	0	0	1	665	0	1	0
632	632	0	0	0	0	0	100	4	0	0
633	633	0	0	0	0	0	368	7	0	0
634	634	0	5	2	0	7	526	0	2	0
635	635	1	0	0	0	1	406	0	1	1
636	636	0	4	4	0	8	975	0	2	0
637	637	0	3	1	1	5	241	0	3	0
638	638	0	2	0	1	3	160	1	2	0
640	640	0	0	6	0	6	505	0	1	1
641	641	3	39	1	0	43	1417	20	3	0
642	642	2	1	1	6	10	455	0	4	1
644	644	3	5	5	6	19	296	0	4	0
645	645	0	1	0	1	2	206	0	2	0
646	646	0	2	0	0	2	994	0	1	0
648	648	0	3	0	0	3	326	10	1	0
649	649	0	1	3	0	4	986	0	2	1
650	650	0	0	0	0	0	396	21	0	0
651	651	0	0	0	0	0	472	7	0	1
652	652	0	0	0	1	1	408	10	1	0
653	653	0	1	0	0	1	454	8	1	0
654	654	0	0	0	0	0	513	8	0	0
655	655	0	0	0	1	1	431	11	1	0
656	656	0	0	0	0	0	402	7	0	0
657	657	0	4	0	1	5	532	26	2	0
658	658	0	0	0	0	0	502	26	0	1
659	659	0	12	3	0	15	1038	30	2	1
660	660	0	0	5	1	6	675	0	2	0
661	661	0	2	0	1	3	398	4	2	0
662	662	2	0	0	3	5	271	0	2	0
663	663	0	3	1	1	5	435	5	3	0
664	664	0	5	0	1	6	194	0	2	0
665	665	0	8	0	1	9	219	0	2	1
666	666	0	1	0	1	2	212	0	2	0
667	667	2	20	4	1	27	5171	2	4	0
668	668	0	1	2	0	3	376	0	2	0
669	669	0	0	1	1	2	259	0	2	0
670	670	2	0	0	2	4	291	0	2	0
672	672	0	51	0	3	54	1884	43	2	0
673	673	1	28	1	0	30	766	8	3	1
675	675	1	13	1	1	16	3418	12	4	1
676	676	1	6	4	0	11	947	0	3	1
677	677	0	5	1	2	8	338	1	3	0
678	678	0	6	0	0	6	494	0	1	0
682	682	0	3	0	9	12	385	4	2	0
684	684	0	0	2	1	3	180	0	2	1
685	685	0	0	0	0	0	178	3	0	0
687	687	0	0	0	1	1	244	0	1	0
688	688	1	2	1	1	5	457	0	4	0
689	689	0	2	0	6	8	206	0	2	1
694	694	0	2	0	0	2	171	0	1	0
695	695	0	13	10	3	26	659	5	3	0
699	699	0	21	2	0	23	1085	1	2	0
701	701	1	14	1	4	20	1050	8	4	0
705	705	1	3	1	2	7	437	0	4	0
708	708	2	2	1	2	7	282	7	4	0
710	710	0	1	0	0	1	500	0	1	0
712	712	0	0	0	0	0	245	3	0	0
713	713	0	0	0	0	0	253	3	0	0
714	714	0	0	0	0	0	245	3	0	0
715	715	0	1	2	0	3	705	1	2	0
716	716	1	0	0	0	1	688	1	1	0
717	717	0	0	0	0	0	752	2	0	0
718	718	0	6	1	1	8	1663	4	3	0
720	720	0	1	0	0	1	1744	2	1	1
721	721	0	1	0	0	1	1744	2	1	0
726	726	0	0	0	1	1	639	0	1	0
727	727	0	0	0	0	0	1676	3	0	0
728	728	0	6	2	0	8	350	0	2	1
729	729	0	1	0	0	1	934	5	1	0
730	730	0	0	0	0	0	843	5	0	0
731	731	0	1	1	0	2	584	5	2	0
732	732	0	3	0	0	3	591	5	1	0
733	733	0	0	0	0	0	202	5	0	0
734	734	0	0	0	1	1	549	0	1	0
735	735	0	1	0	0	1	559	2	1	0
738	738	0	4	2	2	8	782	0	3	0
740	740	0	2	0	0	2	166	2	1	0
741	741	0	2	0	2	4	403	0	2	0
745	745	1	0	0	1	2	1151	0	2	0
747	747	0	3	3	0	6	1042	0	2	0
752	752	0	5	0	8	13	1100	0	2	0
754	754	0	0	2	2	4	180	0	2	0
755	755	0	5	0	1	6	256	0	2	0
760	760	0	0	0	6	6	260	0	1	0
761	761	1	0	0	0	1	260	0	1	0
762	762	0	4	0	0	4	312	0	1	0
763	763	0	0	0	1	1	305	0	1	0
767	767	0	0	0	1	1	290	0	1	0
768	768	0	1	1	0	2	459	0	2	0
771	771	0	0	1	0	1	354	0	1	1
773	773	0	6	4	2	12	2512	3	3	1
774	774	0	7	2	3	12	2339	1	3	0
775	775	0	6	2	0	8	2221	1	2	0
776	776	0	4	2	0	6	2181	1	2	0
777	777	0	7	1	1	9	2270	2	3	0
778	778	0	1	0	0	1	1977	0	1	0
779	779	0	5	4	0	9	1873	0	2	0
780	780	0	2	10	2	14	919	0	3	0
781	781	0	1	2	0	3	1091	1	2	0
782	782	0	3	0	0	3	598	0	1	0
783	783	0	6	0	0	6	660	2	1	0
784	784	0	0	4	0	4	484	4	1	0
785	785	0	7	2	0	9	520	1	2	0
788	788	0	0	0	1	1	301	0	1	0
790	790	2	13	3	23	41	2225	0	4	0
794	794	0	0	3	0	3	271	0	1	0
796	796	0	0	0	0	0	141	2	0	0
797	797	0	0	0	0	0	127	1	0	0
799	799	0	0	0	0	0	508	1	0	0
800	800	2	19	2	0	23	793	1	3	0
811	811	9	0	0	7	16	417	6	2	0
813	813	0	3	3	6	12	315	0	3	0
814	814	2	8	0	0	10	473	2	2	0
815	815	0	13	1	1	15	489	5	3	0
816	816	0	11	1	1	13	666	3	3	0
817	817	0	20	1	2	23	499	6	3	0
818	818	0	19	1	1	21	556	1	3	0
819	819	2	1	0	1	4	296	0	3	0
821	821	2	4	0	15	21	592	1	3	0
822	822	0	1	0	1	2	348	0	2	0
823	823	1	6	2	14	23	714	1	4	1
824	824	1	5	0	7	13	700	1	3	0
826	826	1	1	0	3	5	268	0	3	0
828	828	0	1	0	0	1	189	0	1	0
829	829	3	1	1	12	17	286	1	4	0
830	830	3	1	1	8	13	286	2	4	0
831	831	3	24	2	1	30	750	0	4	0
832	832	1	2	1	4	8	272	2	4	0
833	833	1	6	2	2	11	831	0	4	0
834	834	0	1	0	0	1	404	4	1	1
835	835	0	3	0	3	6	452	4	2	0
836	836	1	2	0	2	5	277	3	3	0
837	837	0	1	0	0	1	377	0	1	0
838	838	0	0	0	0	0	447	1	0	0
839	839	0	1	0	1	2	293	0	2	0
840	840	0	6	0	0	6	336	2	1	0
841	841	1	5	3	3	12	538	24	4	0
842	842	0	9	1	0	10	416	7	2	1
843	843	0	1	1	0	2	522	16	2	0
844	844	0	0	1	0	1	396	0	1	0
845	845	0	3	0	0	3	399	0	1	0
846	846	0	6	0	0	6	1078	0	1	0
847	847	3	4	4	4	15	527	0	4	0
857	857	1	6	4	7	18	178	13	4	0
858	858	0	8	2	0	10	162	1	2	1
860	860	0	13	0	1	14	521	2	2	1
861	861	2	13	0	2	17	480	0	3	1
862	862	0	5	1	0	6	604	0	2	1
863	863	0	2	0	1	3	653	0	2	0
864	864	3	8	0	3	14	429	1	3	1
865	865	1	1	0	0	2	187	1	2	1
867	867	1	11	10	0	22	906	54	3	0
868	868	0	8	4	0	12	982	7	2	1
871	871	0	1	0	7	8	418	0	2	1
873	873	0	3	2	3	8	277	0	3	0
874	874	0	0	1	1	2	277	0	2	0
875	875	0	2	0	1	3	551	0	2	0
883	883	0	2	0	0	2	422	0	1	0
885	885	0	0	0	0	0	115	1	0	0
887	887	0	6	1	0	7	447	0	2	0
889	889	0	0	2	0	2	736	0	1	0
890	890	4	4	1	2	11	432	11	4	0
891	891	1	9	1	3	14	433	13	4	1
892	892	0	6	1	3	10	283	27	3	0
894	894	0	3	0	3	6	289	2	2	1
896	896	0	5	0	0	5	292	6	1	1
898	898	0	11	0	0	11	410	8	1	1
899	899	0	0	0	2	2	786	1	1	0
900	900	0	0	0	0	0	295	1	0	0
901	901	0	2	0	0	2	344	0	1	1
902	902	0	6	0	0	6	323	23	1	0
904	904	3	6	0	0	9	726	16	2	0
905	905	0	15	0	0	15	730	4	1	0
908	908	6	1	1	15	23	531	5	4	0
909	909	0	0	0	0	0	327	0	0	0
912	912	0	1	0	0	1	335	0	1	0
915	915	0	0	2	0	2	171	23	1	0
916	916	0	1	2	0	3	207	23	2	0
917	917	0	2	2	0	4	182	23	2	0
919	919	0	3	7	0	10	164	23	2	0
920	920	0	2	0	0	2	458	14	1	0
921	921	0	8	2	0	10	495	0	2	1
923	923	0	1	3	0	4	668	0	2	0
924	924	0	1	2	0	3	240	0	2	0
925	925	0	0	0	0	0	235	7	0	0
926	926	0	0	1	0	1	210	8	1	0
928	928	0	0	0	5	5	228	5	1	0
929	929	0	0	0	0	0	375	7	0	0
930	930	0	4	7	0	11	556	7	2	0
931	931	0	12	0	0	12	297	2	1	0
933	933	0	0	4	0	4	847	0	1	0
939	939	0	1	0	0	1	260	0	1	0
940	940	0	2	4	0	6	220	7	2	0
941	941	0	0	0	0	0	288	6	0	0
942	942	0	0	1	0	1	329	8	1	0
943	943	0	4	2	0	6	595	0	2	0
945	945	0	1	2	2	5	364	0	3	0
947	947	0	0	3	0	3	385	0	1	0
948	948	0	1	0	2	3	472	1	2	0
949	949	0	3	2	5	10	509	0	3	0
950	950	0	1	1	0	2	478	0	2	0
953	953	0	0	2	0	2	517	0	1	0
955	955	0	1	0	2	3	484	0	2	0
958	958	0	2	0	0	2	277	13	1	0
959	959	0	1	0	0	1	261	13	1	0
960	960	0	10	0	5	15	742	5	2	0
961	961	0	0	0	3	3	323	14	1	0
963	963	0	0	0	0	0	219	1	0	0
965	965	0	1	0	0	1	248	0	1	0
966	966	0	0	2	0	2	128	1	1	1
967	967	0	0	0	3	3	238	3	1	1
970	970	0	0	0	1	1	193	0	1	0
971	971	0	0	0	0	0	359	1	0	0
972	972	0	4	0	4	8	296	1	2	0
973	973	0	1	4	0	5	226	9	2	0
974	974	0	0	2	1	3	230	9	2	0
975	975	0	0	0	5	5	236	4	1	0
976	976	0	4	1	1	6	835	0	3	1
977	977	0	0	0	4	4	253	5	1	0
983	983	2	10	6	17	35	297	20	4	0
984	984	1	22	5	7	35	782	3	4	1
987	987	2	26	5	11	44	2863	0	4	0
988	988	1	22	4	5	32	802	7	4	0
989	989	4	5	3	1	13	437	1	4	1
990	990	3	9	0	2	14	560	19	3	0
991	991	0	11	0	14	25	499	14	2	0
993	993	0	13	0	1	14	524	1	2	0
994	994	0	31	0	8	39	580	0	2	1
995	995	0	21	0	1	22	473	0	2	0
996	996	0	35	1	12	48	830	22	3	0
997	997	0	6	1	3	10	236	3	3	0
998	998	2	0	3	6	11	191	19	3	0
999	999	0	13	4	2	19	882	22	3	1
1000	1000	0	1	6	1	8	906	8	3	1
1001	1001	0	0	3	3	6	829	0	2	0
1002	1002	0	2	3	0	5	916	2	2	0
1003	1003	0	1	4	0	5	784	8	2	1
1004	1004	0	0	1	0	1	790	0	1	0
1005	1005	0	0	1	0	1	785	0	1	0
1006	1006	0	0	1	0	1	799	0	1	0
1008	1008	0	2	3	0	5	788	0	2	0
1009	1009	0	2	2	0	4	796	0	2	0
1010	1010	0	1	0	0	1	794	0	1	1
1013	1013	0	0	0	1	1	814	1	1	0
1015	1015	0	2	0	0	2	832	0	1	0
1016	1016	0	0	1	1	2	790	0	2	1
1017	1017	1	6	5	12	24	298	26	4	0
1018	1018	0	4	3	1	8	305	0	3	1
1019	1019	1	2	1	6	10	303	13	4	0
1020	1020	1	5	4	2	12	292	9	4	0
1021	1021	2	11	2	6	21	326	7	4	0
1022	1022	0	8	1	4	13	346	23	3	1
1024	1024	0	2	0	0	2	464	30	1	0
1025	1025	2	11	2	10	25	372	18	4	0
1026	1026	4	8	0	6	18	164	12	3	0
1027	1027	0	9	3	3	15	198	6	3	1
1028	1028	0	2	0	0	2	316	0	1	1
1029	1029	0	4	0	0	4	156	4	1	1
1031	1031	0	0	0	1	1	168	0	1	1
1032	1032	0	2	0	0	2	166	0	1	1
1033	1033	0	0	0	2	2	212	0	1	0
1036	1036	0	1	0	0	1	200	0	1	0
1039	1039	0	4	2	0	6	454	0	2	0
1040	1040	0	0	0	1	1	461	0	1	0
1044	1044	0	0	0	0	0	265	1	0	0
1045	1045	0	2	0	0	2	313	0	1	1
1047	1047	0	3	0	0	3	610	0	1	1
1050	1050	1	4	0	2	7	358	2	3	0
1051	1051	3	6	2	0	11	345	4	3	1
1052	1052	1	0	0	0	1	269	0	1	1
1053	1053	0	2	1	0	3	281	1	2	1
1054	1054	0	0	0	2	2	150	0	1	0
1056	1056	0	1	0	0	1	756	0	1	0
1058	1058	0	6	0	0	6	140	8	1	0
1059	1059	0	5	1	2	8	599	2	3	0
1060	1060	0	33	1	5	39	943	6	3	0
1062	1062	0	19	1	1	21	2701	1	3	0
1063	1063	4	66	6	9	85	3114	1	4	0
1066	1066	2	0	0	0	2	568	0	1	0
1068	1068	0	1	0	0	1	172	0	1	0
1069	1069	0	4	0	3	7	172	6	2	0
1070	1070	0	0	0	2	2	167	0	1	0
1072	1072	10	8	6	12	36	166	1	4	0
1073	1073	4	4	4	7	19	166	0	4	1
1080	1080	0	21	2	0	23	1480	4	2	0
1081	1081	0	1	0	0	1	116	5	1	0
1084	1084	0	0	1	0	1	252	0	1	0
1087	1087	0	0	1	0	1	265	0	1	0
1101	1101	0	0	0	0	0	359	1	0	0
1103	1103	3	7	0	0	10	748	0	2	0
1104	1104	0	9	1	4	14	452	0	3	0
1105	1105	2	37	1	0	40	1710	0	3	0
1106	1106	0	13	4	0	17	1828	0	2	0
1107	1107	5	23	1	3	32	2059	16	4	0
1108	1108	9	41	3	13	66	1912	26	4	0
1109	1109	3	0	3	0	6	323	0	2	0
1111	1111	0	14	0	6	20	476	2	2	0
1112	1112	0	4	0	0	4	490	0	1	0
1113	1113	0	12	1	0	13	457	0	2	0
1114	1114	1	20	7	0	28	677	0	3	0
1116	1116	0	0	3	0	3	383	0	1	0
1117	1117	0	0	1	0	1	390	0	1	0
1119	1119	0	0	2	1	3	457	0	2	0
1120	1120	0	3	0	0	3	395	0	1	0
1121	1121	0	3	3	0	6	653	0	2	0
1122	1122	0	1	0	0	1	656	0	1	0
1124	1124	0	3	3	0	6	468	0	2	0
1128	1128	0	4	0	0	4	460	2	1	0
1129	1129	0	21	1	0	22	466	0	2	0
1130	1130	2	9	1	2	14	3801	0	4	0
1131	1131	0	0	1	0	1	590	0	1	0
1132	1132	0	3	0	0	3	479	0	1	0
1133	1133	0	2	0	0	2	532	0	1	0
1134	1134	0	0	0	0	0	482	1	0	0
1136	1136	0	0	2	0	2	505	2	1	0
1137	1137	0	3	0	0	3	627	0	1	0
1138	1138	0	0	0	8	8	468	1	1	0
1139	1139	0	0	2	0	2	502	0	1	0
1140	1140	0	0	1	0	1	501	1	1	0
1143	1143	0	0	0	0	0	498	2	0	0
1144	1144	0	0	2	0	2	517	0	1	0
1146	1146	0	1	2	0	3	517	2	2	0
1147	1147	0	4	0	1	5	745	29	2	0
1149	1149	0	0	3	0	3	219	0	1	1
1152	1152	0	4	2	8	14	381	2	3	0
1153	1153	0	2	6	1	9	172	1	3	0
1154	1154	0	0	0	0	0	275	1	0	0
1155	1155	1	5	4	4	14	244	0	4	0
1158	1158	0	0	3	0	3	381	0	1	0
1161	1161	0	0	1	1	2	396	4	2	0
1163	1163	0	0	3	1	4	79	7	2	0
1164	1164	1	0	2	1	4	79	0	3	1
1173	1173	0	5	1	11	17	435	24	3	0
1174	1174	0	1	0	5	6	158	2	2	0
1175	1175	0	1	0	6	7	142	13	2	0
1176	1176	0	1	0	6	7	193	2	2	0
1179	1179	0	0	2	0	2	914	0	1	0
1180	1180	0	4	0	0	4	988	0	1	0
1181	1181	0	1	0	1	2	898	0	2	0
1182	1182	0	2	0	0	2	866	0	1	0
1184	1184	0	0	1	2	3	816	0	2	0
1185	1185	0	0	0	1	1	869	0	1	0
1186	1186	0	5	0	2	7	805	0	2	0
1187	1187	0	1	0	0	1	687	0	1	0
1191	1191	0	5	0	0	5	501	0	1	0
1192	1192	5	2	1	9	17	241	0	4	1
1193	1193	0	0	1	1	2	247	0	2	0
1195	1195	0	11	2	0	13	484	0	2	0
1196	1196	0	9	8	0	17	498	0	2	0
1198	1198	0	12	2	1	15	638	0	3	0
1200	1200	0	1	0	0	1	563	0	1	0
1201	1201	0	3	0	1	4	438	0	2	0
1203	1203	0	0	0	2	2	407	0	1	0
1207	1207	0	5	6	3	14	237	7	3	0
1209	1209	0	2	0	8	10	669	0	2	0
1211	1211	0	3	3	1	7	248	20	3	0
1212	1212	0	2	1	0	3	229	7	2	0
1213	1213	8	6	10	31	55	1675	18	4	0
1215	1215	0	0	2	0	2	247	0	1	0
1230	1230	0	1	1	0	2	355	0	2	0
1232	1232	0	0	0	0	0	376	2	0	0
1234	1234	0	4	1	0	5	352	1	2	0
1236	1236	0	10	0	0	10	378	0	1	0
1238	1238	0	1	0	0	1	384	1	1	1
1240	1240	0	3	0	0	3	373	0	1	0
1241	1241	0	2	0	0	2	352	0	1	0
1244	1244	0	6	2	12	20	1545	0	3	0
1260	1260	0	0	3	0	3	664	0	1	0
1261	1261	3	0	0	0	3	694	0	1	0
1263	1263	0	1	0	0	1	646	0	1	0
1264	1264	0	0	2	0	2	297	0	1	0
1265	1265	2	1	4	3	10	309	0	4	0
1266	1266	0	7	6	4	17	329	2	3	0
1267	1267	1	6	2	8	17	421	0	4	0
1268	1268	0	2	0	0	2	472	0	1	0
1269	1269	0	4	0	0	4	360	0	1	0
1270	1270	0	0	0	0	0	200	1	0	0
1271	1271	0	0	0	0	0	372	7	0	0
1272	1272	0	0	0	0	0	1018	1	0	0
1277	1277	0	2	0	0	2	1464	17	1	0
1278	1278	1	0	0	0	1	1366	16	1	0
1280	1280	0	0	0	0	0	1487	9	0	0
1281	1281	1	2	1	0	4	1466	4	3	0
1282	1282	0	0	1	0	1	1669	5	1	0
1284	1284	0	1	1	0	2	1712	5	2	0
1285	1285	0	3	0	1	4	1670	9	2	0
1286	1286	0	4	2	1	7	1690	7	3	0
1287	1287	0	1	0	0	1	1691	9	1	0
1288	1288	0	0	0	0	0	1691	5	0	0
1289	1289	2	1	0	1	4	1838	4	3	0
1290	1290	0	0	0	0	0	1499	4	0	0
1291	1291	1	0	0	1	2	1028	9	2	0
1292	1292	0	3	2	5	10	1019	9	3	0
1293	1293	0	0	1	0	1	3177	7	1	0
1294	1294	0	3	1	0	4	2944	4	2	0
1295	1295	0	0	0	0	0	744	3	0	0
1296	1296	0	0	0	0	0	703	3	0	0
1297	1297	0	0	0	0	0	921	4	0	0
1298	1298	0	0	0	0	0	689	4	0	0
1299	1299	0	0	0	0	0	684	4	0	0
1300	1300	0	0	0	0	0	680	3	0	0
1301	1301	0	0	0	0	0	1818	6	0	0
1302	1302	0	1	1	0	2	1736	6	2	0
1303	1303	0	3	0	0	3	3063	3	1	0
1306	1306	0	0	0	0	0	1388	3	0	0
1307	1307	1	0	0	0	1	1604	3	1	0
1308	1308	0	12	4	2	18	1497	5	3	0
1310	1310	0	1	2	0	3	1142	3	2	0
1312	1312	0	1	2	5	8	271	0	3	0
1314	1314	0	6	3	27	36	1233	9	3	0
1315	1315	0	7	2	7	16	953	4	3	0
1316	1316	3	0	0	1	4	283	0	2	0
1325	1325	0	0	0	0	0	105	8	0	1
1326	1326	0	7	0	0	7	467	5	1	0
1327	1327	3	2	0	6	11	169	1	3	1
1329	1329	1	1	0	3	5	129	1	3	0
1337	1337	0	0	0	1	1	109	1	1	0
1340	1340	0	0	0	3	3	86	1	1	0
1345	1345	0	0	1	1	2	75	1	2	0
1347	1347	0	0	0	2	2	115	0	1	0
1349	1349	0	0	0	1	1	80	1	1	0
1350	1350	0	0	0	2	2	63	1	1	0
1351	1351	0	0	0	0	0	69	1	0	0
1353	1353	0	0	0	1	1	276	0	1	0
1355	1355	0	0	0	2	2	410	0	1	0
1356	1356	0	2	3	0	5	1065	0	2	0
1361	1361	0	0	2	0	2	423	0	1	0
1362	1362	0	4	2	1	7	1380	0	3	0
1363	1363	0	0	0	6	6	476	0	1	0
1364	1364	0	1	3	0	4	209	0	2	0
1365	1365	0	3	3	0	6	220	0	2	0
1366	1366	0	1	1	1	3	211	0	3	0
1369	1369	0	0	1	0	1	458	0	1	0
1371	1371	1	0	0	5	6	454	0	2	0
1373	1373	1	8	3	1	13	1506	0	4	0
1374	1374	0	4	2	8	14	773	0	3	0
1375	1375	1	0	1	0	2	772	0	2	0
1376	1376	4	3	1	0	8	658	0	3	0
1378	1378	0	0	1	0	1	2489	0	1	0
1380	1380	0	0	2	0	2	1092	1	1	0
1381	1381	0	1	0	0	1	137	0	1	0
1382	1382	0	0	0	7	7	138	0	1	0
1384	1384	3	0	3	0	6	626	0	2	0
1385	1385	0	15	0	2	17	341	3	2	0
1386	1386	2	17	0	1	20	505	11	3	1
1387	1387	18	20	5	1	44	2442	57	4	0
1390	1390	0	12	0	0	12	300	1	1	1
1392	1392	0	0	0	0	0	196	1	0	0
1394	1394	0	2	0	0	2	444	0	1	0
1396	1396	2	0	2	0	4	77	0	2	0
1397	1397	2	5	6	0	13	208	0	3	0
1398	1398	0	7	6	0	13	304	32	2	0
1399	1399	0	8	6	1	15	303	16	3	1
1400	1400	0	7	2	0	9	686	2	2	1
1401	1401	0	0	0	0	0	224	1	0	0
1404	1404	0	0	2	0	2	354	0	1	0
1406	1406	0	0	2	0	2	299	0	1	0
1407	1407	1	1	2	2	6	586	4	4	0
1408	1408	0	2	0	2	4	614	2	2	0
1409	1409	4	4	0	0	8	173	0	2	0
1410	1410	1	7	0	0	8	175	1	2	0
1411	1411	3	2	2	0	7	215	0	3	0
1412	1412	0	1	0	0	1	197	0	1	0
1413	1413	0	2	0	0	2	196	0	1	0
1414	1414	2	2	0	0	4	252	0	2	0
1415	1415	2	1	0	0	3	205	0	2	0
1417	1417	1	0	1	0	2	211	0	2	0
1419	1419	0	0	2	0	2	175	0	1	0
1420	1420	0	0	2	0	2	174	0	1	0
1429	1429	2	1	1	3	7	329	0	4	0
1431	1431	7	2	1	5	15	466	1	4	0
1432	1432	2	9	3	2	16	360	3	4	0
1434	1434	3	0	0	7	10	971	0	2	1
1435	1435	0	1	0	0	1	554	0	1	0
1436	1436	0	5	9	4	18	972	48	3	0
1437	1437	0	0	0	0	0	144	20	0	1
1438	1438	0	0	0	0	0	434	23	0	0
1439	1439	0	2	8	0	10	897	54	2	0
1440	1440	0	0	0	0	0	207	2	0	0
1441	1441	0	0	4	4	8	863	6	2	1
1442	1442	0	0	0	0	0	256	15	0	0
1443	1443	0	0	0	0	0	217	2	0	0
1445	1445	0	1	4	1	6	450	9	3	0
1446	1446	0	8	0	0	8	185	0	1	0
1447	1447	0	5	0	0	5	226	0	1	0
1452	1452	1	12	2	8	23	365	5	4	0
1453	1453	1	24	0	2	27	415	7	3	0
1454	1454	1	18	0	4	23	416	6	3	0
1455	1455	0	6	1	0	7	415	0	2	0
1456	1456	0	10	1	1	12	455	0	3	0
1457	1457	1	10	4	7	22	391	5	4	0
1459	1459	1	5	3	1	10	350	5	4	0
1460	1460	1	9	2	3	15	215	9	4	0
1462	1462	1	5	1	1	8	3396	4	4	0
1463	1463	0	2	0	0	2	1321	3	1	0
1464	1464	0	2	0	0	2	2322	2	1	0
1465	1465	3	1	5	1	10	193	0	4	0
1466	1466	0	0	4	2	6	193	0	2	0
1469	1469	0	0	2	0	2	141	0	1	0
1472	1472	0	5	0	0	5	141	0	1	0
1475	1475	0	0	0	1	1	98	0	1	0
1476	1476	2	2	2	3	9	98	0	4	0
1477	1477	0	0	2	1	3	431	11	2	0
1478	1478	0	11	1	2	14	577	11	3	0
1479	1479	0	3	1	4	8	717	10	3	0
1482	1482	0	1	0	0	1	324	4	1	0
1487	1487	0	5	0	2	7	440	21	2	0
1488	1488	0	5	2	2	9	985	4	3	0
1490	1490	0	0	0	0	0	349	2	0	0
1491	1491	0	3	0	2	5	405	0	2	1
1493	1493	0	0	2	0	2	223	4	1	0
1495	1495	3	14	6	14	37	906	21	4	0
1496	1496	1	14	1	1	17	905	3	4	1
1499	1499	3	22	10	13	48	781	66	4	0
1500	1500	2	53	24	12	91	968	10	4	1
1501	1501	0	10	6	1	17	1225	1	3	1
1503	1503	4	13	4	7	28	591	0	4	0
1508	1508	0	0	1	3	4	339	0	2	0
1509	1509	0	0	0	5	5	412	0	1	0
1512	1512	0	0	0	1	1	335	0	1	0
1514	1514	0	0	0	2	2	333	0	1	0
1519	1519	0	0	1	0	1	321	0	1	0
1521	1521	0	0	0	1	1	376	0	1	0
1523	1523	0	21	1	4	26	1505	0	3	0
1525	1525	3	7	2	2	14	365	0	4	1
1527	1527	0	2	0	0	2	410	0	1	0
1528	1528	2	0	0	2	4	134	1	2	0
1534	1534	0	0	0	1	1	251	0	1	0
1535	1535	0	2	0	4	6	195	2	2	0
1536	1536	0	0	0	1	1	570	3	1	1
1537	1537	0	0	0	3	3	325	1	1	0
1538	1538	6	7	1	0	14	651	0	3	0
1540	1540	0	9	0	0	9	956	0	1	0
1543	1543	0	1	0	0	1	512	0	1	1
1544	1544	0	1	0	0	1	516	0	1	0
1545	1545	0	0	0	3	3	543	0	1	0
1548	1548	0	1	0	0	1	494	0	1	0
1553	1553	0	1	0	0	1	494	0	1	0
1555	1555	0	1	0	0	1	491	0	1	0
1557	1557	0	2	0	0	2	490	0	1	0
1558	1558	0	0	1	0	1	490	0	1	0
1559	1559	1	1	0	0	2	490	0	2	0
1562	1562	0	1	0	0	1	490	0	1	0
1565	1565	0	1	0	0	1	497	0	1	0
1571	1571	0	1	0	0	1	493	0	1	0
1573	1573	0	1	1	0	2	502	0	2	0
1576	1576	2	3	1	0	6	503	0	3	0
1577	1577	1	0	1	0	2	502	0	2	0
1581	1581	0	3	0	0	3	504	0	1	0
1582	1582	0	4	1	0	5	501	0	2	0
1586	1586	0	1	1	0	2	508	0	2	0
1588	1588	0	2	2	0	4	503	0	2	0
1589	1589	0	1	0	0	1	495	0	1	0
1591	1591	0	0	1	1	2	514	0	2	0
1593	1593	0	1	0	0	1	531	0	1	1
1595	1595	0	0	0	14	14	509	0	1	0
1600	1600	0	2	5	0	7	555	12	2	0
1601	1601	0	14	3	0	17	770	4	2	0
1602	1602	0	9	0	2	11	708	0	2	0
1603	1603	0	1	0	1	2	113	3	2	1
1604	1604	0	3	0	0	3	440	0	1	0
1605	1605	0	5	3	6	14	895	5	3	0
1606	1606	1	0	4	6	11	735	0	3	0
1607	1607	0	0	1	0	1	804	0	1	0
1609	1609	0	2	0	0	2	942	0	1	0
1611	1611	0	7	0	1	8	102	0	2	0
1612	1612	0	3	4	0	7	1430	0	2	0
1613	1613	0	6	0	3	9	454	0	2	1
1615	1615	2	5	0	4	11	501	1	3	0
1616	1616	1	26	5	6	38	752	13	4	0
1617	1617	0	0	0	8	8	744	0	1	1
1618	1618	0	0	0	2	2	295	0	1	0
1621	1621	0	3	0	0	3	617	0	1	0
1622	1622	4	1	2	4	11	104	1	4	0
1627	1627	0	18	3	1	22	651	0	3	0
1628	1628	0	1	0	0	1	325	0	1	0
1629	1629	2	4	0	0	6	482	1	2	0
1630	1630	0	3	2	0	5	1447	25	2	0
1632	1632	2	0	0	3	5	302	0	2	1
1633	1633	0	11	0	2	13	260	0	2	0
1634	1634	2	0	0	0	2	359	3	1	0
1635	1635	0	0	2	0	2	189	0	1	0
1636	1636	0	2	0	1	3	1306	0	2	0
1639	1639	1	7	0	5	13	1278	5	3	0
1641	1641	2	25	2	0	29	441	0	3	0
1642	1642	3	5	4	22	34	1140	17	4	0
1643	1643	1	2	0	6	9	427	4	3	0
1645	1645	4	0	6	0	10	323	0	2	1
1646	1646	8	0	5	0	13	323	0	2	0
1647	1647	0	0	0	3	3	165	1	1	0
1649	1649	0	6	0	0	6	169	0	1	0
1650	1650	0	3	0	5	8	456	5	2	1
1652	1652	0	1	0	1	2	118	0	2	0
1653	1653	3	3	1	5	12	740	1	4	0
1654	1654	2	22	10	7	41	662	3	4	0
1655	1655	9	8	6	16	39	614	7	4	1
1656	1656	1	3	3	8	15	483	2	4	1
1657	1657	0	14	2	0	16	3027	0	2	1
1659	1659	0	14	0	0	14	1220	2	1	0
1660	1660	3	8	8	7	26	1270	17	4	0
1662	1662	1	9	0	2	12	875	0	3	1
1663	1663	0	1	0	6	7	970	0	2	0
1665	1665	6	3	1	11	21	795	4	4	0
1666	1666	2	1	0	0	3	335	0	2	0
1668	1668	0	0	2	0	2	94	0	1	0
1674	1674	3	10	0	2	15	470	2	3	0
1675	1675	0	0	0	2	2	253	0	1	0
1676	1676	0	6	1	2	9	331	1	3	0
1677	1677	0	0	0	2	2	338	2	1	0
1678	1678	0	2	0	2	4	97	0	2	0
1687	1687	0	1	1	1	3	496	0	3	0
1716	1716	2	0	0	3	5	277	0	2	1
1717	1717	0	2	1	5	8	475	0	3	0
1718	1718	0	1	2	7	10	516	0	3	0
1719	1719	0	0	0	10	10	187	0	1	0
1723	1723	0	1	0	3	4	395	0	2	0
1725	1725	0	2	0	6	8	369	0	2	0
1727	1727	1	0	4	7	12	301	1	3	0
1728	1728	3	1	1	15	20	274	0	4	0
1729	1729	2	3	4	7	16	1272	0	4	0
1730	1730	3	4	1	0	8	1101	0	3	0
1731	1731	0	5	1	0	6	367	0	2	0
1736	1736	5	11	0	5	21	514	9	3	0
1737	1737	1	2	0	0	3	647	1	2	0
1738	1738	6	1	0	8	15	509	3	3	0
1739	1739	0	19	8	4	31	926	5	3	0
1740	1740	0	6	8	0	14	975	0	2	0
1741	1741	1	4	4	0	9	817	2	3	0
1742	1742	0	4	9	0	13	767	8	2	1
1743	1743	2	0	0	4	6	453	1	2	0
1745	1745	0	0	0	0	0	255	1	0	0
1746	1746	0	3	1	1	5	328	0	3	0
1747	1747	0	4	0	0	4	287	0	1	0
1749	1749	0	2	0	0	2	289	0	1	0
1750	1750	0	1	0	0	1	265	0	1	1
1756	1756	1	24	0	2	27	3685	6	3	0
1757	1757	0	1	2	0	3	918	0	2	0
1759	1759	1	12	5	2	20	864	5	4	0
1760	1760	0	3	0	2	5	639	0	2	0
1762	1762	0	1	0	2	3	674	0	2	0
1763	1763	0	0	0	8	8	1146	2	1	0
1767	1767	2	5	2	0	9	4624	0	3	0
1768	1768	0	5	6	0	11	4158	1	2	0
1769	1769	0	5	4	0	9	4490	0	2	0
1770	1770	0	2	1	0	3	4486	0	2	0
1773	1773	0	3	1	0	4	282	0	2	0
1776	1776	0	2	0	0	2	305	0	1	0
1778	1778	7	19	5	38	69	4646	9	4	0
1780	1780	0	2	0	0	2	645	0	1	0
1781	1781	0	10	0	0	10	638	5	1	0
1783	1783	0	12	1	0	13	492	0	2	0
1785	1785	1	11	4	6	22	870	7	4	0
1786	1786	7	17	3	13	40	1632	10	4	0
1788	1788	0	3	0	2	5	912	2	2	1
1789	1789	0	10	1	3	14	853	2	3	0
1791	1791	0	2	1	1	4	509	3	3	1
1793	1793	3	5	1	0	9	1865	11	3	0
1794	1794	4	13	4	16	37	1830	1	4	0
1795	1795	0	1	2	0	3	2030	0	2	0
1796	1796	0	8	12	0	20	481	7	2	0
1798	1798	0	0	0	1	1	408	0	1	1
1801	1801	0	0	0	5	5	443	0	1	0
1802	1802	0	6	0	1	7	489	0	2	1
1803	1803	0	2	0	0	2	766	0	1	0
1806	1806	1	4	0	0	5	1025	0	2	1
1808	1808	0	15	5	2	22	572	2	3	0
1809	1809	0	10	3	0	13	570	2	2	0
1810	1810	0	7	0	0	7	176	0	1	0
1811	1811	0	2	1	0	3	764	0	2	0
1812	1812	0	1	0	0	1	446	5	1	0
1813	1813	0	8	0	0	8	443	3	1	0
1814	1814	0	7	0	0	7	400	2	1	0
1815	1815	0	2	0	0	2	419	2	1	0
1816	1816	0	0	0	0	0	477	3	0	0
1819	1819	0	2	0	6	8	364	0	2	0
1820	1820	0	7	1	0	8	593	0	2	0
1821	1821	0	1	0	0	1	957	0	1	0
1822	1822	2	20	2	1	25	1190	0	4	0
1823	1823	1	1	0	0	2	894	0	2	0
1824	1824	0	4	6	1	11	901	0	3	0
1825	1825	0	9	4	1	14	896	0	3	0
1826	1826	0	0	0	1	1	2012	1	1	0
1827	1827	0	2	1	0	3	252	1	2	0
1828	1828	1	5	1	0	7	1049	0	3	0
1829	1829	0	7	12	8	27	1118	0	3	0
1830	1830	0	1	0	0	1	999	0	1	0
1831	1831	0	3	0	2	5	200	0	2	0
1832	1832	1	43	14	8	66	2871	0	4	0
1834	1834	0	1	0	0	1	1301	0	1	0
1836	1836	0	5	1	1	7	739	0	3	0
1837	1837	0	5	0	0	5	743	0	1	0
1838	1838	0	3	0	0	3	627	0	1	0
1839	1839	5	1	0	0	6	208	5	2	0
1840	1840	0	0	0	0	0	620	1	0	0
1841	1841	1	0	0	1	2	212	0	2	0
1842	1842	0	1	1	0	2	699	0	2	0
1843	1843	0	4	0	2	6	367	0	2	0
1844	1844	0	0	0	1	1	314	0	1	0
1845	1845	0	1	3	2	6	185	0	3	0
1846	1846	0	1	1	2	4	394	0	3	0
1847	1847	0	3	0	2	5	384	0	2	0
1848	1848	0	7	0	3	10	381	1	2	0
1849	1849	0	2	1	1	4	419	0	3	1
1850	1850	0	1	0	0	1	625	0	1	0
1852	1852	0	6	0	1	7	384	0	2	0
1854	1854	1	6	0	3	10	252	0	3	0
1855	1855	0	3	0	1	4	670	6	2	0
1856	1856	0	9	6	2	17	736	5	3	0
1857	1857	0	8	1	1	10	716	5	3	0
1859	1859	1	6	7	1	15	763	0	4	0
1861	1861	0	0	0	2	2	332	0	1	0
1869	1869	3	7	0	0	10	437	13	2	0
1870	1870	3	2	1	0	6	437	5	3	1
1871	1871	3	2	1	0	6	465	6	3	1
1874	1874	0	3	0	1	4	413	23	2	1
1875	1875	0	0	0	1	1	346	8	1	1
1876	1876	0	1	0	2	3	281	5	2	1
1877	1877	0	3	0	0	3	784	0	1	1
1880	1880	0	5	0	0	5	361	0	1	0
1889	1889	0	4	0	5	9	770	0	2	0
1890	1890	0	1	0	0	1	482	0	1	0
1891	1891	5	4	0	2	11	328	0	3	0
1892	1892	1	0	0	2	3	290	0	2	0
1894	1894	0	19	1	4	24	883	0	3	0
1901	1901	0	2	0	0	2	382	2	1	1
1902	1902	0	1	0	0	1	364	0	1	0
1903	1903	0	1	0	0	1	378	1	1	0
1906	1906	0	0	0	0	0	212	8	0	0
1907	1907	0	0	0	0	0	178	1	0	1
1908	1908	0	0	0	0	0	238	1	0	1
1909	1909	0	13	2	0	15	427	4	2	1
1910	1910	0	10	3	0	13	442	3	2	0
1911	1911	2	8	1	0	11	1004	6	3	0
1912	1912	0	7	0	2	9	858	6	2	0
1915	1915	13	6	6	24	49	462	4	4	0
1917	1917	7	3	3	7	20	463	0	4	1
1933	1933	3	10	2	7	22	225	1	4	1
1936	1936	3	9	2	7	21	647	1	4	0
1937	1937	4	4	0	8	16	437	2	3	0
1938	1938	9	9	5	32	55	858	1	4	0
1939	1939	1	4	0	0	5	584	0	2	0
1942	1942	0	0	0	0	0	205	11	0	0
1946	1946	0	0	0	0	0	228	2	0	1
1947	1947	0	2	7	2	11	346	9	3	1
1948	1948	0	1	5	1	7	333	2	3	0
1949	1949	0	0	1	0	1	340	2	1	0
1950	1950	0	0	1	0	1	1207	45	1	0
1951	1951	0	2	2	0	4	3312	0	2	1
1952	1952	0	5	3	1	9	2923	0	3	0
1953	1953	0	0	2	0	2	1541	0	1	0
1956	1956	3	33	16	17	69	1210	76	4	0
1958	1958	0	7	0	0	7	543	1	1	1
1959	1959	0	1	0	0	1	476	1	1	1
1960	1960	0	0	0	0	0	387	1	0	1
1962	1962	5	1	0	0	6	723	1	2	0
1964	1964	3	0	0	5	8	144	6	2	0
1965	1965	1	5	3	10	19	315	10	4	0
1967	1967	1	0	2	2	5	305	2	3	1
1968	1968	0	2	0	12	14	472	10	2	0
1969	1969	0	26	11	12	49	976	10	3	0
1973	1973	6	1	2	15	24	406	19	4	1
1974	1974	2	1	1	8	12	407	10	4	0
1975	1975	2	41	16	1	60	611	7	4	0
1977	1977	0	4	1	1	6	248	18	3	0
1978	1978	0	22	2	0	24	118	0	2	0
1979	1979	0	9	1	0	10	120	0	2	0
1981	1981	3	30	1	4	38	1599	29	4	0
1982	1982	0	9	2	7	18	907	7	3	0
1983	1983	1	10	3	2	16	431	0	4	0
1984	1984	4	2	1	7	14	184	0	4	0
1992	1992	2	1	1	3	7	379	0	4	0
1993	1993	0	1	0	3	4	359	0	2	0
1994	1994	0	9	3	10	22	326	1	3	0
1996	1996	0	4	0	0	4	383	0	1	0
1997	1997	0	9	1	1	11	619	2	3	0
1998	1998	0	13	0	1	14	581	0	2	0
1999	1999	0	3	0	7	10	371	0	2	0
2000	2000	0	9	0	2	11	663	0	2	0
2002	2002	0	10	0	0	10	428	3	1	0
2004	2004	0	5	0	1	6	407	2	2	1
2005	2005	0	4	0	0	4	431	2	1	0
2006	2006	0	0	0	0	0	724	3	0	1
2009	2009	0	2	0	0	2	834	0	1	0
2010	2010	0	28	17	2	47	254	14	3	0
2011	2011	0	41	2	1	44	788	1	3	0
2017	2017	12	27	20	11	70	550	6	4	0
2020	2020	0	1	0	0	1	333	0	1	1
2021	2021	0	0	0	7	7	297	0	1	0
2022	2022	0	7	0	0	7	658	13	1	0
2023	2023	32	13	6	28	79	434	0	4	0
2026	2026	2	6	2	0	10	434	0	3	1
2027	2027	0	3	2	0	5	434	0	2	0
2028	2028	0	0	2	0	2	957	0	1	0
2029	2029	0	8	1	1	10	137	0	3	0
2030	2030	0	2	0	7	9	456	0	2	0
2033	2033	72	22	8	1	103	2414	48	4	0
2034	2034	3	2	1	5	11	870	4	4	0
2035	2035	2	22	1	1	26	775	1	4	1
2036	2036	0	32	7	0	39	881	0	2	1
2037	2037	4	23	5	25	57	1005	0	4	0
2038	2038	0	1	0	0	1	721	0	1	0
2039	2039	0	21	1	0	22	405	0	2	0
2040	2040	0	4	0	0	4	288	0	1	0
2041	2041	0	7	4	3	14	976	0	3	0
2042	2042	0	2	7	0	9	983	1	2	1
2043	2043	0	1	5	1	7	986	2	3	0
2044	2044	0	3	7	0	10	1037	1	2	0
2045	2045	0	1	5	2	8	998	0	3	0
2046	2046	0	1	3	0	4	1005	0	2	0
2047	2047	0	4	8	0	12	984	4	2	0
2048	2048	0	14	14	0	28	987	8	2	0
2049	2049	0	2	9	0	11	998	0	2	1
2050	2050	0	11	9	1	21	987	0	3	0
2051	2051	0	0	5	0	5	1021	0	1	1
2052	2052	1	0	0	3	4	455	0	2	0
2053	2053	2	0	0	0	2	555	0	1	0
2054	2054	0	0	0	1	1	288	0	1	0
2056	2056	0	0	0	0	0	193	7	0	0
2057	2057	0	0	9	0	9	508	14	1	0
2058	2058	10	17	6	20	53	1512	2	4	0
2059	2059	0	22	9	2	33	822	2	3	0
2060	2060	0	16	2	12	30	896	10	3	0
2063	2063	0	3	0	2	5	404	0	2	0
2064	2064	0	13	12	7	32	1255	42	3	1
2065	2065	0	3	12	0	15	1342	18	2	1
2066	2066	2	2	22	2	28	1308	23	4	1
2067	2067	0	0	0	1	1	297	5	1	1
2068	2068	0	0	0	9	9	760	22	1	0
2069	2069	0	0	0	0	0	169	8	0	0
2070	2070	0	2	0	0	2	639	0	1	1
2071	2071	0	2	1	3	6	782	25	3	0
2072	2072	1	3	0	2	6	916	5	3	0
2073	2073	1	22	1	0	24	1186	3	3	0
2074	2074	0	14	1	1	16	1493	3	3	0
2077	2077	0	25	1	1	27	548	0	3	1
2078	2078	0	1	3	0	4	486	2	2	0
2079	2079	1	4	1	3	9	104	2	4	1
2081	2081	0	6	0	0	6	977	0	1	0
2086	2086	0	1	0	0	1	604	0	1	0
2091	2091	1	3	0	8	12	321	5	3	0
2098	2098	4	0	2	5	11	282	0	3	0
2099	2099	8	20	3	1	32	595	28	4	0
2100	2100	0	2	2	0	4	530	2	2	1
2101	2101	4	5	0	0	9	423	0	2	1
2103	2103	1	1	0	0	2	508	0	2	0
2104	2104	0	1	0	0	1	458	0	1	0
2107	2107	0	2	0	4	6	437	8	2	0
2108	2108	1	4	0	5	10	333	0	3	0
2109	2109	2	3	1	0	6	346	0	3	0
2110	2110	0	1	1	0	2	617	0	2	0
2113	2113	1	7	4	1	13	485	4	4	0
2114	2114	0	5	0	0	5	469	5	1	1
2115	2115	2	7	0	0	9	477	0	2	1
2117	2117	1	4	0	0	5	512	2	2	0
2118	2118	0	2	1	0	3	484	0	2	0
2119	2119	0	1	0	0	1	510	1	1	1
2120	2120	2	10	7	0	19	452	1	3	0
2122	2122	1	4	1	0	6	1239	0	3	1
2123	2123	0	1	0	0	1	259	0	1	1
2124	2124	0	5	0	0	5	448	0	1	0
2125	2125	0	7	4	3	14	2033	0	3	0
2130	2130	0	2	3	2	7	661	2	3	0
2131	2131	0	1	1	0	2	746	0	2	1
2132	2132	0	0	0	9	9	731	0	1	1
2138	2138	0	2	0	0	2	592	0	1	1
2139	2139	0	1	0	0	1	538	0	1	0
2140	2140	0	7	0	0	7	573	0	1	0
2145	2145	0	0	0	1	1	747	0	1	0
2146	2146	0	11	0	2	13	751	5	2	0
2147	2147	0	2	0	0	2	622	1	1	1
2149	2149	0	5	2	0	7	425	3	2	0
2150	2150	0	4	0	4	8	397	0	2	0
2151	2151	0	0	1	0	1	374	9	1	0
2152	2152	0	3	0	2	5	295	1	2	0
2153	2153	0	9	2	0	11	2224	0	2	1
2155	2155	0	0	0	0	0	466	1	0	0
2157	2157	1	0	0	0	1	2351	0	1	0
2158	2158	0	2	0	0	2	461	0	1	0
2159	2159	0	0	0	0	0	488	2	0	0
2160	2160	0	3	2	0	5	625	1	2	0
2162	2162	4	0	1	0	5	732	2	2	0
2166	2166	0	1	2	0	3	579	0	2	0
2167	2167	0	0	1	0	1	132	0	1	0
2168	2168	2	3	0	0	5	127	0	2	0
2170	2170	0	0	1	0	1	133	0	1	0
2171	2171	2	0	1	4	7	135	0	3	1
2175	2175	0	5	0	11	16	1455	20	2	0
2176	2176	0	0	0	0	0	558	19	0	0
2177	2177	0	21	2	13	36	1471	9	3	0
2178	2178	0	5	0	4	9	536	17	2	0
2180	2180	0	2	1	5	8	698	0	3	0
2181	2181	0	4	1	10	15	720	0	3	0
2182	2182	3	5	3	14	25	711	0	4	0
2184	2184	1	0	0	1	2	419	0	2	0
2185	2185	0	27	13	2	42	1009	14	3	0
2186	2186	2	24	3	3	32	2920	2	4	0
2187	2187	0	1	1	0	2	859	12	2	0
2188	2188	0	2	0	1	3	374	20	2	0
2189	2189	0	3	0	1	4	622	20	2	0
2193	2193	2	2	1	15	20	508	0	4	0
2194	2194	15	9	2	39	65	2511	0	4	0
2195	2195	1	13	10	56	80	4588	0	4	1
2196	2196	0	3	4	0	7	4349	0	2	1
2197	2197	1	0	0	0	1	133	22	1	1
2199	2199	0	1	0	0	1	1231	0	1	1
2200	2200	0	5	1	0	6	2871	3	2	0
2203	2203	1	0	1	0	2	338	0	2	0
2204	2204	0	0	1	0	1	287	0	1	0
2205	2205	0	0	0	0	0	257	9	0	0
2206	2206	0	1	3	0	4	244	9	2	0
2207	2207	0	3	2	1	6	86	13	3	0
2208	2208	0	0	0	0	0	321	1	0	0
2209	2209	0	0	2	0	2	374	2	1	0
2210	2210	2	0	0	0	2	280	0	1	0
2212	2212	0	0	4	0	4	317	1	1	0
2213	2213	0	1	1	0	2	310	4	2	0
2222	2222	0	0	1	5	6	417	0	2	0
2224	2224	2	0	0	7	9	419	0	2	0
2230	2230	0	1	0	0	1	184	0	1	0
2232	2232	0	2	0	0	2	497	0	1	0
2235	2235	2	0	0	3	5	429	0	2	0
2237	2237	8	3	1	5	17	380	1	4	0
2239	2239	0	0	0	0	0	556	4	0	0
2241	2241	0	4	5	2	11	822	1	3	0
2242	2242	0	10	5	1	16	822	7	3	1
2243	2243	2	10	1	0	13	866	9	3	1
2244	2244	0	0	1	0	1	491	9	1	0
2245	2245	0	10	0	0	10	961	0	1	0
2246	2246	0	0	0	0	0	155	8	0	0
2247	2247	5	3	0	0	8	288	7	2	1
2248	2248	0	0	0	0	0	239	3	0	0
2249	2249	0	1	0	0	1	206	6	1	1
2250	2250	0	0	0	0	0	268	3	0	1
2251	2251	0	0	0	0	0	208	4	0	1
2252	2252	0	0	0	0	0	194	3	0	0
2253	2253	0	0	0	0	0	244	4	0	0
2254	2254	0	0	0	0	0	208	5	0	0
2255	2255	0	1	2	0	3	208	3	2	0
2256	2256	0	0	0	0	0	225	3	0	0
2258	2258	0	3	0	0	3	255	3	1	0
2259	2259	0	0	0	0	0	252	3	0	0
2260	2260	2	6	13	0	21	822	9	3	0
2261	2261	0	4	7	0	11	806	17	2	1
2263	2263	0	6	8	0	14	822	5	2	0
2264	2264	0	4	3	0	7	802	5	2	1
2266	2266	0	0	0	0	0	453	9	0	0
2268	2268	0	3	7	0	10	529	2	2	0
2271	2271	6	0	1	1	8	510	0	3	1
2272	2272	0	0	2	0	2	147	0	1	1
2273	2273	1	0	3	2	6	280	1	3	1
2274	2274	0	1	1	1	3	279	3	3	0
2275	2275	0	0	0	2	2	280	0	1	0
2277	2277	0	0	0	0	0	354	12	0	0
2280	2280	1	1	0	2	4	108	2	3	0
2287	2287	3	5	1	2	11	224	1	4	0
2288	2288	2	4	6	14	26	459	1	4	0
2289	2289	0	2	2	4	8	457	6	3	0
2290	2290	0	2	1	0	3	489	2	2	0
2296	2296	0	11	0	0	11	553	0	1	1
2299	2299	0	1	1	0	2	378	0	2	1
2303	2303	0	13	0	0	13	501	0	1	0
2305	2305	0	21	0	0	21	801	0	1	0
2308	2308	7	26	0	0	33	655	3	2	0
2309	2309	0	30	0	0	30	673	5	1	1
2312	2312	0	12	2	0	14	4061	0	2	1
2313	2313	1	5	5	1	12	452	1	4	0
2314	2314	1	6	1	14	22	1269	0	4	1
2315	2315	0	1	0	0	1	118	0	1	0
2316	2316	15	39	16	18	88	2647	2	4	0
2317	2317	5	59	13	5	82	2602	0	4	1
2318	2318	0	5	4	1	10	2725	0	3	0
2319	2319	0	0	4	5	9	428	1	2	0
2321	2321	0	2	11	0	13	1338	9	2	0
2322	2322	0	3	14	2	19	993	0	3	1
2324	2324	0	1	11	0	12	1363	16	2	1
2326	2326	0	0	1	0	1	532	0	1	0
2328	2328	1	2	1	0	4	532	0	3	0
2329	2329	0	0	1	0	1	558	0	1	0
2330	2330	0	3	0	0	3	533	0	1	0
2332	2332	0	8	2	0	10	632	0	2	0
2334	2334	0	3	3	0	6	1311	0	2	0
2335	2335	0	5	2	1	8	2477	31	3	0
2339	2339	0	1	0	1	2	379	0	2	0
2342	2342	0	1	2	3	6	437	0	3	0
2353	2353	0	8	2	1	11	380	17	3	0
2354	2354	0	1	0	0	1	338	2	1	1
2355	2355	0	16	0	0	16	326	1	1	1
2356	2356	0	1	0	4	5	587	0	2	0
2357	2357	0	11	1	0	12	350	1	2	0
2358	2358	0	5	1	0	6	351	1	2	0
2395	2395	0	0	0	1	1	210	0	1	0
2444	2444	0	2	9	0	11	505	0	2	0
2475	2475	1	31	2	10	44	2549	20	4	1
2483	2483	1	0	2	0	3	258	1	2	1
2487	2487	0	0	0	0	0	325	1	0	0
2488	2488	0	0	0	0	0	129	3	0	0
2491	2491	0	6	0	1	7	756	10	2	0
2492	2492	0	0	1	0	1	695	3	1	0
2494	2494	0	3	0	0	3	541	0	1	0
2495	2495	0	4	1	1	6	183	0	3	0
2512	2512	1	1	1	7	10	175	0	4	0
2515	2515	0	0	0	0	0	735	1	0	0
2516	2516	3	2	0	1	6	461	0	3	0
2517	2517	0	0	1	0	1	466	0	1	0
2519	2519	0	1	0	1	2	467	0	2	0
2520	2520	0	1	0	0	1	101	1	1	0
2521	2521	0	10	1	3	14	526	9	3	0
2523	2523	0	0	1	0	1	365	0	1	1
2529	2529	0	0	0	1	1	342	0	1	0
2533	2533	4	7	10	0	21	829	4	3	0
2534	2534	0	10	10	0	20	537	72	2	0
2535	2535	0	0	0	1	1	565	8	1	1
2539	2539	7	3	8	6	24	545	0	4	0
2542	2542	0	0	0	2	2	429	0	1	0
2543	2543	0	2	2	0	4	139	0	2	0
2547	2547	12	14	4	31	61	609	40	4	0
2549	2549	0	15	14	0	29	724	43	2	0
2550	2550	0	3	0	0	3	961	2	1	0
2551	2551	2	1	0	1	4	454	0	3	0
2554	2554	0	0	2	0	2	456	6	1	0
2555	2555	0	0	0	0	0	451	6	0	0
2556	2556	0	1	1	0	2	492	5	2	0
2557	2557	0	3	0	0	3	554	5	1	0
2558	2558	0	0	0	1	1	462	5	1	0
2559	2559	1	1	1	0	3	453	5	3	0
2560	2560	0	1	0	1	2	474	0	2	0
2561	2561	0	2	3	0	5	512	1	2	0
2562	2562	0	2	0	0	2	473	1	1	0
2563	2563	0	0	0	3	3	452	0	1	0
2566	2566	0	1	0	0	1	515	1	1	0
2567	2567	0	0	1	0	1	467	1	1	0
2569	2569	0	0	3	0	3	479	0	1	0
2570	2570	0	0	1	0	1	490	0	1	0
2571	2571	0	1	0	0	1	594	2	1	0
2572	2572	0	4	0	0	4	585	2	1	0
2576	2576	0	1	2	0	3	117	0	2	0
2577	2577	0	1	2	0	3	117	0	2	0
2578	2578	0	1	2	0	3	117	0	2	0
2580	2580	0	28	4	3	35	1311	0	3	0
2582	2582	0	0	0	6	6	348	0	1	1
2583	2583	0	0	0	1	1	533	0	1	0
2584	2584	0	0	1	3	4	392	0	2	0
2585	2585	0	0	0	2	2	458	0	1	0
2587	2587	0	0	2	0	2	349	0	1	0
2588	2588	0	0	0	0	0	522	1	0	1
2589	2589	0	0	0	1	1	559	0	1	0
2590	2590	0	0	0	1	1	571	0	1	0
2592	2592	0	0	0	1	1	379	0	1	0
2593	2593	0	0	2	1	3	236	0	2	0
2595	2595	1	0	0	1	2	914	0	2	0
2596	2596	0	15	0	0	15	274	0	1	0
2597	2597	10	16	4	18	48	335	4	4	0
2617	2617	4	4	2	15	25	739	0	4	0
2618	2618	1	1	1	20	23	1010	0	4	0
2619	2619	0	0	0	1	1	345	0	1	0
2620	2620	0	5	0	0	5	313	0	1	1
2621	2621	0	3	0	0	3	678	0	1	0
2623	2623	6	7	4	0	17	413	1	3	1
2624	2624	0	2	2	0	4	480	1	2	0
2625	2625	4	3	2	0	9	444	1	3	0
2626	2626	0	3	2	0	5	442	4	2	0
2627	2627	0	5	1	0	6	595	0	2	0
2628	2628	1	8	0	0	9	423	0	2	0
2629	2629	0	0	1	0	1	536	0	1	0
2631	2631	1	1	1	2	5	286	0	4	0
2632	2632	1	0	3	8	12	702	0	3	0
2639	2639	0	1	0	0	1	438	0	1	0
2641	2641	0	0	0	0	0	180	2	0	0
2642	2642	0	1	0	0	1	477	0	1	0
2643	2643	0	2	0	0	2	250	0	1	0
2644	2644	0	0	1	0	1	84	0	1	0
2645	2645	0	1	0	0	1	466	0	1	0
2647	2647	0	1	0	1	2	125	7	2	0
2648	2648	0	0	1	1	2	837	15	2	0
2649	2649	0	1	0	0	1	480	0	1	0
2650	2650	1	1	0	0	2	428	0	2	0
2653	2653	1	0	0	0	1	173	0	1	0
2657	2657	0	0	0	0	0	372	1	0	0
2658	2658	0	2	0	0	2	429	10	1	0
2660	2660	0	0	0	0	0	375	7	0	0
2661	2661	0	1	0	0	1	454	7	1	0
2662	2662	0	1	0	0	1	478	7	1	0
2664	2664	0	0	3	7	10	447	0	2	0
2665	2665	3	1	7	12	23	445	0	4	0
2668	2668	0	0	0	0	0	228	19	0	0
2669	2669	2	4	0	0	6	296	0	2	1
2670	2670	0	8	3	0	11	432	0	2	0
2671	2671	0	1	0	1	2	205	0	2	0
2672	2672	0	1	0	0	1	422	1	1	0
2673	2673	0	7	0	6	13	681	0	2	1
2674	2674	0	0	0	0	0	465	18	0	0
2675	2675	0	0	0	0	0	464	1	0	0
2677	2677	0	2	1	2	5	758	0	3	0
2686	2686	0	4	0	0	4	662	0	1	0
2688	2688	0	3	1	0	4	217	14	2	0
2689	2689	0	0	0	0	0	256	1	0	0
2690	2690	0	2	5	0	7	638	19	2	0
2691	2691	0	0	1	0	1	108	1	1	0
2695	2695	0	0	0	0	0	153	1	0	0
2697	2697	0	15	3	2	20	382	5	3	0
2700	2700	0	0	0	1	1	435	0	1	1
2702	2702	0	2	0	0	2	358	0	1	0
2705	2705	0	4	0	0	4	283	0	1	0
2706	2706	7	4	0	4	15	226	0	3	0
2707	2707	0	0	0	1	1	270	1	1	1
2710	2710	0	0	0	6	6	553	0	1	0
2712	2712	0	0	3	0	3	553	0	1	0
2717	2717	0	0	0	5	5	429	0	1	0
2719	2719	0	0	0	2	2	580	0	1	0
2720	2720	1	0	1	2	4	677	2	3	1
2729	2729	0	3	0	5	8	637	0	2	0
2730	2730	1	0	0	0	1	274	0	1	0
2731	2731	0	2	0	0	2	1020	0	1	0
2733	2733	0	3	2	13	18	698	1	3	0
2734	2734	1	1	0	5	7	1203	1	3	0
2735	2735	2	5	0	0	7	1106	2	2	0
2736	2736	0	7	0	0	7	1586	2	1	1
2737	2737	0	2	0	4	6	1580	3	2	1
2738	2738	0	1	0	0	1	376	0	1	1
2739	2739	1	1	0	3	5	184	0	3	1
2740	2740	0	0	0	0	0	463	2	0	0
2741	2741	0	1	0	0	1	449	0	1	0
2743	2743	0	0	1	0	1	497	0	1	0
2744	2744	1	0	0	2	3	669	0	2	0
2745	2745	0	0	0	1	1	106	0	1	0
2746	2746	9	6	3	13	31	558	0	4	0
2747	2747	5	2	0	6	13	558	0	3	0
2752	2752	0	2	3	11	16	373	0	3	0
2762	2762	0	0	4	3	7	372	0	2	0
2764	2764	1	4	1	4	10	142	0	4	0
2766	2766	1	0	1	0	2	345	0	2	0
2767	2767	0	1	1	6	8	359	8	3	0
2768	2768	0	2	0	2	4	381	11	2	0
2769	2769	0	1	0	0	1	374	3	1	0
2770	2770	0	0	0	8	8	354	14	1	0
2771	2771	0	3	3	8	14	355	8	3	0
2773	2773	0	0	3	8	11	354	4	2	0
2774	2774	0	0	0	4	4	458	5	1	0
2775	2775	0	0	1	2	3	354	4	2	0
2776	2776	1	2	0	2	5	359	20	3	0
2778	2778	0	2	2	15	19	1037	20	3	0
2779	2779	1	0	1	2	4	350	3	3	0
2780	2780	0	0	0	2	2	354	1	1	0
2781	2781	0	2	0	2	4	355	1	2	0
2782	2782	0	0	0	4	4	340	63	1	0
2783	2783	0	1	1	4	6	340	7	3	0
2784	2784	1	1	0	0	2	340	17	2	0
2785	2785	0	2	0	0	2	75	0	1	0
2787	2787	0	0	0	2	2	68	0	1	0
2788	2788	0	0	0	1	1	68	0	1	0
2790	2790	0	0	0	0	0	68	28	0	0
2792	2792	0	1	1	0	2	74	31	2	0
2793	2793	0	0	0	0	0	69	10	0	0
2794	2794	0	13	0	1	14	607	0	2	0
2796	2796	0	0	0	0	0	92	1	0	0
2799	2799	0	0	0	2	2	552	0	1	0
2800	2800	0	8	0	0	8	767	0	1	0
2801	2801	0	8	0	2	10	1002	2	2	0
2802	2802	0	14	2	0	16	1498	0	2	0
2803	2803	0	23	2	1	26	2230	0	3	0
2804	2804	0	14	4	0	18	3259	0	2	0
2805	2805	1	2	1	9	13	413	0	4	0
2806	2806	10	2	2	3	17	430	0	4	0
2810	2810	1	6	2	5	14	248	8	4	0
2811	2811	1	5	3	0	9	639	10	3	1
2812	2812	0	2	0	0	2	206	9	1	0
2814	2814	0	0	0	0	0	560	8	0	0
2815	2815	0	0	0	0	0	177	8	0	0
2817	2817	0	0	0	0	0	558	18	0	0
2820	2820	1	2	3	1	7	727	0	4	0
2821	2821	5	3	0	13	21	558	0	3	0
2822	2822	1	0	0	0	1	840	0	1	0
2823	2823	0	3	0	0	3	278	0	1	0
2826	2826	0	2	0	0	2	362	1	1	0
2827	2827	0	3	0	0	3	330	0	1	0
2830	2830	0	3	0	0	3	362	0	1	0
2832	2832	0	0	3	0	3	333	0	1	0
2833	2833	0	0	0	0	0	415	1	0	0
2834	2834	0	0	1	0	1	370	0	1	0
2835	2835	0	2	0	0	2	334	0	1	0
2838	2838	0	1	0	0	1	360	0	1	0
2844	2844	0	0	1	0	1	349	0	1	0
2857	2857	0	2	1	0	3	381	0	2	0
2861	2861	0	0	0	0	0	613	1	0	0
2863	2863	0	1	0	0	1	453	0	1	0
2864	2864	0	0	1	0	1	300	0	1	0
2868	2868	1	0	0	2	3	578	0	2	0
2869	2869	0	3	1	0	4	590	0	2	0
2870	2870	0	2	3	4	9	589	0	3	0
2872	2872	0	10	0	1	11	465	0	2	0
2873	2873	1	6	1	10	18	527	9	4	0
2874	2874	0	0	0	1	1	327	8	1	0
2875	2875	0	1	0	0	1	496	0	1	0
2876	2876	0	0	1	0	1	203	0	1	0
2879	2879	1	0	0	0	1	234	0	1	0
2885	2885	4	1	5	6	16	217	160	4	0
2886	2886	0	3	3	0	6	532	7	2	0
2887	2887	0	9	2	0	11	594	5	2	0
2888	2888	0	2	1	0	3	540	2	2	0
2889	2889	0	9	4	0	13	1095	15	2	0
2890	2890	0	7	0	0	7	906	0	1	1
2891	2891	0	3	2	0	5	883	1	2	0
2892	2892	0	0	5	0	5	894	0	1	0
2893	2893	0	2	0	0	2	902	0	1	0
2894	2894	0	2	0	0	2	1009	0	1	0
2896	2896	0	0	0	0	0	593	1	0	0
2897	2897	0	3	1	0	4	918	0	2	0
2898	2898	0	1	0	0	1	908	1	1	0
2899	2899	0	1	1	0	2	919	1	2	0
2900	2900	0	4	0	0	4	956	0	1	0
2902	2902	0	5	1	0	6	938	2	2	0
2903	2903	0	14	12	1	27	1464	2	3	0
2904	2904	2	12	13	0	27	1484	1	3	0
2905	2905	0	0	1	0	1	1233	0	1	0
2906	2906	0	1	0	7	8	1336	2	2	0
2908	2908	4	15	0	0	19	778	15	2	0
2909	2909	1	24	5	2	32	1499	2	4	0
2911	2911	0	2	3	0	5	1194	3	2	0
2912	2912	0	0	0	0	0	872	2	0	0
2913	2913	0	0	5	0	5	879	2	1	0
2914	2914	0	0	0	0	0	912	2	0	0
2915	2915	0	2	0	0	2	1212	3	1	0
2916	2916	0	0	0	0	0	877	2	0	0
2917	2917	0	3	0	0	3	922	2	1	0
2918	2918	1	0	0	0	1	908	2	1	0
2922	2922	0	0	0	0	0	148	1	0	0
2923	2923	4	3	0	7	14	505	6	3	1
2926	2926	0	2	1	1	4	480	0	3	0
2931	2931	0	21	4	2	27	483	4	3	0
2932	2932	0	19	3	0	22	433	14	2	0
2934	2934	2	1	5	4	12	782	1	4	1
2935	2935	5	1	0	4	10	637	2	3	0
2936	2936	2	1	3	9	15	522	0	4	0
2937	2937	1	3	1	7	12	474	0	4	0
2938	2938	2	3	1	0	6	222	1	3	0
2939	2939	1	3	1	0	5	222	0	3	0
2940	2940	1	3	0	0	4	222	1	2	0
2941	2941	0	2	0	2	4	222	0	2	0
2944	2944	2	1	2	5	10	218	0	4	0
2946	2946	2	3	0	4	9	218	0	3	0
2947	2947	0	1	0	2	3	225	0	2	0
2948	2948	1	0	1	6	8	218	0	3	0
2949	2949	1	1	0	2	4	218	0	3	0
2950	2950	5	2	5	4	16	210	0	4	0
2954	2954	0	0	0	0	0	216	0	0	1
2956	2956	2	25	1	19	47	1360	12	4	0
2957	2957	1	4	0	0	5	376	12	2	0
2958	2958	0	0	0	1	1	109	9	1	0
2959	2959	1	2	1	6	10	316	14	4	0
2960	2960	1	9	5	0	15	439	10	3	0
2961	2961	1	0	1	0	2	291	6	2	1
2962	2962	1	32	0	3	36	517	41	3	0
2963	2963	3	2	2	6	13	249	32	4	0
2965	2965	0	2	2	2	6	548	23	3	0
2966	2966	0	0	0	4	4	395	22	1	0
2967	2967	0	0	0	5	5	308	22	1	0
2968	2968	0	1	0	4	5	462	22	2	0
2969	2969	0	32	8	11	51	998	4	3	0
2971	2971	2	1	0	0	3	365	6	2	0
2972	2972	0	5	1	1	7	677	6	3	0
2975	2975	0	20	1	15	36	2109	9	3	1
2976	2976	0	13	0	0	13	911	7	1	0
2982	2982	1	0	0	0	1	690	0	1	0
2983	2983	0	0	1	0	1	619	0	1	0
2984	2984	1	0	1	0	2	1073	0	2	0
2987	2987	0	0	2	1	3	197	0	2	0
2990	2990	0	0	0	4	4	651	0	1	0
2992	2992	0	0	1	1	2	350	0	2	0
2995	2995	0	1	0	0	1	128	0	1	0
2997	2997	0	25	1	6	32	737	0	3	0
2998	2998	5	9	0	1	15	703	0	3	0
3001	3001	0	0	0	0	0	262	1	0	0
3026	3026	0	3	3	0	6	560	0	2	0
3028	3028	0	0	0	3	3	261	0	1	0
3029	3029	1	0	1	0	2	308	0	2	0
3030	3030	13	2	0	3	18	763	0	3	0
3032	3032	4	0	0	2	6	474	0	2	0
3033	3033	5	1	1	1	8	314	0	4	0
3034	3034	1	3	0	0	4	657	0	2	0
3035	3035	1	0	2	14	17	509	0	3	0
3036	3036	0	1	2	0	3	578	0	2	0
3037	3037	0	1	0	1	2	552	0	2	0
3038	3038	0	0	0	2	2	553	0	1	0
3043	3043	2	5	3	0	10	147	0	3	0
3045	3045	1	2	2	0	5	147	0	3	0
3046	3046	1	2	1	0	4	147	0	3	0
3047	3047	0	0	1	0	1	147	0	1	0
3048	3048	0	0	1	0	1	147	0	1	0
3049	3049	0	2	1	0	3	142	0	2	0
3050	3050	0	1	0	0	1	142	0	1	0
3052	3052	0	0	0	1	1	268	0	1	0
3053	3053	0	1	0	0	1	499	1	1	0
3054	3054	5	24	2	9	40	2035	10	4	0
3055	3055	0	4	7	2	13	526	5	3	0
3059	3059	4	4	11	0	19	486	0	3	0
3061	3061	0	0	3	0	3	425	0	1	0
3064	3064	6	23	0	4	33	3144	2	3	0
3065	3065	9	6	1	8	24	482	126	4	0
3066	3066	2	5	1	7	15	582	88	4	1
3068	3068	1	9	0	4	14	256	2	3	1
3069	3069	0	15	4	2	21	1268	2	3	0
3070	3070	0	4	0	5	9	838	0	2	0
3071	3071	1	1	0	3	5	1127	0	3	0
3074	3074	0	0	0	3	3	556	0	1	0
3077	3077	0	0	0	0	0	348	0	0	1
3081	3081	1	2	0	0	3	445	0	2	0
3082	3082	0	0	0	0	0	728	23	0	0
3083	3083	0	0	2	0	2	655	0	1	1
3084	3084	1	1	1	0	3	645	12	3	0
3087	3087	0	2	0	1	3	270	0	2	0
3090	3090	1	1	0	0	2	733	0	2	1
3091	3091	3	7	0	14	24	826	13	3	1
3092	3092	0	2	1	4	7	1037	0	3	1
3093	3093	1	0	0	7	8	200	0	2	0
3094	3094	2	0	0	3	5	126	0	2	0
3096	3096	1	28	0	7	36	2718	0	3	0
3097	3097	0	9	4	11	24	2446	0	3	0
3098	3098	0	1	0	5	6	921	0	2	0
3099	3099	0	0	2	12	14	917	0	2	0
3105	3105	0	7	1	8	16	365	8	3	0
3106	3106	0	2	1	8	11	362	13	3	1
3107	3107	0	0	4	3	7	366	11	2	0
3110	3110	0	2	0	0	2	401	0	1	0
3113	3113	0	0	0	0	0	260	2	0	0
3115	3115	0	1	0	0	1	258	2	1	0
3117	3117	0	0	0	0	0	255	2	0	0
3118	3118	0	0	0	0	0	255	2	0	0
3119	3119	0	0	0	0	0	261	2	0	0
3122	3122	0	0	0	4	4	254	14	1	0
3123	3123	0	0	1	1	2	266	14	2	0
3125	3125	0	0	0	0	0	266	2	0	0
3126	3126	0	0	0	0	0	266	3	0	0
3133	3133	0	0	0	6	6	358	3	1	0
3134	3134	0	0	0	4	4	442	0	1	0
3135	3135	0	0	0	1	1	338	1	1	0
3141	3141	0	2	0	0	2	726	0	1	0
3142	3142	0	4	0	1	5	488	0	2	0
3145	3145	2	1	0	0	3	361	0	2	0
3146	3146	10	5	3	13	31	215	17	4	0
3148	3148	11	5	2	7	25	209	4	4	0
3149	3149	3	0	0	4	7	200	0	2	0
3150	3150	14	10	0	5	29	100	0	3	0
3151	3151	15	2	0	3	20	90	0	3	0
3155	3155	2	0	1	0	3	325	0	2	0
3156	3156	0	1	0	19	20	888	0	2	0
3157	3157	5	6	1	13	25	520	0	4	0
3158	3158	1	1	0	1	3	508	0	3	0
3159	3159	14	16	0	3	33	107	1	3	0
3161	3161	0	4	2	0	6	725	0	2	1
3162	3162	2	3	1	10	16	288	0	4	0
3163	3163	0	1	0	1	2	316	0	2	0
3164	3164	0	6	0	1	7	598	1	2	0
3169	3169	5	4	1	0	10	472	0	3	1
3170	3170	0	9	0	0	9	463	0	1	1
3171	3171	0	0	1	0	1	350	0	1	1
3172	3172	4	17	0	0	21	474	1	2	0
3174	3174	1	2	0	0	3	445	0	2	1
3176	3176	0	3	0	0	3	292	0	1	0
3177	3177	0	1	0	2	3	456	0	2	0
3178	3178	6	21	7	5	39	372	10	4	0
3181	3181	5	12	9	9	35	353	10	4	0
3182	3182	2	6	3	10	21	332	0	4	0
3183	3183	4	22	5	17	48	306	13	4	0
3184	3184	5	9	0	8	22	355	11	3	0
3185	3185	2	6	9	8	25	415	12	4	0
3187	3187	1	10	9	7	27	449	13	4	0
3188	3188	1	6	9	4	20	449	8	4	0
3189	3189	0	4	11	4	19	346	0	3	0
3190	3190	0	15	12	12	39	464	15	3	0
3191	3191	4	8	7	11	30	589	10	4	0
3192	3192	14	15	8	19	56	825	21	4	0
3195	3195	1	1	0	0	2	330	0	2	0
3198	3198	0	1	0	0	1	335	0	1	1
3202	3202	0	2	0	0	2	270	0	1	1
3204	3204	0	0	0	1	1	230	0	1	1
3205	3205	0	1	0	0	1	272	0	1	0
3206	3206	0	0	2	0	2	410	0	1	0
3207	3207	0	0	0	1	1	313	0	1	0
3208	3208	0	1	1	1	3	193	0	3	0
3209	3209	0	0	0	2	2	388	0	1	0
3212	3212	0	4	0	0	4	356	0	1	0
3214	3214	0	1	0	0	1	251	0	1	0
3216	3216	0	2	0	0	2	224	0	1	0
3217	3217	0	4	0	2	6	217	0	2	0
3223	3223	2	0	0	1	3	235	0	2	0
3226	3226	0	3	0	0	3	342	0	1	0
3234	3234	0	1	2	0	3	290	0	2	0
3235	3235	0	1	0	0	1	352	0	1	0
3237	3237	0	1	0	0	1	338	0	1	0
3238	3238	0	0	1	0	1	270	0	1	0
3239	3239	0	0	0	1	1	343	0	1	0
3241	3241	0	0	1	3	4	193	0	2	0
3242	3242	0	3	0	1	4	393	0	2	0
3251	3251	0	1	0	2	3	218	0	2	0
3257	3257	0	1	0	1	2	700	0	2	0
3265	3265	0	2	1	0	3	189	16	2	0
3267	3267	0	10	2	1	13	584	0	3	1
3268	3268	2	4	0	0	6	481	0	2	0
3269	3269	0	9	2	0	11	487	0	2	0
3270	3270	0	2	1	0	3	699	0	2	0
3272	3272	0	0	0	0	0	223	0	0	0
3275	3275	0	0	2	0	2	433	0	1	0
3276	3276	0	0	1	8	9	371	2	2	0
3280	3280	0	4	0	2	6	280	8	2	0
3281	3281	0	1	0	3	4	76	0	2	0
3291	3291	0	0	1	0	1	405	0	1	0
3294	3294	1	1	0	0	2	387	0	2	0
3295	3295	5	10	2	0	17	736	0	3	0
3297	3297	1	21	0	0	22	529	0	2	0
3298	3298	0	0	0	5	5	536	1	1	0
3299	3299	0	1	0	0	1	492	0	1	1
3300	3300	0	4	1	5	10	324	1	3	0
3301	3301	3	4	3	15	25	397	0	4	0
3305	3305	1	7	2	7	17	641	0	4	0
3306	3306	3	4	2	7	16	639	1	4	0
3308	3308	4	11	6	30	51	840	14	4	0
3309	3309	17	7	2	21	47	654	12	4	0
3310	3310	2	1	1	5	9	643	0	4	0
3312	3312	13	22	7	39	81	646	20	4	0
3313	3313	13	15	2	5	35	679	0	4	0
3315	3315	1	12	1	4	18	205	1	4	0
3320	3320	24	16	10	30	80	854	56	4	1
3321	3321	0	5	0	0	5	1214	0	1	1
3326	3326	13	14	9	39	75	724	17	4	0
3329	3329	23	5	3	19	50	573	4	4	0
3336	3336	5	3	2	5	15	102	0	4	0
3337	3337	1	1	1	3	6	340	0	4	0
3339	3339	0	1	0	0	1	4391	4	1	0
3340	3340	0	0	2	0	2	882	0	1	0
3344	3344	0	0	1	0	1	431	0	1	0
3346	3346	0	1	0	0	1	57	0	1	0
3350	3350	0	0	0	1	1	422	0	1	0
3358	3358	0	2	0	0	2	458	1	1	0
3362	3362	0	0	1	0	1	440	0	1	0
3364	3364	0	0	0	2	2	280	19	1	0
3371	3371	0	7	0	0	7	2201	10	1	0
3375	3375	0	0	0	0	0	89	1	0	1
3376	3376	1	5	1	16	23	1262	1	4	0
3381	3381	0	8	1	0	9	317	2	2	0
3382	3382	1	1	0	0	2	483	0	2	0
3383	3383	0	3	2	2	7	532	4	3	0
3384	3384	0	0	1	0	1	275	2	1	0
3385	3385	0	3	0	0	3	547	1	1	0
3386	3386	0	0	0	0	0	272	5	0	0
3394	3394	0	0	3	1	4	426	0	2	0
3396	3396	0	1	0	0	1	206	0	1	1
3397	3397	0	1	0	4	5	155	0	2	0
3398	3398	0	1	0	1	2	134	0	2	1
3399	3399	0	1	0	0	1	119	0	1	0
3416	3416	2	2	0	10	14	1019	0	3	0
3417	3417	4	2	3	6	15	414	0	4	0
3418	3418	14	2	1	3	20	452	0	4	1
3419	3419	1	0	0	3	4	366	1	2	0
3420	3420	4	0	1	2	7	385	1	3	0
3421	3421	0	1	0	0	1	393	1	1	0
3422	3422	1	0	0	6	7	284	0	2	0
3428	3428	3	9	1	7	20	729	0	4	0
3429	3429	0	1	0	0	1	119	0	1	1
3430	3430	0	1	0	3	4	288	0	2	0
3431	3431	0	7	0	0	7	713	0	1	0
3433	3433	0	1	0	0	1	472	0	1	0
3437	3437	0	6	3	0	9	490	0	2	0
3439	3439	0	1	0	0	1	189	9	1	0
3440	3440	0	0	0	0	0	188	3	0	0
3441	3441	0	0	0	0	0	189	3	0	0
3442	3442	0	3	0	0	3	189	3	1	0
3443	3443	0	0	0	0	0	189	3	0	0
3444	3444	0	0	0	0	0	189	3	0	0
3445	3445	0	0	0	0	0	189	3	0	0
3446	3446	0	0	0	0	0	189	3	0	0
3447	3447	1	2	0	0	3	190	9	2	0
3448	3448	0	0	0	0	0	189	3	0	0
3449	3449	0	0	0	0	0	189	3	0	0
3451	3451	0	0	0	0	0	189	3	0	0
3452	3452	0	0	0	0	0	189	3	0	0
3454	3454	0	5	3	0	8	557	22	2	0
3455	3455	1	3	3	0	7	515	22	3	0
3456	3456	0	1	0	0	1	187	7	1	0
3458	3458	0	0	2	0	2	166	11	1	1
3459	3459	0	4	4	3	11	489	20	3	1
3460	3460	0	1	0	0	1	337	11	1	0
3467	3467	0	0	0	0	0	195	2	0	0
3475	3475	0	3	1	2	6	451	0	3	0
3476	3476	1	0	1	6	8	339	0	3	0
3479	3479	0	0	1	0	1	153	12	1	0
3480	3480	1	19	10	1	31	1367	14	4	1
3481	3481	0	0	1	0	1	236	3	1	1
3482	3482	1	10	4	0	15	2491	5	3	0
3483	3483	0	0	0	0	0	643	3	0	1
3484	3484	0	6	0	0	6	259	1	1	0
3485	3485	0	1	0	0	1	328	1	1	1
3486	3486	0	7	0	0	7	297	3	1	0
3487	3487	0	0	0	0	0	258	2	0	1
3488	3488	0	2	0	0	2	272	2	1	1
3489	3489	0	0	0	0	0	240	1	0	1
3491	3491	0	0	0	0	0	381	4	0	1
3508	3508	0	2	0	0	2	993	0	1	1
3512	3512	0	0	0	5	5	159	0	1	0
3516	3516	1	1	0	0	2	500	17	2	0
3547	3547	0	0	1	0	1	1336	0	1	0
3549	3549	0	0	0	0	0	411	6	0	0
3550	3550	4	8	2	2	16	557	1	4	0
3551	3551	1	18	3	1	23	756	28	4	0
3552	3552	0	2	0	0	2	271	16	1	0
3553	3553	0	0	0	0	0	269	18	0	0
3554	3554	0	1	1	0	2	569	33	2	1
3556	3556	0	7	3	0	10	570	30	2	0
3558	3558	0	0	0	0	0	153	30	0	0
3559	3559	0	2	0	0	2	272	35	1	1
3560	3560	0	2	6	0	8	551	44	2	1
3561	3561	0	2	4	2	8	369	56	3	0
3562	3562	0	0	0	0	0	152	15	0	0
3563	3563	0	0	0	0	0	378	21	0	0
3565	3565	0	0	0	0	0	153	16	0	0
3566	3566	0	1	5	1	7	825	26	3	0
3567	3567	0	0	0	0	0	134	17	0	0
3568	3568	0	0	1	0	1	420	25	1	0
3569	3569	0	1	0	0	1	212	18	1	0
3570	3570	0	1	0	0	1	468	24	1	1
3572	3572	0	11	7	0	18	918	34	2	0
3574	3574	0	0	0	0	0	177	5	0	0
3575	3575	0	1	3	0	4	459	12	2	0
3576	3576	0	0	0	0	0	99	10	0	0
3577	3577	0	0	0	0	0	350	10	0	1
3578	3578	0	0	1	0	1	144	2	1	0
3579	3579	0	4	0	0	4	360	10	1	0
3581	3581	0	2	1	0	3	521	6	2	1
3586	3586	0	0	0	0	0	178	4	0	0
3587	3587	0	0	2	0	2	578	13	1	1
3588	3588	0	2	0	0	2	325	11	1	0
3589	3589	0	0	0	0	0	199	2	0	0
3592	3592	0	0	0	0	0	253	8	0	0
3593	3593	0	2	0	0	2	328	12	1	0
3594	3594	0	0	0	0	0	662	21	0	0
3595	3595	0	1	1	0	2	862	15	2	0
3596	3596	0	0	0	0	0	146	3	0	0
3597	3597	0	1	0	1	2	427	13	2	0
3598	3598	0	0	0	0	0	380	6	0	0
3600	3600	0	0	0	0	0	162	2	0	0
3601	3601	0	0	1	0	1	267	6	1	0
3603	3603	0	9	0	0	9	1332	2	1	0
3604	3604	0	0	0	1	1	255	1	1	0
3605	3605	0	0	0	0	0	155	3	0	0
3606	3606	0	0	1	2	3	193	3	2	1
3607	3607	0	15	0	0	15	660	0	1	0
3608	3608	0	1	0	8	9	390	4	2	0
3609	3609	4	28	16	9	57	898	6	4	0
3611	3611	0	5	0	10	15	452	12	2	0
3612	3612	1	2	0	7	10	336	0	3	0
3613	3613	0	2	0	1	3	288	0	2	0
3614	3614	0	4	0	6	10	599	0	2	0
3615	3615	3	5	1	17	26	514	0	4	0
3617	3617	0	1	0	0	1	797	0	1	0
3619	3619	2	77	3	3	85	918	8	4	0
3621	3621	0	2	0	0	2	422	5	1	0
3622	3622	0	0	0	0	0	280	2	0	1
3623	3623	0	3	0	0	3	366	4	1	0
3624	3624	0	0	0	0	0	426	6	0	1
3625	3625	0	2	0	0	2	407	4	1	1
3626	3626	0	0	0	0	0	352	5	0	0
3627	3627	0	0	0	0	0	98	1	0	0
3628	3628	0	1	0	0	1	399	0	1	0
3630	3630	0	0	0	0	0	110	17	0	0
3631	3631	0	3	3	1	7	977	0	3	0
3632	3632	0	0	1	5	6	412	0	2	0
3633	3633	0	0	1	4	5	913	0	2	0
3635	3635	1	4	6	2	13	1189	11	4	0
3636	3636	0	12	11	5	28	1258	2	3	0
3638	3638	0	0	0	3	3	277	0	1	0
3640	3640	0	0	0	0	0	131	52	0	0
3643	3643	1	17	11	3	32	1382	23	4	0
3645	3645	0	0	1	0	1	1297	0	1	0
3646	3646	2	4	2	15	23	445	9	4	0
3651	3651	0	3	0	0	3	283	0	1	1
3652	3652	0	0	0	4	4	584	0	1	1
3654	3654	0	10	0	5	15	712	51	2	0
3655	3655	0	20	1	5	26	1091	40	3	0
3656	3656	0	1	0	0	1	625	9	1	0
3658	3658	0	1	1	18	20	963	0	3	0
3659	3659	0	0	1	0	1	325	9	1	0
3660	3660	5	0	0	0	5	349	4	1	1
3661	3661	0	13	0	2	15	427	6	2	0
3662	3662	0	0	1	5	6	451	5	2	1
3663	3663	0	2	1	2	5	514	1	3	1
3664	3664	0	0	0	1	1	467	1	1	0
3665	3665	1	7	0	5	13	516	6	3	0
3667	3667	2	51	12	0	65	1242	27	3	0
3670	3670	0	1	0	0	1	349	0	1	1
3672	3672	0	0	0	0	0	1179	31	0	0
3673	3673	0	3	0	2	5	1181	26	2	0
3674	3674	0	0	1	0	1	1039	34	1	0
3675	3675	0	2	1	1	4	1051	24	3	0
3676	3676	0	3	1	2	6	1032	34	3	0
3678	3678	0	2	0	2	4	1049	18	2	0
3679	3679	0	0	0	1	1	1141	13	1	1
3680	3680	1	1	0	0	2	1035	20	2	0
3681	3681	0	0	0	0	0	1161	6	0	0
3682	3682	0	0	2	0	2	1179	7	1	0
3683	3683	0	2	0	0	2	1170	10	1	0
3684	3684	0	3	0	0	3	1152	37	1	0
3685	3685	0	3	2	7	12	1048	80	3	0
3687	3687	0	0	0	0	0	1163	8	0	1
3688	3688	0	4	4	7	15	801	163	3	0
3689	3689	0	5	0	1	6	769	48	2	1
3690	3690	0	4	2	0	6	788	88	2	0
3691	3691	0	47	16	15	78	1822	26	3	1
3692	3692	0	8	1	0	9	245	2	2	0
3693	3693	1	4	2	1	8	799	19	4	0
3694	3694	0	0	1	0	1	788	10	1	0
3695	3695	0	3	3	8	14	798	10	3	0
3696	3696	0	0	1	0	1	769	7	1	0
3697	3697	0	3	1	0	4	911	0	2	0
3698	3698	0	2	1	0	3	946	0	2	0
3699	3699	1	0	0	0	1	890	0	1	0
3702	3702	1	1	6	0	8	620	6	3	0
3703	3703	0	0	0	12	12	705	2	1	0
3704	3704	0	0	1	3	4	194	0	2	0
3705	3705	0	1	0	0	1	414	0	1	1
3706	3706	0	1	0	0	1	461	0	1	0
3707	3707	0	6	1	0	7	946	0	2	0
3708	3708	1	9	4	0	14	2710	1	3	0
3709	3709	1	5	1	1	8	2701	0	4	0
3710	3710	0	9	2	22	33	2671	1	3	0
3712	3712	1	2	0	1	4	426	0	3	0
3714	3714	0	0	0	0	0	1238	3	0	0
3716	3716	0	6	4	5	15	1154	121	3	0
3717	3717	0	1	15	0	16	1132	111	2	0
3718	3718	0	4	5	3	12	1124	56	3	1
3720	3720	1	3	1	0	5	1246	0	3	0
3725	3725	3	15	1	1	20	331	33	4	0
3726	3726	0	7	0	2	9	347	3	2	1
3727	3727	0	5	0	1	6	347	3	2	1
3728	3728	0	10	13	7	30	745	7	3	1
3730	3730	0	0	2	0	2	680	0	1	1
3732	3732	0	0	2	1	3	267	0	2	0
3735	3735	3	3	0	5	11	625	1	3	1
3736	3736	0	2	0	0	2	495	1	1	0
3737	3737	0	5	4	0	9	499	1	2	0
3738	3738	0	1	5	0	6	575	0	2	0
3739	3739	0	4	0	0	4	653	0	1	0
3741	3741	1	3	0	0	4	613	0	2	0
3742	3742	0	2	0	0	2	529	0	1	0
3745	3745	0	17	2	0	19	858	0	2	0
3746	3746	0	0	1	0	1	585	0	1	0
3748	3748	0	0	1	0	1	757	0	1	0
3749	3749	0	4	0	0	4	635	0	1	0
3751	3751	0	6	1	0	7	630	0	2	0
[truncated: 10,823 more rows]
