# Supplementary material for: Dual Coordination of Post Translational Modifications in Human Protein Networks
Source: PLoS Comput Biol. 2013 Mar 7;9(3):e1002933. doi: 10.1371/journal.pcbi.1002933 (PMC3591266; doi:10.1371/journal.pcbi.1002933)
Supplement: Dataset S2 — Annotated protein complex dataset. (XLSX) [file pcbi.1002933.s002.xlsx]

## Sheet: Analysis_Raw_data
Enriched Complexes Code	ComplexID	ComplexName	Complex EGIDs	Complex_Lengths	Acetylation Median	Acetylation Total	pY Median	pY Total	pS / pT Median	pS / pT Total	Ubiquitination Median	Ubiquitination Total	Length Median	Length Total	Total PTMs	Complex Size			Enriched Complexes Code	PTM
A	65780	Nucleosome with Deacetylated H4 and H3 Dimethylated at Lysine-9	3018;474382;3014;8350;8294	126;115;143;136;103	6	31	2	9	7	29	5	19	126	623	88	5			A	Ac
A	115547	HES1/PARP1/Cbp	1387;142;3280	2442;1014;280	11	29	1	6	9	33	2	23	1014	3736	91	3			B	pY
A	167153	CBP/p300/CREB	1385;1387;2033	341;2442;2414	18	90	5	13	20	57	1	4	2414	5197	164	3			C	Ub
A	172352	p300/CBP/Pitx2	1387;2033;5308	2442;2414;324	18	90	5	13	20	47	1	2	2414	5180	152	3			D	pST
A	794534	BAHD1	10155;11335;22893;3065;3066	835;183;780;482;582	6	23	1	8	6	66	8	51	582	2862	148	5
A	523172	CREBBP-SMAD3-SMAD4 pentameric complex	1387;4088;4089	2442;425;552	5	26	0	5	10	35	1	4	552	3419	70	3
A	532635	p300-CBP-p270 complex	1387;2033;8289	2442;2414;2285	18	94	5	16	22	71	1	4	2414	7141	185	3
A	528190	NCOR-SIN3-HDAC1 complex	25942;3065;9612	1273;482;2524	8	22	3	9	14	100	4	12	1273	4279	143	3
A	168482	HIF-1-alpha/ARNT/CREB/p300/JAB1/c-JUN	10987;1385;2033;3091;3725;405	334;341;2414;826;331;789	2.5	80	1	11	11	62	1.5	29	565	5035	182	6
A	529118	MTA2 complex	1108;23309;25942;3065;3066;53615;5928;5931;9219	1912;1162;1273;482;582;291;425;425;668	3	35	1	14	7	99	6	49	582	7220	197	9
A	526512	MeCP1 complex	1108;3065;3066;53615;5928;5931;8932;9219	1912;482;582;291;425;425;411;668	2.5	31	0.5	9	6.5	84	6.5	44	453.5	5196	168	8
A	171464	Estrogen/ER alpha/Estrogen/ER alpha/GRIP1/CARM1/p300(Me)/CBP(Me)	10498;1387;2033;2099;23426	608;2442;2414;595;1076	8	98	3	16	20	68	1	5	1076	7135	187	5
A	114350	Telomerase/Nucleolin	10728;1736;3320;4691;7015	160;514;854;710;1132	5	52	1	15	11	71	7	58	710	3370	196	5
A	122103	GR alpha/HSP90/FKBP51/HSP90	2289;2908;3320	457;778;854	4	28	2	12	15	33	4	34	778	2089	107	3
A	524311	SRC-1 complex	10499;1387;6738;8648	1464;2442;538;1441	3.5	25	0.5	6	16.5	58	0.5	8	1452.5	5885	97	4
A	523166	CREBBP-SMAD2-SMAD4 pentameric complex	1387;4087;4089	2442;467;552	5	27	1	6	14	39	1	4	552	3461	76	3
A	795638	ASCOM	11091;203068;23054;58508;5929;7846;8085;9070	334;444;2063;4911;538;451;5537;628	2	37	2	27	10	102	1	32	583	14906	198	8
A	119999	MYC/Max/Cbp/p300	2033;4149;4609	2414;160;454	7	83	3	11	15	46	1	8	454	3028	148	3
A	523574	ING4 complex (ING4; MYST2; C1orf149; PHF16)	11143;51147;64769;9767	611;249;201;823	4.5	20	1	5	7.5	42	0.5	4	430	1884	71	4
A	129602	RARs/TIF2/Cbp/p300/PCAF/9cRA	10499;1387;5915;8850	1464;2442;448;832	6.5	31	0.5	6	7	35	0	1	1148	5186	73	4
A	117332	HIF2A/ARNT/Cbp/p300	2033;2034;405	2414;870;789	3	75	1	10	3	27	1	6	870	4073	118	3
A	172050	Topo II/HMG1/HMG2/Histone H1/CAD	1677;3008;3146;3148	338;219;215;209	10.5	36	1.5	6	5	21	10	38	217	981	101	4
A	197096	STAT3:p300:Smad1:Smad4	1387;2033;4086;4089;6774	2442;2414;465;552;770	5	98	5	20	9	63	3	17	770	6643	198	5
A	127156	Glucocorticoid receptor/Hsp90/HDAC6	10013;2908;3320	1215;778;854	4	28	1	11	15	35	1	31	854	2847	105	3
A	13164	Nucleosome	3018;474382;8350;3014;8294	126;115;136;143;103	6	31	2	9	7	29	5	19	126	623	88	5
A	172383	TFIID/RPA/JNK/p300	2033;5599;6117;6872	2414;427;616;1893	2.5	77	3	16	8.5	44	1	20	1254.5	5350	157	4
A	529030	17S U2 snRNP	10131;10262;10285;10291;10362;10523;10946;10992;11338;1665;22826;22827;23350;23450;23451;3329;51639;6426;6627;6628;6629;6632;6633;6634;6635;6636;6637;7307;8175;83443;84844;84991;9879	704;424;238;793;317;916;501;895;475;795;253;559;1029;1217;1304;573;125;248;255;240;225;119;118;126;92;86;76;240;464;86;110;401;1031	1	85	1	54	3	223	3	149	317	15035	511	33
A	198709	Raf_p:14-3-3	10971;2810;7529;7531;7532;7533;7534	245;248;246;255;247;246;245	4	26	1	10	6	43	10	66	246	1732	145	7
A	132736	NuRD/MBD3 Complex/GATA1/Fog1	1107;1108;161882;2623;3065;3066;53615;54815;57459;5928;5931;9219	2059;1912;1006;413;482;582;291;490;593;425;425;668	2.5	41	1	16	9	148	2.5	50	536	9346	255	12
A	530843	p300/CBP-PCAF-MyoD complex	1387;2033;4654;8850	2442;2414;320;832	13	102	3	14	11	45	0.5	2	1623	6008	163	4
A	525298	PIAS3-SMAD3-P300 complex	10401;2033;4088	628;2414;425	3	75	0	8	10	32	1	2	628	3467	117	3
A	122020	NuRD Complex	1107;1108;3065;3066;53615;54815;57459;5928;5931;8932;9219	2059;1912;482;582;291;490;593;425;425;411;668	2	36	1	11	7	130	3	50	490	8338	227	11
A	114294	NF kappa B1 p50/RelA/Cbp	1387;4790;5970	2442;969;551	7	28	2	7	16	46	1	6	969	3962	87	3
A	63408	Meiotic D-loop Complex	1019;11144;3014;3018;472;5888;6117;6118;6119;675;8350;8294	303;340;143;126;3056;340;616;270;121;3418;136;103	1	38	2	20	6	85	4	57	286.5	8972	200	12
A	522808	snRNP-free U1A (SF-A) complex	1655;4841;6421;6626	614;471;707;282	6	22	3.5	15	7.5	25	11	45	542.5	2074	107	4
A	169412	ER alpha/ER alpha/GRIP1/CARM1/p300	10498;2033;2099;23426	608;2414;595;1076	4	80	1.5	11	12	48	1	4	842	4693	143	4
A	48510	Ub-ERBB2:ERBB2IP:HSP90:CDC37	11140;2064;3320;55914;6233;7311;7314;7316	378;1255;854;1302;156;128;229;685	3	45	1	43	4	74	8	85	531.5	4987	247	8
A	58461	Serum amyloid P-component pentamer:Double-stranded DNA	3018;325;474382;3014;8294;8350	126;223;115;143;103;136	5	31	2	9	6	32	2.5	19	131	846	91	6
A	526429	CTCF-nucleophosmin-PARP-HIS-KPNA-LMNA-TOP complex	10664;142;3014;3836;3839;4000;4869;7153	727;1014;143;538;521;664;294;1531	2.5	42	1	11	10.5	160	9	109	601	5432	322	8
A	522091	HSP90-CIP1-FKBPL complex	1026;3320;63943	164;854;349	4	28	0	10	8	25	6	36	349	1367	99	3
A	531275	ASCOM complex	203068;23054;58508;5929;7277;8085;9070	444;2063;4911;538;448;5537;628	3	34	3	30	11	102	1	25	628	14569	191	7
A	528217	RNA polymerase II complex; incomplete (CBP; RPBI; PCAF; BAF47); chromatin structure modifying	1387;5430;6598;8850	2442;1970;385;832	5	28	3	18	11	68	2	38	1401	5629	152	4
A	2829	Nucleosome with H3 dimethylated at lysine-9: HP1gamma Complex	11335;3018;474382;3014;8350;8294	183;126;115;143;136;103	6	37	2	9	7.5	38	5.5	27	131	806	111	6
A	64414	Nucleosome containing Histone H2A.x	3014;3018;8350;8294	143;126;136;103	7	31	2	9	7.5	29	5.5	19	131	508	88	4
A	129291	p53 (tetramer)/Drosha/DGCR8/p68 helicase	1655;29102;54487;7157	614;1374;773;393	4.5	22	1	8	9	52	8.5	35	693.5	3154	117	4
A	122849	p53/Cbp/p300/CARM1/PRMT1 (tetramer)	10498;1387;3276;7157	608;2442;371;393	6.5	31	0.5	6	11	51	5	29	500.5	3814	117	4
A	58206	p-EGFR mutants:p-Y349;350-SHC1:GRB2:SOS1	11140;1956;2885;3320;6464;6654	378;1210;217;854;584;1333	3.5	36	4	37	9	70	8	64	719	4576	207	6
A	64184	Centromeric Nucleosome	1058;3018;474382;3014;8294	140;126;115;143;103	4	23	2	7	6	27	0	11	126	627	68	5
A	524404	ING5 complex	11143;23338;23522;23774;27154;64769;7862;7994;79960;84289;9767	611;790;2073;1058;1205;201;1220;2004;842;240;823	4	43	1	12	9	111	0	6	842	11067	172	11
A	525790	H2AX complex II	8350;3014;3018;3309;4869;55037;811;8531;8294	136;143;126;654;294;689;417;372;103	8	73	2	16	7	78	7	71	294	2934	238	9
A	114305	NF kappa B1 p50/RelA/Cbp/cortisol/GR alpha (monomer)/HDAC2	2033;2908;3066;4790;5970	2414;778;582;969;551	4	88	1	11	15	68	1	13	778	5294	180	5
A	131602	NuRD/MBD2/PRMT5 Complex	10419;1107;1108;3065;3066;54815;57459;5928;5931;79084;8932;9219	637;2059;1912;482;582;490;593;425;425;342;411;668	2	35	1	18	6.5	126	4.5	58	536	9026	237	12
A	533609	DNA double-strand break end-joining complex	10111;2547;3981;4361;4683;7518;7520	1312;609;911;708;754;336;732	3	35	1	8	10	76	7	91	732	5362	210	7
A	131042	RB1/E2F1-3/DP/HDAC1/DNMT1	1786;1871;3065;5925;7027	1632;465;482;928;410	7	27	1	11	6	56	2	25	482	3917	119	5
A	795465	ING4-TAP	11143;23338;51147;64769;79960;9767	611;790;249;201;842;823	3.5	24	0.5	6	7.5	55	0	4	700.5	3516	89	6
A	122558	LKB1/CDC37/HSP90	11140;3320;6794	378;854;433	9	38	1	11	10	28	10	40	433	1665	117	3
A	128077	MYOD/Cbp/p300/Myb	2033;4602;4654	2414;761;320	4	79	0	8	3	27	0	1	761	3495	115	3
A	121107	E2/ERA (dimer)/Src-1/p300	2033;2099;8648	2414;595;1441	8	80	3	11	22	65	1	2	1441	4450	158	3
A	794961	2A-DUB	114803;1915;203068;3187;3832;8241;8805;8850;3303	828;462;444;449;1056;930;1050;832;641	2	39	5	42	10	90	7	84	828	6692	255	9
A	131442	Telomerase/EST1B	10728;1736;23381;3320;7015	160;514;1016;854;1132	2	33	1	12	6	37	5	42	854	3676	124	5
A	524590	SWI/SNF chromatin-remodeling complex	25942;3065;4204;6595;6605	1273;482;498;1590;411	5	25	3	12	11	61	5	25	498	4254	123	5
A	533913	ING1-p300-PCNA complex	2033;3621;5111	2414;422;261	3	75	2	10	2	24	1	10	422	3097	119	3
A	249440	GAPDH forms a complex with SYNCRIP; EPRS and RPL13A	10492;2058;23521;2597	623;1512;203;335	6.5	25	3	12	11	40	15	61	479	2673	138	4
A	120500	HIF1A/ARNT/Cbp/p300	2033;3091;405	2414;826;789	3	75	1	9	7	32	1	15	826	4029	131	3
A	168924	Nmi/p300/CBP	1387;2033;9111	2442;2414;307	18	90	5	13	20	43	1	4	2414	5163	150	3
A	38092	eNOS:CaM:HSP90	3320;4846;805	854;1203;149	4	28	2	14	8	29	4	37	854	2206	108	3
A	185661	PCAF;SMAD1;EP300	2033;4086;8850	2414;465;832	8	80	1	9	9	32	1	4	832	3711	125	3
A	197009	R-smad:smad4 complex:Coactivator:responsive element	1387;2033;4086;4087;4088;4089;4090;4093;55534;6597;7490;84441;9794	2442;2414;465;467;425;552;465;467;1133;1679;517;1156;1016	3	110	0	18	5	122	0	19	552	13198	269	13
A	115167	RBPJ/NICD/MAML1-2/p300	2033;3516;4851;84441	2414;500;2555;1156	0.5	73	1	10	4	30	0.5	2	1785	6625	115	4
A	206172	BAD_p:14-3-3	10971;2810;572;7529;7531;7532;7533;7534	245;248;168;246;255;247;246;245	3.5	27	1.5	12	6	57	8	66	246	1900	162	8
A	120315	TCF4E/beta catenin/p300	1499;2033;6934	781;2414;596	3	77	8	18	22	49	3	17	781	3791	161	3
A	203951	Notch(ICN):CBF1:CoA	1387;2033;3516;4851;4853;4854;4855;55534;84441;9794	2442;2414;500;2555;2471;2321;2003;1133;1156;1016	0.5	96	0	15	3	75	0.5	5	2162	18011	191	10
A	172043	Topo II/HMG1/HMG2/Histone H1	3146;3148;8971	215;209;213	10	26	2	5	5	13	7	22	213	637	66	3
A	123861	RARs/Src-1/Cbp/p300/PCAF/9cRA	2033;5916;8648;8850	2414;454;1441;832	4	80	0.5	9	12	48	0	1	1136.5	5141	138	4
A	171946	RELA/p50/ATF-2/IRF/c-JUN/HMG1/PCAF/CBP	1386;1387;3146;3665;3725;5970;8850	505;2442;215;516;331;551;832	7	49	1	10	10	75	1	21	516	5392	155	7
A	63733	ROR-alpha:Coactivator	10891;2033;6095	798;2414;556	9	81	0	8	4	27	0	1	798	3768	117	3
A	528929	BAF complex	51412;57492;60;6595;6597;6598;6599;6601;6602;6605;71;8289;86	426;2231;375;1590;1679;385;1105;1214;515;411;375;2285;429	2	36	2	41	9	153	6	83	515	13020	313	13
A	114112	Telomerase	10728;1736;3320;7015	160;514;854;1132	3.5	31	1	12	8.5	37	6	42	684	2660	122	4
A	123199	NuRD/MBD3/MBD3L2 Complex	1107;1108;125997;3065;3066;53615;54815;57459;5928;5931;9219	2059;1912;208;482;582;291;490;593;425;425;668	2	35	1	11	7	128	3	50	490	8135	224	11
A	133516	Telomerase/AKT1/mTOR/p70S6K	10728;1736;207;2475;3320;6198;7015	160;514;480;2549;854;525;1132	2	34	1	19	11	90	5	56	525	6214	199	7
A	130888	RARs/AIB1/Cbp/p300/PCAF/9cRA	1387;5916;8202;8850	2442;454;1424;832	6	30	1	7	11	51	0	1	1128	5152	89	4
A	522039	H2AX complex I	8350;142;22907;3014;3309;4869;811	136;1014;1194;143;654;294;417	9	62	2	10	7	60	8	75	417	3852	207	7
A	199632	14-3-3:Bax	10971;2810;581;7529;7531;7532;7533;7534	245;248;218;246;255;247;246;245	3.5	26	1	10	6	47	8	68	246	1950	151	8
A	171220	RELA/p50/ATF-2/IRF/c-JUN/HMG1/PCAF	1386;3146;3662;3725;5970;8850	505;215;451;331;551;832	5	30	1	6	7.5	48	1	20	478	2885	104	6
A	527026	P53-BARD1-Ku70 complex	2547;580;7157	609;777;393	12	27	0	4	14	56	18	51	609	1779	138	3
A	58175	p-EGFR mutants:GRB2:SOS1	11140;1956;2885;3320;6654	378;1210;217;854;1333	4	36	5	34	12	64	10	63	854	3992	197	5
A	132723	NuRD/MBD3 Complex	1107;1108;3065;3066;53615;54815;57459;5928;5931;9219	2059;1912;482;582;291;490;593;425;425;668	2.5	35	1	11	9	128	4.5	50	536	7927	224	10
A	31427	CSL NICD coactivator complex	1387;22938;3516;4853;55534;8850	2442;536;500;2471;1133;832	1.5	30	0.5	12	2	44	0	2	982.5	7914	88	6
A	13208	Extended And Processed Telomere End and Associated DNA Binding and Packaging Protein Complex Folded Into Higher Order Structure	25913;26277;3018;474382;54386;65057;7013;7014;8350;3014;8294	634;451;126;115;399;544;439;500;136;143;103	0	35	0	10	6	59	2	31	399	3590	135	11
A	795077	Sin3-CI	25942;3065;3066;3621;5926;5928;5931;6597;6598;6599;6601;6602;86;8819	1273;482;582;422;1257;425;425;1679;385;1105;1214;515;429;220	1.5	33	1	13	5.5	117	5	72	498.5	10413	235	14
A	167561	SMAD3/SMAD4/p300/CBP	1387;2033;4088;4089	2442;2414;425;552	11.5	98	2.5	13	15	57	1	5	1483	5833	173	4
A	794684	NuRD.2	1108;3065;3066;53615;57504;5928;5931;9219	1912;482;582;291;515;425;425;668	2.5	30	1	10	6.5	85	6.5	45	498.5	5300	170	8
A	533966	DNMT3B complex	10051;10592;1789;24137;25942;285643;3065;8467	1288;1197;853;1232;1273;1234;482;1052	2.5	31	1	14	11	105	4.5	45	1214.5	8611	195	8
A	58050	Ligand-responsive EGFR mutants resistant to non-covalent TKIs:HSP90:CDC37	11140;1956;3320	378;1210;854	5	32	10	27	16	51	17	57	854	2442	167	3
A	13236	Unsynapsed Chromatin	10274;10388;10734;10735;27127;3014;3018;50511;5885;8243;8350;8294;9126;9985	1258;1530;1225;1268;1235;143;126;236;631;1233;136;103;1217;547	2	47	2	32	7.5	96	3	87	924	10888	262	14
A	531938	CBF1-HDAC1-SMRT complex	3065;3516;9612	482;500;2524	8	18	1	6	6	87	0	8	500	3506	119	3
A	169308	p300/CBP/RELA/p50	1387;2033;5970	2442;2414;551	18	97	5	13	20	52	1	2	2414	5407	164	3
A	13255	Synaptonemal:BRCA1 Complex	10274;10388;10734;10735;27127;3014;3018;50511;5885;672;8243;8350;9126;9985;8294	1258;1530;1225;1268;1235;143;126;236;631;1884;1233;136;1217;547;103	1	47	2	32	8	147	3	90	1217	12772	316	15
A	118546	Telomerase/hnRNP C1/C2	10728;1736;3183;3320;7015	160;514;306;854;1132	4	35	1	17	11	59	7	59	514	2966	170	5
A	13278	Synaptonemal:BRCA1:ATR Complex	10274;10388;10734;10735;27127;3014;3018;50511;545;5885;672;8243;8350;8294;9126;9985	1258;1530;1225;1268;1235;143;126;236;2644;631;1884;1233;136;103;1217;547	1	47	2	36	8	155	4	99	1221	15416	337	16
A	168184	SMAD2/SMAD2/SMAD4/p300/CBP	1387;2033;4087;4089	2442;2414;467;552	11.5	99	3	14	17	61	1	5	1483	5875	179	4
A	127613	NuRD/MBD2 Complex (MeCP1)	1107;1108;3065;3066;54815;57459;5928;5931;8932;9219	2059;1912;482;582;490;593;425;425;411;668	2.5	34	1	11	9	123	4.5	49	536	8047	217	10
A	524598	TCF4-CTNNB1-EP300 complex	1499;2033;6925	781;2414;671	3	75	8	18	22	50	1	14	781	3866	157	3
A	527211	HERP1/HEY2-NCOR-SIN3A complex	23493;25942;3065;9612	337;1273;482;2524	6.5	22	2	9	10	101	2	12	877.5	4616	144	4
A	524615	TNF-alpha/NF-kappa B signaling complex 8	11140;2289;3320;3326;3895;9641	378;457;854;724;1357;716	4	45	1.5	23	8	50	7	88	720	4486	206	6
A	531142	CAMK2-delta-MASH1 promoter-coactivator complex	1387;142;3280;4841;5430;6714;817;8850	2442;1014;280;471;1970;536;499;832	4.5	46	1	28	10	119	2	73	684	8044	266	8
A	525533	DNMT1-RB1-HDAC1-E2F1 complex	1786;1869;3065;5925	1632;437;482;928	7	26	2	10	12	59	5	23	705	3479	118	4
A	168943	TFIID/RPA/JNK/p300/p53	2033;5599;6117;6872;7157	2414;427;616;1893;393	4	90	3	16	9	73	1	38	616	5743	217	5
A	258409	RELA and CREBBP complex with the IFNB1 promoter	1387;3456;5970	2442;187;551	7	25	0	5	10	31	0	1	551	3180	62	3
A	125763	ERA/MTA1/HDAC1/LMO4	2099;3065;8543;9112	595;482;165;715	4.5	18	1	5	9.5	39	3	14	538.5	1957	76	4
A	205519	CBP:beta-catenin	1387;1499;2033	2442;781;2414	18	93	8	23	22	64	1	15	2414	5637	195	3
A	527077	NCOR-SIN3-HDAC-HESX1 complex	23309;25942;3065;3066;8820;9612	1162;1273;482;582;185;2524	3.5	24	1.5	12	5.5	108	2.5	20	872	6208	164	6
A	168758	SET/NME1/HMG2/Ape1/pp32	3148;328;4830;4831;6418;654364;8125	209;318;177;152;290;267;249	5	39	1	10	5	28	7	39	249	1662	116	7
A	528345	ESR1-RELA-BCL3-NCOA3 complex	2099;5970;602;8202	595;551;454;1424	5.5	19	0.5	4	15	60	0.5	3	573	3024	86	4
A	168930	STAT5/STAT5/Nmi/p300/CBP	1387;2033;6776;9111	2442;2414;794;307	10	92	5	18	12.5	48	1	5	1604	5957	163	4
A	119793	cortisol/GR alpha (dimer)/Hsp90/FKBP52/HSP90	2288;2908;3320	459;778;854	4	30	6	16	15	35	14	44	778	2091	125	3
AB	58234	p-EGFR mutants:GRB2:GAB1:PI3K	11140;1956;2549;2885;3320;5290;5295	378;1210;724;217;854;1068;724	3	37	10	60	6	74	6	63	724	5175	234	7
AB	58223	p-EGFR mutants:GRB2:GAB1:PIK3R1	11140;1956;2549;2885;3320;5295	378;1210;724;217;854;724	3.5	37	11.5	59	10.5	73	8	63	724	4107	232	6
ABC	531944	Profilin 1 complex	1213;3312;347733;5216;60;71;7415	1675;646;445;140;375;375;806	5	55	9	56	9	106	11	137	445	4462	354	7
ABC	58271	Ligand-responsive p-6Y-EGFR mutants:CBL	11140;1956;3320;867	378;1210;854;906	4	33	10	37	13.5	62	13.5	57	880	3348	189	4
ABC	58252	p-EGFR mutants:PLCG1	11140;1956;3320;5335	378;1210;854;1290	4	32	12	41	11.5	58	13.5	63	1032	3732	194	4
ABCD	258463	NFAT5 forms a complex with PRKDC; DHX9; DDX21; XRCC5; HNRNPM; HSPA8; HNRNPK; HNRNPF; and HSP90AB1	10725;1660;3185;3190;3312;3326;4670;5591;7520;9188	1549;1270;415;464;646;724;730;4128;732;783	3	62	5	52	15.5	151	17.5	271	731	11441	536	10
ABCD	251355	NFAT5 forms a complex with DHX9; PARP1; EFTUD2; DDX21; HNRNPF; HNRNPM; DDX17; HSPA8; PRKDC; HSP90AB1; SNRNP200; XRCC5; HNRNPK; HNRNPU	10521;10725;142;1660;23020;3185;3190;3192;3312;3326;4670;5591;7520;9188;9343	731;1549;1014;1270;2136;415;464;825;646;724;730;4128;732;783;972	3	94	5	79	14	201	18	345	783	17119	719	15
ABCD	65471	hnRNP proteins	10236;10949;220988;27316;3178;3181;3183;3184;3185;3187;3188;3190;3191;3192;4670;5093;5094;5725	636;305;378;391;372;353;306;355;415;449;449;464;589;825;730;356;366;557	3.5	60	6	109	10.5	215	8	171	403	8296	555	18
ABCD	533694	C complex spliceosome	10189;10236;10250;10283;10291;10450;10492;10569;10594;10946;10992;1655;1659;220988;22913;22938;23020;23398;23450;23451;23517;23524;24144;24148;2483;25949;26986;27258;27316;27339;3178;3181;3183;3185;3187;3190;3192;4116;4670;51340;51362;51428;51503;51645;5356;53938;5411;55094;55596;55696;56949;57461;57703;57819;58509;60625;6426;6627;6628;6629;6632;6633;6634;6635;6636;6637;7307;8175;8220;84292;8899;…	264;636;904;472;793;301;623;586;2335;501;895;614;1220;378;306;536;2136;646;1217;1304;1042;2752;837;941;258;243;636;102;391;504;372;353;306;415;449;464;825;146;730;848;579;622;229;166;514;165;717;931;707;420;855;285;908;95;758;703;248;255;240;225;119;118;126;92;86;76;240;464;476;315;1007;800;972;357;820;1485;411;1227;802;174	1	131	1	209	5.5	1208	3	465	502.5	49070	2013	80
ABCD	31889	Spliceosomal B Complex	10181;10189;10236;10250;10262;10291;10421;10594;10907;10921;10946;10949;10992;11100;11338;1660;220988;22826;22916;23020;23450;23451;24148;2521;27316;2962;2963;3178;3181;3183;3184;3185;3187;3188;3190;3191;3192;4670;4686;4799;4809;4904;5093;5094;51362;51639;5430;5431;5432;5433;5434;5435;5436;5437;5438;5439;5440;5441;55749;5725;57794;57819;6426;6427;6428;6429;6430;6431;6432;6625;6626;6627;6628;6629;…	815;264;636;904;424;793;341;2335;142;305;501;305;895;856;475;1270;378;253;156;2136;1217;1304;941;526;391;517;249;372;353;306;355;415;449;449;464;589;825;730;790;1120;128;324;356;366;579;125;1970;1174;275;142;210;127;172;150;125;117;58;67;1150;557;645;95;248;221;164;494;272;344;238;437;282;255;240;225;119;118;126;92;86;76;240;464;1233;86;110;221;522;484;972;357;820;1227	1	134	1.5	256	7.5	901	3.5	565	356.5	46231	1856	92
ABCD	31590	Spliceosomal E Complex	10181;10189;10236;10250;10421;10921;10949;11100;11338;1660;220988;22916;2521;27316;2962;2963;3178;3181;3183;3184;3185;3187;3188;3190;3191;3192;4670;4686;4799;4904;5093;5094;5430;5431;5432;5433;5434;5435;5436;5437;5438;5439;5440;5441;55749;5725;57794;6426;6427;6428;6430;6431;6432;6625;6626;6628;6632;6633;6634;6635;6636;6637;7307;8243;8683	815;264;636;904;341;305;305;856;475;1270;378;156;526;391;517;249;372;353;306;355;415;449;449;464;589;825;730;790;1120;324;356;366;1970;1174;275;142;210;127;172;150;125;117;58;67;1150;557;645;248;221;164;272;344;238;437;282;240;119;118;126;92;86;76;240;1233;221	1	103	2	200	8	696	4	379	341	28347	1378	65
ABCD	32165	Spliceosomal active C complex with lariat containing; 5;-end cleaved pre-mRNP:CBC complex	10181;10189;10236;10250;10262;10291;10421;10594;10907;10914;10921;10946;10949;10978;10992;11051;11100;11338;1477;1478;1479;1660;220988;22826;22916;23020;23450;23451;24148;2521;27316;2962;2963;29894;3178;3181;3183;3184;3185;3187;3188;3190;3191;3192;4670;4686;4799;4809;4904;5093;5094;51362;51585;51639;51692;53981;5430;5431;5432;5433;5434;5435;5436;5437;5438;5439;5440;5441;55749;5725;57794;57819;642…	815;264;636;904;424;793;341;2335;142;745;305;501;305;425;895;227;856;475;431;577;717;1270;378;253;156;2136;1217;1304;941;526;391;517;249;1443;372;353;306;355;415;449;449;464;589;825;730;790;1120;128;324;356;366;579;1555;125;684;782;1970;1174;275;142;210;127;172;150;125;117;58;67;1150;557;645;95;248;221;164;494;272;344;238;483;255;240;225;119;118;126;92;86;76;240;514;306;464;1233;86;110;221;522;48…	1	144	1	273	7	990	3	604	391	54401	2011	103
ABCD	529260	Nop56p-associated pre-rRNA complex	10514;10528;10642;10969;11137;11224;11338;1660;1915;1938;2091;23521;25873;26156;26354;285596;292;3008;3178;3192;3608;3609;4670;4673;4691;4736;4809;4869;4904;51602;51631;55131;55299;55646;55681;59;6122;6124;6125;6128;6129;6130;6132;6133;6134;6135;6136;6137;6138;6139;6141;6142;6143;6144;6146;6147;6152;6154;6155;6156;6157;6158;6159;6160;6161;6165;6168;6170;6173;6175;6176;6181;6187;6189;6194;6201;620…	1332;594;577;306;501;123;475;1270;462;858;321;203;105;490;549;310;298;219;372;825;390;898;730;391;710;217;128;294;324;529;392;759;353;379;929;377;403;427;297;288;248;266;257;192;214;178;165;211;204;184;188;176;196;160;128;156;157;145;136;115;148;169;159;128;135;110;92;51;142;317;114;115;293;264;249;194;208;194;158;132;151;151;145;130;146;135;152;143;289;67;136;655;1488;765;376;455;240;451;451;126…	2	304	1	193	3	764	6.5	744	229.5	36205	2005	106
ABCD	32031	Spliceosomal Intermediate C Complex	10181;10189;10236;10250;10262;10291;10421;10594;10907;10914;10921;10946;10949;10978;10992;11051;11100;11338;1477;1478;1479;1660;220988;22826;22916;23020;23450;23451;24148;2521;27316;2962;2963;29894;3178;3181;3183;3184;3185;3187;3188;3190;3191;3192;4670;4686;4799;4809;4904;5093;5094;51362;51585;51639;51692;53981;5430;5431;5432;5433;5434;5435;5436;5437;5438;5439;5440;5441;55749;5725;57794;57819;642…	815;264;636;904;424;793;341;2335;142;745;305;501;305;425;895;227;856;475;431;577;717;1270;378;253;156;2136;1217;1304;941;526;391;517;249;1443;372;353;306;355;415;449;449;464;589;825;730;790;1120;128;324;356;366;579;1555;125;684;782;1970;1174;275;142;210;127;172;150;125;117;58;67;1150;557;645;95;248;221;164;494;272;344;238;255;240;225;119;118;126;92;86;76;240;514;306;464;1233;86;110;221;522;484;97…	1	142	1	268	7	987	3	604	384.5	53918	2001	102
ABCD	32287	Exon Junction Complex	10181;10189;10236;10250;10262;10291;10421;10594;10907;10914;10921;10946;10949;10978;10992;11051;11100;11338;1477;1478;1479;1660;220988;22826;22916;23020;23450;23451;24148;2521;27316;2962;2963;29894;3178;3181;3183;3184;3185;3187;3188;3190;3191;3192;4116;4670;4686;4799;4809;4904;5093;5094;51362;51585;51639;51692;53981;5430;5431;5432;5433;5434;5435;5436;5437;5438;5439;5440;5441;55749;5725;57794;5781…	815;264;636;904;424;793;341;2335;142;745;305;501;305;425;895;227;856;475;431;577;717;1270;378;253;156;2136;1217;1304;941;526;391;517;249;1443;372;353;306;355;415;449;449;464;589;825;146;730;790;1120;128;324;356;366;579;1555;125;684;782;1970;1174;275;142;210;127;172;150;125;117;58;67;1150;557;645;95;248;221;164;494;272;344;238;483;255;240;225;119;118;126;92;86;76;240;514;306;464;1233;86;110;221;52…	1	145	1	277	6	997	3	609	378	54721	2028	105
ABCD	529651	SNW1 complex	10061;10594;1642;1915;1937;203068;22938;23020;3192;3309;4436;51366;5211;6421;8805;9343;9416;9782;988	634;2335;1140;462;437;444;536;2136;825;654;934;2799;780;707;1050;972;820;847;802	3	82	4	86	7	228	12	263	820	19314	659	19
ABCD	31743	Spliceosomal A Complex	10181;10189;10236;10250;10262;10291;10421;10921;10946;10949;10992;11100;11338;1660;220988;22826;22916;23450;23451;2521;27316;2962;2963;3178;3181;3183;3184;3185;3187;3188;3190;3191;3192;4670;4686;4799;4904;5093;5094;51362;51639;5430;5431;5432;5433;5434;5435;5436;5437;5438;5439;5440;5441;55749;5725;57794;6426;6427;6428;6429;6430;6431;6432;6625;6626;6627;6628;6629;6632;6633;6634;6635;6636;6637;7307;…	815;264;636;904;424;793;341;305;501;305;895;856;475;1270;378;253;156;1217;1304;526;391;517;249;372;353;306;355;415;449;449;464;589;825;730;790;1120;324;356;366;579;125;1970;1174;275;142;210;127;172;150;125;117;58;67;1150;557;645;248;221;164;494;272;344;238;437;282;255;240;225;119;118;126;92;86;76;240;464;1233;86;110;221;484;1227	1	126	1.5	229	8	864	3.5	461	354	37783	1680	82
ABCD	532914	Spliceosome	10189;10250;10262;10285;10286;10291;10421;10450;10465;10521;10569;10594;10643;10713;10907;10915;10921;10946;10992;11017;11051;11052;11157;11338;1153;1654;1655;1659;1660;1665;22826;22827;22916;22938;22985;23013;23020;23350;23398;23450;23451;23517;23524;23759;24144;24148;25804;25949;25962;26121;26986;27258;27336;27339;29105;3550;4116;4236;4343;4686;4809;51340;51362;51428;51503;51593;51639;51645;516…	264;904;424;238;225;793;341;301;177;731;586;2335;579;565;142;1098;305;501;895;155;227;551;80;475;172;662;614;1220;1270;795;253;559;156;536;1341;3664;2136;1029;646;1217;1304;1042;2752;527;837;941;139;243;1812;499;636;102;755;504;193;557;146;439;1003;790;128;848;579;622;229;876;125;166;103;641;432;1490;514;165;546;513;930;420;563;855;1593;285;908;95;758;843;248;221;164;494;272;344;238;288;977;437;2…	1	190	1	258	6	1921	2	573	500	85610	2942	142
ABD	524921	DGCR8 multiprotein complex	10236;10521;1655;1660;2521;3187;3192;3309;3609;4691;54487	636;731;614;1270;526;449;825;654;898;710;773	4	77	5	64	10	143	7	107	710	8086	391	11
AC	61958	Preproinsulin: Ribosome Nascent Complex	11224;2197;23521;25873;285596;3630;3921;4736;51121;6122;6123;6124;6125;6128;6129;6130;6132;6133;6134;6135;6136;6137;6138;6139;6141;6142;6143;6144;6146;6147;6152;6154;6155;6156;6157;6158;6159;6160;6161;6164;6165;6167;6168;6169;6170;6171;6173;6175;6176;6181;6187;6188;6189;6191;6192;6193;6194;6201;6202;6203;6204;6205;6206;6207;6208;6209;6210;6217;6218;6222;6223;6224;6227;6228;6229;6230;6231;6232;623…	123;133;203;105;310;110;295;217;145;403;407;427;297;288;248;266;257;192;214;178;165;211;204;184;188;176;196;160;128;156;157;145;136;115;148;169;159;128;135;117;110;97;92;70;51;25;142;317;114;115;293;243;264;263;263;204;249;194;208;194;165;158;132;151;151;145;130;146;135;152;145;119;83;143;289;125;115;84;156;69;67;200;128;215;140	2	148	1	92	2	191	6	525	156	15046	956	85
AC	526912	HSP90-FKBP38-CAM-Ca(2+) complex	23770;3320;3326;805	413;854;724;149	8.5	42	5.5	23	9.5	35	17	77	568.5	2140	177	4
AC	33970	80S:Met-tRNAi:mRNA:eIF5B:GTP	11224;2197;23521;25873;285596;3921;4736;51121;6122;6123;6124;6125;6128;6129;6130;6132;6133;6134;6135;6136;6137;6138;6139;6141;6142;6143;6144;6146;6147;6152;6154;6155;6156;6157;6158;6159;6160;6161;6164;6165;6167;6168;6169;6170;6171;6173;6175;6176;6181;6187;6188;6189;6191;6192;6193;6194;6201;6202;6203;6204;6205;6206;6207;6208;6209;6210;6217;6218;6222;6223;6224;6227;6228;6229;6230;6231;6232;6233;623…	123;133;203;105;310;295;217;145;403;407;427;297;288;248;266;257;192;214;178;165;211;204;184;188;176;196;160;128;156;157;145;136;115;148;169;159;128;135;117;110;97;92;70;51;25;142;317;114;115;293;243;264;263;263;204;249;194;208;194;165;158;132;151;151;145;130;146;135;152;145;119;83;143;289;125;115;84;156;69;67;128;215;140;1220	2	150	1	94	2	225	6	526	156.5	15956	995	84
AC	528398	WRN-Ku70-Ku80-PARP1 complex	142;2547;7486;7520	1014;609;1432;732	10	38	0.5	5	9.5	39	25.5	87	873	3787	169	4
AC	62172	Preprolactin Ribosome Nascent Complex	11224;2197;23521;25873;285596;3921;4736;51121;5617;6122;6123;6124;6125;6128;6129;6130;6132;6133;6134;6135;6136;6137;6138;6139;6141;6142;6143;6144;6146;6147;6152;6154;6155;6156;6157;6158;6159;6160;6161;6164;6165;6167;6168;6169;6170;6171;6173;6175;6176;6181;6187;6188;6189;6191;6192;6193;6194;6201;6202;6203;6204;6205;6206;6207;6208;6209;6210;6217;6218;6222;6223;6224;6227;6228;6229;6230;6231;6232;623…	123;133;203;105;310;295;217;145;227;403;407;427;297;288;248;266;257;192;214;178;165;211;204;184;188;176;196;160;128;156;157;145;136;115;148;169;159;128;135;117;110;97;92;70;51;25;142;317;114;115;293;243;264;263;263;204;249;194;208;194;165;158;132;151;151;145;130;146;135;152;145;119;83;143;289;125;115;84;156;69;67;128;215;140	2	148	1	92	2	195	6	525	156.5	14963	960	84
AC	526035	Vigilin-DNA-PK-Ku antigen complex	2547;3069;5591;7520	609;1268;4128;732	10.5	37	3.5	11	14.5	62	32	176	1000	6737	286	4
AC	58191	p-EGFR mutants:SHC1	11140;1956;3320;6464	378;1210;854;584	4	32	6.5	30	11	57	13.5	58	719	3026	177	4
AC	3673	Translated mRNA Complex with Premature Termination Codon Not Preceding Exon Junction	11224;1981;2107;2197;22916;23521;23708;25873;26986;285596;3921;4686;4736;51121;6122;6123;6124;6125;6128;6129;6130;6132;6133;6134;6135;6136;6137;6138;6139;6141;6142;6143;6144;6146;6147;6152;6154;6155;6156;6157;6158;6159;6160;6161;6164;6165;6167;6168;6169;6170;6171;6173;6175;6176;6181;6187;6188;6189;6191;6192;6193;6194;6201;6202;6203;6204;6205;6206;6207;6208;6209;6210;6217;6218;6222;6223;6224;6227;…	123;1599;437;133;156;203;628;105;636;310;295;790;217;145;403;407;427;297;288;248;266;257;192;214;178;165;211;204;184;188;176;196;160;128;156;157;145;136;115;148;169;159;128;135;117;110;97;92;70;51;25;142;317;114;115;293;243;264;263;263;204;249;194;208;194;165;158;132;151;151;145;130;146;135;152;145;119;83;143;289;125;115;84;156;69;67;128;215;140	2	165	1	100	2	238	6	564	158	18982	1067	89
AC	526846	Ku70/Ku86/Werner complex	2547;7486;7520	609;1432;732	9	27	0	4	10	30	31	67	732	2773	128	3
AC	525860	TRF2-Ku complex	2547;7014;7520	609;500;732	9	25	0	4	6	25	31	67	609	1841	121	3
AC	530443	60S ribosomal subunit; cytoplasmic	11224;23521;25873;285596;4736;6122;6124;6125;6128;6129;6130;6132;6133;6134;6135;6136;6137;6138;6139;6141;6142;6143;6144;6146;6147;6152;6154;6155;6156;6157;6158;6159;6160;6161;6164;6165;6167;6168;6169;6170;6171;6173;6175;6176;6181;7311;9045;9349	123;203;105;310;217;403;427;297;288;248;266;257;192;214;178;165;211;204;184;188;176;196;160;128;156;157;145;136;115;148;169;159;128;135;117;110;97;92;70;51;25;142;317;114;115;128;215;140	2	89	1	49	1.5	99	7	319	159.5	8521	556	48
AC	521592	Ku antigen-NARG1 complex	2547;7520;80155	609;732;866	9	25	2	6	6	24	31	76	732	2207	131	3
AC	3436	Translated mRNA Complex with Premature Termination Codon Preceding Exon Junction	10921;11224;1981;2107;2197;22794;22916;23521;23708;25873;26019;26986;285596;3921;4116;4686;4736;51121;6122;6123;6124;6125;6128;6129;6130;6132;6133;6134;6135;6136;6137;6138;6139;6141;6142;6143;6144;6146;6147;6152;6154;6155;6156;6157;6158;6159;6160;6161;6164;6165;6167;6168;6169;6170;6171;6173;6175;6176;6181;6187;6188;6189;6191;6192;6193;6194;6201;6202;6203;6204;6205;6206;6207;6208;6209;6210;6217;62…	305;123;1599;437;133;703;156;203;628;105;1272;636;310;295;146;790;217;145;403;407;427;297;288;248;266;257;192;214;178;165;211;204;184;188;176;196;160;128;156;157;145;136;115;148;169;159;128;135;117;110;97;92;70;51;25;142;317;114;115;293;243;264;263;263;204;249;194;208;194;165;158;132;151;151;145;130;146;135;152;145;119;83;143;289;125;115;84;156;69;67;476;128;215;140;411;174	1.5	170	1	111	2	274	5	582	162.5	22469	1137	96
AC	115356	Ku/Artemis/DNA-PKcs (dimer)/POLL	2547;27343;5591;64421;7520	609;575;4128;692;732	9	38	0	7	10	62	31	174	692	6736	281	5
AC	33626	43S complex	1964;1965;1968;2197;27335;3646;3921;6187;6188;6189;6191;6192;6193;6194;6201;6202;6203;6204;6205;6206;6207;6208;6209;6210;6217;6218;6222;6223;6224;6227;6228;6229;6230;6231;6232;6233;6234;6235;728689;8661;8662;8663;8664;8665;8666;8667;8668;8669;8894	144;315;472;133;218;445;295;293;243;264;263;263;204;249;194;208;194;165;158;132;151;151;145;130;146;135;152;145;119;83;143;289;125;115;84;156;69;67;914;1382;814;913;548;357;320;352;325;258;333	1	82	1	72	3	201	6	356	204	13773	711	49
AC	527343	IKBKB-CDC37-KIAA1967-HSP90AB1-HSP90AA1 complex	11140;3320;3326;3551;57805	378;854;724;756;923	5	45	3	23	14	64	12	92	756	3635	224	5
AC	530234	PCNA-KU antigen complex	2547;5111;7520	609;261;732	9	24	2	6	6	20	31	73	609	1602	123	3
AC	533116	HMGB1-HMGB2-HSC70-ERP60-GAPDH complex	2597;2923;3146;3148;3312	335;505;215;209;646	10	48	3	16	5	51	13	84	335	1910	199	5
AC	528542	PABPC1-HSPA8-HNRPD-EIF4G1 complex	1981;26986;3184;3312	1599;636;355;646	5	26	3.5	14	15.5	67	17.5	78	641	3236	185	4
AC	185509	PARP1;TOP1;HSP90B1;HSP90AA1;HSPA5;HSPA8;XRCC6; HSPA1A	142;2547;3309;3312;3320;7150;7184;3303	1014;609;654;646;854;765;803;641	11.5	92	4	37	9	92	26.5	210	709.5	5986	431	8
AC	5821	CCT/TriC(ADP):Sphingosine kinase 1	10574;10575;10576;10694;22948;6950;7203;8877;908	543;539;535;548;541;556;545;470;531	5	36	1	14	2	31	17	138	541	4808	219	9
AC	35288	eRF3-GTP:eRF1:80S Ribosome:mRNA:peptidyl-tRNA Complex	11224;2107;2197;23521;23708;25873;285596;3921;4736;51121;6122;6123;6124;6125;6128;6129;6130;6132;6133;6134;6135;6136;6137;6138;6139;6141;6142;6143;6144;6146;6147;6152;6154;6155;6156;6157;6158;6159;6160;6161;6164;6165;6167;6168;6169;6170;6171;6173;6175;6176;6181;6187;6188;6189;6191;6192;6193;6194;6201;6202;6203;6204;6205;6206;6207;6208;6209;6210;6217;6218;6222;6223;6224;6227;6228;6229;6230;6231;62…	123;437;133;203;628;105;310;295;217;145;403;407;427;297;288;248;266;257;192;214;178;165;211;204;184;188;176;196;160;128;156;157;145;136;115;148;169;159;128;135;117;110;97;92;70;51;25;142;317;114;115;293;243;264;263;263;204;249;194;208;194;165;158;132;151;151;145;130;146;135;152;145;119;83;143;289;125;115;84;156;69;67;128;215;140	2	154	1	92	2	193	6	530	157	15801	969	85
AC	3771	UPF1:eRF3 Complex on Translated mRNA	11224;1981;2107;2197;22916;23521;23708;25873;26986;285596;3921;4686;4736;51121;5976;6122;6123;6124;6125;6128;6129;6130;6132;6133;6134;6135;6136;6137;6138;6139;6141;6142;6143;6144;6146;6147;6152;6154;6155;6156;6157;6158;6159;6160;6161;6164;6165;6167;6168;6169;6170;6171;6173;6175;6176;6181;6187;6188;6189;6191;6192;6193;6194;6201;6202;6203;6204;6205;6206;6207;6208;6209;6210;6217;6218;6222;6223;6224;…	123;1599;437;133;156;203;628;105;636;310;295;790;217;145;1118;403;407;427;297;288;248;266;257;192;214;178;165;211;204;184;188;176;196;160;128;156;157;145;136;115;148;169;159;128;135;117;110;97;92;70;51;25;142;317;114;115;293;243;264;263;263;204;249;194;208;194;165;158;132;151;151;145;130;146;135;152;145;119;83;143;289;125;115;84;156;69;67;128;215;140	2	165	1	108	2	245	6	578	158.5	20100	1096	90
AC	131790	KU/TERT	2547;7015;7520	609;1132;732	9	21	1	5	6	24	31	64	732	2473	114	3
AC	121793	BARD1/DNA-PK/p53	2547;5591;580;7157;7520	609;4128;777;393;732	12	52	0	7	14	89	31	194	732	6639	342	5
AC	34214	60s ribosomal complex lacking L13a subunit	11224;25873;285596;4736;51121;6122;6123;6124;6125;6128;6129;6130;6132;6133;6134;6135;6136;6137;6138;6139;6141;6142;6143;6144;6146;6147;6152;6154;6155;6156;6157;6158;6159;6160;6161;6164;6165;6167;6168;6169;6170;6171;6173;6175;6176;6181;7311;9045;9349	123;105;310;217;145;403;407;427;297;288;248;266;257;192;214;178;165;211;204;184;188;176;196;160;128;156;157;145;136;115;148;169;159;128;135;117;110;97;92;70;51;25;142;317;114;115;128;215;140	2	90	1	49	2	100	6	314	159	8870	553	49
AC	34457	SRP:polypeptide+signal:ribosome	11224;2197;23521;25873;285596;3921;4736;51121;6122;6123;6124;6125;6128;6129;6130;6132;6133;6134;6135;6136;6137;6138;6139;6141;6142;6143;6144;6146;6147;6152;6154;6155;6156;6157;6158;6159;6160;6161;6164;6165;6167;6168;6169;6170;6171;6173;6175;6176;6181;6187;6188;6189;6191;6192;6193;6194;6201;6202;6203;6204;6205;6206;6207;6208;6209;6210;6217;6218;6222;6223;6224;6227;6228;6229;6230;6231;6232;6233;623…	123;133;203;105;310;295;217;145;403;407;427;297;288;248;266;257;192;214;178;165;211;204;184;188;176;196;160;128;156;157;145;136;115;148;169;159;128;135;117;110;97;92;70;51;25;142;317;114;115;293;243;264;263;263;204;249;194;208;194;165;158;132;151;151;145;130;146;135;152;145;119;83;143;289;125;115;84;156;69;67;86;136;144;504;627;671;128;215;140	1	152	1	95	2	211	6	566	156	16904	1024	89
AC	34966	80S:aminoacyl tRNA:mRNA:eEF1A:GTP	11224;1915;2197;23521;25873;285596;3921;4736;51121;6122;6123;6124;6125;6128;6129;6130;6132;6133;6134;6135;6136;6137;6138;6139;6141;6142;6143;6144;6146;6147;6152;6154;6155;6156;6157;6158;6159;6160;6161;6164;6165;6167;6168;6169;6170;6171;6173;6175;6176;6181;6187;6188;6189;6191;6192;6193;6194;6201;6202;6203;6204;6205;6206;6207;6208;6209;6210;6217;6218;6222;6223;6224;6227;6228;6229;6230;6231;6232;623…	123;462;133;203;105;310;295;217;145;403;407;427;297;288;248;266;257;192;214;178;165;211;204;184;188;176;196;160;128;156;157;145;136;115;148;169;159;128;135;117;110;97;92;70;51;25;142;317;114;115;293;243;264;263;263;204;249;194;208;194;165;158;132;151;151;145;130;146;135;152;145;119;83;143;289;125;115;84;156;69;67;128;1050;215;140	2	162	1	98	2	213	6	553	157	16248	1026	85
AC	62049	Preproinsulin-SRP Complex	11224;2197;23521;25873;285596;3630;3921;4736;51121;6122;6123;6124;6125;6128;6129;6130;6132;6133;6134;6135;6136;6137;6138;6139;6141;6142;6143;6144;6146;6147;6152;6154;6155;6156;6157;6158;6159;6160;6161;6164;6165;6167;6168;6169;6170;6171;6173;6175;6176;6181;6187;6188;6189;6191;6192;6193;6194;6201;6202;6203;6204;6205;6206;6207;6208;6209;6210;6217;6218;6222;6223;6224;6227;6228;6229;6230;6231;6232;623…	123;133;203;105;310;110;295;217;145;403;407;427;297;288;248;266;257;192;214;178;165;211;204;184;188;176;196;160;128;156;157;145;136;115;148;169;159;128;135;117;110;97;92;70;51;25;142;317;114;115;293;243;264;263;263;204;249;194;208;194;165;158;132;151;151;145;130;146;135;152;145;119;83;143;289;125;115;84;156;69;67;86;136;144;504;627;671;200;128;215;140	1	152	1	95	2	211	6	566	156	17214	1024	91
AC	118971	Ku/Artemis/DNA-PKcs (dimer)/DNTT	1791;2547;5591;64421;7520	509;609;4128;692;732	9	38	1	8	10	59	31	175	692	6670	280	5
AC	794581	TRF2.RAP1	10111;2547;26277;3308;4361;54386;7014;7520	1312;609;451;840;708;399;500;732	3.5	33	0.5	12	6.5	71	10.5	123	658.5	5551	239	8
AC	11701	DNA-PK synaptic complex	2547;5591;7520	609;4128;732	12	37	3	7	14	47	33	174	732	5469	265	3
AC	58069	EGF:Ligand-responsive EGFR mutants sensitive to non-covalent TKIs:HSP90:CDC37	11140;1950;1956;3320	378;1207;1210;854	4	32	5.5	28	9	51	13.5	57	1030.5	3649	168	4
AC	168084	TERT(+1)/hTR RNA/KU/TRF1	2547;7013;7015;7520	609;439;1132;732	4.5	21	0.5	5	7.5	33	16.5	66	670.5	2912	125	4
AC	525822	H2AX complex; isolated from cells without IR exposure	8350;11198;8350;26986;3014;3309;4869;51386;6741;6749;811;805;8294	136;1047;136;636;143;654;294;564;408;709;417;149;103	6	96	2	44	7	111	10	145	408	5396	396	13
AC	121786	BARD1/DNA-PK	2547;5591;580;7520	609;4128;777;732	10.5	39	1.5	7	13.5	60	32	176	754.5	6246	282	4
AC	5859	CCT/TriC:substrate complex	10564;10574;10575;10576;10694;22948;6950;7203;908	1785;543;539;535;548;541;556;545;531	5	39	1	14	5	56	17	138	543	6123	247	9
AC	528380	Ku antigen-YY1-alphaMyHC promoter complex	2547;7520;7528	609;732;414	9	22	2	6	7	27	31	68	609	1755	123	3
AC	5705	CCT/TriC(ADP)	10574;10575;10576;10694;22948;6950;7203;908	543;539;535;548;541;556;545;531	5	36	1.5	14	3.5	29	17.5	138	542	4338	217	8
AC	531523	NCOA6-DNA-PK-Ku-PARP1 complex	142;23054;2547;5591;7520	1014;2063;609;4128;732	11	48	1	8	9	59	31	194	1014	8546	309	5
AC	58286	Ligand-responsive Ub-p-6Y-EGFR mutants:p-Y371-CBL	11140;1956;3320;6233;7311;7314;7316;867	378;1210;854;156;128;229;685;906	3	49	1	41	4	76	9	93	531.5	4546	259	8
AC	521794	Rap1 complex	10111;142;2547;4361;54386;7014;7520	1312;1014;609;708;399;500;732	4	40	1	7	7	66	14	113	708	5274	226	7
AC	528922	CDC37-HSP90AA1-HSP90AB1-MAP3K11 complex	11140;3320;3326;4296	378;854;724;847	9	42	5	20	15	67	20	79	785.5	2803	208	4
AC	531531	40S ribosomal subunit; cytoplasmic	3921;6187;6188;6189;6191;6193;6194;6201;6202;6203;6204;6205;6206;6207;6208;6209;6210;6217;6218;6222;6223;6224;6227;6228;6229;6230;6231;6233;6234;6235	295;293;243;264;263;204;249;194;208;194;165;158;132;151;151;145;130;146;135;152;145;119;83;143;289;125;115;156;69;67	2	53	1	41	2	85	6	194	151.5	5183	373	30
AC	50431	viral DNA:Ku proteins:XRCC4:DNA ligase IV complex	2547;3981;7518;7520	609;911;336;732	4.5	21	0.5	5	8	32	17.5	68	670.5	2588	126	4
AC	62263	Preprolactin-SRP Complex	11224;2197;23521;25873;285596;3921;4736;51121;5617;6122;6123;6124;6125;6128;6129;6130;6132;6133;6134;6135;6136;6137;6138;6139;6141;6142;6143;6144;6146;6147;6152;6154;6155;6156;6157;6158;6159;6160;6161;6164;6165;6167;6168;6169;6170;6171;6173;6175;6176;6181;6187;6188;6189;6191;6192;6193;6194;6201;6202;6203;6204;6205;6206;6207;6208;6209;6210;6217;6218;6222;6223;6224;6227;6228;6229;6230;6231;6232;623…	123;133;203;105;310;295;217;145;227;403;407;427;297;288;248;266;257;192;214;178;165;211;204;184;188;176;196;160;128;156;157;145;136;115;148;169;159;128;135;117;110;97;92;70;51;25;142;317;114;115;293;243;264;263;263;204;249;194;208;194;165;158;132;151;151;145;130;146;135;152;145;119;83;143;289;125;115;84;156;69;67;86;136;144;504;627;671;128;215;140	1	152	1	95	2	215	6	566	156.5	17131	1028	90
AC	13736	DNA-PK:XRCC4:DNA ligase IV:DNA complex associated with ligatable DNA ends	2547;3981;5591;7518;7520	609;911;4128;336;732	9	37	1	8	10	59	31	178	732	6716	282	5
AC	128562	Ku/Artemis/DNA-PKcs (dimer)/Pol Mu	2547;27434;5591;64421;7520	609;494;4128;692;732	9	38	0	7	10	59	31	174	692	6655	278	5
AC	530594	Ribosome; cytoplasmic	11224;140032;23521;25873;285596;3921;4736;6122;6124;6125;6128;6129;6130;6132;6133;6134;6135;6136;6137;6138;6139;6141;6142;6143;6144;6146;6147;6152;6154;6155;6156;6157;6158;6159;6160;6161;6164;6165;6167;6168;6169;6170;6171;6173;6175;6176;6181;6187;6188;6189;6191;6192;6193;6194;6201;6202;6203;6204;6205;6206;6207;6208;6209;6210;6217;6218;6222;6223;6224;6227;6228;6229;6230;6231;6232;6233;6234;6235;73…	123;263;203;105;310;295;217;403;427;297;288;248;266;257;192;214;178;165;211;204;184;188;176;196;160;128;156;157;145;136;115;148;169;159;128;135;117;110;97;92;70;51;25;142;317;114;115;293;243;264;263;263;204;249;194;208;194;165;158;132;151;151;145;130;146;135;152;145;119;83;143;289;125;115;84;156;69;67;128;215;140	2	145	1	93	2	189	6	521	157	14314	948	81
AC	33452	60S ribosomal complex	11224;23521;25873;285596;4736;51121;6122;6123;6124;6125;6128;6129;6130;6132;6133;6134;6135;6136;6137;6138;6139;6141;6142;6143;6144;6146;6147;6152;6154;6155;6156;6157;6158;6159;6160;6161;6164;6165;6167;6168;6169;6170;6171;6173;6175;6176;6181;7311;9045;9349	123;203;105;310;217;145;403;407;427;297;288;248;266;257;192;214;178;165;211;204;184;188;176;196;160;128;156;157;145;136;115;148;169;159;128;135;117;110;97;92;70;51;25;142;317;114;115;128;215;140	2	92	1	49	1.5	101	6.5	325	159.5	9073	567	50
AC	33325	80S ribosome	11224;2197;23521;25873;285596;3921;4736;51121;6122;6123;6124;6125;6128;6129;6130;6132;6133;6134;6135;6136;6137;6138;6139;6141;6142;6143;6144;6146;6147;6152;6154;6155;6156;6157;6158;6159;6160;6161;6164;6165;6167;6168;6169;6170;6171;6173;6175;6176;6181;6187;6188;6189;6191;6192;6193;6194;6201;6202;6203;6204;6205;6206;6207;6208;6209;6210;6217;6218;6222;6223;6224;6227;6228;6229;6230;6231;6232;6233;623…	123;133;203;105;310;295;217;145;403;407;427;297;288;248;266;257;192;214;178;165;211;204;184;188;176;196;160;128;156;157;145;136;115;148;169;159;128;135;117;110;97;92;70;51;25;142;317;114;115;293;243;264;263;263;204;249;194;208;194;165;158;132;151;151;145;130;146;135;152;145;119;83;143;289;125;115;84;156;69;67;128;215;140	2	148	1	92	2	191	6	525	156	14736	956	83
AC	5782	CCT/TriC (ADP) associated actin	10574;10575;10576;10694;22948;60;6950;7203;908	543;539;535;548;541;375;556;545;531	5	41	2	25	5	40	17	148	541	4713	254	9
AC	524567	TNF-alpha/NF-kappa B signaling complex 6	11140;1147;2091;3320;3326;3551;6124;6128;6132;6156;6205;6207;8517;9020	378;745;321;854;724;756;427;288;257;115;158;151;487;947	1.5	59	2	39	3	83	8	165	402.5	6608	346	14
AC	5751	CCT/TriC(ATP):unfolded tubulin complex	10381;10574;10575;10576;10694;22948;4157;6950;7203;908	450;543;539;535;548;541;317;556;545;531	4	38	1.5	20	4	41	16	145	540	5105	244	10
AC	530308	DNA-PK-Ku-eIF2-NF90-NF45 complex	1965;1968;2547;3608;3609;5591;7520;8894	315;472;609;390;898;4128;732;333	3	44	2.5	28	7.5	92	11	221	540.5	7877	385	8
AC	34566	SRP receptor:SRP:ribosome:polypeptide+signal	11224;2197;23521;25873;285596;3921;4736;51121;58477;6122;6123;6124;6125;6128;6129;6130;6132;6133;6134;6135;6136;6137;6138;6139;6141;6142;6143;6144;6146;6147;6152;6154;6155;6156;6157;6158;6159;6160;6161;6164;6165;6167;6168;6169;6170;6171;6173;6175;6176;6181;6187;6188;6189;6191;6192;6193;6194;6201;6202;6203;6204;6205;6206;6207;6208;6209;6210;6217;6218;6222;6223;6224;6227;6228;6229;6230;6231;6232;62…	123;133;203;105;310;295;217;145;271;403;407;427;297;288;248;266;257;192;214;178;165;211;204;184;188;176;196;160;128;156;157;145;136;115;148;169;159;128;135;117;110;97;92;70;51;25;142;317;114;115;293;243;264;263;263;204;249;194;208;194;165;158;132;151;151;145;130;146;135;152;145;119;83;143;289;125;115;84;156;69;67;86;136;144;504;627;671;638;128;215;140	1	155	1	96	2	219	6	572	157	17813	1042	91
AC	118964	Ku/Artemis/DNA-PKcs (dimer)	2547;5591;64421;7520	609;4128;692;732	10.5	38	1.5	7	12	57	32	174	712	6161	276	4
ACD	3551	SMG1:UPF1:EJC:Translated mRNP	10921;11224;1981;2107;2197;22794;22916;23049;23521;23708;25873;26019;26986;285596;3921;4116;4686;4736;51121;55181;56006;5976;6122;6123;6124;6125;6128;6129;6130;6132;6133;6134;6135;6136;6137;6138;6139;6141;6142;6143;6144;6146;6147;6152;6154;6155;6156;6157;6158;6159;6160;6161;6164;6165;6167;6168;6169;6170;6171;6173;6175;6176;6181;6187;6188;6189;6191;6192;6193;6194;6201;6202;6203;6204;6205;6206;6207…	305;123;1599;437;133;703;156;3661;203;628;105;1272;636;310;295;146;790;217;145;991;520;1118;403;407;427;297;288;248;266;257;192;214;178;165;211;204;184;188;176;196;160;128;156;157;145;136;115;148;169;159;128;135;117;110;97;92;70;51;25;142;317;114;115;293;243;264;263;263;204;249;194;208;194;165;158;132;151;151;145;130;146;135;152;145;119;83;143;289;125;115;84;156;69;67;483;128;215;140;411;174	1.5	174	1	128	2	311	5	601	167	28766	1214	100
ACD	524242	HCF-1 complex	11091;23309;25942;3054;3065;3066;3308;3309;3312;3320;3326;5928;5931;64426;6667;8473;8819;9070;9739	334;1162;1273;2035;482;582;840;654;646;854;724;425;425;328;785;1046;220;628;1707	2	100	2	55	7	191	6	210	654	15150	556	19
ACD	795511	SNF2h/cohesin	10274;10735;1107;1108;11177;3065;3066;53615;5885;5928;5931;8243;8467;8932;9112;9126;9219	1258;1268;2059;1912;1556;482;582;291;631;425;425;1233;1052;411;715;1217;668	2	52	1	33	12	214	7	135	715	16185	434	17
ACD	522552	Kinase maturation complex 1	10971;11140;2011;3308;3320;3326;4215;5202;5607;7529;7531;7532;7533;7534;81572;84231	245;378;788;840;854;724;657;154;448;246;255;247;246;245;133;670	3.5	71	1	43	7.5	167	8.5	183	316.5	7130	464	16
ACD	794636	HCF-1N	11091;25942;3054;3065;3066;3308;3309;3312;3320;5928;5931;64426;6667;8473;9070;9739	334;1273;2035;482;582;840;654;646;854;425;425;328;785;1046;628;1707	2.5	86	1.5	43	8	170	6.5	170	650	13044	469	16
ACD	530269	TLE1 corepressor complex (MASH1 promoter-corepressor complex)	10111;142;3308;4691;4841;4869;7088;7155	1312;1014;840;710;471;294;770;1621	5.5	64	2	22	10	142	15	144	805	7032	372	8
ACD	34277	phospho-L13a associated wth the 3; UTR GAIT element of ceruloplasmin mRNA within the translation initiation complex	1964;1965;1968;1973;1974;1975;1977;1981;2197;23521;26986;27335;3646;3921;6187;6188;6189;6191;6192;6193;6194;6201;6202;6203;6204;6205;6206;6207;6208;6209;6210;6217;6218;6222;6223;6224;6227;6228;6229;6230;6231;6232;6233;6234;6235;728689;7458;8661;8662;8663;8664;8665;8666;8667;8668;8669;8894	144;315;472;406;407;611;248;1599;133;203;636;218;445;295;293;243;264;263;263;204;249;194;208;194;165;158;132;151;151;145;130;146;135;152;145;119;83;143;289;125;115;84;156;69;67;914;248;1382;814;913;548;357;320;352;325;258;333	1	103	1	104	3	291	6	425	243	18131	923	57
ACD	33736	43S:mRNA:eIF4F:eIF4B:eIF4H	1964;1965;1968;1973;1974;1975;1977;1981;2197;27335;3646;3921;6187;6188;6189;6191;6192;6193;6194;6201;6202;6203;6204;6205;6206;6207;6208;6209;6210;6217;6218;6222;6223;6224;6227;6228;6229;6230;6231;6232;6233;6234;6235;728689;7458;8661;8662;8663;8664;8665;8666;8667;8668;8669;8894	144;315;472;406;407;611;248;1599;133;218;445;295;293;243;264;263;263;204;249;194;208;194;165;158;132;151;151;145;130;146;135;152;145;119;83;143;289;125;115;84;156;69;67;914;248;1382;814;913;548;357;320;352;325;258;333	1	96	1	98	3	284	6	387	243	17292	865	55
ACD	524766	WINAC complex	10036;11198;6595;6597;6598;6599;6601;6602;6605;7155;7421;8289;86;9031	956;1047;1590;1679;385;1105;1214;515;411;1621;427;2285;429;1483	2	40	1.5	28	17	242	5.5	119	1076	15147	429	14
ACD	34803	cleaved polypeptide:Translocon	10952;11224;1650;2197;23471;23480;23521;25873;285596;29927;3921;4736;51121;6122;6123;6124;6125;6128;6129;6130;6132;6133;6134;6135;6136;6137;6138;6139;6141;6142;6143;6144;6146;6147;6152;6154;6155;6156;6157;6158;6159;6160;6161;6164;6165;6167;6168;6169;6170;6171;6173;6175;6176;6181;6184;6185;6187;6188;6189;6191;6192;6193;6194;6201;6202;6203;6204;6205;6206;6207;6208;6209;6210;6217;6218;6222;6223;6224…	96;123;456;133;374;68;203;105;310;476;295;217;145;403;407;427;297;288;248;266;257;192;214;178;165;211;204;184;188;176;196;160;128;156;157;145;136;115;148;169;159;128;135;117;110;97;92;70;51;25;142;317;114;115;607;631;293;243;264;263;263;204;249;194;208;194;165;158;132;151;151;145;130;146;135;152;145;119;83;143;289;125;115;84;156;69;67;286;183;185;173;128;215;140	1	152	1	94	1.5	216	6	575	159.5	18271	1037	94
ACD	35794	AUF1 Complexed with Translation and Heat Shock Proteins	1981;26986;3184;3312;3315;3303	1599;636;355;646;205;641	5	36	3	20	10.5	88	17.5	111	638.5	4082	255	6
ACD	533124	SNF2h-cohesin-NuRD complex	10274;10735;1107;11177;3065;3066;53615;5885;5928;5931;8243;8467;8932;9112;9126;9219	1258;1268;2059;1556;482;582;291;631;425;425;1233;1052;411;715;1217;668	2	43	1	30	11.5	173	6.5	122	691.5	14273	368	16
ACD	169836	Lamin A/C/Lamin B1/Lamin B2	4000;4001;84823	664;586;600	7	23	1	4	28	110	21	68	600	1850	205	3
ACD	527287	53BP1-containing complex	2547;6117;6118;7158;7520	609;616;270;1977;732	4	26	2	12	13	194	18	87	616	4204	319	5
ACD	65622	Phosphorylated UPF1:SMG5:SMG7:SMG6:PP2A:Translated mRNP	10921;11224;1981;2107;2197;22794;22916;23293;23381;23521;23708;25873;26019;26986;285596;3921;4116;4686;4736;51121;5515;5518;5520;5976;6122;6123;6124;6125;6128;6129;6130;6132;6133;6134;6135;6136;6137;6138;6139;6141;6142;6143;6144;6146;6147;6152;6154;6155;6156;6157;6158;6159;6160;6161;6164;6165;6167;6168;6169;6170;6171;6173;6175;6176;6181;6187;6188;6189;6191;6192;6193;6194;6201;6202;6203;6204;6205;…	305;123;1599;437;133;703;156;1419;1016;203;628;105;1272;636;310;295;146;790;217;145;309;589;447;1118;403;407;427;297;288;248;266;257;192;214;178;165;211;204;184;188;176;196;160;128;156;157;145;136;115;148;169;159;128;135;117;110;97;92;70;51;25;142;317;114;115;293;243;264;263;263;204;249;194;208;194;165;158;132;151;151;145;130;146;135;152;145;119;83;143;289;125;115;84;156;69;67;483;128;215;140;411…	2	179	1	129	2	300	6	643	174	28511	1251	103
ACD	527625	DHX9-ADAR-vigilin-DNA-PK-Ku antigen complex	103;1660;2547;3069;5591;7520	1226;1270;609;1268;4128;732	6	40	3.5	19	12.5	81	19	187	1247	9233	327	6
ACD	33813	43S: Ceruloplasmin mRNA:eIF4F:eIF4B:eIF4H:PABP	1964;1965;1968;1973;1974;1975;1977;1981;2197;26986;27335;3646;3921;6187;6188;6189;6191;6192;6193;6194;6201;6202;6203;6204;6205;6206;6207;6208;6209;6210;6217;6218;6222;6223;6224;6227;6228;6229;6230;6231;6232;6233;6234;6235;728689;7458;8661;8662;8663;8664;8665;8666;8667;8668;8669;8894	144;315;472;406;407;611;248;1599;133;636;218;445;295;293;243;264;263;263;204;249;194;208;194;165;158;132;151;151;145;130;146;135;152;145;119;83;143;289;125;115;84;156;69;67;914;248;1382;814;913;548;357;320;352;325;258;333	1	101	1	104	3	290	6	414	245.5	17928	909	56
ACD	531694	MGC1-DNA-PKcs-Ku complex	2547;5591;7520;9656	609;4128;732;2089	10.5	41	1.5	7	20.5	160	32	176	1410.5	7558	384	4
ACD	526441	TLE1 corepressor complex (MASH1 promoter-corepressor complex)	10111;142;3308;4628;4691;4841;4869;60;7088;7155	1312;1014;840;1976;710;471;294;375;770;1621	6	77	3	37	11	169	14	163	805	9383	446	10
AD	522936	Emerin complex 24	140836;2010;3008;3192;4000;4001;4171;4173;4175;5925;5934;708;79595;9111;8350	90;254;219;825;664;586;904;863;821;928;1139;282;1048;307;136	3	73	1	45	15	280	6	147	664	9066	545	15
AD	127391	MRN complex/ATM/MDC1/H2AX	10111;3014;4361;4683;472;9656	1312;143;708;754;3056;2089	3.5	23	1.5	8	19	184	4.5	34	1033	8062	249	6
AD	168352	RELA/p50/ATF-2/IRF/c-JUN/HMG1/PCAF/CBP/hSWI/SNF	1386;1387;3146;3664;3725;5970;60;6597;6598;6599;6601;6602;6605;8289;8850	505;2442;215;467;331;551;375;1679;385;1105;1214;515;411;2285;832	3	67	1	33	11	177	3	75	515	13312	352	15
AD	533363	Er-alpha-p53-hdm2 complex	2099;4193;7157	595;497;393	8	21	3	6	29	88	7	26	497	1485	141	3
AD	528839	POLR2A-CCNT1-CDK9-NCL-LEM6-CPSF2 complex	1025;10891;4691;53981;5430;904	372;798;710;782;1970;726	2.5	37	1.5	18	8.5	105	7.5	65	754	5358	225	6
AD	529841	HES1 promoter-Notch enhancer complex	1022;1024;1025;11198;2033;3516;4851;51763;5430;5469;6830;904;9794	346;464;372;1047;2414;500;2555;448;1970;1581;1726;726;1016	2	104	0	30	8	194	1	78	1016	15165	406	13
AD	184238	RXR/PPAR-gamma/PGC1-alpha/SRC1/CBP/p300	10891;1387;2033;5468;6256;8648	798;2442;2414;505;462;1441	4.5	99	0.5	14	13.5	78	0	2	1119.5	8062	193	6
AD	532726	SIN3-ING1b complex II	10284;25942;3065;3066;3621;51742;5928;5931;6597;6598;6599;6601;6602;8289;86;8819	172;1273;482;582;422;1312;425;425;1679;385;1105;1214;515;2285;429;220	1.5	37	1	17	5.5	168	4	78	498.5	12925	300	16
AD	526965	Multisubunit ACTR coactivator complex	1387;2033;8202;8850	2442;2414;1424;832	13	102	3	15	21	71	0.5	2	1919	7112	190	4
AD	526637	Anti-HDAC2 complex	10362;1107;1108;23028;23186;23199;23309;25942;2969;3065;3066;51317;5928;5931;7750;9112;9203;9219	317;2059;1912;876;482;1217;1162;1273;998;482;582;680;425;425;1377;715;1370;668	2	46	1	37	10.5	218	3.5	82	795.5	17020	383	18
AD	167348	IFN-beta nucleosome	1386;1387;2908;2957;2959;2960;2962;2971;3146;3663;3725;5430;5970;60;6597;6598;6599;6601;6602;6605;8289;8850	505;2442;778;376;316;439;517;365;215;514;331;1970;551;375;1679;385;1105;1214;515;411;2285;832	2	79	1	52	10.5	287	2.5	119	514.5	18120	537	22
AD	63524	Telomere Attachment Plate	10274;10388;10734;10735;23224;23345;23353;25777;25913;26277;27127;3018;4000;4001;474382;50511;54386;5885;65057;7013;7014;8243;8350;9126;9985;3014;8294	1258;1530;1225;1268;6907;8797;785;717;634;451;1235;126;664;586;115;236;399;631;544;439;500;1233;136;1217;547;143;103	1	76	2	47	7	287	2	157	631	32426	567	27
AD	795053	GST-Smad3	1387;51592;55914;57492;6597;6599;6601;8202;9611;9612	2442;1127;1302;2231;1679;1105;1214;1424;2440;2524	3.5	49	2	38	24	279	1.5	39	1551.5	17488	405	10
AD	529857	HES1 promoter corepressor complex	1022;1387;2033;3516;5430;6830	346;2442;2414;500;1970;1726	2.5	96	3	26	21	120	2.5	50	1848	9398	292	6
AD	529214	LARC complex (LCR-associated remodeling complex)	1108;3065;3066;3183;53615;57459;5928;5977;60;6597;6598;6599;6601;6603;6605;8289;86;8932;9219	1912;482;582;306;291;593;425;391;375;1679;385;1105;1214;531;411;2285;429;411;668	2	52	1	41	9	231	7	129	482	14475	453	19
AD	795066	GST-Smad2	1387;51592;55914;57492;6597;6599;6601;8202	2442;1127;1302;2231;1679;1105;1214;1424	3.5	39	2	29	20.5	156	2	38	1363	12524	262	8
AD	167303	CBP/p300/ACTR/RXR/CARM1/RAR/retinoids	10498;1387;2033;5914;6256;8202	608;2442;2414;462;462;1424	2	94	1	15	13.5	86	0.5	4	1016	7812	199	6
AD	116228	NSUN2/NPM1/Nucleolin	4691;4869;54888	710;294;767	13	35	3	8	24	70	14	43	710	1771	156	3
AD	530285	MASH1 promoter-coactivator complex	1387;142;3280;4841;5430;8350;6714;8850;8350;8294	2442;1014;280;471;1970;136;536;832;136;103	7.5	68	2	34	8.5	120	5	87	503.5	7920	309	10
AD	532641	p300-CBP-p270-SWI/SNF complex	1387;2033;6597;6598;6599;6601;8289	2442;2414;1679;385;1105;1214;2285	4	104	2	21	21	134	3	39	1679	11524	298	7
AD	521562	p300-MDM2-p53 protein complex	2033;4193;7157	2414;497;393	13	85	3	11	29	90	7	26	497	3304	212	3
AD	531153	RSmad complex	1387;4087;4088;4089;51592;57492;6597;6599;6601;8202	2442;467;425;552;1127;2231;1679;1105;1214;1424	4	51	1	14	13.5	156	1.5	39	1170.5	12666	260	10
AD	794236	HDAC2	10362;1107;1108;23028;23186;23199;25942;3065;3066;51317;5928;5931;7750;9112;9203;9219;9569	317;2059;1912;876;482;1217;1273;482;582;680;425;425;1377;715;1370;668;959	2	46	1	27	10	186	3	72	715	15819	331	17
AD	523923	Emerin architectural complex	2010;4000;4001;60;6709;9111	254;664;586;375;2477;307	6	33	5	39	28	157	6.5	64	480.5	4663	293	6
B	126338	PDGF-CC/PDGFRA/PDGFRB	1436;5156;5159;56034	972;1089;1106;345	0	0	12.5	41	1	7	0.5	5	1030.5	3512	53	4
B	168401	FAK/p130CAS/SRC/CSK/paxillin/actin	1445;5747;58;5829;6714;9564	450;1074;377;591;536;870	0	6	9	65	8.5	87	0.5	12	563.5	3898	170	6
B	4552	GRB2:GAB1:PIK3R1	2549;2885;5295	724;217;724	1	5	13	32	6	22	0	6	724	1665	65	3
B	4582	EGF:p-6Y-EGFR:GRB2:GAB1:PIK3	1950;1956;2549;2885;5290;5295	1207;1210;724;217;1068;724	0.5	8	9	50	3.5	56	0	23	896	5150	137	6
B	115158	GAB1/SHIP/PIK3R1/SHP2/SHC	2549;3635;5295;5781;6464	724;1189;724;593;584	1	4	9	45	6	38	1	4	724	3814	91	5
B	4613	EGF:p-6Y-EGFR:GRB2:GAB1	1950;1956;2549;2885	1207;1210;724;217	1.5	7	9.5	36	8	49	3	23	965.5	3358	115	4
B	533638	EGFR-containing signaling complex	1956;2064;5286;5287	1210;1255;1686;1634	0.5	4	8.5	34	9.5	53	11.5	47	1444.5	5785	138	4
B	122686	PDGF-BB/PDGFRB (dimer)/GRB2/DOCK4/Dynamin 2	1436;1785;2885;5155;5159;9732	972;870;217;241;1106;1966	0	5	4.5	37	3	24	3	19	921	5372	85	6
B	131728	FAK/Src-Yes-Fyn/Vinculin	5747;7414;7525	1074;1134;543	0	3	12	33	16	59	3	15	1074	2751	110	3
B	169326	TFFs/ErbB1/ERBB2	1956;2064;7031	1210;1255;84	0	3	12	28	13	46	7	24	1210	2549	101	3
B	117228	FGFR1-FGF complex/Src/Cortactin	2017;2246;2260;6714	550;155;822;536	1	14	10	40	8.5	44	0	11	543	2063	109	4
B	48287	GRB2:p-SHP2:p-KIT complex	2534;2885;3815;4254;5781	537;217;976;273;593	0	6	9	38	6	24	1	9	537	2596	77	5
B	204298	PDGFR-bb:PI3K	1436;5159;5290;5291;5293;5295;5296	972;1106;1068;1070;1044;724;728	0	1	9	60	2	20	1	14	1044	6712	95	7
B	30056	PDGF:Phospho-PDGF receptor dimer:PI3K	1436;5154;5159;5291;5295	972;211;1106;1070;724	0	1	9	45	1	13	1	10	972	4083	69	5
B	129392	B-cell antigen/BCR complex/Btk/LYN/SYK/BLNK/PLCgamma2/CD72	29760;4067;5336;6850;695;971;973;974	456;512;1265;635;659;359;226;230	0	0	7.5	66	1	29	1	12	484	4342	107	8
B	524287	CAS-SRC-FAK complex	5747;6714;9564	1074;536;870	0	0	16	43	11	47	0	1	870	2480	91	3
B	166509	TRIP6/p130 Cas/FAK1/Paxillin	5747;5829;7205;9564	1074;591;476;870	0	0	12	50	18	75	0	1	730.5	3011	126	4
B	533239	p130Cas-ER-alpha-cSrc-kinase- PI3-kinase p85-subunit complex	2099;5295;6714;9564	595;724;536;870	0.5	9	10	43	8.5	43	0.5	2	659.5	2725	97	4
B	130860	FAK/Src-Yes-Fyn/p130 CAS/NCK1-2	5747;6714;8440;9564	1074;536;380;870	0	0	11.5	47	8.5	50	0	1	703	2860	98	4
B	48603	NRGs/EGFLs:p-ERBB4cyt1:p-ERBB2:PI3K	2064;2066;2069;5290;5295	1255;1308;169;1068;724	0	3	12	48	2	22	0	9	1068	4524	82	5
B	132567	FAK/Src-Yes-Fyn/JIP3	23162;5747;7525	1336;1074;543	0	0	12	28	14	57	0	3	1074	2953	88	3
B	48313	P13K:p(Y)-GAB2:GRB2:p-SHP2:p-KIT complex	2885;3815;4254;5290;5296;5781;7525;9846	217;976;273;1068;728;593;543;676	0	6	9	62	5	57	0.5	12	634.5	5074	137	8
B	254532	EGFR forms a complex with PTK2B; SRC and STAT3	1956;2185;6714;6774	1210;1009;536;770	1.5	6	10	43	19	78	5.5	28	889.5	3525	155	4
B	39729	Netrin1:pUnc5C:DCC:Shp2	1630;2534;5747;5781;8633;9423	1447;537;1074;593;931;604	0	2	5.5	39	5	50	0	1	767.5	5186	92	6
B	127184	p130Cas/CRK/Src/PYK2	1398;2185;6714;9564	304;1009;536;870	0	0	10	46	9	51	0.5	3	703	2719	100	4
B	30041	Phospho-alpha-Phospho-beta receptor heterodimer	1436;5156;5159	972;1089;1106	0	0	16	41	1	7	1	5	1089	3167	53	3
B	124477	E-cadherin/Ca2+/beta catenin/IQGAP1/p120 catenin	1499;1500;999	781;968;882	2	5	10	38	22	88	12	27	882	2631	158	3
B	201434	IGF-1R_p:IRS-1_p:PI3K	3480;3667;5290;5291;5293;5295;5296	1367;1242;1068;1070;1044;724;728	0	4	9	57	4	84	0	10	1068	7243	155	7
B	130663	IL2/IL2R alpha/beta/gamma/JAK1/LCK/JAK3/IRS1-2/PI3K	3558;3559;3560;3561;3640;3667;3716;3718;3932;5290;5295	153;272;551;369;131;1242;1154;1124;509;1068;724	0	4	4	48	2	85	0	10	551	7297	147	11
B	48577	NRG1/2:p-ERBB3:p-ERBB2:PI3K	2064;2065;3084;5290;5295	1255;1342;645;1068;724	0	2	12	39	3	24	0	7	1068	5034	72	5
B	529717	FGFR2-c-Cbl-Lyn-Fyn complex	2263;2534;4067;867	822;537;512;906	0	1	10	41	10	37	0	4	679.5	2777	83	4
B	15309	Cadherin:Catenin complex	1003;1495;1500;3728	784;906;968;745	1	5	9.5	47	12	78	9.5	33	845	3403	163	4
B	31075	PDGF alpha/beta:PDGF AB and BB dimers	1436;5154;5156;5159	972;211;1089;1106	0	0	12.5	41	1	7	0.5	5	1030.5	3378	53	4
B	48619	EGF:p-EGFR:p-ERBB2:GRB2:GAB1	1950;1956;2064;2549;2885	1207;1210;1255;724;217	0	7	12	48	13	62	6	30	1207	4613	147	5
B	30073	PDGF:Phospho-PDGF receptor dimer:PLC-gamma	1436;5154;5159;5335	972;211;1106;1290	0	0	11.5	39	3	13	2.5	11	1039	3579	63	4
B	29128	Grb2:pFAK bound to NCAM1:pFyn	2534;2885;4684;5747;5786;64601;6708;6711	537;217;858;1074;802;839;2419;2364	0	16	5.5	52	3.5	95	1	21	848.5	9110	184	8
B	124344	EGFR/ErbB2/betacellulin	1956;2064;685	1210;1255;178	0	3	12	28	13	46	7	24	1210	2643	101	3
B	114910	EGFR/ErbB2/TGFA	1956;2064;7039	1210;1255;160	0	3	12	28	13	46	7	24	1210	2625	101	3
B	204193	PDGFR-bb:PLC gamma1	1436;5159;5335	972;1106;1290	0	0	14	39	5	13	4	11	1106	3368	63	3
B	122818	EGFR/PI3K-beta/Gab1	1956;2549;5291;5295	1210;724;1070;724	0.5	4	13.5	50	10.5	55	2.5	22	897	3728	131	4
B	115109	PDGF-BB/PDGFRA/PDGFRB	1436;5155;5156;5159	972;241;1089;1106	0	0	12.5	41	1	7	0.5	5	1030.5	3408	53	4
B	121194	N-cad-CTF1/beta catenin-gamma catenin/alpha catenin/p120 catenin	1000;1495;1500;3728	906;906;968;745	1	5	9.5	49	12	78	9.5	34	906	3525	166	4
B	36683	EGF:p-6Y-EGFR:p-6Y-ERBB2	1950;1956;2064	1207;1210;1255	0	3	12	29	13	46	7	24	1210	3672	102	3
B	54506	High affinity IL-5 receptor complex dimer; inactive JAK2; phosphorylated Bc:p(Y427;349;350)-SHC1:GRB2:p(Y)-GAB2:p85-containing Class 1A PI3Ks	1439;2885;3567;3568;3717;5293;5296;6464;9846	897;217;134;420;1132;1044;728;584;676	0	4	5	58	2	41	0	11	676	5832	114	9
B	47994	Activated FGFR bound to PI3K	10818;2261;2549;2885;5290;5296;5781;8817	508;806;724;217;1068;728;593;207	0	6	6	50	4	47	0	7	658.5	4851	110	8
B	795240	emerin C52	10971;1152;2010;27250;3068;3190;3191;3192;3609;51691;6632;7067;708;7531;8539;8826	245;381;254;469;256;464;589;825;898;96;119;490;282;255;524;1657	0.5	37	1.5	82	7	145	6	124	422.5	7804	388	16
B	125938	ErbB4/EGFR/neuregulin 1 beta	1956;2066;3084	1210;1308;645	2	6	16	39	2	36	2	19	1210	3163	100	3
B	4569	EGF:p-6Y-EGFR:GRB2:GAB1:PIK3R1	1950;1956;2549;2885;5295	1207;1210;724;217;724	1	8	13	49	6	55	0	23	724	4082	135	5
B	127331	Nephrin/NEPH1/ZO-1	4868;55243;58510;7082	1241;757;536;1748	0	0	9.5	45	2.5	73	0.5	9	999	4282	127	4
B	128773	alphav/beta3 Integrin/c-FMS/Cbl/Cas	1436;3685;3690;867;9564	972;1048;788;906;870	0	1	9	43	5	29	1	12	906	4584	85	5
B	526097	LAT-PLC-gamma-1-p85-GRB2-CBL-VAV-SLP-76 signaling complex; C305 activated	27040;2885;3937;5295;5335;7409;867	269;217;533;724;1290;845;906	1	9	10	66	6	42	0	20	724	4784	137	7
B	199477	Gab1_p:PI3-kinase	2549;5290;5291;5293;5295	724;1068;1070;1044;724	0	1	7	40	2	25	0	9	1044	4630	75	5
B	125135	PDGF-AB/PDGFRA/PDGFRB	1436;5154;5155;5156;5159	972;211;241;1089;1106	0	0	9	41	1	7	0	5	972	3619	53	5
B	530891	PLC-gamma-2-Lyn-FcR-gamma complex	2209;4067;5336	374;512;1265	0	0	13	31	1	11	3	7	512	2151	49	3
B	40684	EGF:p-EGFR:p-ERBB2:PLCG1	1950;1956;2064;5335	1207;1210;1255;1290	0	3	13	43	10	53	6.5	30	1232.5	4962	129	4
B	128675	LAT/GRAP2/SLP76/VAV1/PLCgamma1	27040;3937;5335;7409;9402	269;533;1290;845;330	0	4	7	40	4	25	0	14	533	3267	83	5
B	124033	Ephrin B1/EPHB1-2/Src Family Kinases	1947;2048;2534	346;987;537	0	0	10	31	10	26	0	2	537	1870	59	3
B	117809	IL3/IL3RA/CSF2RB (dodecamer)/JAK2/JAK2/SHP2/GRB2/GAB2	1439;2885;3562;3563;3717;5781;9846	897;217;152;378;1132;593;676	0	6	8	49	1	36	0	7	593	4045	98	7
B	54525	High affinity GM-CSF receptor complex dimer; inactive JAK2; phosphorylated Bc:p(Y427;349;350)-SHC1:GRB2:p(Y)-GAB2:p85-containing Class 1A PI3Ks	1437;1438;1439;2885;3717;5293;5296;6464;9846	144;434;897;217;1132;1044;728;584;676	0	4	5	57	2	41	0	11	676	5856	113	9
B	197555	BLNK:Vav:BTK:PLC gamma2:PIP3	2885;29760;5336;6850;7409	217;456;1265;635;845	0	7	10	52	1	6	3	18	635	3418	83	5
B	63913	Thin Filament With Troponin Bound Calcium	1756;4703;7111;7125;7135;7140;7168;7273	3685;6669;359;160;187;258;284;32767	1.5	20	0.5	70	2	62	0	6	321.5	44369	158	8
B	129187	EGFR/ErbB3/epiregulin	1956;2065;2069	1210;1342;169	0	3	12	28	3	36	0	17	1210	2721	84	3
B	125627	EGFR/ErbB3/EGF	1950;1956;2065	1207;1210;1342	0	3	12	29	3	36	0	17	1210	3759	85	3
B	125021	PDGF-BB/PDGFRB (dimer)/GAB1/N-WASP	142685;1436;2549;5155;5159;8976	588;972;724;241;1106;505	0	2	5.5	42	1.5	23	0	5	656	4136	72	6
B	128910	EGFR/ErbB2/epiregulin	1956;2064;2069	1210;1255;169	0	3	12	28	13	46	7	24	1210	2634	101	3
B	4631	EGF:p-6Y-EGFR:GRB2:p-5Y-GAB1:SHP2	1950;1956;2549;2885;5781	1207;1210;724;217;593	2	9	9	45	7	56	1	24	724	3951	134	5
B	132703	EGFR/ErbB2/HBEGF	1839;1956;2064	208;1210;1255	3	8	12	28	13	47	7	24	1210	2673	107	3
B	54536	IL2:IL2R trimer p(Y338) beta subunit:p-SHC:GRB2:GAB2:p85-containing Class 1A PI3Ks	2885;3558;3559;3560;3561;3640;3716;3718;5293;5295;6464;9846	217;153;272;551;369;131;1154;1124;1044;724;584;676	0	5	4.5	57	2	56	0.5	21	567.5	6999	139	12
B	527470	PLC-gamma-1-LAT-c-CBL complex; OKT3 stimulated	27040;5335;867	269;1290;906	0	1	10	31	11	31	0	6	906	2465	69	3
B	48770	ERBB4:ERBB3 heterodimer	10718;2065;2066	696;1342;1308	0	2	12	34	2	7	0	2	1308	3346	45	3
B	116923	PDGF-BB/PDGFRB (dimer)/GRB2/SOS1/SHP2	1436;2885;5155;5159;5781;6654	972;217;241;1106;593;1333	0	6	7	41	3	26	1	12	782.5	4462	85	6
B	48568	NRG1/2:p-ERBB3:p-ERBB2:PIK3R1	2064;2065;5295;9542	1255;1342;724;858	0	1	12	37	4.5	23	0	7	1056.5	4179	68	4
B	115859	B-cell antigen/BCR complex/Btk/LYN/SYK/BLNK/PLCgamma2	29760;4067;5336;6850;695;973;974	456;512;1265;635;659;226;230	0	0	10	66	1	29	1	12	512	3983	107	7
B	129308	FAK/Src-Yes-Fyn/p130 CAS	5747;7525;9564	1074;543;870	0	0	16	48	13	49	1	4	870	2487	101	3
B	48594	NRGs/EGFLs:p-ERBB4cyt1:p-ERBB2:PIK3R1	145957;2064;2066;5295	115;1255;1308;724	0.5	3	12.5	47	4	21	1	9	989.5	3402	80	4
B	48300	GAB2:GRB2:p-SHP2:p-KIT complex	2885;3815;4254;5781;6714;9846	217;976;273;593;536;676	0	6	8	47	6.5	50	0.5	9	564.5	3271	112	6
B	127377	IGF-1R heterotetramer/IGF1/IRS1/Shp2	3479;3480;3667;5781	153;1367;1242;593	1.5	5	9.5	32	13	77	0.5	2	917.5	3355	116	4
B	47984	phospho-IRS:PI3K	1796;5291;5295	481;1070;724	0	1	12	32	6	15	0	5	724	2275	53	3
B	118481	GAB2/PI3K/SHP2	5290;5295;5781;9846	1068;724;593;676	0.5	3	10.5	35	6.5	39	0	1	700	3061	78	4
B	123572	HGF(dimer)/MET(dimer)/GAB1/SHP2	2549;3082;4233;5781	724;728;1408;593	0	2	10	34	10.5	36	0.5	11	726	3453	83	4
B	197779	Phospholipase C gamma:PKC	27040;5335;5336	269;1290;1265	0	0	14	37	7	21	3	9	1265	2824	67	3
B	533462	PLC-gamma-2-Syk-LAT-FcR-gamma complex	2209;27040;5336;6850	374;269;1265;635	0	0	11.5	41	2.5	18	0.5	4	504.5	2543	63	4
B	168502	Paxillin/FAK/Talin/SPTAN1/Integrin-alpha/Integrin-beta/ECM/SRC/Ezrin	3672;3688;5747;5829;6709;6714;7094;7430	1179;801;1074;591;2477;536;2541;586	0	19	8	63	10	124	1.5	41	937.5	9785	247	8
B	171888	Paxillin/alpha-actinin/Talin/SPTAN1/Integrin-alpha/Integrin-beta/ECM/SRC/Ezrin	3672;3688;5829;6709;7094;7430;87	1179;801;591;2477;2541;586;914	3	24	8	44	7	87	3	44	914	9089	199	7
B	198979	EPOR:JAK2:STAT5	2057;3717;6776;6777	508;1132;794;787	1	4	10	40	3	13	0	1	790.5	3221	58	4
B	41735	Activated TrkA receptor:Phospho-IRS1/2:PI3K(p85:p110)	3667;4803;4914;5291;5295	1242;241;796;1070;724	0	3	7	39	1	59	0	5	796	4073	106	5
B	63339	FYN-like kinases:p(Y731)-CBL:GRB2:Ubiquitinated p85-containing Class 1A PI3Ks	2885;5293;5296;6850;867	217;1044;728;635;906	0	5	9	45	4	22	1	11	728	3530	83	5
B	118540	PDGF-BB/PDGFRB (dimer)/CBL	1436;5155;5159;867	972;241;1106;906	0	1	9.5	35	3	17	0.5	5	939	3225	58	4
B	36899	Activated FGFR:p-FRS2alpha:GRB2:GAB1:PI3K	10818;2254;2261;2549;2885;5290;5295	508;208;806;724;217;1068;724	0	5	5	45	4	42	0	6	724	4255	98	7
B	129575	FAK/Src-Yes-Fyn/RasGAP/p190RhoGAP	2534;2909;5747;5921	537;1499;1074;1047	0	1	7.5	35	17	64	0	2	1060.5	4157	102	4
B	130007	netrin 1/DCC/FAK/Fyn/p130 CAS	1630;2534;5747;9423;9564	1447;537;1074;604;870	0	0	10	49	6	49	0	1	870	4532	99	5
B	533414	LAT-PLC-gamma-1-p85-GRB2-SOS signaling complex; C305 activated	27040;2885;5295;5335;6654	269;217;724;1290;1333	0	5	7	41	7	39	0	12	724	3833	97	5
B	187333	CBL;GRB2;SOS1;SHC1;VAV2;CBLB;UBB;PIK3R2;SNRPD2;ACTA2;EGF;PIK3R1;ERRFI1;ATP5C1;MT-CO2;YWHAZ;SOS2	1950;2885;4513;509;5295;5296;54206;59;6464;6633;6654;6655;7314;7410;7534;867;868	1207;217;227;298;724;728;462;377;584;118;1333;1332;229;878;245;906;982	0	23	3	66	4	84	0	44	584	10847	217	17
B	202858	JAK:Cytokine receptor	1271;1438;1439;1441;2057;23765;2690;3454;3455;3459;3460;3554;3556;3559;3560;3561;3563;3566;3568;3570;3572;3575;3577;3579;3581;3587;3588;3594;3595;3597;3598;3601;3716;3717;3718;3953;3977;4352;5618;7297;7850;8809;9180	372;434;897;863;508;866;638;557;515;489;337;569;570;272;551;369;378;825;420;468;918;459;350;360;521;578;325;662;862;427;380;267;1154;1132;1124;1165;1097;635;622;1187;398;541;979	0	1	2	124	1	82	0	25	551	27041	232	43
B	525224	PLC-gamma-2-SLP-76-Lyn-Grb2 complex	2885;3937;4067;5336	217;533;512;1265	0	4	10	41	2.5	16	3.5	13	522.5	2527	74	4
B	128173	LYN/TEC/p62DOK	1796;4067;7006	481;512;631	0	0	12	28	8	19	1	5	512	1624	52	3
B	19419	Crk bound to p130Cas:FADK1	1398;2335;3674;3690;54518;5747;5908;6714;7094;9564	304;2477;1039;788;666;1074;184;536;2541;870	0	3	4	68	5.5	77	0.5	11	829	10479	159	10
B	29142	Grb2:Sos:pFAK bound to NCAM1:pFyn	2534;2885;4684;5747;57731;5786;64601;6654;6709	537;217;858;1074;2564;802;839;1333;2477	0	14	5	49	5	92	0	16	858	10701	171	9
B	121728	Src family/SYK family/BLNK-LAT/BTK-ITK/PLC-gamma	2534;29760;3702;5336;6850	537;456;620;1265;635	0	1	10	53	1	16	0	4	620	3513	74	5
B	127717	B-cell antigen/BCR complex/LYN/SYK	4067;6850;973;974	512;635;226;230	0	0	8.5	35	2.5	15	1	6	371	1603	56	4
B	167575	PYK2/SRC/P130cas/CRKL	1399;2185;6714;9564	303;1009;536;870	0	0	10	46	9.5	52	1	4	703	2718	102	4
B	114659	IL2/IL2R alpha/beta/gamma/JAK1/LCK/JAK3/SHC/GRB2/SOS1/GAB2/SHP2	2885;3558;3559;3560;3561;3640;3716;3718;3932;5781;6464;6654;9846	217;153;272;551;369;131;1154;1124;509;593;584;1333;676	0	7	4	53	4	78	0	18	551	7666	156	13
B	48760	ERBB4:EGFR heterodimer	1839;1950;1956;2066	208;1207;1210;1308	2.5	10	8.5	39	1.5	36	1	19	1208.5	3933	104	4
B	129616	IL4/IL4R/JAK1/IL2R gamma/JAK3/FES/IRS2	2242;3561;3565;3566;3640;3716;3718;8660	822;369;153;825;131;1154;1124;1338	0	0	4.5	39	3	85	1	13	823.5	5916	137	8
B	170493	Paxillin/FAK/Talin/Actin/Integrin-alpha/Integrin-beta/ECM	3672;3688;5747;58;5829;7094	1179;801;1074;377;591;2541	0	9	9	49	6	80	2.5	22	937.5	6563	160	6
B	169630	B-cell antigen/BCR/CD79A/CD79B/Btk/LYN/BLNK	29760;4067;613;695;973;974	456;512;1271;659;226;230	0	0	7.5	53	5.5	40	1	9	484	3354	102	6
B	123768	FAK/Src-Yes-Fyn/RasGAP	5747;5921;7525	1074;1047;543	0	0	12	32	13	43	0	3	1047	2664	78	3
B	122722	FAK/Src-Yes-Fyn/p130 CAS/CRK	1398;5747;6714;9564	304;1074;536;870	0	0	11.5	49	9	54	0	1	703	2784	104	4
B	188527	PIK3R1;PIK3R2;DOK1	1796;5295;5296	481;724;728	0	1	12	34	6	18	0	0	724	1933	53	3
B	200615	Gab1:PLC gamma	2549;5335;5336	724;1290;1265	0	0	14	44	7	23	3	9	1265	3279	76	3
B	48455	ERBB2:ERBB4cyt1 heterodimers	10718;2064;2066	696;1255;1308	0	2	12	34	2	17	2	9	1255	3259	62	3
B	30230	EGF:p-6Y-EGFR:PLCG1	1950;1956;5335	1207;1210;1290	0	3	14	31	7	40	6	23	1210	3707	97	3
B	48428	ERBB2:ERBB2IP:HSP90:CDC37	11140;2064;3320;55914	378;1255;854;1302	2.5	29	11	39	14.5	60	8.5	49	1054.5	3789	177	4
B	132205	GMCSF/GMR alpha/CSF2RB/JAK2 (dodecamer)/SHC/GRB2/GAB2/PI3K	1437;1438;1439;2885;3717;5290;5295;6464;9846	144;434;897;217;1132;1068;724;584;676	0	5	5	57	1	42	0	7	676	5876	111	9
B	527949	EGFR-CBL-GRB2 complex	1956;2885;867	1210;217;906	3	8	10	31	11	45	6	23	906	2333	107	3
B	128606	N-cadherin/Ca2+/beta catenin/alpha catenin/p120 catenin/Fer	1000;1495;1499;1500;2241	906;906;781;968;822	2	8	6	51	14	94	12	42	906	4383	195	5
B	48781	PIK3R1:p-ERBB4cyt1	2066;2069;5295	1308;169;724	1	3	13	35	2	8	0	2	724	2201	48	3
B	123350	PDGF-BB/PDGFRB (dimer)/PLCgamma1	1436;5155;5159;5335	972;241;1106;1290	0	0	11.5	39	3	13	2.5	11	1039	3609	63	4
B	532402	CIN85 complex (CIN85; CRK; BCAR1; CBL; PIK3R1; GRB2; SOS1)	1398;2885;30011;5295;6654;867;9564	304;217;665;724;1333;906;870	0	6	6	56	7	61	0	7	724	5019	130	7
B	123248	ErbB4/ErbB2/neuregulin 1 beta	2064;2066;3084	1255;1308;645	1	3	12	35	2	16	2	9	1255	3208	63	3
B	120321	EGFR/ErbB3/TGFA	1956;2065;7039	1210;1342;160	0	3	12	28	3	36	0	17	1210	2712	84	3
B	36886	Activated FGFR:p-FRS2alpha:p-SHP2:GRB2:GAB1:PI3KR1	10818;2261;2549;26281;2885;5295;5781	508;806;724;211;217;724;593	0	7	7	53	6	49	0	7	593	3783	116	7
B	116612	HGF(dimer)/MET(dimer)/GRB2/GAB1/SHP2	2549;2885;3082;4233;5781	724;217;728;1408;593	0	6	9	39	7	37	1	17	724	3670	99	5
B	126461	GRB2/SOS1/GAB family/SHP2/PI3K	2549;2885;5290;5295;5781;6654	724;217;1068;724;593;1333	0.5	7	7	44	6.5	42	0	7	724	4659	100	6
B	133498	PDGF-DD/PDGFRA/PDGFRB	1436;5156;5159;80310	972;1089;1106;370	0	0	12.5	42	1	7	1	6	1030.5	3537	55	4
B	202448	JAK2:IL-5R:JAK1:STAT5	1439;3568;3716;3717;6776;6777	897;420;1154;1132;794;787	0	4	6.5	44	3.5	21	0	6	845.5	5184	75	6
B	130956	NTAL/PLCgamma1/GRB2/SLP76/GADs	2885;3937;5335;7462	217;533;1290;243	0	4	8.5	36	5	18	4	14	388	2283	72	4
B	197651	PI3K:CD19	5290;5291;5293;5295;5296;930	1068;1070;1044;724;728;556	0	1	7	42	3	18	0	9	886	5190	70	6
B	530052	SLP-76-PLC-gamma-1-VAV complex; alpha-TCR stimulated	3937;5335;7409	533;1290;845	0	3	10	31	4	11	6	14	845	2668	59	3
B	54517	IL3:IL3R active complex; phosphorylated Bc:p(Y427;349;350)-SHC1:GRB2:p(Y)-GAB2:p85-containing Class 1A PI3Ks	1439;2885;3562;3563;3717;5293;5296;6464;9846	897;217;152;378;1132;1044;728;584;676	0	4	5	57	2	41	0	11	676	5808	113	9
B	116767	IL2/IL2R alpha/beta/gamma/JAK1/LCK/JAK3/SHC/GRB2/SOS1/GAB2/SHP2/PI3K	2885;3558;3559;3560;3561;3640;3716;3718;3932;5290;5295;5781;6464;6654;9846	217;153;272;551;369;131;1154;1124;509;1068;724;593;584;1333;676	0	8	4	67	4	85	0	18	584	9458	178	15
B	48629	EGF:p-EGFR:p-ERBB2:GRB2:GAB1:PIK3R1	1950;1956;2064;2549;2885;5295	1207;1210;1255;724;217;724	0.5	8	12.5	61	9.5	68	3	30	965.5	5337	167	6
B	132689	IL5/IL5RA/CSF2RB (hexamer)/JAK2/JAK2/SHP2/GRB2	1439;2885;3567;3568;3717;5781	897;217;134;420;1132;593	0	6	6.5	38	1	11	0	7	506.5	3393	62	6
B	204172	PDGFR-aa:PI3K	5156;5290;5291;5293;5295;5296	1089;1068;1070;1044;724;728	0	1	8	51	1.5	15	0	9	1056	5723	76	6
B	114645	IL2/IL2R alpha/beta/gamma/JAK1/LCK/JAK3/SHC/GRB2/SOS1/GAB2	2885;3558;3559;3560;3561;3640;3716;3718;3932;6464;6654;9846	217;153;272;551;369;131;1154;1124;509;584;1333;676	0	5	3.5	44	3	71	0	17	530	7073	137	12
B	116262	TRIP6/p130 Cas/FAK1/Paxillin	1398;5747;5829;7205;9564	304;1074;591;476;870	0	0	8	56	7	82	0	1	591	3315	139	5
B	130579	ErbB4/ErbB2/epiregulin	2064;2066;2069	1255;1308;169	0	2	12	34	2	15	2	9	1255	2732	60	3
B	126439	ErbB4/ErbB4/neuregulin 1 beta/neuregulin 1 beta/Fyn	2066;2534;3084	1308;537;645	1	3	10	33	2	13	0	2	645	2490	51	3
B	529731	p21(ras)GAP-Fyn-Lyn-Yes complex; thrombin stimulated	2534;4067;5921;7525	537;512;1047;543	0	0	11	39	10	33	1.5	7	540	2639	79	4
B	204144	PDGFR-bb:STAT5	1436;5159;6776;6777	972;1106;794;787	1	4	10	41	5	18	1	6	883	3659	69	4
B	527583	PSD95-FYN-NR2A complex	1742;2534;2903	767;537;1464	0	0	10	31	10	28	0	1	767	2768	60	3
B	55183	PI3K:CD2AP:p-Nephrin:Fyn:NEPH1	23607;2534;4868;5291;5296;55243;58510	639;537;1241;1070;728;757;536	0	0	7	50	3	38	0	7	728	5508	95	7
B	205997	insulin receptor_p:IRS_p:PI3K	3643;3667;5290;5291;5293;5295;5296;8471;8660	1382;1242;1068;1070;1044;724;728;1257;1338	0	5	9	82	6	153	1	21	1070	9853	261	9
B	30177	PDGF:Phospho-PDGF receptor dimer:Crk:p130Cas:C3G	1398;1436;2889;5155;5159;9564	304;972;1095;241;1106;870	0	0	7.5	55	5.5	28	0.5	6	921	4588	89	6
B	117660	LAT/GRAP2/SLP76/VAV1/ITK/PLCgamma1	27040;3702;3937;5335;7409;9402	269;620;533;1290;845;330	0.5	5	7	46	2.5	26	0	14	576.5	3887	91	6
B	130480	PI3K regualtory subunit polypeptide 1/IRS2/SHIP	3635;5295;8660	1189;724;1338	1	2	13	35	6	72	1	3	1189	3251	112	3
B	132858	IL3/IL3RA/CSF2RB (dodecamer)/JAK2/JAK2/SHC/GRB2/GAB2/PI3K	1439;2885;3562;3563;3717;5290;5295;6464;9846	897;217;152;378;1132;1068;724;584;676	0	5	5	57	1	42	0	7	676	5828	111	9
B	48270	SHP2:SFKs:p-KIT:sSCF dimer:p-KIT	3815;4067;4254;5781	976;512;273;593	0	2	11	36	6.5	23	1.5	7	552.5	2354	68	4
B	130813	ErbB4/ErbB2/neuregulin 4	145957;2064;2066	115;1255;1308	0	2	12	34	2	15	2	9	1255	2678	60	3
B	170272	agrin/Integrin-alpha/Integrin-beta/dystroglycan 1/SRC/FAK/Paxillin/PKL/PIX/PAKs/dystrophin/actin/laminin/cortactin/Ach R/RAPSYN/utrophin	1128;1605;1756;2017;3672;3688;375790;3910;57144;5747;58;5829;5913;6714;7402;9459;9815	460;895;3685;550;1179;801;2045;1823;719;1074;377;591;412;536;3433;776;759	0	20	4	90	5	192	0	39	776	20115	341	17
B	48640	EGF:p-EGFR:p-ERBB2:GRB2:GAB1:PI3K	1950;1956;2064;2549;2885;5290;5295	1207;1210;1255;724;217;1068;724	0	8	12	62	6	69	0	30	1068	6405	169	7
B	197895	CD28:CD80/CD86:PI3K	5290;5291;5293;5295;5296;940;941;942	1068;1070;1044;724;728;220;288;329	0	1	4.5	40	1.5	16	0	9	726	5471	66	8
B	120147	ErbB4/ErbB2/HBEGF	1839;2064;2066	208;1255;1308	2	7	12	34	2	16	2	9	1255	2771	66	3
B	116668	FAK/Src-Yes-Fyn/p130 CAS/CRK/DOCK1/ELMO1	1398;1793;2534;5747;9564;9844	304;1865;537;1074;870;727	0	5	8	59	6.5	60	0	3	798.5	5377	127	6
B	202613	PI3K:JAK1:IL-7R:JAK3	3561;3575;3640;3716;3718;5290;5291;5293;5295;5296	369;459;131;1154;1124;1068;1070;1044;724;728	0	1	4.5	51	2	27	1	19	886	7871	98	10
B	526972	PDGFRA-PLC-gamma-1-PI3K-SHP-2 complex; PDGF stimulated	5156;5295;5335;5781	1089;724;1290;593	0.5	3	13.5	52	6.5	21	0.5	7	906.5	3696	83	4
B	202285	JAK2:IL-3R:JAK1:STAT5	1439;3563;3716;3717;6776;6777	897;378;1154;1132;794;787	0	4	6.5	43	3.5	21	0	6	845.5	5142	74	6
B	133116	VEGFR2 (dimer)/VEGFA (dimer)/IQGAP1/VE-cadherin/beta catenin/alpha catenin	1003;1495;1499;3791;7422;8826	784;906;781;1356;412;1657	1.5	10	6.5	40	6.5	50	6.5	48	845	5896	148	6
B	531348	ZO1-(beta)cadherin-(VE)cadherin-VEGFR2 complex	1003;1499;3791;7082	784;781;1356;1748	0	3	8.5	46	13	95	4	21	1070	4669	165	4
B	128967	ErbB4/EGFR/neuregulin 4	145957;1956;2066	115;1210;1308	2	5	16	38	2	35	2	19	1210	2633	97	3
B	133594	ErbB4/ErbB2/betacellulin	2064;2066;685	1255;1308;178	0	2	12	34	2	15	2	9	1255	2741	60	3
B	48384	p-JAK2:SFKs:p-KIT complex:p-STATs	3717;3815;4254;6714;6777	1132;976;273;536;787	0	2	11	47	6	25	0	2	787	3704	76	5
B	123113	Syndecan-3/Fyn/Cortactin	2017;2534;9672	550;537;442	0	12	10	31	10	37	0	11	537	1529	91	3
B	198989	PI3K:JAK2:EPOR	2057;3717;5290;5291;5293;5295;5296	508;1132;1068;1070;1044;724;728	0	1	9	59	1	15	0	9	1044	6274	84	7
BC	526553	60S APC containing complex	10376;27175;324;7283;7846;84790;8826	451;451;2843;451;451;449;1657	0	29	10	55	9	110	15	78	451	6753	272	7
BC	45225	EGF:p-6Y-EGFR:p-Y371-CBL:GRB2:CIN85:Endophilin:Epsin:Eps15R:Eps15:Clathrin	1173;1175;1211;1213;160;163;1950;1956;2060;2885;29924;30011;58513;6456;8027;867;9146	435;142;248;1675;977;951;1207;1210;896;217;662;665;864;352;540;906;777	0	23	3	72	5	155	7	153	777	12724	403	17
BCD	531320	Large Drosha complex	10521;11100;1653;1654;1655;1665;2130;22913;23435;2521;29102;3187;3192;3608;3609;4670;54487;6732;8148;9987	731;856;740;662;614;795;661;306;414;526;1374;449;825;390;898;730;773;655;592;420	1	53	3	90	9	210	7	151	661.5	13411	504	20
BCD	31495	capped; methylated pre-mRNP:CBC complex	10236;10949;220988;22916;27316;2962;2963;3178;3181;3183;3184;3185;3187;3188;3190;3191;3192;4670;4686;5093;5094;5430;5431;5432;5433;5434;5435;5436;5437;5438;5439;5440;5441;5725	636;305;378;156;391;517;249;372;353;306;355;415;449;449;464;589;825;730;790;356;366;1970;1174;275;142;210;127;172;150;125;117;58;67;557	1	71	2	131	6	308	5.5	273	361	14595	783	34
BCD	187959	SHC1;GRB2;SOS1;IQGAP1;RACGAP1;VAV2;VAV3;AP2A1;AP2B1;AP2S1;CBLB;PTPN11;KRT7;KRT8;KRT17;KRT18;PLEC;EPPK1;CD59;HIST3H3;SNRPD2;MPRIP;SMU1	10451;1175;160;163;23164;2885;29127;3855;3856;3872;3875;5339;55234;5781;6464;6633;6654;7410;8350;83481;868;8826;966	847;142;977;951;1038;217;632;469;483;432;430;4684;513;593;584;118;1333;878;136;5090;982;1657;128	0	51	3	95	8	332	5	160	593	23314	638	23
BD	115435	N-cadherin/Ca2+/beta catenin/alpha catenin/p120 catenin	1000;1495;1499;1500	906;906;781;968	2.5	8	8	46	18	90	12.5	40	906	3561	184	4
BD	122501	N-cadherin/p120 catenin/beta catenin/alpha catenin/LRP5/Axin1	1000;1495;1499;1500;4041;8312	906;906;781;968;1615;862	1	8	6	51	12.5	101	6.5	41	906	6038	201	6
BD	125891	FAK/p130 Cas/Paxillin	5747;5829;9564	1074;591;870	0	0	16	44	30	70	0	1	870	2535	115	3
BD	257848	PDZD2 (PAPIN-1) forms a complex with ERBB2IP (ERBIN) and PKP4 (p0071)	23037;55914;8502	2839;1302;1192	0	1	16	46	29	65	2	8	1302	5333	120	3
BD	795191	emerin	1266;2010;4008;4627;4643;60;6709;80143;9111	329;254;1385;1960;1108;375;2477;211;307	0	32	7	66	11	166	2	49	375	8406	313	9
BD	523887	Emerin complex 1	1266;2010;4008;4627;4643;60;6709;80143	329;254;1385;1960;1108;375;2477;211	0	32	8	66	12.5	165	2.5	47	741.5	8099	310	8
BD	206056	insulin receptor_p:IRS	3643;3667;8471;8660	1382;1242;1257;1338	1	4	11.5	47	34	139	2	12	1297.5	5219	202	4
BD	237408	ITGB4 and EGFR form a complex with LGALS3	1956;3691;3958	1210;1822;250	0	3	16	36	33	83	15	32	1210	3282	154	3
BD	172332	agrin/Integrin-alpha/Integrin-beta/dystroglycan 1/SRC/FAK/Paxillin/PKL/PIX/PAKs/dystrophin/actin	1605;1756;3672;3688;375790;5062;5747;58;5829;6714;8874;9815	895;3685;1179;801;2045;524;1074;377;591;536;803;759	0	10	3.5	56	10	148	1	31	802	13269	245	12
BD	528737	Sam68-p85 P13K-IRS-1-IR signaling complex	10657;3643;3667;5295	443;1382;1242;724	1.5	7	11.5	47	16	89	1.5	10	983	3791	153	4
BD	127737	E-cadherin/Ca2+/gamma catenin/alpha catenin/p120 catenin	1495;1500;3728;999	906;968;745;882	1	5	9.5	47	13.5	90	9.5	35	894	3501	177	4
BD	116551	E-cadherin/Ca2+/beta catenin/alpha catenin/p120 catenin	1495;1499;1500;999	906;781;968;882	2.5	8	8	44	18	102	12.5	41	894	3537	195	4
BD	121047	E-cadherin/Ca2+/beta catenin/alpha catenin/p120 catenin/EPLIN	1495;1499;1500;51474;999	906;781;968;760;882	2	8	6	50	22	144	12	48	882	4297	250	5
BD	202766	Integrin signaling protein complex	11081;1277;1278;1280;1281;1282;1284;1285;1286;1287;1288;1289;1290;1291;1292;1294;1295;1296;1297;1298;1299;1300;1301;1302;1303;1306;1307;1310;1462;1463;1634;176;2006;2239;22801;2335;2817;3339;3371;3655;3672;3673;3674;3675;3676;3678;3679;3680;3681;3682;3683;3684;3685;3687;3688;3689;3690;3691;3693;3694;3695;3696;375790;3914;3918;4060;5747;5829;60;633;6382;63827;6383;6385;7094;7148;7414;80781;83660;8…	352;1464;1366;1487;1466;1669;1712;1670;1690;1691;1691;1838;1499;1028;1019;2944;744;703;921;689;684;680;1818;1736;3063;1388;1604;1142;3396;1321;359;2530;724;556;1188;2477;558;4391;2201;1091;1179;1181;1039;1051;1032;1049;1141;1035;1161;1179;1170;1152;1048;1163;801;769;788;1822;799;788;798;769;2045;1172;1193;338;1074;591;375;368;310;911;201;198;2541;4242;1134;1751;2542;1167;1063;1217;870;742;442	0	30	0	149	1	299	0	134	1142	109951	612	85
BD	523904	Emerin-actin-NMI-(alphaII)spectrin complex	2010;60;6709;9111	254;375;2477;307	2.5	14	10	37	19.5	69	2.5	17	341	3413	137	4
BD	168061	ECM/Integrin-alpha/Integrin-betaTalin/Calpain1/actin/p130cas/FAK/CSK/Paxillin/Vinculin/alpha-actinin	1445;3672;3688;5747;58;5829;7094;7145;7414;7791;823;88;9564	450;1179;801;1074;377;591;2541;1735;1134;572;714;894;870	0	18	5	103	6	177	1	53	870	12932	351	13
BD	122564	FAK/Src-Yes-Fyn/Paxillin	2534;5747;5829	537;1074;591	0	0	10	34	30	74	0	0	591	2202	108	3
BD	203025	JAK:Cytokine receptor:STAT	1271;1438;1439;1441;2057;23765;2690;3454;3455;3459;3460;3554;3556;3559;3560;3561;3563;3566;3568;3570;3572;3575;3577;3579;3581;3587;3588;3594;3595;3597;3598;3601;3716;3717;3718;3953;3977;4352;5618;6772;6773;6774;6775;6776;6777;6778;7297;7850;8809;9180	372;434;897;863;508;866;638;557;515;489;337;569;570;272;551;369;378;825;420;468;918;459;350;360;521;578;325;662;862;427;380;267;1154;1132;1124;1165;1097;635;622;750;851;770;748;794;787;847;1187;398;541;979	0	12	2	155	1.5	110	0	48	574	32588	325	50
BD	206146	insulin receptor_p:IRS_p:Grb2:Sos	2885;3643;3667;6654;6655;8471;8660	217;1382;1242;1333;1332;1257;1338	1	8	8	57	12	153	1	18	1332	8101	236	7
BD	531680	Polycystin-1 multiprotein complex (ACTN1; CDH1; SRC; JUP; VCL; CTNNB1; PXN; BCAR1; PKD1; PTK2; TLN1)	1499;3728;5310;5747;5829;6714;7094;7414;87;9564;999	781;745;4303;1074;591;536;2541;1134;914;870;882	0	14	8	99	11	159	2	43	882	14371	315	11
BD	170255	agrin/Integrin-alpha/Integrin-beta/dystroglycan 1/SRC/FAK/Paxillin/PKL/PIX/PAKs/dystrophin/actin/laminin/cortactin	10298;1605;1756;2017;3672;3688;375790;3909;5747;58;5829;6714;9459;9815	591;895;3685;550;1179;801;2045;3333;1074;377;591;536;776;759	0	22	4	80	11.5	188	0	37	788.5	17192	327	14
BD	130728	Crk/p130 Cas/Paxillin/FAK1	1398;5747;5829;9564	304;1074;591;870	0	0	12	50	18.5	77	0	1	730.5	2839	128	4
BD	127032	FAK/Src-Yes-Fyn/Paxillin/PAK1/betaPIX/PKL/NCK1-2	2534;5058;5747;5829;8440;8874;9815	537;553;1074;591;380;803;759	0	3	5	48	12	121	0	3	591	4697	175	7
BD	202974	Cytokine:Cytokine receptor	1271;1437;1438;1439;1440;1441;200081;2056;2057;23765;2690;3439;3440;3441;3442;3443;3444;3445;3446;3447;3448;3449;3451;3452;3454;3455;3456;3458;3459;3460;3467;3552;3553;3554;3556;3559;356;3560;3561;3562;3563;3565;3566;3567;3568;3569;3570;3572;3574;3575;3576;3577;3578;3579;3581;3586;3587;3588;3589;3592;3593;3594;3595;3596;3597;3598;3600;3601;3603;3605;3606;3716;3717;3718;3953;3976;3977;4049;4254;43…	372;144;434;897;207;863;546;193;508;866;638;189;188;189;189;189;189;189;189;190;189;189;189;189;557;515;187;166;489;337;195;271;269;569;570;272;281;551;369;152;378;153;825;134;420;212;468;918;177;459;99;350;144;360;521;178;578;325;199;253;328;662;862;146;427;380;162;267;1332;155;193;1154;1132;1124;1165;202;1097;205;273;635;622;353;233;1187;398;281;541;979;261	0	4	0	130	0	115	0	30	325	37782	279	89
C	530205	eIF3 complex (EIF3S6; EIF3S5; EIF3S4; EIF3S3; EIF3S6IP; EIF3S2; EIF3S9; EIF3S12; EIF3S10; EIF3S8; EIF3S1; EIF3S7; PCID1)	10480;27335;3646;51386;728689;8661;8662;8663;8664;8665;8666;8667;8668;8669	374;218;445;564;914;1382;814;913;548;357;320;352;325;258	1	25	2	36	5	99	10	142	409.5	7784	302	14
C	6744	Mcm2-7 complex	4171;4172;4173;4174;4175;4176	904;808;863;734;821;719	2.5	12	2.5	14	12	74	15.5	88	814.5	4849	188	6
C	533866	CSA-POLIIa complex	10920;10980;10987;1161;1642;2873;50813;51138;5430;64708;8451;8533;9318;9978	209;327;334;396;1140;527;275;406;1970;264;759;423;450;108	0	11	1	31	1	68	4.5	112	401	7588	222	14
C	7209	Unwinding complex at replication fork	4171;4172;4173;4174;4175;4176;51659;8318;84296;9837	904;808;863;734;821;719;185;566;223;196	0.5	12	1	15	4	84	7.5	103	726.5	6019	214	10
C	7104	Mcm4;6;7 complex	4173;4175;4176	863;821;719	3	6	2	6	7	33	22	64	821	2403	109	3
C	169573	ORC/CDC6/CDT1/Mcm2-7	23594;23595;4171;4172;4173;4174;4175;4176;4998;4999;5000;5001;81620;990	252;712;904;808;863;734;821;719;861;577;436;435;546;560	0.5	16	0.5	18	7	128	6.5	119	715.5	9228	281	14
C	33538	40S:eIF3:eIF1A	1964;2197;27335;3646;3921;6187;6188;6189;6191;6192;6193;6194;6201;6202;6203;6204;6205;6206;6207;6208;6209;6210;6217;6218;6222;6223;6224;6227;6228;6229;6230;6231;6232;6233;6234;6235;728689;8661;8662;8663;8664;8665;8666;8667;8668;8669	144;133;218;445;295;293;243;264;263;263;204;249;194;208;194;165;158;132;151;151;145;130;146;135;152;145;119;83;143;289;125;115;84;156;69;67;914;1382;814;913;548;357;320;352;325;258	1	79	1	67	3	185	6	326	194	12653	657	46
C	63274	26S proteasome	10197;10213;122706;143471;23198;5682;5683;5684;5685;5686;5687;5688;5689;5690;5691;5692;5693;5694;5695;5696;5698;5699;5700;5701;5702;5704;5705;5706;5707;5708;5709;5710;5711;5713;5714;5715;5716;5717;5718;5719;5720;5721;9491;9861	267;310;300;256;1843;269;234;255;261;241;246;248;241;201;205;264;263;239;277;276;219;273;440;433;439;418;406;403;953;908;534;377;504;324;350;223;226;422;456;378;250;239;271;389	0.5	45	1	64	1	89	8	376	274.5	16531	574	44
C	798174	MCM.complex	4171;4172;4173;4174;4175;4176;55388	904;808;863;734;821;719;875	2	12	2	15	7	78	11	89	821	5724	194	7
C	6428	Cohesin Complex	10274;10735;5885;8243;9126	1258;1268;631;1233;1217	1	13	4	19	13	62	15	68	1233	5607	162	5
C	32407	intron-containing complex	10181;10262;10291;10421;10594;10907;10946;10992;11100;1660;22826;23020;23450;23451;24148;2521;4809;4904;51639;55749;57794;57819;6627;6628;6629;6632;6633;6634;6635;6636;6637;8175;8243;83443;84844;9128;9343;9410;9416	815;424;793;341;2335;142;501;895;856;1270;253;2136;1217;1304;941;526;128;324;125;1150;645;95;255;240;225;119;118;126;92;86;76;464;1233;86;110;522;972;357;820	1	45	1	87	3	227	3	247	424	23117	606	39
C	531375	PA700 complex	10213;5700;5701;5702;5704;5705;5706;5707;5708;5709;5710;5711;5713;5714;5715;5716;5717;5718;5719;9861	310;440;433;439;418;406;403;953;908;534;377;504;324;350;223;226;422;456;378;389	1	22	1	29	1.5	54	12	256	412	8893	361	20
C	523327	Cohesin-SA2 complex	10735;5885;8243;9126	1268;631;1233;1217	3	12	3.5	15	13	52	17.5	67	1225	4349	146	4
C	527640	DNA synthesome complex (17 subunits)	10714;23649;5111;54107;5422;5424;5425;5426;5427;5557;5558;56655;57804;5981;6117;7150;7153;7155	466;598;261;147;1462;1107;469;2286;527;420;509;117;107;1147;616;765;1531;1621	1	23	1.5	34	4	174	7.5	188	562.5	14156	419	18
C	795803	L2DTL	10980;10987;1642;2873;3308;5111;51138;51514;8533;9318	327;334;1140;527;840;261;406;730;423;450	1	14	2.5	24	2.5	52	9	106	436.5	5438	196	10
C	115369	Ku/Artemis/DNA-PKcs (dimer)/POLL/XRCC4 (dimer)/Ligase IV	2547;27343;3981;5591;64421;7518;7520	609;575;911;4128;692;336;732	1	38	0	8	10	74	4	178	692	7983	298	7
C	794374	DNA synthesome	5111;5422;5424;5557;5558;5981;5982;5983;5984;5985;6117;6118;6119;7150;7153	261;1462;1107;420;509;1147;354;356;363;340;616;270;121;765;1531	1	20	1	23	4	117	6	151	420	9622	311	15
C	64854	26S proteasome	10197;10213;5682;5683;5684;5685;5686;5687;5688;5689;5690;5691;5692;5693;5694;5695;5696;5698;5699;5700;5701;5702;5704;5705;5706;5707;5708;5709;5710;5711;5713;5714;5715;5716;5717;5718;5719;5720;5721;9491;9861	267;310;269;234;255;261;241;246;248;241;201;205;264;263;239;277;276;219;273;440;433;439;418;406;403;953;908;534;377;504;324;350;223;226;422;456;378;250;239;271;389	1	44	1	63	1	84	9	370	273	14132	561	41
C	118451	Ku/Artemis/DNA-PKcs (dimer)/Pol Mu/XRCC4 (dimer)/Ligase IV	2547;27434;3981;5591;64421;7518;7520	609;494;911;4128;692;336;732	1	38	0	8	10	71	4	178	692	7902	295	7
C	171804	PA700 Activator	10213;5709;5710;5717;5718;6184;6185	310;534;377;422;456;607;631	1	7	1	9	1	17	11	81	456	3337	114	7
C	793803	DSS1	10213;114823;25896;29901;5431;54973;55174;55656;55756;55795;5700;5701;5702;5705;5706;5707;5708;5709;5710;5713;5714;5716;5717;5718;5719;57508;675;7979;80789;92105	310;800;962;358;1174;600;710;995;658;399;440;433;439;406;403;953;908;534;377;324;350;226;422;456;378;1204;3418;70;1019;963	0.5	26	1	31	2	81	8.5	306	448	20689	444	30
C	243356	DDX3X forms a complex with translation initiation factor eIF3 (EIF3	3646;728689;8661;8662;8663;8664;8665;8666;8667;8668;8669;9641	445;914;1382;814;913;548;357;320;352;325;258;716	1	20	2	24	5	95	10	119	496.5	7344	258	12
C	527918	PA28-20S proteasome	5682;5683;5684;5685;5686;5687;5688;5689;5690;5691;5692;5693;5694;5695;5720;5721	269;234;255;261;241;246;248;241;201;205;264;263;239;277;250;239	0.5	19	1	28	1	20	7.5	102	247	3933	169	16
C	528163	eIF3 complex (EIF3S6; EIF3S5; EIF3S4; EIF3S3; EIF3S6IP; EIF3S2; EIF3S9; EIF3S12; EIF3S10; EIF3S8; EIF3S1; EIF3S7)	27335;3646;51386;728689;8661;8662;8663;8664;8665;8666;8667;8668;8669	218;445;564;914;1382;814;913;548;357;320;352;325;258	1	23	2	35	5	96	10	132	445	7410	286	13
C	33415	40S ribosomal complex	2197;3921;6187;6188;6189;6191;6192;6193;6194;6201;6202;6203;6204;6205;6206;6207;6208;6209;6210;6217;6218;6222;6223;6224;6227;6228;6229;6230;6231;6232;6233;6234;6235	133;295;293;243;264;263;263;204;249;194;208;194;165;158;132;151;151;145;130;146;135;152;145;119;83;143;289;125;115;84;156;69;67	1	56	1	43	2	90	5	200	151	5663	389	33
C	169802	26S Proteasome	10213;5682;5683;5684;5685;5686;5687;5688;5689;5690;5691;5692;5693;5694;5695;5709;5710;5717;5718;6184;6185	310;269;234;255;261;241;246;248;241;201;205;264;263;239;277;534;377;422;456;607;631	1	26	1	36	1	36	9	180	263	6781	278	21
C	4298	multiubiquitinated Cyclin B:Cdc2:Cdc20:phospho-APC/C complex	10393;11065;246184;29882;29945;51433;51434;51529;6233;64682;7311;7314;7316;7321;7324;8697;8881;891;983;991;996	185;179;85;822;808;755;599;196;156;1944;128;229;685;147;193;597;620;433;297;499;830	0	24	1	22	4	174	7	146	433	10387	366	21
C	132296	Ku/Artemis/DNA-PKcs (dimer)/DNTT/XRCC4 (dimer)/Ligase IV	1791;2547;3981;5591;64421;7518;7520	509;609;911;4128;692;336;732	1	38	1	9	10	71	4	179	692	7917	297	7
C	241445	BIRC4 forms a complex with BIRC5; HSPA4; and HSP90AA1	3308;331;332;3320	840;497;165;854	2	28	3.5	17	8	34	18.5	67	668.5	2356	146	4
C	120807	Ku/Artemis/DNA-PKcs (dimer)/Pol Mu/XRCC4 (dimer)/Ligase IV/XLF (dimer)	2547;27434;3981;5591;64421;7518;7520;79840	609;494;911;4128;692;336;732;299	0.5	38	0	8	9	79	2.5	179	650.5	8201	304	8
C	7803	multiubiquitinated Cyclin A associated with MCC:APC/C complex	10393;11065;246184;29882;29945;4085;51433;51434;51529;6233;64682;701;7311;7314;7316;7321;7324;8697;8881;8900;9184;983;991;996	185;179;85;822;808;205;755;599;196;156;1944;1050;128;229;685;147;193;597;620;465;328;297;499;830	0	25	1	25	4	186	5	155	396.5	12002	391	24
C	527879	PA700-20S-PA28 complex	10213;5682;5683;5684;5685;5686;5687;5688;5689;5690;5691;5692;5693;5694;5695;5700;5701;5702;5704;5705;5706;5707;5708;5709;5710;5711;5713;5714;5715;5716;5717;5718;5719;5720;5721;9861	310;269;234;255;261;241;246;248;241;201;205;264;263;239;277;440;433;439;418;406;403;953;908;534;377;504;324;350;223;226;422;456;378;250;239;389	1	41	1	57	1	74	9	358	293.5	12826	530	36
C	10475	Elongation complex	1022;1025;11198;2068;2071;25920;2962;2963;2965;2966;2967;2968;4331;51497;5430;5431;5432;5433;5434;5435;5436;5437;5438;5439;5440;5441;6749;6827;6829;6917;6921;6923;6924;7469;7936;8178;902;904;905;9150	346;372;1047;760;782;580;517;249;548;395;308;462;309;590;1970;1174;275;142;210;127;172;150;125;117;58;67;709;117;1087;301;112;161;798;539;380;621;323;726;730;961	0	33	0	52	2	258	2.5	199	376	19417	542	40
C	795276	emerin C24	2010;23450;3192;4171;4173;4175;708	254;1217;825;904;863;821;282	3	27	2	32	15	98	11	82	825	5166	239	7
C	523320	Cohesin-SA1 complex	10274;5885;8243;9126	1258;631;1233;1217	3	12	3.5	15	12	49	17.5	61	1225	4339	137	4
C	4349	multiubiquitinated Securin in complex with CDC20:phospho-APC/C	10393;11065;246184;29882;29945;51433;51434;51529;6233;64682;7311;7314;7316;7321;7324;8697;8881;9232;991;996	185;179;85;822;808;755;599;196;156;1944;128;229;685;147;193;597;620;202;499;830	0	22	1	16	4	160	6.5	131	364	9859	329	20
C	533645	CDC5L core complex	10286;10985;27339;3312;5356;988	225;2671;504;646;514;802	1	17	1	14	9	64	9	96	580	5362	191	6
C	7116	pre-replicative complex (Orc1-minus)	23594;23595;4171;4172;4173;4174;4175;4176;4999;5000;5001;81620;84515;990	252;712;904;808;863;734;821;719;577;436;435;546;840;560	0	15	1	19	5.5	112	6.5	118	715.5	9207	264	14
C	33524	eIF3 subunits complex	27335;3646;728689;8661;8662;8663;8664;8665;8666;8667;8668;8669	218;445;914;1382;814;913;548;357;320;352;325;258	1	20	2	24	5	95	10	121	401	6846	260	12
C	532521	MCM2-MCM4-MCM6-MCM7 complex	4171;4173;4175;4176	904;863;821;719	2.5	8	2.5	9	14.5	55	21	70	842	3307	142	4
C	6984	RPA:Cdc45:CDK:DDK:Mcm10:pre-replicative complex	1017;10926;23594;23595;29935;4171;4172;4173;4174;4175;4176;4998;4999;5000;5001;55388;6117;6118;6119;8317;8318;84515;990	298;674;252;712;261;904;808;863;734;821;719;861;577;436;435;875;616;270;121;574;566;840;560	0	21	1	33	5	180	5	158	616	13777	392	23
C	528885	26S proteasome	5682;5683;5684;5685;5686;5687;5688;5689;5690;5691;5692;5693;5694;5695;5700;5701;5702;5704;5705;5706;5710;5719	269;234;255;261;241;246;248;241;201;205;264;263;239;277;440;433;439;418;406;403;377;378	1	33	1.5	45	1	43	9	227	263.5	6738	348	22
C	794899	PBAF.2	196528;203068;55193;60;6597;6598;6599;6601;6602;6603;6605;71;86	1835;444;1602;375;1679;385;1105;1214;515;531;411;375;429	1	24	2	46	9	140	9	101	515	10900	311	13
C	530557	40S ribosomal subunit; cytoplasmic	140032;3921;6187;6188;6189;6191;6192;6193;6194;6201;6202;6203;6204;6205;6206;6207;6208;6209;6210;6217;6218;6222;6223;6224;6227;6228;6229;6230;6231;6232;6233;6234;6235	263;295;293;243;264;263;263;204;249;194;208;194;165;158;132;151;151;145;130;146;135;152;145;119;83;143;289;125;115;84;156;69;67	1	56	1	44	2	90	5	202	152	5793	392	33
C	527090	CDCA5-PDS5A-RAD21-SMC1A-PDS5B-SMC3 complex	113130;23047;23244;5885;8243;9126	252;1447;1337;631;1233;1217	3	17	2	12	14	86	13	74	1225	6117	189	6
CD	530247	DNA synthesome complex (13 subunits)	10714;23649;5111;5422;5424;5425;5557;5558;57804;5981;6117;7150;7153;7155	466;598;261;1462;1107;469;420;509;107;1147;616;765;1531;1621	1	23	2	30	6.5	163	9.5	172	607	11079	388	14
CD	43195	centrosome	10121;10142;10382;10383;10540;1069;10733;10806;11064;11116;11190;11258;121441;1453;1454;1639;1778;1781;203068;22897;22919;22981;22994;22995;23332;3320;4751;4957;5048;5108;5116;5347;54820;55125;55142;5518;5566;55722;55755;5577;55835;7277;7283;7531;7532;7840;7846;79959;80184;80254;80321;84131;8481;8636;8655;95681;9662;9702;9738;9793;9814;983	376;3907;444;445;406;172;970;713;2325;399;2442;186;667;415;416;1278;4646;638;444;1460;268;1382;1080;1654;1538;854;445;805;410;2024;3336;603;335;2537;235;589;351;647;1893;418;1338;448;451;255;247;4169;451;659;2479;703;597;722;1012;119;89;373;1140;500;991;2032;1242;297	0	90	1	117	7	545	3.5	385	642.5	64467	1137	62
CD	43352	Mature centrosomes enriched in gamma-TURC complexes	10121;10142;10382;10383;10426;10540;1069;10733;10806;10844;11064;11116;11190;11258;114791;121441;1453;1454;1639;1778;1781;203068;22897;22919;22981;22994;22995;23332;27175;27229;3320;4751;4957;5048;5108;5116;5347;54820;55125;55142;5518;5566;55722;55755;5577;55835;7277;7283;7531;7532;7840;7846;79959;80184;80254;80321;84131;8481;85378;8636;8655;95681;9662;9702;9738;9793;9814;983	376;3907;444;445;907;406;172;970;713;902;2325;399;2442;186;1024;667;415;416;1278;4646;638;444;1460;268;1382;1080;1654;1538;451;666;854;445;805;410;2024;3336;603;335;2537;235;589;351;647;1893;418;1338;448;451;255;247;4169;451;659;2479;703;597;722;1012;1819;119;89;373;1140;500;991;2032;1242;297	0	91	1	123	6	551	3	410	662.5	70236	1175	68
CD	526187	CEN complex	1058;1059;1060;11198;11335;1642;2091;22837;23091;2491;25962;29127;3309;3312;51593;51773;55717;57332;6015;6045;64105;648;64946;6749;79019;79172;79682;79801;79948;80829;8451;8467;91687;9493;9589;9688;9785	140;599;943;1047;183;1140;321;1166;1564;756;1812;632;654;646;876;1441;1224;389;406;336;269;326;247;709;180;300;418;672;746;570;759;1052;390;960;396;819;1227	0	67	1	65	9	498	3	241	654	26315	871	37
CD	43473	cNAP-1 depleted centrosome	10121;10142;10382;10383;10540;1069;10733;10806;11064;11116;11258;121441;1453;1454;1639;1778;1781;203068;22897;22919;22981;22994;22995;23332;3320;4751;4957;5048;5108;5116;5347;54820;55125;55142;5518;5566;55722;55755;5577;55835;7277;7283;7531;7532;7840;7846;79959;80184;80254;80321;84131;8481;8636;8655;95681;9662;9702;9738;9793;9814;983	376;3907;444;445;406;172;970;713;2325;399;186;667;415;416;1278;4646;638;444;1460;268;1382;1080;1654;1538;854;445;805;410;2024;3336;603;335;2537;235;589;351;647;1893;418;1338;448;451;255;247;4169;451;659;2479;703;597;722;1012;119;89;373;1140;500;991;2032;1242;297	0	89	1	116	7	534	4	382	638	62025	1121	61
CD	526269	Toposome	10594;1660;3183;6732;6749;7153;9188	2335;1270;306;655;709;1531;783	3	19	5	31	17	125	10	132	783	7589	307	7
CD	32579	ATAC B Complex	10262;10594;10907;10992;22916;23020;23450;23451;24148;2962;2963;4686;4809;51639;5430;5431;5432;5433;5434;5435;5436;5437;5438;5439;5440;5441;57819;6426;6427;6431;6432;6628;6632;6633;6634;6635;6636;6637;83443;9343;9410;9416	424;2335;142;895;156;2136;1217;1304;941;517;249;790;128;125;1970;1174;275;142;210;127;172;150;125;117;58;67;95;248;221;344;238;240;119;118;126;92;86;76;86;972;357;820	1	41	1	75	1	286	3	280	215.5	20184	682	42
CD	45254	EGF:p-6Y-EGFR:p-Y371-CBL:CIN85:Endophilin:Epsin:Eps15R:Eps15	1950;1956;2060;29924;30011;58513;6456;8027;867;9146	1207;1210;896;662;665;864;352;540;906;777	0	6	2.5	47	12	125	8.5	87	820.5	8079	265	10
CD	4025	Cdc45:CDK:DDK:Mcm10:claspin:pre-replicative complex	1017;10926;23594;23595;4171;4172;4173;4174;4175;4176;4998;4999;5000;5001;55388;63967;8317;8318;84515;990	298;674;252;712;904;808;863;734;821;719;861;577;436;435;875;1339;574;566;840;560	0	19	1	33	6.5	196	5.5	136	715.5	13848	384	20
CD	43547	Nlp-depleted centrosome	10121;10142;10382;10383;10540;1069;10733;10806;11064;11116;11190;11258;121441;1453;1454;1639;1778;1781;203068;22897;22919;22994;22995;23332;3320;4751;4957;5048;5108;5116;5347;54820;55125;55142;5518;5566;55722;55755;5577;55835;7277;7283;7531;7532;7840;7846;79959;80184;80254;80321;84131;8481;8636;8655;95681;9662;9702;9738;9793;9814;983	376;3907;444;445;406;172;970;713;2325;399;2442;186;667;415;416;1278;4646;638;444;1460;268;1080;1654;1538;854;445;805;410;2024;3336;603;335;2537;235;589;351;647;1893;418;1338;448;451;255;247;4169;451;659;2479;703;597;722;1012;119;89;373;1140;500;991;2032;1242;297	0	89	1	117	7	537	4	384	638	63085	1127	61
CD	795474	N-CoR-1	10155;10291;10847;23450;6597;6598;6599;6601;9611	835;793;3230;1217;1679;385;1105;1214;2440	2	24	2	16	21	176	11	88	1214	12898	304	9
CD	533654	CDC5L complex	10250;10262;10286;10985;10992;1778;22828;23451;27316;27339;3312;3608;51503;5356;5499;5591;6421;6426;6427;6626;6627;6632;6633;6634;6925;7153;8493;9689;9814;988	904;424;225;2671;895;4646;1271;1304;391;504;646;390;229;514;341;4128;707;248;221;282;255;119;118;126;671;1531;605;353;1242;802	1	62	1	76	6	456	5	380	509	26763	974	30
CD	51616	Rev multimer-bound HIV-1 mRNA:Crm1:Ran:GTP:NPC	10762;11097;129401;23165;23225;23279;23511;23636;348995;4927;4928;53371;55746;57122;5901;5903;7175;7514;79023;79902;8021;8086;81929;8480;9631;9688;9818;9883;9972	468;423;326;2012;1887;1436;1749;522;380;741;1800;507;1156;925;216;3224;2363;1071;326;656;2090;546;421;368;1391;819;599;984;1475	0	39	1	34	9	487	7	267	819	30881	827	29
CD	794206	MMS22L-NFKBIL2	11198;253714;4171;4172;4173;4174;4175;4176;4796;6749	1047;1243;904;808;863;734;821;719;1378;709	2.5	27	2.5	24	9.5	108	10.5	117	842	9226	276	10
CD	6928	CDK:DDK:Mcm10:pre-replicative complex	1017;10926;23594;23595;4171;4172;4173;4174;4175;4176;4998;4999;5000;5001;55388;8317;84515;990	298;674;252;712;904;808;863;734;821;719;861;577;436;435;875;574;840;560	0	17	1	28	6.5	157	5.5	126	715.5	11943	328	18
CD	24516	Nuclear Pore Complex (NPC)	10762;11097;129401;23165;23225;23279;23511;23636;348995;4927;4928;53371;55746;57122;5903;7175;79023;79902;8021;8086;81929;8480;9631;9688;9818;9883;9972	468;423;326;2012;1887;1436;1749;522;380;741;1800;507;1156;925;3224;2363;326;656;2090;546;421;368;1391;819;599;984;1475	0	29	0	30	9	475	7	251	819	29594	785	27
CD	45286	EGF:p-6Y-EGFR:p-Y371-CBL:Ub-CIN85:Endophilin:Epsin:Eps15R:Eps15	10254;1950;1956;2060;29924;30011;58513;6233;6456;7311;7314;7316;867;9146	525;1207;1210;896;662;665;864;156;352;128;229;685;906;777	0.5	22	1.5	52	4.5	138	8.5	125	675	9262	337	14
CD	795537	ICEN	1058;1059;1060;11198;11335;1642;1912;2091;23091;2491;25962;29127;3065;3309;3312;51593;51773;55023;55839;57332;6015;6045;64105;648;64946;6749;79019;79172;79682;79801;79872;80152;80829;8451;8467;91687;9493;9589;9688;9785	140;599;943;1047;183;1140;858;321;1564;756;1812;632;482;654;646;876;1441;1821;353;389;406;336;269;326;247;709;180;300;418;672;491;561;570;759;1052;390;960;396;819;1227	0	78	0	65	9	558	4	265	615.5	27745	966	40
CD	43260	Centrosomes containing recruited CDK11p58	10121;10142;10382;10383;10540;1069;10733;10806;11064;11116;11190;11258;121441;1453;1454;1639;1778;1781;203068;22897;22919;22981;22994;22995;23332;3320;4751;4957;5048;5108;5116;5347;54820;55125;55142;5518;5566;55722;55755;5577;55835;7277;7283;728642;7531;7532;7840;7846;79959;80184;80254;80321;84131;8481;8636;8655;95681;9662;9702;9738;9793;9814;983;984	376;3907;444;445;406;172;970;713;2325;399;2442;186;667;415;416;1278;4646;638;444;1460;268;1382;1080;1654;1538;854;445;805;410;2024;3336;603;335;2537;235;589;351;647;1893;418;1338;448;451;780;255;247;4169;451;659;2479;703;597;722;1012;119;89;373;1140;500;991;2032;1242;297;782	0	91	1	126	7	583	4	398	653	66029	1198	64
CD	795655	ALL-1	10284;1108;11091;23028;25942;3065;3066;4297;53615;53981;5901;5928;5929;5931;6595;6598;6599;6601;6872;6878;6880;6883;6908;8189;8467;8819;9219;9343	172;1912;334;876;1273;482;582;3969;291;782;216;425;538;425;1590;385;1105;1214;1893;677;264;161;339;1274;1052;220;668;972	1	67	1	42	7	326	5	150	625	24091	585	28
CD	57235	nucleoporin-associated Rev:Importin-beta:B23 complex	10762;11097;129401;23165;23225;23279;23511;23636;238;348995;3837;4869;4927;4928;53371;55746;57122;5903;5914;7175;79023;79902;8021;8086;81929;8480;9631;9688;9818;9883;9972	468;423;326;2012;1887;1436;1749;522;1620;380;876;294;741;1800;507;1156;925;3224;462;2363;326;656;2090;546;421;368;1391;819;599;984;1475	0	45	1	49	7	515	7	279	819	32846	888	31
CD	530379	ALL-1 supercomplex	10284;1107;11091;23028;25942;3065;3066;4297;53615;53981;5901;5928;5929;5931;6595;6598;6599;6601;6872;6878;6880;6883;6908;8189;8467;8819;9219;9343	172;2059;334;876;1273;482;582;3969;291;782;216;425;538;425;1590;385;1105;1214;1893;677;264;161;339;1274;1052;220;668;972	1	63	1	40	7	308	4.5	140	625	24238	551	28
CD	522979	Emerin complex 52	10212;10971;1152;2010;23592;27250;3008;3068;3190;3191;3192;3609;4001;51691;5934;60;6632;7067;708;7531;8539;8826;9111	427;245;381;254;911;469;219;256;464;589;825;898;586;96;1139;375;119;490;282;255;524;1657;307	1	68	1	100	9	261	8	189	427	11768	618	23
D	525342	Scrib-beta-PIX-GIT1 complex	23513;28964;8874	1655;770;803	0	0	5	15	36	93	2	10	803	3228	118	3
D	522877	SMCC complex	10001;10025;1024;29079;5469;892;9282;9412;9440;9442;9862;9967;9968;9969	246;877;464;270;1581;283;1454;144;651;311;989;955;2177;2174	0	17	0	17	6	179	4.5	74	764	12576	287	14
D	6587	Microtubule-bound kinetochore	10403;1058;1060;1062;1063;10726;11004;11130;11243;1325;147841;151246;151648;220134;22919;23122;23279;23332;23421;2491;25909;25936;332;348235;348995;3619;378708;3796;401541;4085;4928;5048;5347;54820;54821;54908;5501;55055;55143;5516;55166;5519;5528;55746;55839;55920;57082;57122;57405;57551;5903;5905;6232;6249;632;6396;64105;64946;699;701;7514;79003;79019;79023;79172;79682;79902;79980;80152;80776;8…	642;140;943;2701;3114;331;725;277;205;105;197;1265;561;255;268;1506;1436;1538;177;756;2275;281;165;121;380;918;138;744;288;205;1800;410;603;335;1250;605;323;591;280;309;268;667;602;1156;353;522;2342;925;224;1001;3224;587;84;1427;100;322;269;247;1085;1050;1071;205;180;326;300;418;656;356;561;175;345;421;898;464;718;673;390;779;328;344;2209;2032;499	0	37	1	89	6	1061	2	327	464	59966	1514	83
D	531262	MOF complex	11091;4297;5929;6045;6872;6878;6880;8085;84148;9739	334;3969;538;336;1893;677;264;5537;467;1707	1	22	1	15	10	171	0.5	17	607.5	15722	225	10
D	794738	MLL1-WDR5	10445;10856;11091;124944;125476;1876;23269;26121;26168;27043;284058;3054;3308;4149;4297;51230;54881;57680;5929;6045;6872;6874;6878;6879;6880;81887;84148;8607;9070	534;463;334;192;228;281;2856;499;574;1130;1105;2035;840;160;3969;1012;929;2302;538;336;1893;1085;677;349;264;734;467;456;628	1	35	0	32	8	300	2	115	574	26870	482	29
D	13489	ATM associated with DNA double-strand break ends	3014;472;9656	143;3056;2089	4	9	2	5	20	140	4	11	2089	5288	165	3
D	4209	MCC:APC/C complex	10393;11065;246184;29882;29945;4085;51433;51434;51529;64682;701;7321;7324;8697;8881;9184;991;996	185;179;85;822;808;205;755;599;196;1944;1050;147;193;597;620;328;499;830	0	7	1	15	5.5	162	4	102	548	10042	286	18
D	527070	AXIN-APC-betaCatenin-GSK3B complex	1499;2932;324;8312	781;433;2843;862	0	3	5	23	20.5	117	0	13	821.5	4919	156	4
D	527182	BRD4 complex	1025;23476;5469;904;9282;9440;9862;9968	372;1362;1581;726;1454;651;989;2177	1	17	1	8	9.5	111	4	48	1175.5	9312	184	8
D	168310	IKK-alpha/MEKK1/NIK	1147;4214;9448	745;1512;1320	0	0	0	4	27	87	1	5	1320	3577	96	3
D	530024	TNF-alpha/NF-kappa B signaling complex (SEC16A; CHUK; IKBKB; NFKB2; REL; IKBKG; MAP3K14; RELA; FBXW7; USP2)	1147;3551;4791;55294;5966;5970;8517;9020;9099;9919	745;756;900;707;619;551;487;947;605;2357	0	12	0.5	26	7.5	113	0.5	18	726	8674	169	10
D	167641	METS/DP103/Sin3/HDAC2/5/NCOR2/SMRT	11218;2117;25942;3066;9612	824;512;1273;582;2524	2	16	1	10	14	123	1	12	824	5715	161	5
D	524160	Condensin I-PARP-1-XRCC1 complex	10051;10592;142;23397;64151;7515;9918	1288;1197;1014;741;1015;633;1401	3	29	1	9	20	137	7	68	1015	7289	243	7
D	522766	CF IIAm complex (Cleavage factor IIAm complex)	10978;11051;11052;11338;2071;2968;4076;4361;51585;51692;5725;6421;7082;7307;79869;8449	425;227;551;475;782;462;709;708;1555;684;557;707;1748;240;514;1041	0	19	1	52	8	202	3.5	72	620.5	11385	345	16
D	795773	CtBP	10919;1487;1488;23028;23186;3065;3066;55758;6239;6935;7764;79813;84458;8535;9425;9839	1210;440;985;876;482;482;582;553;1742;1124;1048;1298;433;560;544;1214	0	16	0.5	15	10	168	2	49	729	13573	248	16
D	793917	B-WICH	10514;2074;23451;267004;58517;7913;79925;9031;9188	1332;1493;1304;593;843;375;1822;1483;783	2	17	1	12	17	168	1	38	1304	10028	235	9
D	526052	Replication-coupled CAF-1-MBD1-ETDB1 complex	10036;4152;9869	956;605;1291	0	1	1	4	32	72	1	4	956	2852	81	3
D	526523	TRAP complex	10025;5469;7067;9282;9440;9862;9967;9968	877;1581;490;1454;651;989;955;2177	0	15	0.5	13	8.5	150	5	51	972	9174	229	8
D	63475	Synaptonemal Complex	10274;10388;10734;10735;11083;256126;27127;3306;50511;56158;5885;6847;7329;8243;8468;9126;93426;9985	1258;1530;1225;1268;2240;218;1235;639;236;123;631;976;158;1233;327;1217;351;547	0.5	23	1	28	1.5	109	0.5	82	807.5	15412	242	18
D	21709	3;-polyadenylated; capped mRNA complex	10189;10250;10921;11338;22916;4116;4686;4799;51362;6426;6427;6428;6429;6430;6431;6432;65109;7307;8683;9295;9785;9939	264;904;305;475;156;146;790;1120;579;248;221;164;494;272;344;238;483;240;221;484;1227;174	1	21	1	46	11.5	372	1.5	41	288.5	9549	480	22
D	130340	ATF2/BRCA1/Oct-1/Neurofibromin	1386;4763;5451;672	505;2839;743;1884	0.5	3	0	3	22	112	1	6	1313.5	5971	124	4
D	132523	mTORC1/PRAS40/DEPTOR/PML	2475;5371;57521;64223;64798;84335	2549;882;1335;326;409;256	0	3	0	4	22	123	4	27	645.5	5757	157	6
D	132073	BRCA1/BACH1/BARD1/TopBP1	11073;580;672	1522;777;1884	1	3	0	1	21	85	2	7	1522	4183	96	3
D	170985	NCOA62/TSC2/TRAP220	22938;5469;7249	536;1581;1807	2	10	3	11	35	89	0	5	1581	3924	115	3
D	123535	MRN complex/ATM/MDC1/H2AX/RNF8/53BP1	10111;3014;4361;4683;472;7158;9025;9656	1312;143;708;754;3056;1977;485;2089	2	24	1.5	12	19	341	3	36	1033	10524	413	8
D	130329	BRCA1/BARD1/CTIP/M/R/N Complex	10111;4361;4683;580;5932;672	1312;708;754;777;897;1884	1.5	16	0	3	16	117	2.5	28	837	6332	164	6
D	122875	MRN complex/ATM/MDC1/H2AX/RNF8/53BP1/BRCA1	10111;3014;4361;4683;472;672;7158;9025;9656	1312;143;708;754;3056;1884;1977;485;2089	1	24	1	12	19	392	3	39	1312	12408	467	9
D	531882	DDEF1-CTTN-PXN complex	2017;50807;5829	550;1129;591	2	14	8	28	27	70	0	11	591	2270	123	3
D	65579	Axin:CK1alpha:GSK3B:phospho-APC (20 aa repeat region):PP2A:FAM123B complex	139285;1452;2932;324;5516;5519;5528;8312	1135;365;433;2843;309;667;602;862	0	1	2	19	10.5	122	2.5	34	634.5	7216	176	8
D	21638	Integrin alpha 6:beta 4:Plectin:BP180:Laminin-322 complex	1308;3655;3691;3909;3914;3918;5339	1497;1091;1822;3333;1172;1193;4684	0	6	3	37	12	158	5	67	1497	14792	268	7
D	524861	BASC complex (BRCA1-associated genome surveillance complex)	10111;2956;4292;4361;4436;4683;472;5981;5982;5984;641;672	1312;1360;756;708;934;754;3056;1147;354;363;1417;1884	2	27	1	13	19	217	5	77	1040.5	14045	334	12
D	64524	pre-EJC complex	10189;10250;10921;4799;65109	264;904;305;1120;483	1	4	2	13	10	157	1	9	483	3076	183	5
D	533469	BRCA1-BARD1-BACH1-DNA damage complex II	10111;11073;4361;4683;571;580;5932;672	1312;1522;708;754;736;777;897;1884	1	17	0.5	5	16	143	2	30	837	8590	195	8
D	521576	Anaphase-promoting complex	29882;29945;51433;51434;64682;8697;8881;996	822;808;755;599;1944;597;620;830	0	2	1	7	8.5	123	8	64	781.5	6975	196	8
D	524846	BASC (Ab 81) complex (BRCA1-associated genome surveillance complex)	4292;472;5981;5982;5984;672	756;3056;1147;354;363;1884	1	6	0.5	8	12	105	4.5	27	951.5	7560	146	6
D	122116	mTORC1/PRAS40/DEPTOR	2475;57521;64223;64798;84335	2549;1335;326;409;256	0	1	0	4	16	95	1	20	409	4875	120	5
D	118912	RAF1/BRAF/14-3-3/14-3-3	5894;673;7531	648;766;255	1	5	1	5	28	68	0	13	648	1669	91	3
D	525158	PBAF complex (Polybromo- and BAF containing complex)	196528;51412;55193;60;6597;6598;6599;6601;6602;6605;71;86	1835;426;1602;375;1679;385;1105;1214;515;411;375;429	0	20	1.5	38	8.5	125	6.5	82	472	10351	265	12
D	167200	glucocorticoid/glucocorticoid receptor/glucocorticoid/glucocorticoid receptor/hSWI/SNF	2908;4763;60;6597;6598;6599;6601;6602;6605;8289	778;2839;375;1679;385;1105;1214;515;411;2285	2	24	2	26	14	142	5.5	59	941.5	11586	251	10
D	523606	DAXX-Axin-p53-HIPK2 complex	1616;28996;7157;8312	752;1198;393;862	0.5	14	3.5	12	18.5	68	7	32	807	3205	126	4
D	522954	Emerin complex 32	10155;10284;1108;140836;2010;23186;29079;3065;4001;5933;5934;60;6598;6599;6601;6709;79718;84661;8841;90665;9111;8350	835;172;1912;90;254;482;270;482;586;1068;1139;375;385;1105;1214;2477;514;99;428;522;307;136	1	64	1	57	7	301	3	136	482	14852	558	22
D	133471	MYC/Max/MIZ-1/ZO2	4149;4609;7709;9414	160;454;803;1190	2.5	12	2.5	24	12	103	3	13	628.5	2607	152	4
D	526231	MAP2K5-PRKCI-SQSTM1 complex	5584;5607;8878	596;448;440	0	0	3	9	23	67	1	11	448	1484	87	3
D	533312	BRCA1 C complex	51720;580;5932;672	719;777;897;1884	0	2	0	0	14.5	89	2.5	22	837	4277	113	4
D	21618	Integrin alpha6:beta4:Plectin:BP180 complex	1308;3655;3691;5339	1497;1091;1822;4684	0	6	7.5	32	33.5	151	10	60	1659.5	9094	249	4
D	530319	NCOR1 complex	10155;10291;10847;23450;6597;6598;6599;6601;8841;9611	835;793;3230;1217;1679;385;1105;1214;428;2440	2	24	1.5	17	17	178	10	89	1159.5	13326	308	10
D	122124	mTORC1/PRAS40/DEPTOR/14-3-3 family	2475;57521;64223;64798;7531;84335	2549;1335;326;409;255;256	0	5	0.5	5	15.5	101	5	33	367.5	5130	144	6
D	523842	TRAP complex	10001;10025;29079;51003;5469;7067;84246;892;9282;9412;9440;9442;9862;9967;9968;9969	246;877;270;131;1581;490;135;283;1454;144;651;311;989;955;2177;2174	0	17	0	17	3.5	178	3.5	77	570.5	12868	289	16
D	521781	RNA pol II containing coactivator complex Tat-SF	1025;27336;4691;5430;6829	372;755;710;1970;1087	2	29	3	28	30	134	10	74	755	4894	265	5
D	533256	Polycomb repressive complex 1 (PRC1; hPRC-H)	1911;1912;22955;57332;6015;6045;648;80012;8467;84733;8535;3303	1004;858;660;389;406;336;326;995;1052;532;560;641	1	17	0	8	8.5	98	0.5	52	600.5	7759	175	12
D	127777	PYK2/Paxillin/CRK	1398;2185;5829	304;1009;591	0	0	8	27	27	68	0	2	591	1904	97	3
D	528178	NCOR-SIN3-RPD3 complex	23309;25942;3066;9612	1162;1273;582;2524	3.5	15	2.5	11	9.5	102	2.5	12	1217.5	5541	140	4
D	525997	BRCA1-RAD50-MRE11-NBS1 complex	10111;4361;4683;672	1312;708;754;1884	2	14	0.5	3	19	95	5	26	1033	4658	138	4
D	530074	Apoptosis- and splicing-associated protein complex (ASAP-L); SAP18-RNPS1-Acinus-L	10284;10921;22985	172;305;1341	1	3	2	5	12	102	4	13	305	1818	123	3
D	525413	MLL1-WDR5 complex	10445;11091;124944;125476;1876;26121;26168;27043;284058;3054;3308;4297;51230;54881;57680;5929;6045;6872;6874;6878;6879;6880;81887;84148;8607;8972;9070	534;334;192;228;281;499;574;1130;1105;2035;840;3969;1012;929;2302;538;336;1893;1085;677;349;264;734;467;456;1857;628	1	30	0	26	8	280	1	97	628	25248	433	27
D	524127	MDC1-MRE11-RAD50-NBS1 complex	10111;4361;4683;9656	1312;708;754;2089	3.5	18	0.5	3	19	157	4.5	25	1033	4863	203	4
D	524829	BASC (Ab C-20) complex (BRCA1-associated genome surveillance complex)	10111;2956;672	1312;1360;1884	2	5	1	2	25	82	14	36	1360	4556	125	3
D	529140	Kinase maturation complex 2	10010;11140;29110;3320;3326;64343;7186;9755	425;378;729;854;724;392;501;615	0.5	43	0.5	22	12.5	89	8	104	558	4618	258	8
D	124334	MRN complex/ATM/MDC1	10111;4361;4683;472;9656	1312;708;754;3056;2089	3	19	1	6	19	177	4	29	1312	7919	231	5
D	523086	EBAFa complex	4298;6597;6598;6599;6601;6602;6603;6605;8289;86	559;1679;385;1105;1214;515;531;411;2285;429	1	17	1	15	9.5	133	6.5	64	545	9113	229	10
D	125711	SKI/SIN3a/NCoR1/TIF1B/Myb	10155;25942;4602;6497;9611	835;1273;761;728;2440	3	18	3	12	14	106	2	35	835	6037	171	5
D	13500	53BP1:H2AX complex at site of double-strand break	3014;7158;9656	143;1977;2089	4	9	2	6	113	276	2	8	1977	4209	299	3
D	167655	METS/DP103/Sin3/HDAC2/5/NCOR2/SMRT/E2F-4/p107/p130	10014;11218;1874;2117;25942;5933;5934;9612	1123;824;413;512;1273;1068;1139;2524	1	16	1	11	18.5	194	0.5	7	1095.5	8876	228	8
D	114800	BRCA1/BARD1/p53	580;672;7157	777;1884;393	2	15	0	0	29	93	3	23	777	3054	131	3
D	121843	NPC/RanGAP1/SUMO1/Ubc9	23225;23636;5903;5905;7329;7341;8021;9972	1887;522;3224;587;158;101;2090;1475	1	10	1.5	20	10	238	4	59	1031	10044	327	8
D	119372	MRN complex/ATM/MDC1/H2AX/RNF8/53BP1/BRCA1/ABRA1	10111;3014;4361;4683;472;672;7158;84142;9025;9656	1312;143;708;754;3056;1884;1977;409;485;2089	1	24	0.5	12	19	399	3.5	46	1033	12817	481	10
D	132000	MAPK8IP1/MKK7/MAP3K11/JNK1	4296;5599;5609;9181;9479	847;427;419;986;711	0	2	0	5	35	119	1	7	711	3390	133	5
D	521934	BCOR complex	23429;3312;54880;6015;6045;6500;84678;84759	228;646;1755;406;336;163;1336;259	1	18	1	15	12.5	100	4.5	63	371	5129	196	8
D	117622	GIT1/betaPIX/PAK1	28964;5058;8874	770;553;803	0	3	5	15	23	68	1	3	770	2126	89	3
D	524635	Chromosomal passenger complex CPC (INCENP; CDCA8; BIRC5)	332;3619;55143	165;918;280	0	2	1	4	25	107	1	4	280	1363	117	3
D	172459	PML/sp100/DAXX	1616;5371;6672	752;882;885	1	3	1	6	27	81	6	15	882	2519	105	3
D	528233	RNA polymerase II complex (RPB1; RAP74; CDK8; CYCC; SRB7; BAF190; BAF47); chromatin structure modifying	1024;2962;5430;6595;6597;6598;892;9412	464;517;1970;1590;1679;385;283;144	0.5	16	0.5	18	15	138	3	58	490.5	7032	230	8
D	9681	3; end cleaved; ligated exon containing complex	10189;10250;10914;10921;11338;22916;29894;4116;4686;4799;51362;51692;53981;6426;6427;6428;6429;6430;6431;6432;65109;7307;8106;8683;9295;9785;9939	264;904;745;305;475;156;1443;146;790;1120;579;684;782;248;221;164;494;272;344;238;483;240;306;221;484;1227;174	1	27	1	51	10	405	2	75	344	13509	558	27
D	59711	Nek2A:MCC:APC/C complex	10393;11065;246184;29882;29945;4085;4751;51433;51434;51529;64682;701;7321;7324;8697;8881;9184;991;996	185;179;85;822;808;205;445;755;599;196;1944;1050;147;193;597;620;328;499;830	0	7	1	15	7	177	4	108	499	10487	307	19
D	527243	RICH1-PAR3-aPKC polarity complex	55114;5584;56288	881;596;1356	1	3	5	21	23	66	0	1	881	2833	91	3
D	524101	MDC1-MRN-ATM-FANCD2 complex	10111;2177;4361;4683;472;9656	1312;1471;708;754;3056;2089	2	19	1.5	8	19.5	198	5.5	42	1391.5	9390	267	6
D	4397	cell cycle proteins:phospho-APC/C:Cdh1 complex	10393;246184;29882;29945;51343;51433;51434;51529;5347;64682;7321;7324;8697;8881;996	185;85;822;808;496;755;599;196;603;1944;147;193;597;620;830	0	5	1	13	8	162	4	83	599	8880	263	15
D	531171	BRCA1-RNA polymerase II complex	2068;2071;2959;2960;2961;2962;2963;2965;2966;2967;2968;5430;5431;5432;5433;5434;5435;5436;5437;5438;5439;5440;5441;672;6908;9412	760;782;316;439;291;517;249;548;395;308;462;1970;1174;275;142;210;127;172;150;125;117;58;67;1884;339;144	0	11	0.5	32	0.5	151	3	139	299.5	12021	333	26
D	32768	TAP:3;-polyadenylated; capped mRNA complex	10189;10250;10482;10921;11338;22916;4116;4686;4799;51362;6426;6427;6428;6429;6430;6431;6432;65109;7307;8683;9295;9785;9939	264;904;619;305;475;156;146;790;1120;579;248;221;164;494;272;344;238;483;240;221;484;1227;174	1	22	1	46	11	375	2	43	305	10168	486	23
D	170947	RXR/VDR/WSTF/WINAC	10036;11198;6256;6597;6599;6601;6602;6605;7155;7421;8289;86;9031	956;1047;462;1679;1105;1214;515;411;1621;427;2285;429;1483	1	30	1	26	13	223	6	111	1047	13634	390	13
D	21607	Integrin alpha 6:beta 4:Plectin complex	3655;3691;5339	1091;1822;4684	0	6	11	28	47	139	15	58	1822	7597	231	3
D	794428	Fl-BAF57	10419;29117;55193;57492;5977;60;6595;6597;6598;6599;6601;6602;6603;6605;79084;8289;86;9274	637;651;1602;2231;391;375;1590;1679;385;1105;1214;515;531;411;342;2285;429;217	0.5	33	2	45	9	196	4.5	99	584	16590	373	18
D	206441	TSC1:TSC2 complex:mTORC2	2475;253260;64223;7248;7249;79109	2549;1708;326;1164;1807;522	0	2	2	13	21.5	147	3	22	1436	8076	184	6
D	63746	Chromosome passenger complex	332;3619;55143;9212	165;918;280;344	0	2	1.5	6	18	118	2	14	312	1707	140	4
D	167189	hSWI/SNF	60;6597;6598;6599;6601;6602;6605;8289	375;1679;385;1105;1214;515;411;2285	2	19	2	23	12	109	8	58	810	7969	209	8
D	172291	Importin-alpha/Importin-beta/NuMA/Tpx2	22974;3837;3838;4926	747;876;529;2115	2	10	3	10	24	120	8.5	37	811.5	4267	177	4
D	530080	mTORC2 complex (mTOR/FRAP1; LST8; mAVO3/RICTOR)	2475;253260;64223	2549;1708;326	1	2	2	8	31	96	4	15	1708	4583	121	3
D	531853	NUMAC complex (nucleosomal methylation activator complex)	10498;57410;60;6597;6598;6599;6601;6602;6605;8289	608;808;375;1679;385;1105;1214;515;411;2285	0.5	19	1.5	23	8.5	116	5.5	60	708	9385	218	10
D	523452	ITGA4-PXN-GIT1 complex	28964;3676;5829	770;1032;591	0	0	8	18	34	73	0	2	770	2393	93	3
D	794128	Suv39h1	10155;10919;10951;11335;23468;55729;79813;9869	835;1210;185;183;191;1270;1298;1291	3	23	0.5	8	11.5	133	5.5	62	1022.5	6463	226	8
D	6871	Mcm10:pre-replicative complex	23594;23595;4171;4172;4173;4174;4175;4176;4998;4999;5000;5001;55388;81620;84515;990	252;712;904;808;863;734;821;719;861;577;436;435;875;546;840;560	0	16	1	20	5.5	134	6	120	726.5	10943	290	16
D	202756	ECM proteins:Integrin alpha:Integrin beta	11081;1277;1278;1280;1281;1282;1284;1285;1286;1287;1288;1289;1290;1291;1292;1294;1295;1296;1297;1298;1299;1300;1301;1302;1303;1306;1307;1310;1462;1463;1634;176;2006;2239;22801;2335;2817;3339;3371;3655;3672;3673;3674;3675;3676;3678;3679;3680;3681;3682;3683;3684;3685;3687;3688;3689;3690;3691;3693;3694;3695;3696;375790;3914;3918;4060;633;6382;63827;6383;6385;7148;80781;8515;8516;9126;960;9672	352;1464;1366;1487;1466;1669;1712;1670;1690;1691;1691;1838;1499;1028;1019;2944;744;703;921;689;684;680;1818;1736;3063;1388;1604;1142;3396;1321;359;2530;724;556;1188;2477;558;4391;2201;1091;1179;1181;1039;1051;1032;1049;1141;1035;1161;1179;1170;1152;1048;1163;801;769;788;1822;799;788;798;769;2045;1172;1193;338;368;310;911;201;198;4242;1751;1167;1063;1217;742;442	0	17	0	74	0.5	189	0	106	1156.5	100824	386	78
D	114975	Axin1/APC//beta catenin	1499;324;8312	781;2843;862	0	3	6	20	22	98	0	13	862	4486	134	3
D	124295	MRN complex/ATM/MDC1/H2AX/RNF8	10111;3014;4361;4683;472;9025;9656	1312;143;708;754;3056;485;2089	3	23	1	8	19	185	4	35	754	8547	251	7
D	793975	NSC	2475;253260;57521;64223	2549;1708;1335;326	0.5	2	2	10	30	125	6.5	24	1521.5	5918	161	4
D	524079	BRCA1-BARD1-POLR2A complex	5430;580;672	1970;777;1884	2	4	0	12	45	109	3	39	1884	4631	164	3
D	4719	TORC2 complex	2475;253260;64223;79109	2549;1708;326;522	0.5	2	1	8	17.5	100	2.5	15	1115	5105	125	4
D	796019	Fl-Brg1	10419;6597;6598;6599;6601;6602;6605;8289;86;9321	637;1679;385;1105;1214;515;411;2285;429;1979	1	16	2	23	8.5	110	6.5	66	871	10639	215	10
D	521423	RNA polymerase II holoenzyme complex	2068;2071;2959;2960;2961;2962;2963;2965;2966;2967;2968;5430;5431;5432;5433;5434;5435;5436;5437;5438;5439;5440;5441;6908	760;782;316;439;291;517;249;548;395;308;462;1970;1174;275;142;210;127;172;150;125;117;58;67;339	0	11	1	32	0.5	100	3	135	299.5	9993	278	24
D	527224	RB1-HDAC1-BRG1 complex	3065;5925;6597	482;928;1679	7	19	2	9	27	62	8	19	928	3089	109	3
D	794463	Fl-BAF45	10419;196528;29117;55193;57492;5977;60;6595;6597;6598;6599;6601;6602;6603;6605;79084;8289;86;9275	637;1835;651;1602;2231;391;375;1590;1679;385;1105;1214;515;531;411;342;2285;429;202	0	33	2	45	8	201	4	103	637	18410	382	19
D	45022	phospho-(Ser45; Thr41; Ser37) beta-catenin:Axin;GSK3:CK1alpha:APC:PP2A complex	1452;1499;2932;324;5515;5518;5528;8312	365;781;433;2843;309;589;602;862	0.5	7	2.5	29	11.5	142	6.5	57	595.5	6784	235	8
D	533422	YY1-MDM2-p53 complex	4193;7157;7528	497;393;414	1	14	2	5	29	75	7	29	414	1304	123	3
D	533319	BRCA1 A complex	51720;580;672;84142	719;777;1884;409	0	2	0	0	14.5	87	5	29	748	3789	118	4
D	170477	NuMA/Tpx2/Hklp2	22974;4926;56992	747;2115;1388	2	8	3	7	38	109	5	12	1388	4250	136	3
D	524835	BASC (Ab 80) complex (BRCA1-associated genome surveillance complex)	2956;4292;4436;5981;5982;5984;641;672	1360;756;934;1147;354;363;1417;1884	2	12	0.5	7	14.5	153	5	50	1040.5	8215	222	8
D	131904	SKI/SIN3a/NCoR1/TIF1B	10155;25942;6497;9611	835;1273;728;2440	3.5	15	3.5	12	27.5	103	3	35	1054	5276	165	4
D	126635	MAP1B/LIS1/Dynein heavy chain	1778;4131;5048	4646;2468;410	6	14	5	44	19	144	4	46	2468	7524	248	3
D	205635	Axin:APC:beta-catenin:GSK-3	1499;2932;324;8312;8313	781;433;2843;862;843	0	6	4	25	19	122	0	14	843	5762	167	5
D	13511	BRCA1:53BP1 complex at site of DNA double-strand break	3014;672;7158;9656	143;1884;1977;2089	2.5	9	1	6	82	327	2.5	11	1930.5	6093	353	4
D	32713	post exon ligation complex	22916;2962;2963;4686;5430;5431;5432;5433;5434;5435;5436;5437;5438;5439;5440;5441;6426;6427;6431;6432	156;517;249;790;1970;1174;275;142;210;127;172;150;125;117;58;67;248;221;344;238	0.5	18	1	33	1.5	166	2	112	215.5	7350	329	20
D	115782	Axin1/APC/GSK3/beta catenin	1499;2931;324;8312	781;483;2843;862	0	3	5	24	21.5	119	1	15	821.5	4969	161	4
D	132099	Condensin I complex	10051;10592;23397;64151;9918	1288;1197;741;1015;1401	1	15	1	7	20	89	7	47	1197	5642	158	5
D	530046	NuMA-LGN-G-alpha-i-1 complex	2770;29899;4926	354;684;2115	0	5	4	8	31	98	7	16	684	3153	127	3
D	524388	MRIP-MBS-RHOA complex	23164;387;4659	1038;193;1030	0	0	3	18	29	70	3	8	1030	2261	96	3
D	126583	NPC	23225;23636;5903;8021;9972	1887;522;3224;2090;1475	1	7	3	19	51	225	7	48	1887	9198	299	5
D	532000	CHUK-NFKB2-REL-IKBKG-SPAG9-NFKB1-NFKBIE-COPB2-TNIP1-NFKBIA-RELA-TNIP2 complex	10318;1147;4790;4791;4792;4794;5966;5970;79155;8517;9043;9276	636;745;969;900;317;500;619;551;429;487;1321;906	0	13	1.5	17	8.5	132	2	36	627.5	8380	198	12
D	794497	DPF3	57492;60;6595;6597;6598;6599;6601;6602;6603;6604;6605;8110;8289;86	2231;375;1590;1679;385;1105;1214;515;531;483;411;357;2285;429	1	32	1.5	30	7.5	150	5.5	83	523	13590	295	14
D	794812	PBAF	196528;203068;55193;60;6597;6598;6599;6601;6602;6604;6605;86	1835;444;1602;375;1679;385;1105;1214;515;483;411;429	0	18	1.5	34	9.5	134	6.5	82	499	10477	268	12
D	126706	alpha4/beta1 Integrin/Fibronectin/Paxillin/GIT1	2335;28964;5829	2477;770;591	0	0	8	19	34	75	0	1	770	3838	95	3
D	526058	ASF1-interacting protein complex	10036;25842;55723;7290;8208;8350	956;204;202;1017;559;136	0	9	0.5	4	13	89	2	21	381.5	3074	123	6
D	200142	GPCR ligand:GPCR	10220;10683;10718;1081;11211;134;135;136;1392;140;1437;1440;1442;1443;145957;151449;1622;1812;1813;1814;1815;1816;182;183;1839;185;186;1906;1907;1908;1950;200081;2056;2069;2246;2247;2248;2249;2250;2251;2252;2253;2254;2255;2256;2258;2259;2277;2488;2520;2535;26281;26291;2641;2658;2660;2661;2662;2668;2688;2691;2695;27006;27302;2796;28514;2911;2912;2913;2914;2915;2916;2917;2918;2922;3082;3084;3439;34…	407;618;696;116;581;326;412;332;196;318;144;207;256;217;115;450;104;446;443;400;419;477;1218;485;208;359;363;212;178;238;1207;546;193;169;155;288;239;206;268;208;194;244;208;208;225;255;252;354;129;101;565;211;209;180;429;375;454;478;228;217;108;153;170;424;92;723;1194;872;879;912;1212;877;922;908;148;728;645;189;188;189;189;189;189;189;189;190;189;189;189;189;187;166;195;153;236;411;271;269;281;…	0	23	0	42	0	137	0	20	261	76289	222	225
D	528813	BIRC5-AURKB-INCENP-EVI5 complex	332;3619;7813;9212	165;918;810;344	0	2	1	5	10.5	103	1.5	13	577	2237	123	4
D	524754	BAF complex	6595;6597;6598;6599;6601;6602;6605;8289;86	1590;1679;385;1105;1214;515;411;2285;429	1	24	2	16	13	123	6	59	1105	9613	222	9
D	21654	BP230:BP180:Plectin:integrin alpha 6 beta 4:Laminin 332	1308;3655;3691;3909;3914;3918;5339;667	1497;1091;1822;3333;1172;1193;4684;5171	0	8	3.5	41	16	178	3.5	68	1659.5	19963	295	8
D	524971	SWI-SNF chromatin remodeling-related-BRCA1 complex	57492;6595;6597;6598;6599;6601;6603;6605;672;8289;86	2231;1590;1679;385;1105;1214;531;411;1884;2285;429	1	27	2	19	13	185	6	70	1214	13744	301	11
D	18537	ADP:Calcium Bound Sarcomere Protein Complex	1674;1756;4606;4624;4625;4632;4703;7111;7125;7135;7138;7170;7273;7431;8557;89	470;3685;1141;1939;1935;194;6669;359;160;187;278;285;32767;466;167;901	1	35	1	87	1.5	128	0	28	468	51603	278	16
D	171454	TF2A/TAFs/TBP/TF2F/TF2H/RNA Pol II/TF2E	2908;2957;2960;2962;2971;5430	778;376;439;517;365;1970	1.5	11	0	17	12	106	0	37	478	4445	171	6
D	794310	TRAP/SMCC	10001;10025;1024;29079;400569;51003;5469;54797;84246;892;90390;9282;9412;9439;9440;9442;9443;9477;9862;9967;9968;9969	246;877;464;270;117;131;1581;208;135;283;178;1454;144;1368;651;311;233;212;989;955;2177;2174	0	17	0	17	1.5	186	2.5	84	297	15158	304	22
D	4274	Cdc20:phospho-APC/C:Cyclin B:Cdc2 complex	10393;11065;246184;29882;29945;51433;51434;51529;64682;7321;7324;8697;8881;891;983;991;996	185;179;85;822;808;755;599;196;1944;147;193;597;620;433;297;499;830	0	8	1	18	8	160	4	110	499	9189	296	17
D	525062	MSH2/6-BLM-p53-RAD51 complex	2956;4436;5888;641;7157	1360;934;340;1417;393	2	20	1	4	25	98	8	48	934	4444	170	5
D	119386	MRN complex/ATM/MDC1/H2AX/RNF8/53BP1/BRCA1/ABRA1/RAP80	10111;3014;4361;4683;472;51720;672;7158;84142;9025;9656	1312;143;708;754;3056;719;1884;1977;409;485;2089	1	24	0	12	19	415	4	63	754	13536	514	11
D	118173	EGFR/EGFR/EGF/EGF/FAK	1950;1956;5747	1207;1210;1074	0	3	16	33	30	63	0	17	1207	3491	116	3
D	2619	RNA Polymerase II (unphosphorylated):TFIIF complex	2962;2963;5430;5431;5432;5433;5434;5435;5436;5437;5438;5439;5440;5441	517;249;1970;1174;275;142;210;127;172;150;125;117;58;67	0	8	0.5	21	0.5	84	3	99	161	5353	212	14
D	237500	GSK3B forms a complex with CTNNB1 and APC	1499;2932;324	781;433;2843	0	3	6	19	22	106	0	13	781	4057	141	3
D	171204	PML/sp100/RB	5371;5925;6672	882;928;885	2	9	1	7	28	84	2	11	885	2695	111	3
D	32805	Export Receptor bound mature mRNA Complex	10189;10250;10482;10921;22916;4116;4686;4799;65109;9939	264;904;619;305;156;146;790;1120;483;174	1	9	1.5	18	6	176	1.5	19	394	4961	222	10
D	204673	R-smad:smad4 complex:Corepressor:Deacetylase: responsive element	10013;10014;3065;3066;4086;4087;4088;4089;4090;4093;51564;55869;6497;6498;7088;7089;7090;7091;8841;9734;9759	1215;1123;482;582;465;467;425;552;465;467;991;377;728;684;770;743;772;773;428;1069;1084	1	31	0	9	6	173	1	40	684	14662	253	21
D	524803	EBAFb complex	4298;57492;6597;6598;6599;6601;6602;6603;6605;86	559;2231;1679;385;1105;1214;515;531;411;429	1	15	1	14	7.5	113	6.5	64	545	9059	206	10
D	522674	Splicing-associated factors complex	10189;10250;10921;7913;9939	264;904;305;375;174	1	3	2	9	12	174	2	14	305	2022	200	5
D	190083	GSK3B;AXIN1;APC	2932;324;8312	433;2843;862	0	0	4	13	19	95	0	0	862	4138	108	3
D	533486	BRCA1-BARD1-BACH1-DNA damage complex I	11073;2956;4292;571;580;672	1522;1360;756;736;777;1884	0.5	5	1	4	17	119	2	26	1068.5	7035	154	6
D	243051	MAP3K11(MLK3) forms a complex with MAPK8IP1(JIP1) and APP	351;4296;9479	770;847;711	0	0	0	4	35	77	0	2	770	2328	83	3
D	795792	BCOR	23429;3308;54880;6015;6045;6500;84678;84759	228;840;1755;406;336;163;1336;259	1	9	1	14	11.5	89	4.5	54	371	5323	166	8
D	21670	CD151:BP230:BP180:Plectin:Integrin alpha 6 beta 4: Laminin	1308;3655;3691;3909;3914;3918;5339;667;977	1497;1091;1822;3333;1172;1193;4684;5171;253	0	8	3	41	12	178	4	72	1497	20216	299	9
D	530037	PTIP-DNA damage response complex	10111;22976;4361;4683;641;7158	1312;1069;708;754;1417;1977	2	19	1	8	19	241	1.5	24	1190.5	7237	292	6
D	65095	integrin:cytoskeletal ahesion complex	10174;10580;3672;3693;5829;7094;7414	671;1292;1179;799;591;2541;1134	1	8	4	30	16	101	0	18	1134	8207	157	7
D	527059	MDC1-p53BP1-SMC1 complex	7158;8243;9656	1977;1233;2089	4	10	3	7	113	280	2	23	1977	5299	320	3
D	44939	SCF-beta-TrCP1 complex associated with phosphorylated beta-catenin	1452;1499;2932;324;5515;5518;5528;6500;8312;8454;8945	365;781;433;2843;309;589;602;163;862;776;605	0	8	2	30	10	145	5	70	602	8328	253	11
D	794851	BAF	60;6595;6597;6598;6599;6601;6602;6605;8289;86	375;1590;1679;385;1105;1214;515;411;2285;429	2	29	2	27	12	134	6.5	69	810	9988	259	10
D	532029	NPC subcomplex (NUP98; NUP107; NUP133; NUP160)	23279;4928;55746;57122	1436;1800;1156;925	0.5	2	1	4	18.5	79	9.5	37	1296	5317	122	4
D	521536	BRCA1-core RNA polymerase II complex	5430;5431;5432;5433;5434;5435;5436;5437;5438;5439;5440;5441;672	1970;1174;275;142;210;127;172;150;125;117;58;67;1884	0	4	0	19	0	101	3	93	150	6471	217	13
D	533589	NUMB-TP53-MDM2 complex	4193;7157;8650	497;393;651	0	13	1	4	29	82	7	26	497	1541	125	3
D	529420	SRm160/300 complex	10250;23524;6434;6625;6627	904;2752;288;437;255	2	9	2	23	33	640	5	20	437	4636	692	5
D	130393	Axin2/APC/GSK3/beta catenin	1499;2931;324;8313	781;483;2843;843	1.5	6	5	22	21.5	113	1.5	16	812	4950	157	4
D	30879	PPARG:RXRA:fatty acid:Mediator:Coactivator Complex	10001;10025;1024;10499;10891;112950;1387;2033;219541;23097;23389;29079;400569;51003;51586;5468;5469;54797;55090;55588;6256;6837;81857;8202;84246;85441;8648;892;90390;9282;9412;9439;9440;9441;9442;9443;9477;9862;9968;9969	246;877;464;1464;798;301;2442;2414;194;502;2210;270;117;131;788;505;1581;208;146;221;462;200;747;1424;135;2649;1441;283;178;1454;144;1368;651;600;311;233;212;989;2177;2174	0	119	0	30	2	290	1	95	503.5	33711	534	40
D	9634	Ligated exon containing complex	10189;10250;10914;10921;10978;11051;11338;1477;1478;1479;22916;29894;4116;4686;4799;51362;51585;51692;53981;6426;6427;6428;6429;6430;6431;6432;65109;7307;79869;8106;8683;9295;9785;9939	264;904;745;305;425;227;475;431;577;717;156;1443;146;790;1120;579;1555;684;782;248;221;164;494;272;344;238;483;240;514;306;221;484;1227;174	1	32	1	60	9.5	471	2	92	453	17955	655	34
D	126591	NPC/RanGAP1/SUMO1	23225;23636;5903;5905;7341;8021;9972	1887;522;3224;587;101;2090;1475	1	9	2	20	11	237	4	55	1475	9886	321	7
D	7776	Cdc2:Cyclin A:MCC:APC/C complex	10393;11065;246184;29882;29945;4085;51433;51434;51529;64682;701;7321;7324;8697;8881;8900;9184;983;991;996	185;179;85;822;808;205;755;599;196;1944;1050;147;193;597;620;465;328;297;499;830	0	9	1	21	5.5	172	4	119	482	10804	321	20
D	524073	ARF-Mule complex	10075;1029;4869	4374;156;294	3	16	2	5	24	87	13	55	294	4824	163	3
D	168647	PML/sp100/SUMO1/p53	5371;6672;7157;7341	882;885;393;101	1.5	16	0	1	27.5	87	5	30	637.5	2261	134	4
D	530718	Actin-ribonucleoprotein complex (POLR2A; GTF2F1; HNRNPU)	2962;3192;5430	517;825;1970	2	17	8	20	32	92	19	56	825	3312	185	3
D	524217	PXN-ITGB5-PTK2 complex	3693;5747;5829	799;1074;591	0	1	8	26	30	68	0	1	799	2464	96	3
NA	521867	PPP4C-PPP4R2-Gemin3-Gemin4 complex	11218;151987;50628;5531	824;417;1058;307	0	1	0	1	3.5	27	2	10	620.5	2606	39	4
NA	1801	spherical HDL:apoC-II:apoC-III:apoE	335;344;345;348	267;101;99;317	0	0	0	0	1.5	9	0	0	184	784	9	4
NA	185598	SKP1A;CUL1;RBX1;SKP2	6500;6502;8454;9978	163;424;776;108	0	1	0	0	2	12	3.5	16	293.5	1471	29	4
NA	65602	Exon Junction:UPF2:UPF3 Complex	10921;22794;26019;4116;65110;9775;9939	305;703;1272;146;476;411;174	0	5	2	11	4	36	1	18	411	3487	70	7
NA	532104	AP3-BLOC1 complex	10239;10947;1176;23557;26258;2647;26985;282991;388552;55330;63915;8120;84062;8546;8943	193;418;193;136;172;125;418;142;202;217;187;1082;351;1094;1153	0	6	0	6	1	41	0	19	202	6083	72	15
NA	38911	Sema4D:pPlexin-B1:Met:Rnd1	10507;27289;4233;5364	862;232;1408;2135	0	0	1	13	1.5	17	0	10	1135	4637	40	4
NA	117483	FA complex	2175;2176;2178;2188;2189;55120;7415	1455;558;536;374;622;380;806	0	20	0	9	3	63	2	48	558	4731	140	7
NA	533525	LSm2-8 complex	11157;23658;25804;27258;51690;51691;57819	80;91;139;102;103;96;95	0	1	0	1	0	3	1	7	96	706	12	7
NA	121008	IL6/IL6RA/gp130 (dimer)/JAK1/JAK1/LMO4/Hck	3055;3569;3570;3572;3716;8543	526;212;468;918;1154;165	0	0	2	18	2.5	23	0	7	497	3443	48	6
NA	29106	pFAK (391) bound to NCAM1:pFyn	2534;4684;5747;5786;64601;6708;6712	537;858;1074;802;839;2419;2390	0	2	5	42	5	54	0	8	858	8919	106	7
NA	120924	Ephrin B/EPHB1/Src	1949;2047;6714	340;984;536	0	0	7	16	4	15	0	0	536	1860	31	3
NA	47574	GRIK 2 homomer	1739;1741;1742;2898;83988;805	926;817;767;908;193;149	0	5	3	23	4	33	0.5	9	792	3760	70	6
NA	48818	Ub-ERBB4:WWP1/ITCH	11059;2066;6233;7311;7314;7316	922;1308;156;128;229;685	3	18	1	26	3.5	19	8	40	457	3428	103	6
NA	123759	Insulin Receptor/Insulin/GRB14/PDK1	2888;3630;3643;5170;723961	540;110;1382;556;200	0	2	1	18	2	34	0	4	540	2788	58	5
NA	528970	SMN complex (GEMIN5;2;3;4; SMN)	11218;25929;50628;8487;6606	824;1508;1058;280;294	0	1	1	7	10	47	1	10	824	3964	65	5
NA	124908	alphav/beta3 Integrin/Del1	10085;3685;3690	480;1048;788	0	0	2	6	3	7	1	8	788	2316	21	3
NA	130028	IFN-gamma/IFN-gammaR/JAK1/JAK1/JAK2/JAK2 /TCPTP	3458;3459;3716;3717;5771	166;489;1154;1132;415	0	2	4	25	3	14	1	9	489	3356	50	5
NA	203971	NICD:Deltex	113878;1840;196403;4851;4853;4854;4855	622;620;347;2555;2471;2321;2003	0	3	0	2	1	28	0	3	2003	10939	36	7
NA	526107	ERBB2-MEMO-SHC complex	2064;51072;6464	1255;297;584	0	0	3	16	6	19	3	11	584	2136	46	3
NA	235926	IRF1 and IRF2 complex with the TNFSF10 promoter	3659;3660;8743	325;349;281	0	5	1	2	0	3	0	0	325	955	10	3
NA	114467	TCF4/beta catenin/TNIK	1499;23043;6934	781;1360;596	2	5	6	16	22	63	3	17	781	2737	101	3
NA	532851	IL4-IL4R-IL2RG complex	3561;3565;3566	369;153;825	0	0	4	9	1	3	1	3	369	1347	15	3
NA	169553	48S/S6	1973;1977;1981;26986;5704	406;248;1599;636;418	4	18	2	15	4	44	11	58	418	3307	135	5
NA	805247	PPP3.complex	116143;5530;5534	357;521;170	0	0	0	1	1	3	3	8	357	1048	12	3
NA	49197	Integrin alpha1beta1:Type IV collagen:Mg++	1285;1286;1287;3672;3688	1670;1690;1691;1179;801	0	0	0	6	3	12	1	9	1670	7031	27	5
NA	529101	MTA1 complex	3065;3066;53615;5928;5931;9112	482;582;291;425;425;715	2	19	0.5	3	6.5	42	5.5	29	453.5	2920	93	6
NA	16084	chylomicron	335;336;337;338;344;345;348	267;100;396;4563;101;99;317	0	1	0	3	3	20	0	2	267	5843	26	7
NA	531968	TIF1gamma-SMAD2-SMAD3 complex	4087;4088;51592	467;425;1127	4	12	0	1	10	33	0	1	467	2019	47	3
NA	54375	IL3:IL3R active complex; inactive JAK2; phosphorylated Bc:SHC1	1439;3562;3563;3717;6464	897;152;378;1132;584	0	0	3	26	1	9	0	1	584	3143	36	5
NA	132964	alpha1/beta1 Integrin/Type V Collagen	1289;1290;3672;3688	1838;1499;1179;801	0	2	0	4	0.5	5	0.5	8	1339	5317	19	4
NA	204806	TLR4:MyD88:IRAK-4:Tollip	4615;51135;54472;7099	309;460;274;839	0	2	1	5	1.5	14	0.5	6	384.5	1882	27	4
NA	528699	TIP5-DNMT-HDAC1 complex	11176;1786;1789;3065	1905;1632;853;482	4	17	1	6	13.5	51	5.5	27	1242.5	4872	101	4
NA	530692	SMARCA2/BRM-BAF57-MECP2 complex	4204;6595;6605	498;1590;411	1	11	3	8	11	41	5	13	498	2499	73	3
NA	38107	eNOS:CaM:HSP90:p-AKT1	207;3320;4846;805	480;854;1203;149	2	28	3.5	19	8.5	38	4	41	667	2686	126	4
NA	28629	Cul5-SCF complex	6921;6923;8065;9978	112;161;780;108	0	1	0.5	2	1	6	2	8	136.5	1161	17	4
NA	534038	EIF3 complex (EIF3B; EIF3J; EIF3I)	8662;8668;8669	814;325;258	1	8	2	9	5	21	12	37	325	1397	75	3
NA	119993	alphav/beta3 Integrin/Necl-5	3685;3690;5817	1048;788;417	0	0	2	5	3	7	1	8	788	2253	20	3
NA	522332	RalBP1-CDC2-CCNB1 complex	10928;891;983	655;433;297	1	3	1	8	10	42	3	22	433	1385	75	3
NA	131520	IL6/IL6RA/gp130 (dimer)/TYK2/TYK2/LMO4	3569;3570;3572;7297;8543	212;468;918;1187;165	0	0	0	14	1	15	0	1	468	2950	30	5
NA	125414	NEDD8/UBC12/UBA3	4738;9039;9040	81;463;183	1	2	1	2	2	4	8	24	183	727	32	3
NA	129863	alpha6/beta1 Integrin/Laminin 4	3655;3688;3908;3913;3915	1091;801;3122;1798;1609	0	1	1	7	4	28	4	21	1609	8421	57	5
NA	47913	insulin:insulin receptor	3630;3643;723961	110;1382;200	0	1	0	11	0	17	0	3	200	1692	32	3
NA	525386	RNA-induced silencing complex; RISC	23405;27161;6895	1922;859;366	0	0	0	4	1	8	1	5	859	3147	17	3
NA	36513	Empty Acetylcholine Synaptic Vesicle	5864;6572;6844;6857	220;532;116;422	0	1	0	4	2.5	9	1.5	7	321	1290	21	4
NA	795286	emerin C25	10146;11140;2010;23450;3190;51691;56647;57819;6632;6741;7529;7531;9406	466;378;254;1217;464;96;322;95;119;408;246;255;330	1	23	1	43	6	98	5	79	322	4650	243	13
NA	17814	Ligand interacting with NKG2D	10870;135250;22914	92;263;216	0	0	0	1	0	0	0	0	216	571	1	3
NA	116980	SMAD2/SMAD2/SMAD4/FOXH1/NKX2-5	1482;4087;4089;8928	324;467;552;365	2	9	0	1	3	20	0	3	416	1708	33	4
NA	41570	p75NTR:NgR:LINGO1:myelin component	4804;57142;84894	427;1192;620	0	1	1	7	4	26	0	8	620	2239	42	3
NA	804015	PP4-(III).complex	151987;5531;57223	417;307;849	0	1	0	2	3	9	1	4	417	1573	16	3
NA	131120	RELN/VLDLR/DAB1/LIS1/PAFAH1B2/PAFAH1B3	1600;5048;5049;5050;5649;7436	555;410;229;231;3460;873	0	2	1	9	1	6	0.5	7	482.5	5758	24	6
NA	524273	RAB9-TIP47-MPRI complex	10226;3482;9367	434;2491;201	1	2	1	6	10	23	1	6	434	3126	37	3
NA	171562	WAVE1-3/Nap/PIR/Abl2/HSPC	10163;10787;27;5688;8544	498;1134;1182;248;290	0	1	2	21	11	69	2	19	498	3352	110	5
NA	124161	Gq family/GDP/Gbeta gamma	2776;2782;54331	359;340;71	0	1	0	0	1	3	2	6	340	770	10	3
NA	61508	GABA Loaded synaptic vesicle	140679;2571;2572;3312;5864;6844;6857;80331	525;594;585;646;220;116;422;198	0	16	0	14	3.5	41	1.5	51	473.5	3306	122	8
NA	129790	T-DHT/AR/PELP1/Src/PI3K	27043;367;5290;5295;6714	1130;920;1068;724;536	0	4	7	33	11	48	0	3	920	4378	88	5
NA	124119	HSP60/TLR2/TLR1	3329;7096;7097	573;786;784	0	23	0	3	0	5	0	19	784	2143	50	3
NA	192760	NFATC1;NFATC2;RELA	4772;4773;5970	930;925;551	0	7	1	3	10	54	0	0	925	2406	64	3
NA	127365	TERT/NF kappa B1/14-3-3	4790;7015;7531	969;1132;255	3	7	1	4	6	26	5	18	969	2356	55	3
NA	4993	Centromeric Chromatin:CENPH-I: Mis18 Complex	11339;23421;2491;401541;54069;55166;55320;55839;57082;5928;5931;64105;64946;79172;79682	229;177;756;288;233;268;1132;353;2342;425;425;269;247;300;418	0	6	0	6	4	112	2	52	300	7862	176	15
NA	171570	NCK/PIR/Abl2/Nap	10787;27;4690;8544	1134;1182;377;290	0	0	2.5	20	9	57	0	8	755.5	2983	85	4
NA	129354	alpha2/beta1 Integrin/Tenascin C	3371;3673;3688	2201;1181;801	0	0	0	4	4	14	2	9	1181	4183	27	3
NA	527007	CD98-LAT2-ITGB1 complex	23428;3688;6520;8140	535;801;661;507	0	0	0	4	4	20	5	28	598	2504	52	4
NA	200714	Cos2:Fu:Ci:PKA:GSK3:CKI	5566;5567;5568	351;398;351	1	2	2	5	5	16	6	14	351	1100	37	3
NA	531080	SAP complex (Sin3-associated protein complex)	25942;3065;3066;51742;5928;5931;79595;8819	1273;482;582;1312;425;425;1048;220	2	23	1	8	6.5	81	3	27	532	5767	139	8
NA	118848	alpha5/beta1 Integrin/Fibrillin-1	2200;3678;3688	2871;1049;801	0	0	1	5	4	11	2	9	1049	4721	25	3
NA	12391	DNA containing unligated replacement-synthesized patch	10714;328;5424;5425;57804	466;318;1107;469;107	1	13	1	7	2	20	4	24	466	2467	64	5
NA	126214	DCC/NCK1/netrin 1	1630;4690;9423	1447;377;604	0	0	2	6	3	10	0	0	604	2428	16	3
NA	168241	FA complex	2175;2176;2178;2188;2189;7415	1455;558;536;374;622;806	0	20	0	9	4	63	2.5	46	590	4351	138	6
NA	129517	RXRs/RARs/NRIP1/9cRA/HDAC3	5916;6258;8204;8841	454;463;1158;428	0	8	0.5	2	2	15	0.5	4	458.5	2503	29	4
NA	117133	alpha2/beta1 Integrin/Type II Collagen	1280;3673;3688	1487;1181;801	0	0	0	4	3	7	2	9	1181	3469	20	3
NA	64702	C1Q	712;713;714	245;253;245	0	0	0	0	0	0	0	0	245	743	0	3
NA	130240	Monovalent TCR/CD3	915;916;917;919	171;207;182;164	0	0	2	13	1.5	6	0	0	176.5	724	19	4
NA	119057	EGFR/EGFR/EGF/EGF/GRB2/GAB1/RasGAP	1950;1956;2549;2885;5921	1207;1210;724;217;1047	0	7	5	40	1	49	0	23	1047	4405	119	5
NA	126829	BMP2-4/BMPR2/BMPR1A-1B/RGM/XIAP	331;56963;650;658;659	497;458;396;502;1038	0	0	0	4	0	14	0	7	497	2891	25	5
NA	238973	BIRC4 forms a complex with BIRC6 and DIABLO	331;56616;57448	497;239;4857	0	0	1	5	2	17	7	24	497	5593	46	3
NA	202296	JAK2:IL-3R:JAK1	1439;3563;3716;3717	897;378;1154;1132	0	0	6	27	1.5	9	0	5	1014.5	3561	41	4
NA	28649	multi-ubiquitinated APOBEC3G:Vif:Cul5:SCF complex	200316;60489;6233;6921;6923;7311;7314;7316;8065;9978	373;384;156;112;161;128;229;685;780;108	0.5	17	1	6	2	22	2.5	45	195	3116	90	10
NA	525698	TFIIH transcription factor complex	1022;2068;2071;2965;2966;2967;2968;404672;4331;902	346;760;782;548;395;308;462;71;309;323	0	0	0	4	1.5	23	3.5	32	370.5	4304	59	10
NA	130411	CDC42/GTP/IRSP53/Eps8	10458;2059;998	552;822;191	0	2	8	20	16	38	6	15	552	1565	75	3
NA	532058	CDC2-PCNA-CCNB1-GADD45G complex	10912;5111;891;983	159;261;433;297	1.5	6	1.5	9	4.5	19	6	29	279	1150	63	4
NA	524855	N-NOS-CHIP-HSP70-1 complex	10273;4842;3303	303;1434;641	0	9	1	7	6	18	0	29	641	2378	63	3
NA	6101	RBL2:E2F4/5:DP1/2:Cyclin E/A:CDK2	1017;1874;5934;7027;9134	298;413;1139;410;404	0	2	0	6	6	54	1	17	410	2664	79	5
NA	12270	LIG3:XRCC1:POL Beta complex at site of base repair	3980;5423;7515	1009;335;633	1	5	1	4	11	52	2	6	633	1977	67	3
NA	244477	MAPK8(JNK1) forms a complex with MAPK8IP1(JIP1) and APP	351;5599;9479	770;427;711	0	1	3	7	8	50	1	3	711	1908	61	3
NA	533088	ITGA6-ITGB4-CD151 complex	3655;3691;977	1091;1822;253	0	0	1	17	20	67	5	24	1091	3166	108	3
NA	55102	Nephrin dimer:NEPH1	4868;55243;58510	1241;757;536	0	0	2	20	2	5	0	1	757	2534	26	3
NA	524506	DAXX-DNMT1-DMAP1 complex	1616;1786;55929	752;1632;467	3	11	3	10	17	49	6	19	752	2851	89	3
NA	16527	NGF:p75NTR:NADE	27018;4803;4804	111;241;427	0	0	0	1	1	5	0	0	241	779	6	3
NA	251173	PRKCI complex with SQSTM1 and RIPK1	5584;8737;8878	596;671;440	0	0	3	10	23	62	6	17	596	1707	89	3
NA	65152	FP sub-complex	4723;4729;4731	464;249;473	1	2	0	0	1	17	1	3	464	1186	22	3
NA	52599	Cytochrome C:Apaf-1:ATP:Procaspase-9	317;54205;842	1248;105;416	0	3	1	3	3	13	2	7	416	1769	26	3
NA	524463	Brg1-based SWI/SNF chromatin remodeling complex	6598;6599;6601;86	385;1105;1214;429	0.5	7	1	4	7.5	37	8.5	32	767	3133	80	4
NA	533814	SMN-PolII-RHA complex	11218;1660;2959;50628;5430;6628;6629;6638;6908;8487;8926	824;1270;316;1058;1970;240;225;240;339;280;71	0	12	1	27	2	80	4	68	316	6833	187	11
NA	132550	netrin 1/DCC/Myosin X	1630;4651;9423	1447;2058;604	0	0	2	7	3	12	0	0	1447	4109	19	3
NA	17003	Grb2:pBTLA:HVEM	151888;2885;8764	289;217;283	0	4	1	6	0	1	0	6	283	789	17	3
NA	41723	Activated TrkA receptor:Phospho-IRS1/2	3667;4803;4914	1242;241;796	0	2	7	19	1	52	0	0	796	2279	73	3
NA	36028	HuR:APRIL:pp32:SET/SETalpha:Nup214/SETbeta:CRM1 Complex	1994;407977;6418;7514;8021;8125;8741;8742	326;330;290;1071;2090;249;250;249	0.5	11	1	10	5	93	1.5	31	308	4855	145	8
NA	528244	RNA polymerase II complex; incomplete (CDK8 complex); chromatin structure modifying	1024;2962;6598;6599;6601;892;902;9412	464;517;385;1105;1214;283;323;144	0	8	0	4	6	82	3	33	424.5	4435	127	8
NA	40000	Clathrin-coated vesicle	1173;1175;1211;1213;161;163	435;142;248;1675;939;951	0.5	13	2	21	3.5	20	6.5	62	687	4390	116	6
NA	21289	SHC1:p-ERBB4	2066;6464;9542	1308;584;858	0	2	3	25	2	9	1	3	858	2750	39	3
NA	168813	Arrestin/AP2	1173;160;408	435;977;418	0	1	1	3	5	18	4	15	435	1830	37	3
NA	524512	RGS6-DNMT1-DMAP1 complex	1786;55929;9628	1632;467;472	3	10	2	5	6	23	0	13	472	2571	51	3
NA	117860	WAVE2/Nap1/Sra1/ABI1/HSPC300	10006;10163;10787;26999;55845	508;498;1134;1253;75	0	1	2	15	11	57	3	21	508	3468	94	5
NA	526258	SVIP-p97/VCP-DERL1 complex	258010;7415;79139	77;806;251	0	20	0	9	2	50	0	29	251	1134	108	3
NA	530737	ITGAV-ITGB3-ADAM15 complex	3685;3690;8751	1048;788;863	0	0	2	6	3	7	5	12	863	2699	25	3
NA	45050	EGF:p-6Y-EGFR:CBL	1950;1956;867	1207;1210;906	1	4	10	27	11	44	0	17	1207	3323	92	3
NA	23817	dsRNA:RIG-I/MDA5:IPS-1:TRAF2/TRAF6:MEKK1	23586;4214;57506;7186;84282	925;1512;540;501;432	0	2	0	0	6	60	3	21	540	3910	83	5
NA	172007	IL-12R/TYK2/JAK2	3594;3595;3717;7297	662;862;1132;1187	0	0	4	23	1	4	0	1	997	3843	28	4
NA	118359	mTORC2/DEPTOR	2475;253260;55615;64223;64798;79109	2549;1708;388;326;409;522	0	2	0	8	11	122	0.5	15	465.5	5902	147	6
NA	131029	alpha4/beta1 Integrin/VCAM1/Paxillin/Talin	3676;3688;5829;7094;7412	1032;801;591;2541;739	0	3	4	26	4	50	2	14	801	5704	93	5
NA	794706	HDAC1-PP1	3065;3066;5499;5514;5525;5531	482;582;341;940;486;307	1.5	15	0.5	3	5	36	5	30	484	3138	84	6
NA	27861	Opioid:MOR:G protein-GTP complex	2775;2784;2790;4988;5443;548645;552891	354;340;68;493;267;360;153	0	1	0	3	0	10	0	2	340	2035	16	7
NA	524605	IL2-IL2RA-IL2RB complex	3558;3559;3560	153;272;551	0	0	0	6	2	4	0	0	272	976	10	3
NA	532908	DNA ligase IV-condensin complex	10051;10592;3981	1288;1197;911	4	14	1	4	3	23	5	16	1197	3396	57	3
NA	49435	Integrin alpha9beta1:Osteopontin	3680;3688;6696	1035;801;314	0	1	0	4	4	48	0	7	801	2150	60	3
NA	120221	IGF-1R heterotetramer/IGF1/IRS1/GRB2/Sos/Shc/RACK1	10399;2885;3479;3480;3667;6464;6654	317;217;153;1367;1242;584;1333	1	8	5	38	6	94	1	21	584	5213	161	7
NA	47608	Kainate receptor-glutamate complex	1739;83988;805	926;193;149	0	4	2	10	5	24	4	9	193	1268	47	3
NA	40642	Lysosome Cargo:AP-1:Beta-arrestin:Clathrin Triskelion:Vamp Complex	10053;1211;1213;162;164;4074;408;63915;81567;8673;8905	423;248;1675;949;825;277;418;187;432;100;157	0	11	1	22	1	16	2	63	418	5691	112	11
NA	199431	ERK1/2_p:Mkp3	1848;5594;5595	381;360;379	0	0	2	5	7	23	3	10	379	1120	38	3
NA	522260	HSP90-CDC37-LRRK2 complex	11140;120892;3326	378;2527;724	5	18	5	15	14	84	10	49	724	3629	166	3
NA	523341	Condensin II	10051;10592;23310;29781;54892	1288;1197;1498;605;1143	0	14	1	6	18	69	5	33	1197	5731	122	5
NA	523587	ITGAV-ITGB3-THBS1 complex	3685;3690;7057	1048;788;1170	0	0	2	4	3	7	0	7	1048	3006	18	3
NA	132623	Syndecan-2/RasGAP/Src	5921;6383;6714	1047;201;536	0	0	4	14	2	13	0	0	536	1784	27	3
NA	525667	gp78-p97/VCP-DERL1 complex	267;7415;79139	643;806;251	0	20	0	9	6	56	1	30	643	1700	115	3
NA	171830	4-1BBL/4-1BB/TRAF2	3604;7186;8744	255;501;254	0	0	0	0	0	5	1	9	255	1010	14	3
NA	128282	PDGF-BB/PDGFRB (dimer)/LRP1	1436;4035;5155;5159	972;4544;241;1106	0	0	5.5	27	3	13	0.5	5	1039	6863	45	4
NA	533452	ULBP1-KLRK1-HCST complex	10870;22914;80329	92;216;244	0	0	0	1	0	0	0	0	216	552	1	3
NA	63424	Meiotic Single-stranded DNA Complex	1019;11144;3014;3018;472;5888;6117;6118;6119;672;675;8350;8294	303;340;143;126;3056;340;616;270;121;1884;3418;136;103	1	38	2	20	7	136	4	60	303	10856	254	13
NA	49363	Integrin alpha7beta1:Laminin-1	284217;3679;3688;3912;3915	3075;1141;801;1786;1609	0	0	0	5	1	10	3	15	1609	8412	30	5
NA	532365	CHL2-BMP2-TSG complex	25884;57045;650	451;223;396	0	0	0	0	0	1	0	0	396	1070	1	3
NA	200670	Ci/Gli3:SCF ubiquitin ligase complex	2735;2736;2737;6500;8454;8945	1106;1586;1580;163;776;605	0	3	0	1	2	17	2	17	941	5816	38	6
NA	115520	Laminin 10	3911;3912;3915	3695;1786;1609	0	0	1	2	1	6	3	8	1786	7090	16	3
NA	49471	Integrin alpha10beta1:Collagen type-II:Mg++	1280;3688;8515	1487;801;1167	0	0	0	4	0	4	0	7	1167	3455	15	3
NA	133017	Ephrin A1/EPHA4/VAV2-VAV3	10451;1942;2043	847;205;986	0	0	3	8	1	6	1	2	847	2038	16	3
NA	8028	Collagen IV:vWF complex	1277;1278;7450	1464;1366;2813	0	1	0	0	0	2	0	1	1464	5643	4	3
NA	528200	MeCP2-SIN3A-HDAC complex	25942;3065;3066;4204	1273;482;582;498	3.5	17	1	6	8.5	36	5.5	20	540	2835	79	4
NA	14376	hp-IRAK1:K6-poly-Ub oligo-TRAF6:Activated TAK1 complex	10454;257397;3654;6885;7189	504;712;712;606;522	0	0	0	5	9	36	2	12	606	3056	53	5
NA	527099	Ubiquitin E3 ligase (CDT1; DDB1; CUL4A; RBX1)	1642;81620;8451;9978	1140;546;759;108	1	5	0.5	5	4	17	5	33	652.5	2553	60	4
NA	133330	NGF (dimer)/TRKA/FAIM	4803;4914;55179	241;796;213	0	0	0	7	0	1	0	2	241	1250	10	3
NA	168641	PML/sp100/SUMO1	5371;6672;7341	882;885;101	1	3	0	1	27	58	3	12	882	1868	74	3
NA	115335	JUN/FOS/NFAT1	2353;3725;4773	380;331;925	0	3	2	5	15	60	1	2	380	1636	70	3
NA	125249	RET51/GFRalpha1/GDNF/DOK1	1796;2668;2674;5979	481;228;465;1114	0	0	6	29	1	10	0	0	473	2288	39	4
NA	124263	Antigen/IgE/Fc epsilon R1	2205;2206;2207	257;244;86	0	0	2	5	1	4	0	1	244	587	10	3
NA	57987	Ubiquitinated Phospho-Cdc25A	6233;7311;7314;7316;993	156;128;229;685;524	3	16	1	4	4	27	8	37	229	1722	84	5
NA	124365	FOXO1/FHL2/SIRT1	2274;2308;23411	279;655;747	0	7	0	1	20	47	1	5	655	1681	60	3
NA	169879	progesterone/mPR/G-beta/G-gamma/G-alpha-I	2770;2782;2792;54852	354;340;74;330	0	0	0.5	2	0	1	2	12	335	1098	15	4
NA	43450	centrosome-associated NuMA	10426;10844;114791;121441;27175;27229;4926;7283;85378	907;902;1024;667;451;666;2115;451;1819	0	6	0	10	2	87	3	44	902	9002	147	9
NA	126373	PP2A	5515;5518;5521	309;589;446	1	3	1	3	1	3	9	33	446	1344	42	3
NA	528309	RBP-Jkappa-RING1-KyoT2 complex	2273;3516;6015	280;500;406	1	2	0	3	1	14	2	5	406	1186	24	3
NA	240095	CASP8 forms a complex with NLRC4 (IPAF) and PYCARD (ASC)	29108;58484;841	195;1024;538	1	2	0	3	0	5	1	4	538	1757	14	3
NA	121644	PTP1B/IRS1/GRB2	2885;3667;5770	217;1242;435	2	6	6	23	8	60	1	7	435	1894	96	3
NA	127241	alpha9/beta1 Integrin/VEGFC (dimer)	3680;3688;7424	1035;801;419	0	1	0	4	2	7	0	7	801	2255	19	3
NA	40202	Neurofascin:NrCAM:Ankyrin:spectrin based actin:Na+/K+ channel	23114;286;4897;55800;6323;6709;6712	1240;1897;1304;215;2009;2477;2390	0	11	3	21	4	49	0	4	1897	11532	85	7
NA	53079	BMAL1:CLOCK/NPAS2:CRY	1407;406;4862	586;625;824	1	2	0	2	1	3	0	2	625	2035	9	3
NA	795105	picNuA4	10524;54556;80314	546;418;836	3	7	1	2	3	8	1	2	546	1800	19	3
NA	190880	TAB3;TRAF2;TAB2	23118;257397;7186	693;712;501	0	0	1	4	9	23	0	8	693	1906	35	3
NA	118215	VEGFR3/Fibronectin/alpha5/beta1 Integrin	2324;2335;3678;3688	1363;2477;1049;801	0	0	3	17	3	12	1.5	10	1206	5690	39	4
NA	40283	L1:Integrin complex	3674;3690;3897	1039;788;1257	0	1	2	7	4	17	0	0	1039	3084	25	3
NA	252638	NLRP3 (Cryopyrin) forms a complex with PYCARD (ASC) and CASP1	114548;29108;440068	1036;195;110	0	1	0	0	0	0	0	1	195	1341	2	3
NA	114748	sTNF-alpha/TNFR1A/TRADD/RIP/TRAF2/p62/Atypical PKCs	5590;7124;7132;7186;8717;8737;8878	592;233;455;501;312;671;440	0	0	2	9	3	53	1	25	455	3204	87	7
NA	49232	Alpha2beta1 complex with Laminin-5	10319;3673;3688;3911;3913	1575;1181;801;3695;1798	0	0	0	5	1	8	2	13	1575	9050	26	5
NA	61009	SHP2/SHP1:pSIRP alpha:CD47	140885;5781;961	504;593;323	0	2	4	13	0	7	1	5	504	1420	27	3
NA	60048	ESCRT-II	11267;51028;84313	258;386;176	0	0	0	1	0	0	3	10	258	820	11	3
NA	529134	CS-MAP3K7IP1-MAP3K7IP2 complex	10454;1431;23118	504;466;693	0	7	1	2	6	17	1	6	504	1663	32	3
NA	39577	Netrin-1:pDCC dimer:pFAK:Src/Fyn	1630;5747;6714;9423	1447;1074;536;604	0	0	4.5	26	7	44	0	0	839	3661	70	4
NA	1921	apoA-I:CUBN:AMN complex	335;8029;81693	267;3623;453	0	0	0	0	0	6	0	0	453	4343	6	3
NA	60024	ESCRT-I/Cargo Complex	137492;155382;51160;55048;6233;7251;7311;7314;7316;79720	397;251;233;355;156;390;128;229;685;285	0.5	17	1	6	1.5	18	3	43	268	3109	84	10
NA	106777	platelet-activating factor acetylhydrolase IB	5048;5049;5050	410;229;231	0	1	0	2	0	2	2	6	231	870	11	3
NA	64247	Tyrosine phosphorylated IL6 receptor hexamer:Activated JAKs:Tyrosine/serine phosphorylated STAT1/3	3569;3570;3572;3717;6772	212;468;918;1132;750	0	2	3	25	1	15	0	9	750	3480	51	5
NA	126764	VHL/Elongin B/Elongin C/RBX1/CUL2/HIF1A	3091;6921;6923;7428;8453;9978	826;112;161;213;745;108	0.5	5	0.5	4	1.5	15	2	24	187	2165	48	6
NA	531614	ITGAV-ITGB5-SPP1 complex	3685;3693;6696	1048;799;314	0	1	2	4	4	50	1	8	799	2161	63	3
NA	201784	IL-13:JAK1:IL-13RA-1:IL-4R alpha:TYK2	3566;3596;3597;3716;7297	825;146;427;1154;1187	0	0	4	16	1	10	1	8	825	3739	34	5
NA	120262	TCF4/beta catenin/HBP1	1499;26959;6934	781;514;596	2	5	0	10	5	30	3	17	596	1891	62	3
NA	126998	SMAD3/SMAD4/ER alpha	2099;4088;4089	595;425;552	5	16	0	3	10	35	1	4	552	1572	58	3
NA	533619	ESCRT-III complex	128866;25978;27243;29082;5119;51510;51652;57132;79643;92421	224;213;222;265;196;219;222;199;201;233	0	3	0	2	2	16	1.5	22	220.5	2194	43	10
NA	169910	IFN-gamma R-alpha/IFN-gamma R-beta/JAK1/JAK2	3459;3716;3717	489;1154;1132	0	0	4	23	4	11	3	8	1132	2775	42	3
NA	799041	APC-cdc20.complex	10393;246184;29882;29945;51433;51434;51529;64682;8697;8881;991;996	185;85;822;808;755;599;196;1944;597;620;499;830	0	4	1	9	8	138	6.5	82	609.5	7940	233	12
NA	204540	(PDGF:PDGF Receptor_p):Shc	25759;5154;5155;5156;5159;53358;6464	582;211;241;1089;1106;594;584	0	0	3	44	0	8	0	2	584	4407	54	7
NA	133509	NGF (dimer)/TRKA/p62/Atypical PKCs	4803;4914;5584;8878	241;796;596;440	0	0	4	15	12	59	0.5	11	518	2073	85	4
NA	121521	TSC1/TSC2/IKK beta	3551;7248;7249	756;1164;1807	0	1	3	8	18	65	2	8	1164	3727	82	3
NA	239442	REL and NFKB1 complex with the IRF4 promoter	3662;4790;5966	451;969;619	0	3	2	7	6	22	5	10	619	2039	42	3
NA	526995	ITGA7-ITGB1-ITGB1BP3 complex	27231;3679;3688	230;1141;801	0	0	0	4	0	4	1	8	801	2172	16	3
NA	127014	BCL10/MALT1/TRAF6	10892;7189;8915	824;522;233	0	0	0	2	1	10	2	15	522	1579	27	3
NA	121438	alpha9/beta1 Integrin/ADAM15	3680;3688;8751	1035;801;863	0	1	2	6	1	5	5	12	863	2699	24	3
NA	124380	TCF4E/beta catenin/BCL9	1499;607;6934	781;1426;596	2	5	0	10	13	40	3	16	781	2803	71	3
NA	16122	spherical HDL:apoA-I:apoA-II:apoA-IV:apoC-II:apoC-III	335;336;337;344;345	267;100;396;101;99	0	0	0	1	0	9	0	0	101	963	10	5
NA	525593	NuA4/Tip60-HAT complex A	10524;10856;10902;10933;26122;54556;55257;55929;57634;64769;80314;8089;8295;86;8607	546;463;1235;362;807;418;204;467;3122;201;836;227;3830;429;456	2	28	0	11	3	75	1	66	463	13603	180	15
NA	171728	PRC2 complex	2146;23512;3065;3066;5928;5931;7528;8726	751;739;482;582;425;425;414;441	1.5	17	0	4	6.5	51	4	37	461.5	4259	109	8
NA	38568	GRB2:SOS1:p-KIT complex	2885;3815;4254;6654	217;976;273;1333	0	4	3.5	21	3.5	19	1	8	624.5	2799	52	4
NA	114260	uPA/uPAR/alphav/beta3 Integrin/Vitronectin	3685;3690;5328;5329;7448	1048;788;431;335;478	0	0	0	4	3	17	0	7	478	3080	28	5
NA	128809	Aurora B/RasGAP/Survivin	332;5921;9212	165;1047;344	0	0	2	6	5	16	0	10	344	1556	32	3
NA	523523	BRG1-SIN3A-HDAC containing SWI/SNF remodeling complex I	10419;25942;3066;6597;6598;6599;6601;6602;6605;8289;86	637;1273;582;1679;385;1105;1214;515;411;2285;429	1	22	2	24	6	118	7	74	637	10515	238	11
NA	521945	Tumor necrosis factor receptor 1 signaling complex	329;7132;7186;8717	618;455;501;312	0	0	0	2	3	13	4.5	23	478	1886	38	4
NA	131528	BDNF (dimer)/TRKB/GIPC	10755;4915;627	333;838;329	0	0	1	7	0	0	0	5	333	1500	12	3
NA	531800	Respiratory chain complex I (intermediate VII/650kD); mitochondrial	374291;4535;4695;4700;4704;4720;4722;4724;4725;4729	213;318;99;154;377;463;264;175;106;249	0	1	0	1	0	9	1	14	231	2418	25	10
NA	522577	G protein complex (PTHR1; GNB1; GNG2)	2782;54331;5745	340;71;593	0	0	0	0	1	3	0	4	340	1004	7	3
NA	252309	IL17RB-IL25-IL17RA complex assembly	23765;55540;64806	866;502;177	0	0	1	2	0	0	0	0	502	1545	2	3
NA	528634	BLOC-1 (biogenesis of lysosome-related organelles complex 1)	23557;26258;2647;282991;388552;55330;63915;84062	136;172;125;142;202;217;187;351	0	3	0	2	0.5	15	0	1	179.5	1532	21	8
NA	169245	Poly (I:c)TLR3/TLR3/MYD88/IRAK	3654;4615;7098	712;309;904	0	0	1	3	1	11	1	6	712	1925	20	3
NA	532138	NCOR2 complex	25942;3065;3066;8819;8841;9611;9612	1273;482;582;220;428;2440;2524	2	27	1	16	6	154	1	21	582	7949	218	7
NA	130423	alpha9/beta1 Integrin/ADAM12	3680;3688;8038	1035;801;909	0	1	1	5	1	5	0	7	909	2745	18	3
NA	124883	alphaM/beta2 Integrin/RAGE/HMGB1	177;3146;3684;3689	404;215;1152;769	0	10	0	3	4	14	0.5	14	586.5	2540	41	4
NA	129981	SDF1/CXCR4/SHP1-2	5781;6387;7852	593;140;356	0	2	1	10	7	21	1	3	356	1089	36	3
NA	30627	ESCRT-I	137492;155382;51160;55048;7251;79720	397;251;233;355;390;285	0	1	0	2	0	4	0.5	7	320	1911	14	6
NA	61432	calcium channel multimer of R type VGCC	27092;55799;777;783	327;1091;2270;660	0	2	0	1	3	13	0	1	875.5	4348	17	4
NA	167476	beta-catenin/TCF/CtBP1/CBP/TLE1/SMAD4	1387;1487;1499;4089;6927;7088	2442;440;781;552;631;770	2	27	0	15	6.5	63	1.5	19	700.5	5616	124	6
NA	170462	IL-22/IL-22/IL-22R1/JAK1	3716;50616;58985	1154;179;574	0	0	2	6	1	7	0	5	574	1907	18	3
NA	55197	Nephrin dimer:CASK	4868;55243;58510;8573	1241;757;536;921	0	0	2.5	23	2.5	8	0.5	4	839	3455	35	4
NA	19155	Talin:RIAM complex	54518;5908;7094	666;184;2541	0	3	2	14	5	14	2	9	666	3391	40	3
NA	200236	Epac1:cAMP:Rap1	10411;11069;5906;5908	923;1011;184;184	0	1	1	4	1	4	0.5	3	553.5	2302	12	4
NA	252814	BIRC4 forms a complex with APAF1 and CASP3	317;331;836	1248;497;277	0	1	0	1	2	7	2	11	497	2022	20	3
NA	524061	CAND1-CUL3-RBX1 complex	55832;8452;9978	1230;768;108	0	3	2	4	5	13	8	22	768	2106	42	3
NA	39549	FADK1:DCC oligomer:Netrin	1630;5747;9423	1447;1074;604	0	0	2	19	3	33	0	0	1074	3125	52	3
NA	45306	EGF:p-6Y-EGFR:p-Y371-CBL:CIN85:SPRY1/2:Endophilin:Epsin:Eps15R:Eps15	10252;1950;1956;2060;29924;30011;58513;6456;8027;867;9146	319;1207;1210;896;662;665;864;352;540;906;777	0	6	2	49	11	125	7	87	777	8398	267	11
NA	35743	DCP1-DCP2 Decapping Complex	1656;167227;196513;23644;55802;80153	483;420;617;1401;582;508	0	2	3	17	8	73	1	12	545	4011	104	6
NA	130085	cortisol/GR alpha/BRG1/BAF155/BAF170/BAF60A	2908;6597;6599;6601;6602	778;1679;1105;1214;515	3	14	1	5	15	76	9	36	1105	5291	131	5
NA	121071	LIP1/LKB1/SMAD4	114790;4089;6794	1099;552;433	5	14	0	0	6	21	2	5	552	2084	40	3
NA	17557	E3:K48-polyubiquitinated substrate	10393;246184;25847;29882;29945;51433;51434;51529;64682;8697;8881;991;996	185;85;74;822;808;755;599;196;1944;597;620;499;830	0	4	1	9	8	138	6	82	599	8014	233	13
NA	172754	Cytokine receptor/JAKs/TYK2	3640;3718;7297	131;1124;1187	0	0	5	12	2	6	1	4	1124	2442	22	3
NA	48156	GRB10:INSR	2887;3630;3643;723961	594;110;1382;200	0	1	1	13	4.5	26	0	3	397	2286	43	4
NA	170672	ARP2/3/WASP	10093;10094;10095;10096;10097;10109;10552;142685;8976	168;178;372;418;399;300;370;588;505	2	18	1	12	1	12	2	47	372	3298	89	9
NA	203047	JAK1:LIFR:JAK2:STAT3	3572;3716;3717;3977;6774	918;1154;1132;1097;770	0	3	7	35	6	28	1	15	1097	5071	81	5
NA	196830	BMP2:BMPR1	650;657;658	396;532;502	0	0	0	0	0	4	0	1	502	1430	5	3
NA	48222	PI3K:p-KIT:sSCF dimer:p-KIT	3815;4254;5290;5295	976;273;1068;724	0	1	7	28	3.5	13	0	2	850	3041	44	4
NA	120028	alpha6/beta4 Integrin/Laminin 11	3655;3691;3911;3913;3915	1091;1822;3695;1798;1609	0	0	1	18	1	68	4	28	1798	10015	114	5
NA	533271	RAD9-RAD1-HUS1-POLB complex	3364;5423;5810;5883	280;335;282;391	0	1	0.5	2	2	15	1	5	308.5	1288	23	4
NA	523198	LIG1-9-1-1 complex	3364;3978;5810;5883	280;919;282;391	0	0	0	1	6.5	39	1	6	336.5	1872	46	4
NA	126943	uPA/uPAR/alpha3/beta1 Integrin/Vitronectin	3675;3688;5328;5329;7448	1051;801;431;335;478	0	0	0	5	2	16	0	8	478	3096	29	5
NA	525125	Gamma-BAR-AP1 complex	10053;1174;130340;162;164;55435;8905;8906;8907	423;158;154;949;825;302;157;785;435	0	3	1	12	0	8	3	35	423	4188	58	9
NA	532651	FHL2-p53-HIPK2 complex	2274;28996;7157	279;1198;393	0	13	1	4	2	32	8	27	393	1870	76	3
NA	200155	adenylate cyclase:G alpha i_GTP	107;108;109;111;112;113;114;115;196883;2770;2771;55811	1119;1091;1144;1261;1168;1080;1251;1353;1077;354;355;1610	0	2	0	8	1	21	0.5	27	1131.5	12863	58	12
NA	20558	TFIIIB:SNAPc:Oct-1:Staf:Type 3 Promoter Complex	10302;5451;55290;55814;6617;6618;6619;6621;6908;7702	98;743;419;2624;368;334;411;1469;339;638	0	3	0	5	2	50	0.5	10	415	7443	68	10
NA	130138	Fc epsilon R1/FcgammaRIIB/SHIP	2205;2206;2207;2213;3635;9103	257;244;86;310;1189;323	0	1	1.5	12	1	9	0	3	283.5	2409	25	6
NA	19328	Talin:RIAM:ECM ligands:2X (Integrin alphaIIb beta3:Active (p-Y419)-SRC):SYK	2335;3674;3690;54518;5906;6714;6850;7094	2477;1039;788;666;184;536;635;2541	0	3	2	42	4.5	38	1	10	727	8866	93	8
NA	119833	TGFB/TGFBR2/TGFBR1/STRAP/SMAD7	11171;4092;7043;7046;7048	350;426;412;503;592	0	2	1	6	6	29	0	10	426	2283	47	5
NA	120301	IL5/IL5RA/JAK2	3567;3568;3717	134;420;1132	0	0	1	16	0	1	0	0	420	1686	17	3
NA	200019	G alpha q_GDP:(G beta:G gamma)	10681;2776;2784;2793	395;359;340;69	0.5	2	0	0	0.5	3	0	2	349.5	1163	7	4
NA	126680	MRP8/MRP14/TLR4/MD2 (dimer)	23643;6279;6280;7099	160;93;114;839	0	0	0	2	0.5	4	0	0	137	1206	6	4
NA	60765	Tyrosine phosphorylated IL6 receptor hexamer:Activated JAKs:SHP2	3569;3570;3572;3716;5781	212;468;918;1154;593	0	2	4	20	6	26	0	6	593	3345	54	5
NA	125770	HGF(dimer)/MET(dimer)/GRB2	2885;3082;4233	217;728;1408	0	4	5	16	1	15	6	16	728	2353	51	3
NA	172309	Integrin-alpha/Integrin-beta/Caveolin-1/FYN	2534;3672;3688;857	537;1179;801;178	0	1	4	18	5	20	3.5	14	669	2695	53	4
NA	2150	GPIb-IX-V:vWF:filamin-A	2316;2811;2812;2814;2815;7450	2647;639;206;560;177;2813	0	16	0	19	1	46	0	19	599.5	7042	100	6
NA	129488	HDAC4/HDAC3/SMRT (N-CoR2)	8841;9612;9759	428;2524;1084	1	9	1	6	15	97	0	1	1084	4036	113	3
NA	123181	Ephrin A1/EPHA2/VAV2-VAV3	10451;1942;1969	847;205;976	0	0	3	14	5	31	1	13	847	2028	58	3
NA	13545	MRE11:RAD50:NBS1 complex	10111;4361;4683	1312;708;754	3	14	1	3	19	44	7	23	754	2774	84	3
NA	127141	VEGFR2 (dimer)/VEGFA (dimer)/Myoferlin/Dynamin 2/GTP	1785;26509;3791;7422	870;2061;1356;412	1.5	7	4	15	6.5	24	3	17	1113	4699	63	4
NA	532425	TGM2-HD-CALM1 complex	3064;7052;805	3144;687;149	4	10	2	4	5	31	4	8	687	3980	53	3
NA	13383	TRAIL:TRAIL receptor-2:FADD complex	8743;8772;8795	281;208;440	0	0	0	1	3	6	0	1	281	929	8	3
NA	531476	HDAC1-associated protein complex	1107;23028;23186;3065;53615;5928;5931;8932;9219	2059;876;482;482;291;425;425;411;668	2	26	0	9	7	76	3	39	482	6119	150	9
NA	252666	IRF1 and IRF2 complex with the ISG15 promoter	3659;3660;9636	325;349;165	0	5	0	1	0	0	0	1	325	839	7	3
NA	124759	MYC/Max/p14ARF	1029;4149;4609	156;160;454	4	11	0	3	9	28	0	7	160	770	49	3
NA	525972	Gamma-secretase-Delta1 complex	23385;28514;51107;55851;5663	709;723;265;101;467	0	0	0	0	0	12	0	4	467	2265	16	5
NA	5592	TAK1/TAB2 complex bound to TRAF6/CBM complex	10892;23118;5170;6885;7189;84433;8915	824;693;556;606;522;1154;233	0	1	0	9	9	58	2	20	606	4588	88	7
NA	117363	RET9/GFRalpha1/GDNF/SHC	2668;2674;5979;6464	228;465;1114;584	0	0	1.5	20	1	8	0	1	524.5	2391	29	4
NA	125118	alphav/beta3 Integrin/CD47/Type IV Collagen	1287;3685;3690;961	1691;1048;788;323	0	0	1	4	2	8	1.5	10	918	3850	22	4
NA	13116	Processive complex loaded on telomere:Okazaki fragment:Flap:RPA heterotrimer:dna2	10714;1763;5111;5424;5425;57804;6117;6118;6119	466;1146;261;1107;469;107;616;270;121	0	12	1	10	2	38	4	61	466	4563	121	9
NA	205250	TRADD:RIP	11035;8717;8737;8767	518;312;671;540	0	0	1	5	3	24	2	10	529	2041	39	4
NA	239205	CUEDC2 forms a complex with PPP1CA and PPP1R15A (GADD34)	23645;5499;79004	674;341;287	0	1	1	2	1	4	8	17	341	1302	24	3
NA	65737	mRNA Cleaved by SMG6	1981;22916;23293;23381;26986;4686;5515;5518;5520;5976;9887	1599;156;1419;1016;636;790;309;589;447;1118;1137	2	18	1	21	3	69	6	95	790	9216	203	11
NA	522159	LIN2-LIN7-SAP97-MINT1 complex	1739;320;8573;8825	926;837;921;233	0	0	3	14	3.5	26	1.5	7	879	2917	47	4
NA	18288	HLA-G interacting with KIR2DL4	3135;3805;567	338;377;119	0	0	0	0	0	0	0	1	338	834	1	3
NA	61424	calcium channel multimer of N type VGCC	10369;774;784;9254	323;2339;484;1145	0	0	1.5	8	1	9	0.5	4	814.5	4291	21	4
NA	523671	TGF-beta-receptor-PAR6 complex	50855;7046;7048	346;503;592	0	0	0	4	10	23	0	2	503	1441	29	3
NA	246895	ELF1 and HMGA1 form a complex with IL2RA promoter	1997;3159;3559	619;107;272	0	14	0	1	9	27	1	4	272	998	46	3
NA	20535	SNAPc:Oct-1:Staf:Type 3 Promoter Complex	10302;5451;6617;6618;6619;6621;7702	98;743;368;334;411;1469;638	0	1	0	3	3	41	0	5	411	4061	50	7
NA	118521	RB1/E2F1-3/DP/HDAC3/RBBP4	1869;5925;5928;7027;8841	437;928;425;410;428	2	13	0	7	4	44	2	7	428	2628	71	5
NA	120639	nectin-3(dimer)/I-afadin/I-afadin/Necl-5(dimer)	25945;4301;5817	549;1651;417	0	0	3	22	0	23	1	5	549	2617	50	3
NA	169090	BCL-XL/BCL-2/APAF-1	317;596;598	1248;239;233	0	0	0	1	4	13	2	4	239	1720	18	3
NA	521854	SMN complex	11171;11218;25929;50628;6626;6628;79760;79833;8487;6606	350;824;1508;1058;282;240;131;167;280;294	0	5	1	9	1.5	56	3	32	288	5134	102	10
NA	119810	PDGF-AB/PDGFRA (dimer)	5154;5155;5156	211;241;1089	0	0	0	16	0	1	0	0	241	1541	17	3
NA	169670	BMP/BMPR-II/ALK3	653;657;659	454;532;1038	0	0	0	3	4	17	0	1	532	2024	21	3
NA	127101	TRAIL/TRAILR1/DAP3/GTP/FADD	7818;8743;8772;8797	398;281;208;468	0	2	0.5	2	3	21	0.5	3	339.5	1355	28	4
NA	29242	Collagen alpha-3(IV):Collagen alpha-4(IV):Collagen alpha-5(IV) triple helix	1285;1286;1287	1670;1690;1691	0	0	0	2	3	8	1	2	1690	5051	12	3
NA	2886	pol II promoter:TFIID:TFIIA:TFIIB complex	2957;2958;2959;6872;6874;6875;6877;6878;6880;6881;6882;6883;6884;6908	376;109;316;1893;1085;862;800;677;264;218;211;161;124;339	0	4	0	7	1.5	41	0	12	327.5	7435	64	14
NA	259112	BAFF-induced complex assembly of BAFFR; TRAF3 and TRAF3IP2	10758;115650;7187	565;184;568	0	0	0	0	0	0	0	3	565	1317	3	3
NA	128662	alpha4/beta1 Integrin/CD14	3676;3688;929	1032;801;375	0	0	1	5	3	7	2	9	801	2208	21	3
NA	528861	EED-EZH2 complex	121536;2146;23512;5928;8726	517;751;739;425;441	0	2	0	0	8	36	2	13	517	2873	51	5
NA	39255	Sema3A:Nrp-1:PlexinA:Fyn:pCdk5	1020;10371;2534;5362;8829;8851	292;771;537;1894;923;307	0	1	1.5	17	2.5	21	0	6	654	4724	45	6
NA	248520	TSC1 and TSC2 form a complex with TBC1D7	51256;7248;7249	293;1164;1807	0	0	2	7	12	47	3	10	1164	3264	64	3
NA	55123	NEPH1:p-Nephrin:Fyn	2534;4868;55243;58510	537;1241;757;536	0	0	6	30	2.5	15	0	1	647	3071	46	4
NA	530785	SKI-SMAD2-SMAD4 pentameric complex	4087;4089;6497	467;552;728	4	11	0	1	5	24	2	5	552	1747	41	3
NA	28922	RasGRF:Ca/calmodulin	10142;1742;2902;2906;4747;5923;5924;815;817;88;805	3907;767;938;1336;543;1273;1237;489;499;894;149	0	6	2	26	5	65	1	16	894	12032	113	11
NA	41776	Activated TrkA receptor complex:Clathrin-coated vesicle	1173;1175;1211;1213;161;163;4803;4914;6456	435;142;248;1675;939;951;241;796;352	0	13	1	29	2	23	6	62	435	5779	127	9
NA	525250	LRP-1-Alpha-2-M-annexin VI complex	2;309;4035	1474;673;4544	1	14	3	11	2	10	0	9	1474	6691	44	3
NA	244630	EGR1; EGR2 and EGR3 complex with the IL4 promoter	1958;1959;1960;3565	543;476;387;153	0	0	0	0	0.5	8	0	0	431.5	1559	8	4
NA	4664	PXN:CSK:SRC	1445;5829;6714	450;591;536	0	0	7	19	11	46	0	1	536	1577	66	3
NA	122798	CDC42/GTP/IRSP53/Mena	10458;55740;998	552;591;191	0	2	3	11	14	30	6	15	552	1334	58	3
NA	133223	ILK/PINCH1/NCK2	3611;3987;8440	452;325;380	0	0	1	5	3	8	0	10	380	1157	23	3
NA	43715	Cyclin D:phospho-CDK4/6:p21/p27	1021;1027;896	326;198;292	0	2	2	5	9	25	3	9	292	816	41	3
NA	123094	alpha6/beta4 Integrin/Laminin 5	3655;3691;3909;3914;3918	1091;1822;3333;1172;1193	0	0	2	22	5	74	5	27	1193	8611	123	5
NA	199786	PKA	5566;5567;5568;5573;5575;5576;5577	351;398;351;381;381;404;418	0	3	1	10	6	41	4	33	381	2684	87	7
NA	815153	IL-1R1/MYD88/Traf6.complex	3552;3553;3554;4615;7189	271;269;569;309;522	0	0	1	4	0	3	0	3	309	1940	10	5
NA	521324	FAS-FADD-CASP8-CASP10 complex	355;841;843;8772	335;538;522;208	0	1	2	7	4	15	1.5	6	428.5	1603	29	4
NA	120206	IL2/IL2R beta/gamma/JAK1/Fyn/JAK3	2534;3558;3560;3561;3640;3716;3718	537;153;551;369;131;1154;1124	0	0	4	29	2	24	0	10	537	4019	63	7
NA	47718	BMP:p-BMPR:I-SMAD:SMURF	4091;57154;650;657;659	496;757;396;532;1038	0	0	0	4	1	17	0	1	532	3219	22	5
NA	529813	CHUK-IKBKB-MAP3K14 complex	1147;3551;9020	745;756;947	0	1	0	3	4	23	1	7	756	2448	34	3
NA	522133	CyclinD3-CDK4-CDK6-p21 complex	1019;1021;1026;896	303;326;164;292	1.5	7	0.5	3	6.5	26	6	18	297.5	1085	54	4
NA	18300	KIR2DS1 complexed with DAP12	3803;3806;3808;3810;7305	348;304;304;304;113	0	0	2	10	0	0	0	0	304	1373	10	5
NA	126426	Intersectin/N-WASP	142685;6453;8976	588;1721;505	2	5	1	3	2	17	0	1	588	2814	26	3
NA	18811	Thrombin-activated PAR:Gq (active)	10681;2790;548645;552891;9002;9630	395;68;360;153;385;355	0	0	0	0	0	0	0	0	357.5	1716	0	6
NA	38998	Sema4D:Plexin-B1:Rac-Rnd1:LARG/PDZ-RhoGEF	10507;2064;27289;5364;9826;998	862;1255;232;2135;1562;191	0	2	1	17	1.5	37	0	13	1058.5	6237	69	6
NA	121491	AKT1/mTOR/p70S6K/Hsp90/TERT	207;2475;3320;6198;7015	480;2549;854;525;1132	1	27	2	18	13	73	4	44	854	5540	162	5
NA	13946	mono-ubiquitinated FANCD2	2177;6233;7311;7314;7316	1471;156;128;229;685	3	16	1	6	4	35	8	49	229	2669	106	5
NA	48838	Ub-ERBB4jmAcyt1s80:NEDD4	2066;4734;6233;7311;7314;7316	1308;1247;156;128;229;685	3	18	1	27	4	23	8	40	457	3753	108	6
NA	205484	Wnt:WIF	11197;51384;54361;7471;7472;7473;7474;7475;7476;7477;7478;7479;7480;7481;7482;7483;7484;80326;81029;89780	379;365;351;370;360;355;380;365;349;349;351;351;389;354;391;365;357;417;359;352	0	0	0	3	0	5	0	0	359.5	7309	8	20
NA	531701	MYC-MAX-BLOC1S1 complex	2647;4149;4609	125;160;454	4	11	0	3	9	25	1	8	160	739	47	3
NA	121100	E2/ERA (dimer)/Src-1/MPG	2099;4350;8648	595;298;1441	0	8	0	3	20	46	1	3	595	2334	60	3
NA	54554	IL2:IL2R trimer p-(Y338;392;510)-beta subunit:p-JAK1:JAK3:p-SHC	3558;3559;3560;3561;3640;3716;3718;6464	153;272;551;369;131;1154;1124;584	0	0	3.5	22	2	22	0.5	11	460	4338	55	8
NA	205459	beta-catenin:TCF	1499;51176;6932;6934;83439	781;399;384;596;588	2	8	0	10	5	32	0	16	588	2748	66	5
NA	63955	VBC complex	6921;6923;7428	112;161;213	0	1	1	2	0	5	2	5	161	486	13	3
NA	123277	proNGF (dimer)/p75(NTR)/Sortilin/MAGE-H1	28986;4803;4804;6272	219;241;427;831	0	0	0	1	1	6	0	1	334	1718	8	4
NA	131020	FANCD2/FANCI/H2AX	2177;3014;55215	1471;143;1328	0	4	2	5	11	39	13	42	1328	2942	90	3
NA	124453	IL4/IL4R/JAK1/IL2R gamma/JAK3/SHP1	3561;3565;3566;3640;3716;3718;5777	369;153;825;131;1154;1124;624	0	1	4	28	1	14	2	14	624	4380	57	7
NA	45210	Eps15:HGS:STAM	2060;8027;9146	896;540;777	0	2	3	14	5	22	12	41	777	2213	79	3
NA	6715	ORC:origin	23594;23595;4998;4999;5000;5001;84515	252;712;861;577;436;435;840	0	1	0	5	2	40	1	22	577	4113	68	7
NA	236871	STAT3 forms a complex with DNMT1 and HDAC1	1786;3065;6774	1632;482;770	7	19	3	11	7	30	9	30	770	2884	90	3
NA	8899	p-TYK2:p-IFNAR1:SOCS-1/SOCS-3:IFNA/B:IFNAR2:p-JAK1:STAT2	3439;3447;3454;3455;3716;6773;7297;9021	189;190;557;515;1154;851;1187;225	0	4	2.5	21	2	20	0.5	9	536	4868	54	8
NA	130385	alpha7X1/beta1 Integrin/Laminin 11	3679;3688;3911;3913;3915	1141;801;3695;1798;1609	0	0	0	5	0	5	3	16	1609	9044	26	5
NA	239005	TNFRSF1A forms a complex with SRC and SH3KBP1 (CIN85)	30011;6714;7132	665;536;455	0	0	2	9	11	32	0	0	536	1656	41	3
NA	202989	JAK1:LIFR:JAK2:LIF	3572;3716;3717;3976;3977	918;1154;1132;202;1097	0	0	4	28	3	21	0	6	1097	4503	55	5
NA	131243	MYC/Max/PML4	4149;4609;5371	160;454;882	4	13	0	3	15	52	7	14	454	1496	82	3
NA	127961	alpha2/beta1 Integrin/Type III Collagen	1281;3673;3688	1466;1181;801	0	1	1	5	3	9	2	9	1181	3448	24	3
NA	6069	RBL1:Cyclin E/A:CDK2	1017;5933;9134	298;1068;404	1	2	1	6	7	33	1	13	404	1770	54	3
NA	26270	FPRL1:FPRL1 ligands	2358;6288;6289	351;122;122	0	0	0	1	0	5	0	0	122	595	6	3
NA	203079	TPOR:JAK2:STAT3	3717;4352;6774	1132;635;770	0	3	7	25	1	9	2	11	770	2537	48	3
NA	54908	alcohol dehydrogenase 1 (class I); alpha/beta dimer	124;125;126	375;375;375	1	2	1	3	3	7	0	0	375	1125	12	3
NA	49400	Integrin alpha8beta1:Fibronectin	2335;3688;8516	2477;801;1063	0	0	2	6	4	10	3	11	1063	4341	27	3
NA	122892	sTNF-alpha/TNFR1A/TRADD/TRAF2/FADD	7124;7132;7186;8717;8772	233;455;501;312;208	0	0	0	2	3	14	0	9	312	1709	25	5
NA	794398	DAB	2957;2958;2959;51616;6872;6873;6874;6875;6877;6878;6879;6880;6881;6882;6883;6884;6908;8148;83860	376;109;316;251;1893;1199;1085;862;800;677;349;264;218;211;161;124;339;592;929	0	10	0	21	3	97	0	16	349	10755	144	19
NA	202327	IL-3:JAK2:IL-3R:JAK1	1439;3562;3563;3716;3717	897;152;378;1154;1132	0	0	4	27	1	9	0	5	897	3713	41	5
NA	125056	KSR/14-3-3 (dimer)/MEK1-2-active	5604;7531;8844	393;255;762	0	4	0	1	11	32	8	21	393	1410	58	3
NA	132189	alpha5/beta1 Integrin/Fibrinogen	2243;2244;2266;3678;3688	866;491;453;1049;801	0	2	1	6	2	16	0	9	801	3660	33	5
NA	15663	IL1 receptor complex-activated IRAK4:TOLLIP:hp-IRAK:TRAF6	3553;3554;3556;3654;4615;51135;54472;7189	269;569;570;712;309;460;274;522	0	2	1	9	0.5	29	0.5	13	491	3685	53	8
NA	201411	IGF-1R_p:Shc	25759;3480;53358;6464	582;1367;594;584	0	1	4.5	22	3	25	0.5	2	589	3127	50	4
NA	200537	(HGF:Met_p):(Grb2:Sos)	2885;3082;4233;6654;6655	217;728;1408;1333;1332	0	4	3	21	1	28	0	16	1332	5018	69	5
NA	121056	NF kappa B1 p50/RelA/I kappa B alpha/beta Arrestin2	409;4790;4792;5970	409;969;317;551	3	13	2	6	9	35	3.5	12	480	2246	66	4
NA	130936	Chromosomal passenger complex/EVI5	332;3619;55143;7813;9212	165;918;280;810;344	0	2	1	6	11	128	1	14	344	2517	150	5
NA	526813	MCM2-MCM6-MCM7 complex	4171;4175;4176	904;821;719	2	5	3	8	7	33	22	50	821	2444	96	3
NA	122863	JUN/NFAT1-c-4/p21SNFT	3725;4775;55509	331;1075;127	0	3	1	2	15	36	0	1	331	1533	42	3
NA	532570	MRG15-PAM14-RB complex	10933;5925;93621	362;928;127	1	8	0	6	0	29	3	15	362	1417	58	3
NA	533305	GPI-GnT activity complex	5277;5279;5283;9091	484;297;188;581	0	0	0	0	0.5	2	0	1	390.5	1550	3	4
NA	202604	JAK1:IL-7R:JAK3	3561;3575;3640;3716;3718	369;459;131;1154;1124	0	0	4	16	2	13	2	10	459	3237	39	5
NA	16561	NGF ligand:p75NTR:NADE:14-3-3epsilon	27018;4803;4804;7531	111;241;427;255	0	4	0.5	2	2.5	11	0	13	248	1034	30	4
NA	121576	alphaIIb/beta3 Integrin/paxillin/GIT1	28964;3674;3690;5829	770;1039;788;591	0	0	5	20	19	74	0	0	779	3188	94	4
NA	125908	TNF-alpha/TNFR1A/TRADD/MADD/cIAP2/RIP/TRAF2/RAIDD/PIDD	330;55367;7124;7132;7186;8567;8717;8737;8738	604;910;233;455;501;1647;312;671;199	0	0	0	4	3	36	0	16	501	5532	56	9
NA	118327	GRIN2B/RELN/LRP8/DAB1/Fyn	1600;2534;2904;5649;7804	555;537;1484;3460;963	0	3	5	30	2	25	0	1	963	6999	59	5
NA	12526	pre-incision complex in GG-NER	1022;1642;1643;2068;2071;2073;2965;2966;2967;2968;4331;5887;6117;6118;6119;7507;7508;902	346;1140;427;760;782;1186;548;395;308;462;309;409;616;270;121;273;940;323	0	13	0	13	2.5	91	4	100	418	9615	217	18
NA	8936	IFNA/B:IFNAR2:p-JAK1:STAT2:p-IFNAR1:p-TYK2:p-STAT2:STAT1	3439;3447;3454;3455;3716;6772;6773;7297	189;190;557;515;1154;750;851;1187	0.5	6	3	22	2	21	0.5	17	653.5	5393	66	8
NA	4081	Cyclin A:phospho-Cdk(Thr 160):Cdh1:phosho-APC/C complex	1017;10393;11065;246184;29882;29945;51343;51433;51434;51529;64682;7321;7324;8697;8881;8900;996	298;185;179;85;822;808;496;755;599;196;1944;147;193;597;620;465;830	0	6	1	17	6	149	4	92	496	9219	264	17
NA	120376	BMP7/BMPR2/BMPR1A-1B	655;658;659	431;502;1038	0	0	0	3	0	12	0	1	502	1971	16	3
NA	524531	G protein complex (HDAC4; GNB1; GNG2)	2782;54331;9759	340;71;1084	0	1	0	0	1	16	0	4	340	1495	21	3
NA	529773	Chromosomal passenger complex CPC (CDCA8; AURKB; BIRC5)	332;55143;9212	165;280;344	0	0	1	3	11	41	1	11	280	789	55	3
NA	525563	SNARE complex (VAMP2; SNAP25; STX1a; CPLX1)	10815;6616;6804;6844	134;206;288;116	0	1	0	0	2.5	9	0	4	170	744	14	4
NA	522523	ETS2-FOS-JUN complex	2114;2353;3725	469;380;331	0	3	1	3	8	28	1	2	380	1180	36	3
NA	27284	Activated Rac1:PI3K alpha	5290;5295;998	1068;724;191	1	3	3	17	1	7	0	6	724	1983	33	3
NA	64354	Plexin-A:Fyn:FARP2	2534;55558;9855	537;1871;1054	0	1	4	14	8	20	0	1	1054	3462	36	3
NA	526777	TFIIIC containing-TOP1-SUB1 complex	10923;2975;2976;7150;9328;9329;9330	127;2109;911;765;526;822;886	0	5	1	12	8	59	7	57	822	6146	133	7
NA	527530	TRF-Rap1 complex I; 2MD	25913;26277;54386;7013;7014;8658	634;451;399;439;500;1327	0	4	0	3	6	34	2	13	475.5	3750	54	6
NA	167784	PIP2/AP180/AP2/EPSIN	1173;160;29924;8301	435;977;662;652	0	1	0.5	3	8	34	7	29	657	2726	67	4
NA	129595	BMP7/BMPR2/BMPR1A-1B/FS	10468;655;658;659	344;431;502;1038	0	0	0	3	0	12	0	1	466.5	2315	16	4
NA	3880	RPA heterotrimer	6117;6118;6119	616;270;121	0	4	2	4	5	20	4	24	270	1007	52	3
NA	531786	Respiratory chain complex I (holoenzyme); mitochondrial	374291;4535;4695;4700;4704;4712;4720;4722;4724;4725;4729	213;318;99;154;377;128;463;264;175;106;249	0	1	0	1	0	11	1	18	213	2546	31	11
NA	525231	PKC-alpha-PLD1-PLC-gamma-2 signaling complex; lacritin stimulated	5336;5337;5578	1265;1074;672	0	4	4	23	8	22	2	6	1074	3011	55	3
NA	36720	NRGs/EGFLs:p-ERBB4:p-ERBB2:GRB2:SOS1	2064;2066;2885;6654;9542	1255;1308;217;1333;858	0	6	5	41	2	29	2	15	1255	4971	91	5
NA	29717	NMDA receptor complex	10142;1742;2902;2906;4747;815;817;88	3907;767;938;1336;543;489;499;894	0	1	1	19	5	57	1	12	830.5	9373	89	8
NA	258107	CDKN1A forms a complex with SET and GAPDH	1026;2597;6418	164;335;290	4	18	1	5	8	29	7	31	290	789	83	3
NA	132573	Syndecan-3/AgRP/MC4R	181;4160;9672	132;332;442	0	0	0	1	0	3	0	0	332	906	4	3
NA	534074	TFTC complex (TATA-binding protein-free TAF-II-containing complex)	10474;10629;23450;2648;27097;6314;6873;6874;6877;6878;6879;6880;6881;6883;6884;8295;8464	432;622;1217;837;589;945;1199;1085;800;677;349;264;218;161;124;3830;317	0	9	0	5	1	56	1	33	622	13666	103	17
NA	169726	Cargo/Importin-alpha/Ran/GTP/Importin-beta	3837;3838;5901	876;529;216	3	9	3	6	5	16	10	30	529	1621	61	3
NA	118080	SAA1/TLR2/TLR1	6288;6289;7096;7097	122;122;786;784	0	0	0	0	0	0	0	0	453	1814	0	4
NA	123983	ABI1/N-WASP	10006;142685;8976	508;588;505	0	2	2	11	2	29	0	0	508	1601	42	3
NA	169158	G-alpha-I/G-gamma/G-beta	2770;2782;2792	354;340;74	0	0	0	1	0	1	4	12	340	768	14	3
NA	38880	Sema4D:pPlexin-B1:Met	10507;4233;5364	862;1408;2135	0	0	2	13	2	17	0	10	1408	4405	40	3
NA	119822	TGFB/TGFBR2/TGFBR1/PML/SARA/SMAD2-3/AP2B2	4087;5371;7043;7046;7048;9372	467;882;412;503;592;1425	0	6	1	8	10.5	65	0	9	547.5	4281	88	6
NA	60921	Growth Hormone: Tyrosine phosphorylated Growth Hormone Receptor-p(Y1007)-JAK2 dimer:SOCS	1442;2688;2690;3717;9021	256;217;638;1132;225	0	0	2	23	1	6	0	1	256	2468	30	5
NA	529948	Ubiquitin ligase complex (TRAF6; TAB2; MALT1; UEV1A; BCL10)	10892;23118;387521;387522;7189;7335;8915	824;693;270;370;522;170;233	0	2	0	3	2	23	0	15	370	3082	43	7
NA	249432	IRAK1 forms a complex with IL1R1;IL1RAP and PIK3CG	3554;3556;3654;5294	569;570;712;1102	0	0	1	5	6	23	0	5	641	2953	33	4
NA	40963	Voltage-gated Calcium Channel; L-type 1.2	775;784;9254	2221;484;1145	0	0	2	7	0	6	0	1	1145	3850	14	3
NA	794778	SWI/SNF	57492;6595;6597;6598;6599;6601;6602;6605;6760;8289;86	2231;1590;1679;385;1105;1214;515;411;418;2285;429	1	26	2	19	9	132	5	61	1105	12262	238	11
NA	247964	IRF3 and CREBBP complex with the ISG15 promoter	1387;3661;9636	2442;427;165	0	18	0	5	13	33	1	4	427	3034	60	3
NA	249612	ITGAM and ITGB1 form a complex with LGALS3	3684;3688;3958	1152;801;250	0	0	4	8	3	10	0	7	801	2203	25	3
NA	203651	Notch	4851;4853;4854;4855	2555;2471;2321;2003	0	0	0	0	4	27	1	3	2396	9350	30	4
NA	199006	EPOR:JAK2:STAT3	2057;3717;6774	508;1132;770	0	3	9	31	1	8	0	9	770	2410	51	3
NA	524019	SMCC complex	10001;1024;51003;5469;892;9282;9412;9862	246;464;131;1581;283;1454;144;989	0	10	0	5	4	79	2	24	373.5	5292	118	8
NA	528125	Casein kinase II (beta-dimer; alpha;-dimer)	1459;1460;58496	350;215;201	1	2	2	5	5	14	1	4	215	766	25	3
NA	200633	Dock180:Rac	1793;5879;5880;5881	1865;211;192;192	0.5	4	1.5	6	1.5	9	4	16	201.5	2460	35	4
NA	49747	Integrin alphaIIbbeta3:Thrombospondin 1	3674;3690;7057	1039;788;1170	0	0	1	3	0	4	0	0	1039	2997	7	3
NA	190232	WNT3A;DKK1;MESDC2	22943;23184;89780	266;234;352	0	0	0	0	0	0	0	0	266	852	0	3
NA	127407	alphaM/beta2 Integrin/lipoprotein(a)	338;3684;3689;4018	4563;1152;769;2040	0	1	0	2	4	16	0.5	3	1596	8524	22	4
NA	132463	TAp73b (tetramer)/MDM2/TIP60	10524;4193;7161	546;497;636	3	6	2	6	6	50	1	9	546	1679	71	3
NA	529110	MTA1-HDAC core complex	3065;3066;5928;5931;9112	482;582;425;425;715	2	17	1	3	6	35	6	28	482	2629	83	5
NA	16329	NGF:p75NTR:NRAGE	4803;4804;9500	241;427;834	0	0	1	5	1	5	0	22	427	1502	32	3
NA	37503	Robo1:Slit2:KIAA1688	2817;6091;80728;9353	558;1651;1114;1529	0	0	2.5	12	5.5	25	0	1	1321.5	4852	38	4
NA	253772	BIRC4 forms a complex with CASP7; CASP9; and APAF1	317;331;840;842	1248;497;336;416	0	0	0.5	2	4.5	20	1	9	456.5	2497	31	4
NA	526067	Chromatin assembly complex (CAF-1 complex)	10036;5928;8208	956;425;559	1	3	0	1	21	57	2	11	559	1940	72	3
NA	131325	G beta/gamma/RACK1	10399;2782;54331	317;340;71	0	1	0	5	1	6	4	17	317	728	29	3
NA	246169	NFKB2(p52); RELA; and REL form a complex with IL8 promoter	3576;4791;5966;5970	99;900;619;551	0	7	1	6	8	30	0	3	585	2169	46	4
NA	796496	MLL3/4-COMPASS.complex	11091;22976;23054;58508;5929;7403;84661;9070;9757	334;1069;2063;4911;538;1401;99;628;2715	1	18	0	7	3	64	1	10	1069	13758	99	9
NA	527501	TIM (TIMM17ab; TIMM23; TIMM44) complex; mitochondrial	100287932;10245;10440;10469	209;172;171;452	0	0	0	0	0	0	1.5	9	190.5	1004	9	4
NA	170310	c-Myc mRNA/eIF-4G (dimer)/eIF-3/eIF-4E/eIF-4A/PTB	1973;1977;1981;1982;58155;8661;8672	406;248;1599;907;531;1382;1585	1	13	1	9	9	67	4	48	907	6658	137	7
NA	126535	CD40/CD40L (trimer)/TRAF6	7189;958;959	522;277;261	0	0	0	2	1	3	0	2	277	1060	7	3
NA	527295	TNF-alpha/Nf-kappa B signaling complex (RPL6; RPL30; RPS13; CHUK; DDX3X; NFKB2; NFKBIB; REL; IKBKG; NFKB1; MAP3K8; RELB; GLG1; NFKBIA; RELA; TNIP2; GTF2I)	1147;1326;1654;2734;2969;4790;4791;4792;4793;5966;5970;5971;6128;6156;6207;79155;8517	745;467;662;1203;998;969;900;317;356;619;551;579;288;115;151;429;487	0	20	2	36	6	150	4	68	551	9836	274	17
NA	203446	cytokine receptor:Grb2	1271;1438;1439;1441;2057;23765;2690;2885;3454;3455;3459;3460;3554;3556;3559;3560;3561;3563;3566;3568;3570;3572;3575;3577;3579;3581;3587;3588;3594;3595;3597;3598;3601;3953;3977;4352;5618;7850;8809;9180	372;434;897;863;508;866;638;217;557;515;489;337;569;570;272;551;369;378;825;420;468;918;459;350;360;521;578;325;662;862;427;380;267;1165;1097;635;622;398;541;979	0	5	1	98	1	70	0	22	518	22661	195	40
NA	21994	LH receptor:LH	1081;3972;3973	116;141;699	0	0	0	0	0	1	0	0	141	956	1	3
NA	28283	PP2B complex	116143;5533;5534;805	357;512;170;149	0	4	0.5	3	1	7	3.5	11	263.5	1188	25	4
NA	124896	Telomerase/911	10728;1736;3320;3364;5810;5883;7015	160;514;854;280;282;391;1132	0	31	1	13	6	50	2	44	391	3613	138	7
NA	132143	TRAIL/TRAILR1/FADD/TRADD/RIP/TRAF2	7186;8717;8737;8743;8772;8797	501;312;671;281;208;468	0	0	0	3	3	20	1.5	17	390	2441	40	6
NA	129251	RPA/ATR/ATRIP/RAD17/RFC2-5/9-1-1/TopBP1/CEP164/TIMELESS/TIPIN/CLASPIN/CHK1	11073;1111;22897;3364;545;54962;5810;5883;5884;5982;5983;5984;5985;6117;6118;63967;84126;8914	1522;476;1460;280;2644;301;282;391;681;354;356;363;340;616;270;1339;791;1208	0	13	0	17	5	138	2	69	433.5	13674	237	18
NA	245868	KLRC1 and KLRD1 forms a complex with HLA-E	3133;3821;3824	358;233;179	0	0	0	2	0	0	0	6	233	770	8	3
NA	525941	eNOS-HSP90-AKT complex; VEGF induced	207;3320;4846	480;854;1203	0	24	5	17	9	33	4	37	854	2537	111	3
NA	116461	IL2/IL2R alpha/beta/gamma/JAK1/LCK/JAK3/PYK2	2185;3558;3559;3560;3561;3640;3716;3718;3932	1009;153;272;551;369;131;1154;1124;509	0	1	4	35	2	54	0	12	509	5272	102	9
NA	168029	FAS/DAXX/FADD/Caspase 10/FAS L	1616;355;356;843;8772	752;335;281;522;208	0	1	1	9	3	36	0	9	335	2098	55	5
NA	5683	Prefoldin-associated actin/tubulin	10471;5201;5202;5203;5204;7411;7278	129;122;154;134;154;197;450	1	12	1	11	0	9	3	32	154	1340	64	7
NA	63072	SREBF:NFY:DNA	4800;4801;4802;6720	347;207;354;1177	0	2	0.5	2	1	13	1.5	13	350.5	2085	30	4
NA	22837	activated TLR9:PI3K class III	11344;30849;5289;54106	349;1358;887;1032	0.5	3	1	5	9.5	37	1	15	959.5	3626	60	4
NA	45192	EGF:p-6Y-EGFR:p-Y371-CBL:GRB2:CIN85:Endophilin	1950;1956;2885;30011;6456;867	1207;1210;217;665;352;906	0.5	8	3	33	6.5	65	0	23	785.5	4557	129	6
NA	531813	SNARE complex (RINT1; ZW10; p31)	5714;60561;9183	350;792;779	0	1	0	2	1	4	3	15	779	1921	22	3
NA	123007	HGF(dimer)/MET(dimer)/RANBP9/SOS1	10048;3082;4233;6654	729;728;1408;1333	0	1	1.5	14	9.5	33	1	12	1031	4198	60	4
NA	793938	BLM-CIII	116028;4292;641;7156;80010;80233	147;756;1417;1001;625;730	0	3	0	2	3	52	0	2	743	4676	59	6
NA	524783	FIB-associated protein complex	10419;2091;3276;708;7846;81027	637;321;371;282;451;451	1	13	1	20	1.5	15	8	44	411	2513	92	6
NA	524207	SRC-3 complex	10499;1147;1387;3551;6738;8202;8517	1464;745;2442;756;538;1424;487	2	30	1	11	13	94	1	18	756	7856	153	7
NA	34936	eEF1B complex	1933;1936;1937	225;647;437	3	10	2	4	9	23	7	22	437	1309	59	3
NA	116648	GRB2/SOS1/SHC	2885;6464;6654	217;584;1333	0	4	3	10	6	19	1	7	584	2134	40	3
NA	529023	JUND-FOSB-SMAD3-SMAD4 complex	2354;3727;4088;4089	338;347;425;552	1.5	8	0	0	5	21	0.5	4	386	1662	33	4
NA	12925	Processive complex loaded on telomere:ligated C-strand Okazaki fragments	10714;5111;5424;5425;57804	466;261;1107;469;107	1	8	1	6	2	18	4	29	466	2410	61	5
NA	126520	alpha6/beta4 Integrin/Laminin 1	284217;3655;3691;3912;3915	3075;1091;1822;1786;1609	0	0	1	18	5	73	4	27	1786	9383	118	5
NA	130076	alpha8/beta1 Integrin/Vitronectin	3688;7448;8516	801;478;1063	0	0	0	4	4	13	3	10	801	2342	27	3
NA	130110	TGFB/TGFBR2/TGFBR1/km23-1	7040;7046;7048;83658	390;503;592;96	0	0	0	4	5	21	2	8	446.5	1581	33	4
NA	526609	CAK-ERCC2 complex	1022;2068;4331;902	346;760;309;323	0	0	0	1	4.5	17	2	13	334.5	1738	31	4
NA	29549	Active TrkA receptor:FRS2 complex	10818;4803;4914	508;241;796	0	0	5	12	1	16	0	0	508	1545	28	3
NA	2289	LKB1:STRAD:MO25	55437;6794;81617	418;433;337	0	9	0	0	1	12	0	0	418	1188	21	3
NA	23868	ISG15:UBEIL/UbcH8:CEB1	51191;7318;9636	1024;1012;165	0	0	0	2	0	0	1	2	1012	2201	4	3
NA	31567	U1 snRNP	6625;6626;6628;6632;6633;6634;6635;6636;6637	437;282;240;119;118;126;92;86;76	0	7	0	4	1	20	3	28	119	1576	59	9
NA	35678	Exosome Complex	11340;118460;22894;23016;23404;51010;51013;5393;54512;56915	276;272;958;291;293;275;195;456;245;235	0	4	0	3	1	15	1	15	275.5	3496	37	10
NA	170484	IL-1-alpha/IL-1RI/IL-1RAcP/TOLLIP/MYD88/IRAKs	3552;3554;3556;3656;4615;54472	271;569;570;625;309;274	0	0	1	6	1	11	0	6	439	2618	23	6
NA	2730	TFIID	6872;6874;6875;6877;6878;6880;6881;6882;6883;6884;6908	1893;1085;862;800;677;264;218;211;161;124;339	0	2	0	6	1	35	0	5	339	6634	48	11
NA	530102	mSin3A complex	25942;3065;3066;5928;5931	1273;482;582;425;425	3	21	1	5	6	36	6	27	482	3187	89	5
NA	40052	L1:NUMB:CRMP-2:alpha-adaptin	160;1808;3897;8650	977;572;1257;651	0.5	2	2.5	10	13.5	52	1.5	7	814	3457	71	4
NA	795614	SRCAP	10467;10847;10856;55929;64431;6944;8089;86;8607	154;3230;463;467;396;364;227;429;456	1	8	0	6	1	32	2	36	429	6186	82	9
NA	244013	TNFRSF1A forms a complex with NUCB2 and ARTS1 (IDBG-34697)	4925;51752;7132	420;948;455	0	0	2	5	2	6	0	2	455	1823	13	3
NA	130232	NGF (dimer)/TRKA/NEDD4-2	23327;4803;4914	975;241;796	0	0	1	8	1	22	0	7	796	2012	37	3
NA	17062	CD28:Gads	2534;940;9402;942	537;220;330;329	0	1	3	17	1.5	13	0	0	329.5	1416	31	4
NA	61739	Activin:ACVR2A/B:ACVR1B	3626;91;92	352;505;513	0	0	0	1	0	0	0	1	505	1370	2	3
NA	168670	IFN-beta/IFNAR1/IFNAR2/JAK1/TYK2	3454;3455;3456;3716;7297	557;515;187;1154;1187	0	1	3	17	3	17	0	6	557	3600	41	5
NA	16494	Ubiquitinated NRIF	23421;6233;7311;7314;7316	177;156;128;229;685	3	16	1	4	4	20	8	36	177	1375	76	5
NA	122922	PDGF-BB/PDGFRB (dimer)/alphav/beta3 Integrin/Necl-5 (dimer)	1436;3685;3690;5155;5159	972;1048;788;241;1106	0	0	2	29	3	13	1	12	972	4155	54	5
NA	115514	Laminin 11	3911;3913;3915	3695;1798;1609	0	0	0	1	0	1	3	8	1798	7102	10	3
NA	30792	PPARG:RXRA:Corepressor Complex	5468;6256;8841;9611;9612	505;462;428;2440;2524	0	10	1	11	7	134	0	2	505	6359	157	5
NA	253456	FBXO44 forms a complex with SCF complex SKP1A; CUL1 and RBX1	6500;8454;93611;9978	163;776;255;108	0	1	0	0	1.5	5	3	14	209	1302	20	4
NA	524470	SMAD3-SKI-NCOR complex	4088;6497;9611	425;728;2440	2	7	0	4	10	58	1	3	728	3593	72	3
NA	528022	SMAD3-SMAD4-FOXO3 complex	2309;4088;4089	673;425;552	3	8	0	0	10	45	0	3	552	1650	56	3
NA	118153	SMAD3/SMAD4/RUNX2	4088;4089;860	425;552;521	3	8	0	0	10	28	1	4	521	1498	40	3
NA	7169	ubiquitinated Cdc6	6233;7311;7314;7316;990	156;128;229;685;560	3	19	1	4	4	23	8	38	229	1758	84	5
NA	63720	NR1D1 (REV-ERBA):heme:Corepressor	8841;9572;9611	428;614;2440	0	2	1	5	3	48	1	5	614	3482	60	3
NA	168730	AXIN/APC/beta-catenin	1499;5624;8312	781;461;862	0	3	4	14	11	33	0	13	781	2104	63	3
NA	14138	oligo-MyD88:Mal:activated TLR receptor	10333;114609;4615;7097	796;235;309;784	0	0	0.5	4	0	0	0	1	546.5	2124	5	4
NA	21632	Laminin-332	3909;3914;3918	3333;1172;1193	0	0	2	5	2	7	1	7	1193	5698	19	3
NA	532396	GIPC1-NTRK1-RGS19 complex	10287;10755;4914	217;333;796	0	0	2	10	0	8	1	6	333	1346	24	3
NA	243903	MYD88 forms a complex with IL1R1 and IL1RAP	3554;3556;4615	569;570;309	0	0	1	5	1	8	0	1	569	1448	14	3
NA	132118	Ron/MSP/14-3-3 family	4485;4486;7531	725;1400;255	0	4	1	7	1	7	2	15	725	2380	33	3
NA	794139	MMS22L-TONSL	11198;253714;4171;4173;4176;4796;6749	1047;1243;904;863;719;1378;709	2	20	3	17	12	82	10	77	904	6863	196	7
NA	533337	BRCA1 B complex	571;580;672	736;777;1884	0	2	0	1	13	69	2	5	777	3397	77	3
NA	40068	pL1 (S1152):p90rsk:clathrin-dynamin complex	1173;1175;1211;1213;161;163;3897;6196;6456	435;142;248;1675;939;951;1257;741;352	0	14	2	28	4	44	6	63	741	6740	149	9
NA	124499	PDGF-DD/PDGFRB (dimer)	1436;5159;80310	972;1106;370	0	0	9	26	1	6	1	6	972	2448	38	3
NA	124921	Ephrin B1/EPHB1-2/NCK1	1947;2048;4690	346;987;377	0	0	7	24	7	23	0	2	377	1710	49	3
NA	199341	(Grb2:Sos):FRS2_p	10817;10818;2885;6654;6655	492;508;217;1333;1332	0	4	3	17	1	29	0	6	508	3882	56	5
NA	528089	SMN complex (GEMIN2;5; SMN)	25929;8487;6606	1508;280;294	0	1	1	6	10	26	1	4	294	2082	37	3
NA	130597	Ephrin B/EPHB1/Src/Paxillin	1947;2047;5829;6714	346;984;591;536	0	0	7.5	30	7.5	51	0	2	563.5	2457	83	4
NA	120519	HIF1A/RACK1/Elongin B/Elongin C	10399;3091;6921;6923	317;826;112;161	1	5	0.5	6	2.5	12	7.5	31	239	1416	54	4
NA	124017	BMP9/BMPR2/Endoglin/ALK1 (dimer)/CK2B	1460;2022;2658;58496;659;94	215;658;429;201;1038;503	0	1	0	5	4.5	31	0	3	466	3044	40	6
NA	524293	TNF-alpha/NF-kappa B signaling complex 9	11140;1147;2289;3326;4793	378;745;457;724;356	0	18	1	12	4	27	4	54	457	2660	111	5
NA	528666	TCF4-CTNNB1-CREBBP complex	1387;1499;6925	2442;781;671	3	21	5	15	20	48	1	14	781	3894	98	3
NA	524624	TNF-alpha/NF-kappa B signaling complex 7	10454;11140;2289;23118;257397;3320;3326;6885	504;378;457;693;712;854;724;606	0	42	1.5	26	9	69	4	88	649.5	4928	225	8
NA	125029	Ephrin A1/EPHA4/VSM-RhoGEF	1942;2043;22899	205;986;841	0	0	1	6	1	2	0	1	841	2032	9	3
NA	9722	CstF	1477;1478;1479	431;577;717	0	0	1	4	3	14	2	7	577	1725	25	3
NA	43766	PP2A	5516;5519;5520	309;667;447	0	2	0	2	1	3	9	30	447	1423	37	3
NA	201099	JAK1:IFNalphaR:TYK2:STAT2:STAT1	3454;3455;3716;6772;6773;7297	557;515;1154;750;851;1187	0.5	5	3	22	2.5	18	1.5	17	800.5	5014	62	6
NA	169281	IL-1/IL-1R/MYD88/IRAK/TRAF6	3552;3554;3654;4615;7189	271;569;712;309;522	0	0	1	4	1	13	1	8	522	2383	25	5
NA	170531	SDF-1/CXCR4/g-alpha-q	2776;6387;7852	359;140;356	0	1	0	1	2	16	2	4	356	855	22	3
NA	20984	TRAF6:hp-IRAK1/or p-IRAK2:p-IRAK4:oligo-MyD88:activated TLR7/8 or 9	11344;3656;4615;51135;54106;7189	349;625;309;460;1032;522	0	4	1	5	0.5	14	0	3	491	3297	26	6
NA	524067	CAND1-CUL2-RBX1 complex	55832;8453;9978	1230;745;108	1	4	2	4	2	9	4	18	745	2083	35	3
NA	120587	HGF(dimer)/MET(dimer)/GAB1/N-WASP	142685;2549;3082;4233;8976	588;724;728;1408;505	0	2	2	28	2	31	0	10	724	3953	71	5
NA	114422	HSP60/TLR4/MD2 (dimer)	23643;3329;7099	160;573;839	0	23	2	5	3	8	0	19	573	1572	55	3
NA	2307	p-AMPK heterotrimer	5562;5565;5571	574;272;331	1	3	1	4	9	40	3	8	331	1177	55	3
NA	126197	BRCA1/CtBP/CtIP	1487;5932;672	440;897;1884	0	0	0	0	9	65	2	5	897	3221	70	3
NA	121145	Par3/Par6/Atypical PKCs	2151;50855;5584	374;346;596	0	0	1	6	2	25	0	1	374	1316	32	3
NA	795426	CNOT7-CNOT6	23019;25904;29883;4848;4849;55571;57472;85456;9125	2376;744;285;540;753;510;557;1729;299	0	1	0	14	2	121	1	22	557	7793	158	9
NA	120905	FANCD2/FANCI/FAN1	2177;22909;55215	1471;1017;1328	0	0	1	3	11	32	13	37	1328	3816	72	3
NA	119941	BMP2-4/BMPR2/BMPR1A-1B/RGM	285704;652;658;659	478;408;502;1038	0	0	0	3	0	12	0	1	490	2426	16	4
NA	130504	TGIF2/HDAC complex/SMAD3/SMAD4	4088;4089;60436	425;552;237	3	8	0	0	6	21	0	3	425	1214	32	3
NA	53031	eNOS:Caveolin-1:NOSTRIN:Dynamin-2	115677;1785;4846;857	506;870;1203;178	0.5	2	3	10	7	28	4.5	16	688	2757	56	4
NA	534044	EIF3 complex (EIF3A; EIF3B; EIF3G; EIF3I; EIF3C)	728689;8661;8662;8663;8666;8668	914;1382;814;913;320;325	1.5	16	2	9	13	65	11	77	863.5	4668	167	6
NA	532694	CTF18-cohesion-RFC complex	54921;5982;5983;5984;5985;63922;79075	121;354;356;363;340;975;393	0	5	0	1	1	19	5	23	356	2902	48	7
NA	120194	dNp63a (tetramer)/PP2A B56alpha/GSK3beta	2932;5525;8626	433;486;680	0	0	3	9	5	28	0	1	486	1599	38	3
NA	120622	E2/ERA (dimer)/TIF2/P72/SRA1	10011;10499;10521;2099	236;1464;731;595	4.5	17	1.5	8	12.5	52	1	5	663	3026	82	4
NA	526417	URI complex (Unconventional prefoldin RPB5 Interactor)	10856;26228;5202;5434;6500;6502;8454;8607;8725	463;295;154;210;163;424;776;456;535	0	4	0	4	1	22	5	49	424	3476	79	9
NA	120075	TCF4/beta catenin/TRRAP/SCF	1499;6500;6934;8295;8454;8945	781;163;596;3830;776;605	1.5	8	0.5	12	3.5	40	6.5	44	690.5	6751	104	6
NA	256772	BTRC forms a complex with NEDD8 conjugated CUL1 and SKP1A	4738;6500;8454;8945	81;163;776;605	0.5	2	0.5	2	0.5	3	6.5	21	384	1625	28	4
NA	253612	FBXO31 forms a complex with SKP1A; CUL1 and RBX1 (SCF complex)	6500;79791;8454;9978	163;539;776;108	0	1	0	0	2	8	3	14	351	1586	23	4
NA	128398	RELN/VLDLR/DAB1/Fyn	1600;2534;5649;7436	555;537;3460;873	0	1	3.5	17	1.5	14	0	1	714	5425	33	4
NA	522023	(C-CFTR)2-NHERF-ezrin complex	1080;7430;9368	1480;586;358	1	8	2	11	17	47	2	28	586	2424	94	3
NA	115530	Laminin 8	3910;3912;3915	1823;1786;1609	0	0	1	7	2	7	3	7	1786	5218	21	3
NA	528910	Wave-2 complex	10006;10163;10787;23191;55845	508;498;1134;1253;75	0	1	2	15	11	57	3	28	508	3468	101	5
NA	21469	LEFTY:EGF-CFC:NODAL Receptor	10637;130399;55997;55997;93	366;493;223;223;512	0	0	0	0	0	0	0	0	366	1817	0	5
NA	530346	CRMP-MICAL-PlexinA1 complex; induced by SEMA3A	1400;5361;64780	686;1896;1067	0	0	2	5	7	16	2	5	1067	3649	26	3
NA	926	EIF4F	1974;317649;8672	407;224;1585	1	3	0	1	1	10	2	10	407	2216	24	3
NA	129181	NFAT1-c-4/MAF/IRF4	3662;4094;4773	451;403;925	0	0	1	3	2	39	0	5	451	1779	47	3
NA	37427	Pak:Nck:Robo1:Slit2:Glypican	10298;2817;6091;8440;9353	591;558;1651;380;1529	0	2	2	13	3	31	0	2	591	4709	48	5
NA	44138	EGF:p-6Y-EGFR:SHC1	1950;1956;6464	1207;1210;584	0	3	3	20	6	39	1	18	1207	3001	80	3
NA	132537	BARD1/CSTF1/BRCA1	1477;580;672	431;777;1884	0	2	0	2	13	64	2	6	777	3092	74	3
NA	129558	Insulin Receptor/Insulin/IRS1/Shp2	3630;3643;3667;5781;723961	110;1382;1242;593;200	1	5	9	32	7	75	0	4	593	3527	116	5
NA	251435	KIR2DL4 forms a complex with PRKDC; KRT2; HNRNPA2B1; and KRT1	3181;3805;3848;3849;5591	353;377;644;639;4128	2	24	3	18	12	63	4	125	639	6141	230	5
NA	531717	ESR1-CDK7-CCNH-MNAT1-MTA1-HDAC2 complex	1022;2099;3066;4331;902;9112	346;595;582;309;323;715	0.5	11	1	6	7	55	2.5	17	464	2870	89	6
NA	39100	Sema3A:NRP-1:pPlexin-A:Fyn:Fes	10371;2242;2534;55558;8829	771;822;537;1871;923	0	1	2	18	2	23	0	5	822	4924	47	5
NA	116473	E2F4/DP2/p107-p130	1874;5933;7029	413;1068;386	0	1	0	1	3	23	1	2	413	1867	27	3
NA	529921	SNARE complex (VAMP3; VAMP4; STX16)	8674;8675;9341	141;325;100	0	0	0	1	4	11	1	5	141	566	17	3
NA	48534	SHC1:Phosphorylated ERBB2 heterodimers	2064;2065;6464;9542	1255;1342;584;858	0	0	7.5	27	4.5	23	0.5	8	1056.5	4039	58	4
NA	42984	Cyclin A:phospho-Cdk2(Thr160):phospho-E2F1/E2F2 complex	1017;1869;8900	298;437;465	1	4	0	5	6	13	0	12	437	1200	34	3
NA	20527	SNAPc	10302;6617;6618;6619;6621	98;368;334;411;1469	0	1	0	0	3	15	0	4	368	2680	20	5
NA	29679	Active TrkA:Phospho-ARMS:Crk:C3G:Rap1:Phospho-B-Raf complex	1398;2889;4803;4914;57498;5906;673	304;1095;241;796;1771;184;766	0	1	4	23	7	70	0	3	766	5157	97	7
NA	54639	p(Y700;731;774)-CBL:CRK:RAPGEF1	1398;2889;867	304;1095;906	0	1	6	20	9	27	0	0	906	2305	48	3
NA	528315	Notch1-p56lck-PI3K complex	3932;4851;5295	509;2555;724	1	2	3	16	7	24	0	1	724	3788	43	3
NA	117060	RET9/GFRalpha1/GDNF/Enigma	2668;2674;5979;9260	228;465;1114;457	0	0	0.5	18	1	6	0	0	461	2264	24	4
NA	118585	Calcineurin	5530;5532;5533	521;525;512	0	0	0	0	1	2	4	12	521	1558	14	3
NA	121461	BMP2-4/BMPR2/BMPR1A-1B/RGM/SMAD7/SMURF1	148738;4092;57154;650;657;659	426;426;757;396;532;1038	0	2	0	4	1	18	0	1	479	3575	25	6
NA	132505	IL27R/JAK2/TYK2	3572;3717;7297;9466	918;1132;1187;636	0	0	7	30	1.5	14	0	1	1025	3873	45	4
NA	125285	TSC1/TSC2/14-3-3 family	7248;7249;7531	1164;1807;255	0	4	2	6	12	53	5	20	1164	3226	83	3
NA	19728	viral dsRNA:TLR3:TRIF:p-TBK1/p-IKKE	148022;29110;7098	712;729;904	0	1	2	4	2	8	1	9	729	2345	22	3
NA	115287	IL2/IL2R alpha/beta/gamma/JAK1/LCK/JAK3/SHC	3558;3559;3560;3561;3640;3716;3718;3932;6464	153;272;551;369;131;1154;1124;509;584	0	1	3	25	2	33	0	11	509	4847	70	9
NA	533098	ARC complex	10001;1024;51586;5469;81857;892;9282;9412;9439;9440;9441;9443;9862;9968;9969	246;464;788;1581;747;283;1454;144;1368;651;600;233;989;2177;2174	0	11	0	9	6	125	2	56	747	13899	201	15
NA	529189	NDPKA-AMPKalpha1 complex	4830;4831;5562;654364	177;152;574;267	4.5	17	1	6	4.5	41	5	21	222	1170	85	4
NA	17841	Integrin alpha4beta7:MADCAM1	3676;3695;8174	1032;798;382	0	0	1	4	3	6	2	10	798	2212	20	3
NA	130379	alphaM/beta2 Integrin/CD40L	3684;3689;959	1152;769;261	0	0	0	0	3	9	0	1	769	2182	10	3
NA	523624	FAS-FADD-CASP8 complex	355;841;8772	335;538;208	0	1	3	6	5	14	3	6	335	1081	27	3
NA	29085	Fyn:NCAM1:RPTP-alpha	2534;4684;5786;64601;6708;6712	537;858;802;839;2419;2390	0	2	4.5	26	3.5	24	0.5	8	848.5	7845	60	6
NA	54583	Interleukin receptor complexes with activated SHC1:SHIP1;2	3558;3559;3560;3561;3636;3640;3716;3718;6464	153;272;551;369;1258;131;1154;1124;584	0	0	4	33	2	34	1	16	551	5596	83	9
NA	525482	Anti-SMN protein complex	11218;50628;6628;8487;6606	824;1058;240;280;294	0	3	1	7	2	33	1	11	294	2696	54	5
NA	123697	TRAIL/TRAILR2/FADD/TRADD/RIP/TRAF2	7186;8717;8737;8743;8772;8795	501;312;671;281;208;440	0	0	0	3	3	17	1	16	376	2413	36	6
NA	21229	P2RY11 :ATP	5032;56342;692312	374;473;794	0	0	0	0	6	13	0	0	473	1641	13	3
NA	120184	E2/ER alpha (dimer)/PELP1/Src/p52 SHC/GRB2/SOS1	2099;27043;2885;6464;6654;6714	595;1130;217;584;1333;536	0	12	3	21	11.5	63	1	9	589.5	4395	105	6
NA	171112	SUMO1/SAE1/SAE2	10054;10055;7341	640;346;101	1	7	0	1	3	11	9	25	346	1087	44	3
NA	129005	ARF1/GTP/Membrin/GBF1/p115	375;8615;8729;9570	181;962;1859;213	0.5	3	1.5	6	3	27	4	13	587.5	3215	49	4
NA	254291	IRF1 and IRF9 complex with the CXCL10 promoter	10379;3627;3659	393;98;325	0	0	0	1	0	0	0	0	325	816	1	3
NA	528405	CTF18-CTF8-DCC1 complex	54921;63922;79075	121;975;393	0	0	0	0	0	13	1	2	393	1489	15	3
NA	48549	GRB2:SOS1:p-Y349;350-SHC1:Phosphorylated ERBB2 heterodimers	2064;2065;2885;6464;6654;9542	1255;1342;217;584;1333;858	0	4	4	34	4.5	36	0.5	14	1056.5	5589	88	6
NA	171753	IL-10/IL-10R/JAK1	3586;3587;3588;3716	178;578;325;1154	0	0	1	6	1	8	0	5	451.5	2235	19	4
NA	127085	ErbB2/ErbB3/neuregulin 2	2064;2065;9542	1255;1342;858	0	0	12	24	3	17	0	7	1255	3455	48	3
NA	28482	TARP-PSD95-Mdm2	10369;1742;4193	323;767;497	0	0	3	13	4	45	0	7	497	1587	65	3
NA	44663	Activated FGFR:p-FRS2alpha:p-CBL:GRB2	10818;2249;2261;2885;5781;867	508;206;806;217;593;906	0.5	7	6	36	5.5	39	0	7	550.5	3236	89	6
NA	527759	WIP-WASp-actin-myosin-IIa complex	10627;4627;4637;59;7454;7456	171;1960;151;377;502;503	1	26	2	18	6.5	38	5	45	439.5	3664	127	6
NA	116368	alpha6/beta1 Integrin/Laminin 11	3655;3688;3911;3913;3915	1091;801;3695;1798;1609	0	0	1	6	1	25	4	20	1609	8994	51	5
NA	523636	MICA-KLRK1-HCST complex	100507436;10870;22914	383;92;216	0	0	1	2	0	1	0	0	216	691	3	3
NA	133336	E-cadherin/beta catenin/alpha catenin/alpha E/beta7 Integrin	1499;3682;3695;999	781;1179;798;882	0	3	3.5	19	8	38	5	23	840	3640	83	4
NA	526824	DNA synthesome complex (15 subunits)	10714;23649;3978;5111;54107;5422;5424;5425;5426;5427;5557;5558;56655;57804;5981	466;598;919;261;147;1462;1107;469;2286;527;420;509;117;107;1147	0	11	1	18	4	103	4	82	509	10542	214	15
NA	521816	E2F-6 complex	10138;10919;1876;23269;2707;4149;6015;6045;7027;79813;83746;84108	180;1210;281;2856;270;160;406;336;410;1298;705;350	0	6	0	4	5.5	81	2	29	378	8462	120	12
NA	530369	MLL-HCF complex	11091;3053;3054;4221;4297;5929;9070	334;499;2035;615;3969;538;628	1	11	0	7	5	110	1	21	615	8618	149	7
NA	521704	PBAF complex (Polybromo- and BAF containing complex)	196528;55193;6597;6598;6599;6601;6602;6603;6605;86	1835;1602;1679;385;1105;1214;515;531;411;429	0	11	1	16	7	106	6.5	70	818	9706	203	10
NA	521774	TIN2 complex	25913;26277;65057;7014	634;451;544;500	0	4	0	0	4	14	1	5	522	2129	23	4
NA	795455	NuRD.1	1108;3065;3066;57504;5928;5931;9112	1912;482;582;515;425;425;715	2	26	1	7	6	79	6	42	515	5056	154	7
NA	524055	CAND1-CUL4A-RBX1 complex	55832;8451;9978	1230;759;108	2	5	1	3	3	11	3	17	759	2097	36	3
NA	115895	VEGFR2 (dimer)/VEGFA (dimer)/VE-cadherin/beta catenin/alpha catenin	1003;1495;1499;3791;7422	784;906;781;1356;412	3	10	6	27	4	41	0	27	784	4239	105	5
NA	17916	HLA-E interacting with NKG2A-CD94 heterdimer	3133;3821;3824;567	358;233;179;119	0	0	0	2	0	0	0	6	206	889	8	4
NA	61051	pSIRP-A:Grb2	140885;2885;961	504;217;323	0	4	4	9	0	1	3	10	323	1044	24	3
NA	525779	Kinase-scaffold-phosphatase complex; PKA-AKAP79-CaN	5530;5576;9495	521;404;427	0	0	0	2	2	11	4	9	427	1352	22	3
NA	168344	IFN-alpha/IFNAR1/IFNAR2/JAK1/TYK2	3439;3447;3454;3455;3716;7297	189;190;557;515;1154;1187	0	2	3	17	2.5	19	0	6	536	3792	44	6
NA	171781	PA700 lid	10213;5709;5717;5718	310;534;422;456	1	5	1	6	1.5	9	12	44	439	1722	64	4
NA	120435	Sortilin/TRAF6/NRIF	10782;6272;7189	653;831;522	0	0	0	2	0	1	0	2	653	2006	5	3
NA	60448	IL2:IL2R trimer:JAK1:JAK3	3558;3559;3560;3561;3640;3716;3718	153;272;551;369;131;1154;1124	0	0	4	19	2	16	0	10	369	3754	45	7
NA	129969	SMAD3/SMAD4/VDR	4088;4089;7421	425;552;427	3	8	0	0	5	20	1	4	427	1404	32	3
NA	167822	D2/GRK2/NCS-1	156;1813;23413	689;443;190	0	0	1	4	8	16	2	6	443	1322	26	3
NA	527218	SCAMP1-SCAMP2-SCAMP3 complex	10066;10067;9522	329;347;338	0	0	2	7	2	6	6	13	338	1014	26	3
NA	257783	CDH1 forms a complex with MYO6 and VCL	4646;7414;999	1285;1134;882	1	4	4	12	13	33	12	29	1134	3301	78	3
NA	523504	eRF1-eRF3-GTP-Mg(2+) complex	2107;23708;2935	437;628;637	5	11	0	0	1	3	4	9	628	1702	23	3
NA	531674	SH3KBP1-CBLB-EGFR complex	1956;30011;868	1210;665;982	0	3	4	20	18	59	0	17	982	2857	99	3
NA	524518	BHC110 complex	10362;23028;23186;23199;3065;3066;51317;7750;7764;9658	317;876;482;1217;482;582;680;1377;1048;1163	0.5	16	1	14	5.5	73	0	27	778	8224	130	10
NA	121504	EGFR/EGFR/EGF/EGF/GRB2/N-WASP	142685;1950;1956;2885;8976	588;1207;1210;217;505	2	9	2	25	1	36	0	23	588	3727	93	5
NA	21075	TRAF6:p-3S;3T-IRAK1:p-S;2T-IRAK4:oligo-MyD88:activated TLR7/8 or 9	11344;3654;4615;51135;54106;7189	349;712;309;460;1032;522	0	4	1	5	1	23	0.5	8	491	3384	40	6
NA	60955	Growth Hormone: Tyrosine phosphorylated Growth Hormone Receptor-p(Y1007)-JAK2 dimer:SHP1	1442;2688;2690;3717;5777	256;217;638;1132;624	0	1	5	31	1	7	0	3	624	2867	42	5
NA	203825	Jagged1:Notch1	182;4851;4853;4854;4855	1218;2555;2471;2321;2003	0	0	0	2	1	27	1	4	2321	10568	33	5
NA	115722	Ephrin B/EPHB2/RasGAP	1949;2048;5921	340;987;1047	0	0	4	19	0	14	0	0	987	2374	33	3
NA	30107	PDGF:Phospho-PDGF receptor dimer:SHP2	1436;5154;5159;5781	972;211;1106;593	0	2	9	34	3	13	1	6	782.5	2882	55	4
NA	41370	NGF:p75NTR:RIP2	4803;4804;8767	241;427;540	0	0	1	4	4	23	0	3	427	1208	30	3
NA	42755	pyruvate dehydrogenase complex	1737;1738;5160;5162;8050	647;509;390;359;501	1	14	0	5	2	10	1	11	501	2406	40	5
NA	132981	p47 Phox/p67 Phox/cytochrome b-245/RAC1/GTP	1535;1536;4688;5879;653361	195;570;526;211;390	0	0	0	5	2	22	1	13	390	1892	40	5
NA	18305	HLA-C group 2 interacting with KIR2DS1	3107;3803;3806;3808;3810;567;7305	366;348;304;304;304;119;113	0	0	2	14	0	0	0	3	304	1858	17	7
NA	527123	COP9 signalosome complex	10920;10980;10987;2873;50813;51138;64708;8533;9318	209;327;334;527;275;406;264;423;450	0	4	1	13	1	13	5	51	334	3215	81	9
NA	6895	Mcm10:active pre-replicative complex	23594;23595;4171;4172;4173;4174;4175;4176;4998;4999;5000;5001;55388;84515;990	252;712;904;808;863;734;821;719;861;577;436;435;875;840;560	0	16	1	20	4	127	6	113	734	10397	276	15
NA	172264	RNA POL I/rRNA TFs	25885;51082;84172;9533	1720;133;1135;346	0	0	0.5	4	2	9	6	29	740.5	3334	42	4
NA	9770	Mature Intronless transcript derived Histone mRNA:SLBP:CBP80:CBP20	22916;4686;7884	156;790;270	1	3	0	1	6	18	1	3	270	1216	25	3
NA	128197	FANCD2/FANCI/BRCA2/PALB2	2177;55215;675;79728	1471;1328;3418;1186	0	1	1	4	12	51	7	38	1399.5	7403	94	4
NA	130604	TXA2/TP beta/beta Arrestin3/RAB11/GDP	407;6915;8766	388;407;216	0	0	0	2	3	9	0	3	388	1011	14	3
NA	525524	TFIIH transcription factor complex (ERCC2; ERCC3; GTF2H1; CDK7; CCNH; GTF2H2)	1022;2068;2071;2965;2966;902	346;760;782;548;395;323	0	0	0.5	4	2	18	3.5	22	471.5	3154	44	6
NA	240337	IKBKB forms a complex with CUEDC2; PPP1CA and PPP1R15A (GADD34)	23645;3551;5499;79004	674;756;341;287	0.5	2	1	5	1.5	22	4.5	18	507.5	2058	47	4
NA	794229	XFIM	23028;3066;9203;9569	876;582;1370;959	1	4	1	5	8	33	5	22	917.5	3787	64	4
NA	5660	Prefoldin	10471;5201;5202;5203;5204;7411	129;122;154;134;154;197	0.5	5	0.5	3	0	1	2.5	20	144	890	29	6
NA	201044	Hh:Cdo/Boc	3549;50846;50937;6469;91653	411;396;1264;462;1114	0	0	0	0	0	0	0	0	462	3647	0	5
NA	56308	Grb2 bound to Tie2	284;2885;7010	498;217;1124	1	5	5	11	1	2	0	6	498	1839	24	3
NA	523861	IMP3-IMP4-MPP10 complex	10199;55272;92856	681;184;291	0	1	1	4	2	16	1	3	291	1156	24	3
NA	204861	TLR4:MyD88:IRAK-4	4615;51135;7099	309;460;839	0	2	1	4	3	14	0	1	460	1608	21	3
NA	528731	Chromosomal passenger complex CPC (INCENP; BIRC5; AURKB)	332;3619;9212	165;918;344	0	2	2	5	11	93	3	13	344	1427	113	3
NA	523401	BLM complex II	6117;6118;6119;641;7156;80010	616;270;121;1417;1001;625	0	7	0.5	5	4	65	1.5	26	620.5	4050	103	6
NA	117945	TCR/CD3/MHC I/CD8/LCK	3105;3932;567;915;916;917;919;925;926	365;509;119;171;207;182;164;235;210	0	1	2	18	1	24	0	8	207	2162	51	9
NA	36868	Activated FGFR:p-FRS2alpha:GRB2:GAB1:PI3KR1	10818;2247;2261;2549;2885;5295	508;288;806;724;217;724	0.5	10	6	44	5	44	0	6	616	3267	104	6
NA	170829	GABA receptor/GABARAP/NSF/PLIC-1/PLIC-1	11337;2554;2555;2556;2557;2558;2559;29979;4905	117;456;451;492;554;462;453;589;744	0	1	1	8	1	8	0	9	462	4318	26	9
NA	20451	TFIIIC:TFIIIA:Type I Promoter Complex	2971;2975;2976;9328;9329;9330	365;2109;911;526;822;886	0	2	0.5	8	1.5	37	7	37	854	5619	84	6
NA	8746	IFNAR2:JAK1:STAT2	3455;3716;6773	515;1154;851	1	3	3	9	3	10	2	7	851	2520	29	3
NA	524279	tRNA splicing endonuclease	10978;116461;283989;79042;80746	425;171;526;310;465	0	0	0	0	3	18	1	8	425	1897	26	5
NA	119886	CD40/CD40L (trimer)/TTRAP	51567;958;959	362;277;261	0	0	0	5	2	5	0	6	277	900	16	3
NA	122035	VEGFR2 (dimer)/VEGFA (dimer)/IQGAP1	3791;7422;8826	1356;412;1657	0	4	7	20	4	13	0	21	1356	3425	58	3
NA	194280	IRAK1;IRAK4;PELI1	3654;51135;57162	712;460;418	0	2	0	1	10	31	3	8	460	1590	42	3
NA	240988	MAP2K4 forms a complex with MAPK10 (JNK3) and ARRB2	409;5602;6416	409;464;399	1	4	1	3	7	16	2	4	409	1272	27	3
NA	124357	alphaIIb/beta3 Integrin/Vitronectin	3674;3690;7448	1039;788;478	0	0	1	3	4	12	0	0	788	2305	15	3
NA	794549	MHF1	116028;1325;201254;2175;2187;2188;378708;55120;57697;641;7156;80010;80233;91442	147;105;63;1455;859;374;138;380;2048;1417;1001;625;730;215	0	3	0	4	1.5	58	0	16	502.5	9557	81	14
NA	28176	(Gi alpha1:GDP:Adenylate cyclase):(G alpha-olf:GDP)	196883;2773;2774	1077;354;458	0	0	1	4	0	0	4	12	458	1889	16	3
NA	168019	fMLP/FPR1/G-beta/G-gamma/G16-alpha	2357;2769;2782;2792	350;374;340;74	0	0	0.5	2	1	13	0	4	345	1138	19	4
NA	172519	eIF4F/mRNA	1973;1974;1977;1981;1982;8672	406;407;248;1599;907;1585	1.5	12	1	7	6.5	54	5.5	37	657	5152	110	6
NA	769	ISG15:UBCH8:ISG15 E3 ligase	25820;9246;9636	557;153;165	0	1	0	0	0	0	1	13	165	875	14	3
NA	38577	CBL:Grb2/p-APS:p-c-Kit complex	2885;3815;4254;6654;867	217;976;273;1333;906	0	5	5	31	6	30	0	8	906	3705	74	5
NA	120506	HIF1A/ARNT/Cbp/p300/Src-1	1387;3091;405;8648	2442;826;789;1441	1.5	21	0.5	6	13.5	53	0.5	15	1133.5	5498	95	4
NA	794344	BRCA	10933;672;675;79728;9643	362;1884;3418;1186;288	0	2	0	5	6	74	1	15	1186	7138	96	5
NA	123903	TNF-alpha/TNFR2 (cleaved)/TRAF1/TRAF2	7124;7133;7185;7186	233;461;416;501	0	0	0	0	2.5	11	1.5	11	438.5	1611	22	4
NA	523410	FA complex (Fanconi anemia complex)	2175;2176;2178;2187;2188;2189;55120;6117;641;7156;7415;80010	1455;558;536;859;374;622;380;616;1417;1001;806;625	0	27	0	13	3	114	1	68	623.5	9249	222	12
NA	528649	LINC complex; S-phase	132660;286826;4605;55957;5928;5933;91750	749;558;700;246;425;1068;116	0	6	0	3	10	77	0	4	558	3862	90	7
NA	794933	NAT	10001;10025;1024;84246;892;9282;9412;9439;9440;9443;9477;9862;9968	246;877;464;135;283;1454;144;1368;651;233;212;989;2177	0	2	0	3	2	45	3	62	464	9233	112	13
NA	123724	MRP8/MRP14/TLR4/MD2 (dimer)/MYD88/TIRAP	114609;23643;4615;6279;6280;7099	235;160;309;93;114;839	0	0	0.5	6	0	4	0	1	197.5	1750	11	6
NA	133083	RXRs/RARs/SMRT(N-CoR2)/9cRA	5916;6258;9612	454;463;2524	0	8	0	5	2	82	0	0	463	3441	95	3
NA	64006	U7 snRNP-specific Sm core complex	134353;6628;6634;6635;6636;6637;84967	360;240;126;92;86;76;123	0	4	0	1	0	8	3	14	123	1103	27	7
NA	121499	GRB2/N-WASP	142685;2885;8976	588;217;505	2	6	2	8	1	3	0	6	505	1310	23	3
NA	204703	smad2:smurf2:SnoN	4087;64750;6498	467;748;684	0	4	0	1	1	15	0	6	684	1899	26	3
NA	172727	MHC II/TCR-CD3	3122;3123;915;916;917;919	254;266;171;207;182;164	0	0	2	14	0.5	6	0	5	194.5	1244	25	6
NA	521380	PPP3CA-PPP3CA-RCAN1 complex	1827;5530;5532	252;521;525	0	0	0	1	1	4	3	8	521	1298	13	3
NA	650	phospho-Cdh1:phospho-APC/C complex	10393;11065;246184;29882;29945;51343;51433;51434;51529;64682;7321;7324;8697;8881;996	185;179;85;822;808;496;755;599;196;1944;147;193;597;620;830	0	5	1	12	7	143	4	80	597	8456	240	15
NA	41077	GLP-1: GLP-1R: Heterotrimeric G(s): GTP	2641;2740;2778;2783;2790;548645;552891	180;463;1037;340;68;360;153	0	0	0	3	0	3	0	19	340	2601	25	7
NA	169223	XIAP/cIAP1/cIAP	329;330;331	618;604;497	0	0	0	1	2	7	7	21	604	1719	29	3
NA	524677	TIP60 histone acetylase complex	10524;10856;8295;86;8607	546;463;3830;429;456	2	8	1	6	2	18	9	45	463	5724	77	5
NA	55783	factor XI:GPIb:GPIX:GPV complex	2160;2811;2812;2814;2815	625;639;206;560;177	0	1	0	5	2	10	0	0	560	2207	16	5
NA	526711	Tankyrin 1-tankyrin 2-TRF1 complex	7013;80351;8658	439;1166;1327	0	0	0	2	9	19	2	8	1166	2932	29	3
NA	131372	alpha3/beta1 Integrin/Laminin 1	284217;3675;3688;3912;3915	3075;1051;801;1786;1609	0	0	1	6	2	12	3	15	1609	8322	33	5
NA	27366	G-protein beta-gamma:PI3K gamma	146850;2782;2790;5294;548645;552891	754;340;68;1102;360;153	0	0	0	1	0	8	0	4	350	2777	13	6
NA	114627	MYC/Max/TRRAP/GCN5/STAF65G/SPT3/TAF9/TAF10/TAF12/core Mediator	2648;4149;4609;6880;6881;6883;8295;8464;9913	837;160;454;264;218;161;3830;317;414	0	15	0	6	6	55	0	24	317	6655	100	9
NA	794542	WRAD	11091;5929;84661;9070	334;538;99;628	1	3	0.5	5	2	16	1	7	436	1599	31	4
NA	125458	IL3/IL3RA/CSF2RB (dodecamer)/YWHAZ	1439;3562;3563;7534	897;152;378;245	0	5	0.5	9	1	11	0	12	311.5	1672	37	4
NA	201152	JAK1:IFNalphaR:TYK2:STAT2	3454;3455;3716;6773;7297	557;515;1154;851;1187	0	3	3	19	3	17	1	8	851	4264	47	5
NA	524430	SMAD4-SKI-NCOR complex	4089;6497;9611	552;728;2440	2	9	0	4	5	53	2	6	728	3720	72	3
NA	123831	HGF(dimer)/MET(dimer)/p52 SHC	3082;4233;6464	728;1408;584	0	0	3	14	6	20	1	11	728	2720	45	3
NA	32478	U12 snRNP	10262;10992;23450;23451;51639;6628;6632;6633;6634;6635;6636;6637;83443	424;895;1217;1304;125;240;119;118;126;92;86;76;86	1	16	0	15	1	84	3	65	125	4908	180	13
NA	124674	RB1/E2F1-3/DP/CHE-1	1871;26574;5925;7027	465;560;928;410	2	12	1.5	9	9.5	50	2	17	512.5	2363	88	4
NA	132641	IL4/IL4R/JAK1/IL2R gamma/JAK3/SHIP	3561;3565;3566;3635;3640;3716;3718	369;153;825;1189;131;1154;1124	0	1	4	24	2	17	2	13	825	4945	55	7
NA	527145	CNS-P53 complex	10920;10980;10987;2873;50813;51138;7157;8533;9318	209;327;334;527;275;406;393;423;450	0	17	1	13	1	42	7	67	393	3344	139	9
NA	117034	TXA2/TP beta/beta Arrestin2/RAB11/GDP	409;6915;8766	409;407;216	0	3	2	4	3	10	2	5	407	1032	22	3
NA	124857	FGFR3-FGF complex/Pyk2	2185;2249;2261	1009;206;806	0	0	7	20	4	32	0	2	806	2021	54	3
NA	245535	SFTPD (SP-D) forms a complex with TLR4 and LY96	23643;6441;7099	160;375;839	0	0	0	2	0	3	0	0	375	1374	5	3
NA	123477	TP beta/GNAI2/GDP/G beta/gamma	2771;2782;54331;6915	355;340;71;407	0	0	0	3	2	10	2	12	347.5	1173	25	4
NA	53327	GPI-N-acetylglucosaminyltransferase	51227;5277;5279;5283;8818;9091	158;484;297;188;84;581	0	0	0	0	0	2	0	1	242.5	1792	3	6
NA	20471	TFIIIB:TFIIIC:TFIIIA:Type 1 Promoter Complex	2971;2972;2975;2976;55814;6908;9328;9329;9330	365;677;2109;911;2624;339;526;822;886	0	4	1	10	2	50	3	41	822	9259	105	9
NA	64512	Nup107 Complex	23279;4928;55746;57122;79023	1436;1800;1156;925;326	0	2	1	4	18	79	9	40	1156	5643	125	5
NA	533855	SMN containing complex	3956;3958;50628;6632;6633;6634;8487;6606	135;250;1058;119;118;126;280;294	0	1	1	12	1.5	22	1	14	192.5	2380	49	8
NA	172396	NKX 2.5/SRF/GATA4	1482;2626;6722	324;442;508	0	0	1	3	3	20	0	0	442	1274	23	3
NA	124350	PAK1/betaPIX/PKL/NCK1-2	5058;8440;8874;9815	553;380;803;759	0	3	4	14	10.5	47	0.5	3	656	2495	67	4
NA	120580	Gelsolin/PI-3-4-5-P3/PI3K	2934;5290;5295	782;1068;724	1	3	5	19	1	8	0	4	782	2574	34	3
NA	131514	gp130 (dimer)/TYK2/TYK2/LMO4	3572;7297;8543	918;1187;165	0	0	7	14	2	13	0	1	918	2270	28	3
NA	1933	SCF-beta-TrCP1 complex	6500;8454;8945	163;776;605	0	1	0	1	1	3	5	13	605	1544	18	3
NA	127697	alpha6/beta1 Integrin/Thrombospondin	3655;3688;7057	1091;801;1170	0	0	1	5	4	24	5	12	1091	3062	41	3
NA	23278	PAMP:NOD oligomer:K63-polyUb-RIP2:NEMO	10392;8517;8767	953;487;540	0	0	1	4	9	27	3	11	540	1980	42	3
NA	240570	CFLAR forms a complex with CASP8 and CASP3	836;841;8837	277;538;480	1	2	0	3	2	9	2	6	480	1295	20	3
NA	29399	Activated TrkA receptor:p-SHC	4803;4914;53358	241;796;594	0	0	6	13	0	1	0	0	594	1631	14	3
NA	524476	NuA4/Tip60 HAT complex	10524;10856;10902;10933;26122;54556;55929;57634;64769;80314;8089;8295;86;8607	546;463;1235;362;807;418;467;3122;201;836;227;3830;429;456	2	28	0.5	11	3	71	1.5	66	465	13399	176	14
NA	523259	MCM8-ORC2-CDC6 complex	4999;84515;990	577;840;560	0	3	0	1	9	26	0	2	577	1977	32	3
NA	123014	HGF(dimer)/MET(dimer)/RANBP10	3082;4233;57610	728;1408;620	0	0	1	12	8	22	2	12	728	2756	46	3
NA	205539	Frizzled:Dsh	11211;1855;1856;1857;2535;7855;7976;8321;8322;8323;8324;8325;8326	581;670;736;716;565;585;666;647;537;706;574;694;591	0	0	0	10	0	29	1	10	647	8268	49	13
NA	521450	hNURF complex	2186;5928;5931;6594	2920;425;425;1054	2	9	1.5	7	7	42	3.5	15	739.5	4824	73	4
NA	196991	TGF beta super family:Type II receptor	10220;151449;2658;2660;2661;2662;269;27302;3623;3624;3625;3626;392255;4838;650;651;652;653;654;655;656;659;7040;7042;7043;7048;8200;83729;92;9210;93;9573	407;450;429;375;454;478;573;424;366;426;407;352;455;347;396;472;408;454;513;431;402;1038;390;442;412;592;501;350;513;392;512;364	0	0	0	10	0	33	0	5	427.5	14525	48	32
NA	124702	IL12/IL12R/TYK2/JAK2/SOCS1	3592;3593;3594;3595;3717;7297;8651	253;328;662;862;1132;1187;211	0	0	0	23	1	6	0	1	662	4635	30	7
NA	122235	BMP9/BMPR2/Endoglin/ALK1 (dimer)	2022;2658;659;94	658;429;1038;503	0	0	0	3	4.5	22	0	0	580.5	2628	25	4
NA	13974	ub-FANCD- and ub-FANCI-bound chromatin	2177;55215;6233;7311;7314;7316	1471;1328;156;128;229;685	3	16	1	7	4	46	10	73	457	3997	142	6
NA	124843	HGF(dimer)/MET(dimer)/GAB2	3082;4233;9846	728;1408;676	0	0	11	23	14	39	0	10	728	2812	72	3
NA	120399	GMCSF/GMR alpha/CSF2RB/JAK2 (dodecamer)/SHP2	1437;1438;1439;3717;5781	144;434;897;1132;593	0	2	8	32	1	10	0	1	593	3200	45	5
NA	794219	GFP-TONSL	253714;25842;4171;4173;4175;4796;55723	1243;204;904;863;821;1378;202	0	8	0	6	7	63	1	51	863	5615	128	7
NA	795918	EBAFb	4298;57492;60;6597;6598;6599;6601;6602;6603;6605;86	559;2231;375;1679;385;1105;1214;515;531;411;429	1	20	1	25	9	124	7	74	531	9434	243	11
NA	172720	EIF-2-alpha(P)/EIF-2-beta/EIF-2-gamma/EIF-2B	1965;1968;8893;8894	315;472;721;333	0.5	3	1	5	7	28	9	32	402.5	1841	68	4
NA	527039	Ubiquitin E3 ligase (CRY1; SKP1A; CUL1; FBXL3)	1407;26224;6500;8454	586;428;163;776	0.5	2	0	2	1	4	4.5	19	507	1953	27	4
NA	525932	NCOR complex	2874;6907;7464;79718;8841;9611	327;577;525;514;428;2440	0	3	1	7	3.5	57	1	6	519.5	4811	73	6
NA	204797	TRAF6:IRAK-1:ECSIT complex	3654;51295;7189	712;431;522	0	0	0	2	0	10	2	7	522	1665	19	3
NA	127690	RET51/GFRalpha1/GDNF/Dok4	2668;2674;55715;5979	228;465;326;1114	0	0	1.5	20	0.5	3	0	0	395.5	2133	23	4
NA	126721	TCF4/beta catenin/KLF4	1499;6934;9314	781;596;479	2	5	0	10	6	33	3	17	596	1856	65	3
NA	120825	IL2R beta/JAK1/LCK/SOCS3	3560;3716;3932;9021	551;1154;509;225	0	1	3.5	15	4	19	0.5	6	530	2439	41	4
NA	114179	Type I PKA	5566;5567;5573;5575	351;398;381;381	1	3	1	5	6.5	25	7	28	381	1511	61	4
NA	190924	TNFRSF1A;TNFRSF1B;TRADD;TRAF2;PSMD2;TBK1;RASA3;BTRC;FBXW11	22821;23291;29110;5708;7132;7133;7186;8717;8945	834;542;729;908;455;461;501;312;605	0	2	1	11	3	27	1	46	542	5347	86	9
NA	19352	GRB2 bound to pFADK1 in Focal adhesion	2885;3674;3690;54518;5747;5906;6714;7094;7450	217;1039;788;666;1074;184;536;2541;2813	0	7	2	45	4	60	1	15	788	9858	127	9
NA	49226	Laminin-5	10319;3911;3913	1575;3695;1798	0	0	0	1	0	1	1	4	1798	7068	6	3
NA	40609	Lysosome Destined Cargo:AP-1:Beta-arrestin:Vamp:Clathrin Triskelion:Dynamin:Endophilin Complex	1211;1213;162;164;1785;4074;408;63915;6456;6844;81567;8905;8907	248;1675;949;825;870;277;418;187;352;116;432;157;435	0	12	1	28	2	33	2	58	418	6941	131	13
NA	130102	TGFB/TGFBR2/TGFBR1/km23-1/SMAD2	4087;7040;7046;7048;83658	467;390;503;592;96	0	4	0	5	10	35	2	8	467	2048	52	5
NA	523982	CAV1-VDAC1-ESR1 complex	2099;7416;857	595;283;178	6	15	3	9	7	33	7	17	283	1056	74	3
NA	533220	E2F4-p107-cyclinE complex	1874;5933;898	413;1068;410	0	1	0	1	11	34	0	1	413	1891	37	3
NA	56434	Dual-specific AKAPs:PKA tetramer	11216;5567;5573	662;398;381	1	2	1	4	6	17	8	19	398	1441	42	3
NA	527546	Oligosaccharyltransferase complex (Stt3B variant)	1603;1650;201595;6184;6185;7991;84061	113;456;826;607;631;348;367	0	2	0	3	1	13	2	37	456	3348	55	7
NA	127416	VE-cadherin/beta catenin/alpha catenin	1003;1495;1499	784;906;781	3	6	6	20	14	37	13	27	784	2471	90	3
NA	9819	intronless pre-mRNA cleavage complex	10914;10978;11051;1477;1478;1479;22916;29894;4686;51585;51692;53981;79869;8106	745;425;227;431;577;717;156;1443;790;1555;684;782;514;306	0	14	1	15	5	108	2.5	54	630.5	9352	191	14
NA	117387	FAK/Src-Yes-Fyn/GRB2/SOS1	2534;2885;5747;6654	537;217;1074;1333	0	4	7.5	33	11	53	0	6	805.5	3161	96	4
NA	114433	HSP60/TLR4/MD2 (dimer)/MYD88/TIRAP	114609;23643;3329;4615;7099	235;160;573;309;839	0	23	2	9	0	8	0	20	309	2116	60	5
NA	167445	AP-1/Ets1/Ets2	2113;2114;2353;3725	485;469;380;331	0.5	4	1.5	7	7.5	35	1	3	424.5	1665	49	4
NA	127903	IL2R beta/JAK1/LCK/SOCS1	3560;3716;3932;8651	551;1154;509;211	0	1	3.5	13	4	19	0	5	530	2425	38	4
NA	527964	PLC-gamma-1-SLP-76-SOS1-LAT complex	27040;3937;5335;6654	269;533;1290;1333	0	0	7	30	9.5	36	0	6	911.5	3425	72	4
NA	116735	SHP2/GAB1/GRB2/FRS2/FGFR/FGF/Syndecan-2	10818;2549;2885;5781;6383	508;724;217;593;201	0	6	5	36	7	40	0	7	508	2243	89	5
NA	128688	RET51/GFRalpha1/GDNF/DOK/RasGAP/NCK	1796;2668;2674;4690;5921;5979	481;228;465;377;1047;1114	0	0	3.5	36	1	17	0	0	473	3712	53	6
NA	123337	Nemo like kinase/SETDB1/CHD7	51701;55636;9869	527;2997;1291	0	0	1	2	24	60	1	4	1291	4815	66	3
NA	522741	SMN complex	11171;11218;25929;50628;54960;6628;6632;6633;6634;6635;6636;6637;79760;79833;8487;6606	350;824;1508;1058;242;240;119;118;126;92;86;76;131;167;280;294	0	5	0.5	12	1.5	66	2.5	38	203.5	5711	121	16
NA	169235	RELA/p50/ATF-2/IRF/c-JUN/HMG1	1386;3146;3659;3725;5970	505;215;325;331;551	3	22	1	5	10	47	1	15	331	1927	89	5
NA	168229	Ligand/GPCR(+)/Arrestin/(SRC/Hck/c-Fgr)	2268;408;6351;9560	529;418;92;92	0	0	1	9	1.5	6	0	0	255	1131	15	4
NA	130429	LEF1/beta catenin/CDX1	1044;1499;51176	265;781;399	1	4	0	10	5	27	0	13	399	1445	54	3
NA	49489	Alpha 11 beta 1 integrin: Collagen type-I:Mg++ complex	1277;1278;22801;3688	1464;1366;1188;801	0	1	0.5	5	1	6	0	7	1277	4819	19	4
NA	121766	Tubulin/HDAC6	10013;10376;7280	1215;451;445	0	10	3	16	9	26	9	27	451	2111	79	3
NA	524816	GCN5-TRRAP histone acetyltransferase complex	10474;2648;27097;2956;4436;672;6880;6881;8295;8464	432;837;589;1360;934;1884;264;218;3830;317	0.5	9	0.5	5	2.5	102	1	48	713	10665	164	10
NA	28424	AZIN1 bound OAZ:ODC complex	4946;4953;51582	228;461;448	0	0	0	0	0	1	3	7	448	1137	8	3
NA	526943	Ubiquitin E3 ligase (ASB7; TCEB1; TCEB2; CUL5; RNF7)	140460;6921;6923;8065;9616	318;112;161;780;113	0	1	0	2	0	5	2	7	161	1484	15	5
NA	172581	DR4/5/Caspase 8/Caspase 10	841;843;8795	538;522;440	0	1	1	4	1	6	1	4	522	1500	15	3
NA	521692	BAF complex	6597;6598;6599;6601;6602;6603;6605;8289;86	1679;385;1105;1214;515;531;411;2285;429	1	15	1	14	6	101	7	64	531	8554	194	9
NA	524876	18S U11/U12 snRNP	10081;10262;10594;10992;11066;154007;1665;23450;23451;4904;51639;55599;55954;6628;6632;6633;6634;6635;6636;6637;79622;8233;83443;85437	485;424;2335;895;251;339;795;1217;1304;324;125;517;170;240;119;118;126;92;86;76;132;482;86;217	0	25	0	27	1	113	2	144	245.5	10955	309	24
NA	127124	alpha2/beta1 Integrin/Type XI Collagen	1280;1301;1302;3673;3688	1487;1818;1736;1181;801	0	0	0	5	1	8	0	9	1487	7023	22	5
NA	529445	TNF-alpha/NF-kappa B signaling complex (CHUK; BTRC; NFKB2; PPP6C; REL; CUL1; IKBKE; SAPS2; SAPS1; ANKRD28; RELA; SKP1)	1147;22870;23243;4791;5537;5966;5970;6500;8454;8945;9641;9701	745;881;1053;900;342;619;551;163;776;605;716;932	0	11	0	9	3.5	61	1	27	730.5	8283	108	12
NA	44873	Axin:GSK3:CK1alpha:APC:PP2A complex	1452;2932;324;5516;5519;5528;8312	365;433;2843;309;667;602;862	0	1	2	19	11	119	5	34	602	6081	173	7
NA	123419	Ephrin A1/EPHA2/p52 SHC/GRB2	1942;1969;2885;6464	205;976;217;584	0	4	4	19	3.5	33	3.5	19	400.5	1982	75	4
NA	28774	Invaginating gap junction plaques	1173;1211;1213;1601;1759;2697;4646	435;248;1675;770;864;382;1285	0	10	3	28	6	59	2	62	770	5659	159	7
NA	128356	WNT3/FZD1/LRP6	4040;7473;8321	1613;355;647	0	0	1	7	0	10	1	3	647	2615	20	3
NA	117676	AR/RACK1/Src	10399;367;6714	317;920;536	1	4	7	23	11	33	2	15	536	1773	75	3
NA	29413	GRB2:SOS:Phospho-SHC	2885;53358;6654	217;594;1333	0	4	5	13	1	13	0	6	594	2144	36	3
NA	527612	Ubiquitin E3 ligase (DET1; DDB1; CUL4A; RBX1; COP1)	1642;55070;64326;8451;9978	1140;561;731;759;108	0	5	0	5	2	11	1	27	731	3299	48	5
NA	123330	Nephrin/NEPH1/podocin/PLCgamma1	4868;5335;55243;58510;7827	1241;1290;757;536;383	0	0	2	36	2	12	0	7	757	4207	55	5
NA	121918	RB1/E2F4/DP	1874;5925;7027	413;928;410	1	8	0	6	3	34	2	5	413	1751	53	3
NA	167900	TNF R/TRAF2/ASK1/RIP	4217;7132;7186;8737	1374;455;501;671	0	0	1	4	4.5	27	3	14	586	3001	45	4
NA	118592	uPA/uPAR/alpha5/beta1 Integrin	3678;3688;5328;5329	1049;801;431;335	0	0	0	4	2	8	1	9	616	2616	21	4
NA	120427	MGDIs/NGR/p75(NTR)/LINGO1/RHOGDI	396;4804;65078;84894	204;427;473;620	0	4	0.5	5	2.5	10	0	2	450	1724	21	4
NA	63864	T-cell receptor complex with dephosphorylated CD3 zeta chain	915;916;917;919	171;207;182;164	0	0	2	13	1.5	6	0	0	176.5	724	19	4
NA	205500	beta-catenin:TCF:Smad4	1499;4089;51176;6932;6934;83439	781;552;399;384;596;588	2	13	0	10	5	37	1.5	19	570	3300	79	6
NA	125398	ETB receptor/Endothelin-1/Gq/GTP	1906;1910;2767	212;442;359	0	0	1	4	1	11	0	6	359	1013	21	3
NA	117456	INI1/BRG1/BAF57/ER beta/GIOT-4	2100;6597;6598;6605;7561	530;1679;385;411;642	0	4	2	8	2	37	3	19	530	3647	68	5
NA	38587	SOCS6:p-c-Kit:sSCF dimer:p-c-Kit	3815;4254;9306	976;273;535	0	0	0	14	1	7	1	3	535	1784	24	3
NA	521641	FA core complex (Fanconi anemia core complex)	2175;2176;2178;2187;2188;2189;55120;57697;7415;80233	1455;558;536;859;374;622;380;2048;806;730	0	20	0	11	2	68	1	48	676	8368	147	10
NA	16340	NGF ligand:p75NTR:NRAGE:CHE1	26574;4803;4804;9500	560;241;427;834	0	1	1.5	7	2.5	22	6.5	35	493.5	2062	65	4
NA	525955	SH3P2/OSTF1-CBL-SRC complex	26578;6714;867	214;536;906	0	1	7	18	11	25	0	1	536	1656	45	3
NA	523250	BRD4-RFC complex	23476;5981;5982;5983;5984;5985	1362;1147;354;356;363;340	1.5	10	0.5	6	2.5	41	5	32	359.5	3922	89	6
NA	521956	PLCB3-PARD3-PARD6A complex	50855;5331;56288	346;1234;1356	0	2	5	21	9	39	0	2	1234	2936	64	3
NA	118386	B-cell antigen/BCR complex/LYN	4067;973;974	512;226;230	0	0	4	19	1	11	1	5	230	968	35	3
NA	128367	TGFB1/TGFBR2/Endoglin/TGFBR1/ALK1	2022;7040;7046;7048;94	658;390;503;592;503	0	0	0	4	7	29	0	4	503	2646	37	5
NA	532798	CRB1-MPP5-INADL complex	10207;23418;64398	1801;1406;675	0	0	4	9	3	9	0	0	1406	3882	18	3
NA	168331	ORC/CDC6/CDT1	23594;23595;4998;4999;5000;5001;81620;990	252;712;861;577;436;435;546;560	0	4	0	4	5	54	3.5	31	553	4379	93	8
NA	122831	IL8/CXCR2/VASP	3576;3579;7408	99;360;380	0	1	0	2	4	16	0	2	360	839	21	3
NA	523723	Integrator complex	25896;26173;26512;54973;55174;55656;55756;57117;57508;65123;80789;92105	962;2190;887;600;710;995;658;462;1204;1042;1019;963	0	2	0.5	8	2	39	4	48	962.5	11692	97	12
NA	256762	MAP3K7 forms a complex with MAP3K7IP2; MAP3K7IP3; and TRAF6	23118;257397;6885;7189	693;712;606;522	0	0	1.5	6	9	29	1	6	649.5	2533	41	4
NA	534005	MKK4-ARRB2-ASK1 complex	409;4217;6416	409;1374;399	1	4	0	2	8	24	2	4	409	2182	34	3
NA	533793	CSA complex	10920;10980;10987;1161;1642;2873;50813;51138;64708;8451;8533;9318;9978	209;327;334;396;1140;527;275;406;264;759;423;450;108	0	9	1	19	1	23	4	78	396	5618	129	13
NA	122900	VEGFR2 (dimer)/VEGFA (dimer)/NRP2	3791;7422;8828	1356;412;931	0	4	0	7	0	4	0	0	931	2699	15	3
NA	40976	Voltage-gated Calcium Channel; L-type; 1.3	776;783;9254	2181;660;1145	0	0	1	3	4	10	0	1	1145	3986	14	3
NA	128119	SMAD3/SMAD4/ATF2	1386;4088;4089	505;425;552	3	10	0	0	10	32	1	4	505	1482	46	3
NA	61252	Docked Glutamate Loaded Synaptic Vesicle	10815;22999;57030;5864;6616;6804;6812;6844;6857	134;1692;560;220;206;288;603;116;422	0	2	0	10	3	46	0	8	288	4241	66	9
NA	65024	G protein-GTP	2775;2790;548645;552891;59345	354;68;360;153;340	0	0	0	1	0	1	0	2	340	1275	4	5
NA	49209	Integrin alpha1beta1:Laminin-1:Mg++	284217;3672;3688;3912;3915	3075;1179;801;1786;1609	0	0	0	5	1	10	3	14	1609	8450	29	5
NA	524093	BRCA1-IRIS-pre-replication complex	4998;51053;990	861;209;560	2	6	0	0	9	36	1	4	560	1630	46	3
NA	530943	Respiratory chain complex I (gamma subunit) mitochondrial	4535;4536;4537;4541;4694;4696;4700;4702;4704;4705;4717;4725	318;347;115;174;70;84;154;172;377;355;76;106	0	1	0	0	0	1	0.5	22	163	2348	24	12
NA	528047	Mediator complex 2	10001;9282;9439	246;1454;1368	0	2	0	1	2	12	5	20	1368	3068	35	3
NA	795313	hPRC-H	1911;1912;3308;57332;6015;6045;648;80012;8243;8535	1004;858;840;389;406;336;326;995;1233;560	1	14	0	11	11	97	1.5	61	700	6947	183	10
NA	529900	SNARE complex (VAMP3; STX6; VTI1A)	10228;143187;9341	255;217;100	0	0	0	1	3	8	2	8	217	572	17	3
NA	528016	SMAD3-SMAD4-FOXO1 complex	2308;4088;4089	655;425;552	5	15	0	0	10	41	0	3	552	1632	59	3
NA	170047	GABA/GABA receptor/PLIC-1/PLIC-1	2554;2555;2556;2557;2558;2559;29979	456;451;492;554;462;453;589	0	1	1	5	1	7	0	8	462	3457	21	7
NA	54299	IL3:IL3R active complex; activated JAK2:p-STAT5	1439;3562;3563;3717;6776	897;152;378;1132;794	0	2	5	28	1	8	0	1	794	3353	39	5
NA	528628	LIFR-LIF-gp130 complex	3572;3976;3977	918;202;1097	0	0	2	9	3	14	0	1	918	2217	24	3
NA	131508	FAK/Src-Yes-Fyn/Endophilin-A2	5747;6455;6714	1074;368;536	0	0	7	24	11	43	0	1	536	1978	68	3
NA	522271	SKI-SMAD3-SMAD4 pentameric complex	4088;4089;6497	425;552;728	3	10	0	0	5	20	2	5	552	1705	35	3
NA	8037	GPIb-IX-V complex	2811;2812;2814;2815	639;206;560;177	0	1	0	3	1	7	0	0	383	1582	11	4
NA	23251	TRAF6 E3/E2 ubiquitin ligase complex	387521;387522;7189;7334;7335	270;370;522;152;170	1	6	0	2	0	4	0	8	270	1484	20	5
NA	123787	SMAD2-3/SMAD4/MYC/Max/MIZ-1	4088;4089;4149;4609;7709	425;552;160;454;803	4	20	0	5	9	41	3	14	454	2394	80	5
NA	120748	IGF-1R heterotetramer/IGF1/IRS1	3479;3480;3667	153;1367;1242	1	3	10	23	19	70	0	1	1242	2762	97	3
NA	529404	Snurportin-CRM1-RanGTP complex	10073;5901;7514	360;216;1071	5	10	2	6	1	13	5	18	360	1647	47	3
NA	120176	E2/ER alpha (dimer)/PELP1/Src/p52 SHC	2099;27043;6464;6714	595;1130;584;536	0	8	3	14	12	50	1	3	589.5	2845	75	4
NA	524324	p97/VCP-VIMP-DERL2 complex	51009;55829;7415	239;189;806	0	20	1	10	1	49	3	33	239	1234	112	3
NA	65806	CIN85 ubiquitinated	30011;6233;7311;7314;7316	665;156;128;229;685	3	16	1	4	4	32	8	36	229	1863	88	5
NA	171747	IL-10R/JAK1	3587;3588;3716	578;325;1154	0	0	2	6	2	8	0	5	578	2057	19	3
NA	522489	Tetrameric COG subcomplex	10466;57511;84342;91949	860;657;612;770	0	1	0	1	0.5	3	1	7	713.5	2899	12	4
NA	57526	DOCK2:ELMO1:RAC1:Nef Complex	1794;5879;9844	1830;211;727	2	6	4	12	2	17	8	26	727	2768	61	3
NA	533960	SMAD4-SNO-SKI complex	4089;6497;6498	552;728;684	2	7	0	0	5	11	3	11	684	1964	29	3
NA	57782	PRLR ligands:p(S349)- PRLR:JAK2 dimer:SCF beta-TrCP complex	1442;1443;3717;5618;6500;8454;8945;9978	256;217;1132;622;163;776;605;108	0	1	0	17	1	8	0	14	430.5	3879	40	8
NA	63777	CENP-O complex	23421;401541;55166;79172;79682	177;288;268;300;418	0	0	0	1	4	29	1	4	288	1451	34	5
NA	528130	p14-Mp1-MEK1 complex	28956;5604;8649	125;393;124	0	0	0	0	0	11	1	9	125	642	20	3
NA	531983	BRCC complex	5888;672;675;79184;9577	340;1884;3418;316;415	0	2	1	4	2	68	3	11	415	6373	85	5
NA	205602	Wnt:Frizzled:Arrow/LRP5/6	11211;2535;4040;4041;51384;54361;7471;7472;7473;7474;7475;7476;7477;7478;7479;7480;7481;7482;7483;7484;7855;7976;80326;81029;8321;8322;8323;8324;8325;8326;89780	581;565;1613;1615;365;351;370;360;355;380;365;349;349;351;351;389;354;391;365;357;585;666;417;359;647;537;706;574;694;591;352	0	0	0	13	0	24	0	9	380	16304	46	31
NA	197140	BMPR1_p:Smad7	4092;657;658	426;532;502	0	2	0	0	2	6	0	1	502	1460	9	3
NA	12595	incision complex for GG-NER	1022;1642;1643;2067;2068;2071;2072;2073;2965;2966;2967;2968;4331;5887;6117;6118;6119;7507;7508;902	346;1140;427;297;760;782;916;1186;548;395;308;462;309;409;616;270;121;273;940;323	0	14	0	13	2.5	94	4	103	418	10828	224	20
NA	123133	alphaM/beta2 Integrin/GPIbA	2811;3684;3689	639;1152;769	0	1	0	3	5	13	0	1	769	2560	18	3
NA	49256	Integrin alpha3beta1:Thrombospondin-1	3675;3688;7057	1051;801;1170	0	0	1	5	2	6	1	8	1051	3022	19	3
NA	124044	BGN/TLR4/MD2 (dimer)	23643;633;7099	160;368;839	0	0	0	2	0	3	0	0	368	1367	5	3
NA	54307	High affinity GM-CSF receptor complex dimer; activated JAK2:p-STAT5	1437;1438;1439;3717;6776	144;434;897;1132;794	0	2	5	28	1	8	0	1	794	3401	39	5
NA	45806	PPARA:RXRA Coactivator Complex	5465;6256;6907;79718;85441	468;462;577;514;2649	0	1	1	4	5	25	0	4	514	4670	34	5
NA	530018	COG2-COG3-COG4 subcomplex	22796;25839;83548	738;789;828	1	3	0	2	3	8	4	9	789	2355	22	3
NA	171284	FAS/DAXX/FADD/Caspase 10	1616;355;843;8772	752;335;522;208	0	1	2	9	4.5	36	1.5	9	428.5	1817	55	4
NA	65881	PDGF:PDGF receptor dimer	1436;5154;5159	972;211;1106	0	0	9	25	1	6	1	5	972	2289	36	3
NA	18604	ADP:P2Y purinoceptor 12:G-protein Gi (active)	10681;2773;2790;548645;552891;64805	395;354;68;360;153;342	0	0	0	3	0	0	0	8	348	1672	11	6
NA	526534	AP4 adaptor complex	10717;11154;23431;9179	739;159;1137;453	0	0	1	4	3	9	1	6	596	2488	19	4
NA	115420	TGFB/TGFBR2/TGFBR1/SMAD7/SMURF1-2/CAV1	4092;64750;7043;7046;7048;857	426;748;412;503;592;178	0	3	0.5	9	4	29	0	9	464.5	2859	50	6
NA	118139	HPV-16 E6/E6AP/NFX1/SIN3/HDAC complex	10284;23309;25942;3065;3066;57169;5928;5931;7337;8819	172;1162;1273;482;582;1918;425;425;875;220	1.5	22	1	10	4	49	4.5	57	532	7534	138	10
NA	524709	Polycystin-1-E-cadherin-beta-catenin-Flotillin-2 complex	1499;2319;5310;999	781;428;4303;882	0	3	4	19	9.5	41	3.5	20	831.5	6394	83	4
NA	44622	Activated FGFR:p-SHC1	2253;2261;6464	244;806;584	0	0	3	10	4	10	0	1	584	1634	21	3
NA	133637	alpha6/beta4 Integrin/Laminin/14-3-3	3655;3691;7531	1091;1822;255	0	4	1	18	20	73	13	33	1091	3168	128	3
NA	523349	ZAP70-CRKL-WIPF1-WAS complex	1399;7454;7456;7535	303;502;503;619	0	1	3.5	22	7	24	0.5	2	502.5	1927	49	4
NA	127683	NCK1/PAK1/Dok-R	4690;5058;9046	377;553;412	0	3	5	14	7	30	1	2	412	1342	49	3
NA	117724	TCR/CD3/MHC II/CD4/LCK/ZAP-70/3BP2	3122;3123;3932;6452;7535;915;916;917;919;920	254;266;509;561;619;171;207;182;164;458	0	2	2	35	2	29	0	5	260	3391	71	10
NA	132852	alpha9/beta1 Integrin/VEGFA (dimer)	3680;3688;7422	1035;801;412	1	5	0	4	1	5	0	7	801	2248	21	3
NA	54129	Cx43:ZO-1:c-src gap junction	2697;6714;7082	382;536;1748	0	0	7	35	15	94	2	10	536	2666	139	3
NA	133250	CBL/APS/CAP	10580;10603;867	1292;675;906	1	2	4	15	11	32	0	0	906	2873	49	3
NA	245116	MAP3K7IP2 forms a complex with NCOR1 and HDAC3	23118;8841;9611	693;428;2440	0	2	1	6	9	54	1	2	693	3561	64	3
NA	131566	SMAD2-3/SMAD4/SP1/MIZ-1	4088;4089;6667;7709	425;552;785;803	2	10	0	2	7.5	43	1.5	7	668.5	2565	62	4
NA	129149	RB1/E2F1/DP	1869;5925;7029	437;928;386	3	10	0	6	7	36	1	3	437	1751	55	3
NA	170714	D1/g-alpha-s/g-beta/g-gamma/GDP	1812;2778;2782;2792	446;1037;340;74	0	0	0.5	3	1	4	2	19	393	1897	26	4
NA	526042	MBD1-MCAF1-SETDB1 complex	4152;55729;9869	605;1270;1291	1	2	1	3	14	54	3	7	1270	3166	66	3
NA	121396	alphav/beta3 Integrin/VEGFR2/VEGFA (dimer)	3685;3690;3791;7422	1048;788;1356;412	0	4	2	11	3.5	11	0	7	918	3604	33	4
NA	798377	COP9.complex	10980;10987;2873;50813;51138;64708;8533;9318	327;334;527;275;406;264;423;450	0	4	1	13	0.5	12	6	49	370	3006	78	8
NA	197738	Antigen:MHC II complex	3113;3115;3117;3118;3119;3122;3123;3125;3126	260;258;255;255;261;254;266;266;266	0	0	0	1	0	1	0	5	260	2341	7	9
NA	59943	Cargo:AP-1:Beta-arrestin:Clathrin Triskelion:Vamp Complex	1211;1213;162;164;3482;408;6844;7163;8905;8907	248;1675;949;825;2491;418;116;224;157;435	0.5	13	2.5	26	3	34	3	57	426.5	7538	130	10
NA	795222	TAF4-TFIID	129685;51616;6872;6873;6874;6877;6878;6879;6880;6881;6882;6883;6884;6908;83860	310;251;1893;1199;1085;800;677;349;264;218;211;161;124;339;929	0	7	0	9	3	83	0	7	339	8810	106	15
NA	115458	IL2R	3559;3560;3561	272;551;369	0	0	4	10	2	6	0	2	369	1192	18	3
NA	64676	IL2RA:IL2RB:p-JAK1	3559;3560;3716	272;551;1154	0	0	4	10	2	10	0	5	551	1977	25	3
NA	23148	C8	731;732;733	584;591;202	0	0	0	1	1	4	0	0	584	1377	5	3
NA	38059	eNOS:Caveolin-1:CaM	4846;857;805	1203;178;149	1	5	2	8	6	19	4	14	178	1530	46	3
NA	5019	HJURP:CENPA Complex	1058;238;4869;55355;5914;5928;8607;8294	140;1620;294;748;462;425;456;103	1	23	0	19	5.5	63	1	29	440.5	4248	134	8
NA	124940	RELN/LRP8/Fyn	2534;5649;7804	537;3460;963	0	1	2	12	1	11	0	1	963	4960	25	3
NA	529914	SNARE complex (VAMP3; VAMP4; VAMP8; STX6)	10228;8673;8674;9341	255;100;141;100	0	0	0	1	3.5	14	3	10	120.5	596	25	4
NA	39449	SIAH2 bound to DCC:Netrin-1	1630;6478;9423	1447;324;604	0	0	1	3	3	6	0	0	604	2375	9	3
NA	133607	alpha6/beta1 Integrin/Laminin 10	3655;3688;3911;3912;3915	1091;801;3695;1786;1609	0	0	1	7	4	30	4	20	1609	8982	57	5
NA	13351	FASL:FAS Receptor Trimer:FADD:pro-Caspase-10	355;356;843;8772	335;281;522;208	0	0	0.5	4	2	10	0	3	308	1346	17	4
NA	200642	Crk family:C3G	1398;1399;2889	304;303;1095	0	0	6	16	8	24	0	1	304	1702	41	3
NA	121743	RET51/GFRalpha1/GDNF/Dok5	2668;2674;55816;5979	228;465;306;1114	0	1	0	17	0	2	0	0	385.5	2113	20	4
NA	36389	V-ATPase	23545;51382;51606;523;526;527;528;529;533;8992;9114;9296;9550	856;247;483;617;511;155;382;226;205;81;351;119;118	0	3	1	9	0	14	2	38	247	4351	64	13
NA	525331	ITGAM-ITGB2-CD11 complex	3684;3689;967	1152;769;238	0	0	0	0	3	8	1	4	769	2159	12	3
NA	132844	SMAD3/SMAD4/DLX1	1745;4088;4089	255;425;552	3	8	0	0	5	15	0	3	425	1232	26	3
NA	114884	Ephrin A1/EPHA2/Src	1942;1969;6714	205;976;536	0	0	7	18	11	37	0	12	536	1717	67	3
NA	15771	Poly-K6-Ub-hp-IRAK1:IKK complex	1147;3551;3654;8517	745;756;712;487	0	1	0.5	4	9.5	41	3	15	728.5	2700	61	4
NA	64385	NRP-1:pPlexin-A:Fyn	2534;5361;8829	537;1896;923	0	0	2	14	2	13	2	6	923	3356	33	3
NA	66153	Cargo:AP-1:beta-Arrestin-1:Vamp Complex	162;164;3482;408;6844;7163;8905;8907	949;825;2491;418;116;224;157;435	0.5	5	1.5	13	3	25	3	25	426.5	5615	68	8
NA	204765	TLR4:CD14:MD-2 complex	23643;7099;929	160;839;375	0	0	0	2	0	3	0	0	375	1374	5	3
NA	122296	alpha4/beta1 Integrin/CD81	3676;3688;975	1032;801;236	0	0	1	5	3	7	5	14	801	2069	26	3
NA	530227	SNX complex (SNX1a; SNX2; SNX4; LEPR)	3953;6642;6643;8723	1165;522;519;450	0.5	3	0.5	5	3.5	16	2	12	520.5	2656	36	4
NA	205562	Dsh:GBP/Frat:GSK-3	10023;1855;1856;1857;23401;2932	279;670;736;716;233;433	0	0	0.5	10	5.5	41	0.5	4	551.5	3067	55	6
NA	114371	MYC/Max/NF-Y	4149;4609;4800;4801;4802	160;454;347;207;354	0	11	0	4	2	26	1	10	347	1522	51	5
NA	17073	CD28:PI3K	3932;5290;5296;940;942	509;1068;728;220;329	0	1	3	18	2	18	0	0	509	2854	37	5
NA	532506	PIDDsome complex	55367;835;8738	910;452;199	0	0	0	0	3	6	0	3	452	1561	9	3
NA	127972	sTNF-alpha/TNFR1A/TRADD/RIP/TRAF2/TAK1/TAB family	10454;6885;7124;7132;7186;8717;8737	504;606;233;455;501;312;671	0	0	0	4	4	32	1	20	501	3282	56	7
NA	54359	High affinity GM-CSF receptor complex dimer; inactive JAK2; phosphorylated Bc:SHC1	1437;1438;1439;3717;6464	144;434;897;1132;584	0	0	3	26	1	9	0	1	584	3191	36	5
NA	170696	VHL/E2/HIF-1-alpha/ubiquitin	3091;7319;7428	826;152;213	0	3	0	1	5	13	1	16	213	1191	33	3
NA	794626	MLL/HCF	11091;29915;3054;4221;4297;5929;9070	334;792;2035;615;3969;538;628	1	12	1	10	5	109	1	21	628	8911	152	7
NA	118854	mTORC1	2475;57521;64223	2549;1335;326	0	1	2	4	29	64	9	20	1335	4210	89	3
NA	117587	RGS9-1/Gbeta5/R9AP	10681;388531;8787	395;235;674	0	1	0	1	0	0	0	0	395	1304	2	3
NA	6705	ORC complex bound to origin	23594;23595;4998;4999;5000;5001	252;712;861;577;436;435	0	1	0	4	2.5	38	3	22	506.5	3273	65	6
NA	64378	Activated PAR1:Beta-arrestin-1:Activated Src:Activated ERK	2149;408;5595;6714	425;418;379;536	0	0	2	13	5.5	25	0	3	421.5	1758	41	4
NA	522571	CBP-RARA-RXRA-DNA complex; ligand stimulated	1387;5914;6256	2442;462;462	0	18	1	6	7	34	0	1	462	3366	59	3
NA	532331	BAF complex	6595;6597;6598;6599;6601;6602;6603;6604;6605;8289;86	1590;1679;385;1105;1214;515;531;483;411;2285;429	1	25	1	17	6	130	6	71	531	10627	243	11
NA	170179	SUMO2/3/SAE1/SAE2	10054;10055;6612;6613	640;346;103;95	3	12	0	1	2	12	7	31	224.5	1184	56	4
NA	125491	SMAD3/SMAD4/HNF4	3172;4088;4089	474;425;552	4	12	0	0	10	32	0	3	474	1451	47	3
NA	167841	TGF-beta/TGF-beta/TGF-beta-R1/TGF-beta-R1/TGF-beta-R2/TGF-beta-R2	7042;7046;7048	442;503;592	0	0	1	5	10	21	0	2	503	1537	28	3
NA	119019	proNGF (dimer)/p75(NTR)/Sortilin/Necdin	4692;4803;4804;6272	321;241;427;831	0	0	0	1	1	6	0	1	374	1820	8	4
NA	60085	ESCRT-III/Cargo Complex	128866;27243;51652;6233;7311;7314;7316;79643;91782	224;222;222;156;128;229;685;201;453	2	18	1	5	3	24	8	49	222	2520	96	9
NA	132124	alpha1/beta1 Integrin/Type II Collagen	1280;3672;3688	1487;1179;801	0	0	0	4	0	4	0	7	1179	3467	15	3
NA	527568	FARP2-NRP1-PlexinA3 complex	55558;8829;9855	1871;923;1054	0	1	2	6	2	11	1	5	1054	3848	23	3
NA	526732	Ternary complex (LRRC7; CAMK2a; ACTN4)	57554;81;815	1537;911;489	0	5	4	10	10	31	1	11	911	2937	57	3
NA	55393	Tetrameric UGT1A1	54575;54576;54577;54578;54579;54600;54657;54658;54659	530;530;530;532;534;530;534;533;534	0	0	0	0	0	2	0	0	532	4787	2	9
NA	115809	coatomer protein complex/ARF1/GTP/ARF-GAP1	1211;1212;1314;375;55738	248;229;1233;181;414	0	3	3	12	3	29	1	32	248	2305	76	5
NA	2703	pol II transcription complex containing 9 nucleotide long transcript	1022;2068;2071;2962;2963;2965;2966;2967;2968;4331;5430;5431;5432;5433;5434;5435;5436;5437;5438;5439;5440;5441;902	346;760;782;517;249;548;395;308;462;309;1970;1174;275;142;210;127;172;150;125;117;58;67;323	0	8	0	25	1	106	3	130	308	9586	269	23
NA	199486	(FGF:FGFR_P):PLC gamma	2246;2247;2248;2249;2250;2251;2252;2253;2254;2255;2256;2258;2259;2260;2261;2263;2264;26281;26291;27006;5335;5336;8074;8817;8822;8823;9965	155;288;239;206;268;208;194;244;208;208;225;255;252;822;806;822;802;211;209;170;1290;1265;251;207;216;207;216	0	7	0	64	0	38	0	9	225	10444	118	27
NA	123470	Syndecan-2/alpha2/beta1 Integrin	3673;3688;3909;6383	1181;801;3333;201	0	0	2.5	9	3.5	14	1	9	991	5516	32	4
NA	125097	IL4/IL4R/JAK1/IL2R gamma/JAK3/FES	2242;3561;3565;3566;3640;3716;3718	822;369;153;825;131;1154;1124	0	0	4	23	2	23	1	12	822	4578	58	7
NA	122483	RPA/RAD17/RFC2-5	5884;5982;5983;5984;5985;6117;6118	681;354;356;363;340;616;270	1	9	0	5	4	28	5	43	356	2980	85	7
NA	118825	p47 Phox/p67 Phox/cytochrome b-245	1535;1536;4688;653361	195;570;526;390	0	0	0	3	1.5	20	0.5	5	458	1681	28	4
NA	63785	CCAN network	1060;1325;23421;2491;378708;401541;55166;55839;64105;64946;79019;79172;79682;80152;91687	943;105;177;756;138;288;268;353;269;247;180;300;418;561;390	0	0	0	3	2	94	1	22	288	5393	119	15
NA	529494	TLE-Histone H3 complex	7088;7089;7090;7091;8350	770;743;772;773;136	1	12	1	4	8	63	1	12	770	3194	91	5
NA	132080	alphaX/beta2 Integrin/ICAM1	3383;3687;3689	532;1163;769	0	0	0	2	3	8	1	3	769	2464	13	3
NA	133542	TGFB/TGFBR2/TGFBR1/SMAD7/YAP65	10413;4092;7043;7046;7048	504;426;412;503;592	0	2	1	7	10	56	0	3	503	2437	68	5
NA	132052	WNT5A/FZD4/LRP5	4041;7474;8322	1615;380;537	0	0	0	1	0	0	0	1	537	2532	2	3
NA	523446	JUN-TCF4-CTNNB1 complex	1499;3725;6925	781;331;671	3	6	1	11	15	43	1	14	671	1783	74	3
NA	130964	LAT/GRAP2/SLP76/ADAP	2533;27040;3937;9402	829;269;533;330	0.5	5	7	26	5.5	25	0	0	431.5	1961	56	4
NA	117370	RET9/GFRalpha1/GDNF/SHC/Grb2/SOS1	2668;2674;2885;5979;6464;6654	228;465;217;1114;584;1333	0	4	2.5	27	1.5	21	0	7	524.5	3941	59	6
NA	199514	Ras:PI3-kinase	3265;3845;4893;5290;5291;5293;5295	189;189;189;1068;1070;1044;724	0	1	2	30	1	14	2	13	724	4473	58	7
NA	132957	EGFR/EGFR/EGF/EGF/GRB2/PAK1	1950;1956;2885;5058	1207;1210;217;553	3	10	5	27	12	57	3.5	24	880	3187	118	4
NA	56791	IDH3 complex	3419;3420;3421	366;385;393	1	5	0	1	0	1	2	5	385	1144	12	3
NA	13555	DNA double-strand break ends: MRN complex	10111;3014;4361;4683	1312;143;708;754	3.5	18	1.5	5	13	51	6	28	731	2917	102	4
NA	204531	PDGFR-bb:RasGAP	1436;5159;5921	972;1106;1047	0	0	9	29	1	6	1	5	1047	3125	40	3
NA	123850	TGFB1/TGFBR2/Endoglin (dimer)	2022;7040;7048	658;390;592	0	0	0	4	7	17	0	2	592	1640	23	3
NA	123920	TNF-alpha/TNFR2 (cleaved)/TRAF1/TRAF2/cIAP1/cIAP2	329;330;7124;7133;7185;7186	618;604;233;461;416;501	0	0	0	0	2.5	16	1.5	25	481	2833	41	6
NA	116809	proNGF (dimer)/p75(NTR)/Sortilin/NRAGE	4803;4804;6272;9500	241;427;831;834	0	0	0.5	5	1	6	0	22	629	2333	33	4
NA	526930	Ubiquitin E3 ligase (WSB1; TCEB1; TCEB2; CUL5; RBX1)	26118;6921;6923;8065;9978	421;112;161;780;108	0	1	0	2	0	6	2	11	161	1582	20	5
NA	204736	TLR4:MyD88:IRAK-4:IRAK-1:Tollip	3654;4615;51135;54472;7099	712;309;460;274;839	0	2	1	5	3	24	1	11	460	2594	42	5
NA	63740	NF-Y	4800;4801;4802	347;207;354	0	0	0	1	0	2	1	3	347	908	6	3
NA	115554	HES1/TLE1/PARP1	142;3280;7088	1014;280;770	1	12	0	1	8	21	2	22	770	2064	56	3
NA	527490	ELMO1-DOCK1-CRKII complex	1398;1793;9844	304;1865;727	2	5	6	13	5	14	0	2	727	2896	34	3
NA	193711	IFITM1;CR2;CD19	1380;8519;930	1092;125;556	0	0	2	9	0	4	0	1	556	1773	14	3
NA	121025	alpha4/beta1 Integrin/VCAM1/Paxillin	3676;3688;5829;7412	1032;801;591;739	0	0	3	15	3.5	43	1	9	770	3163	67	4
NA	193089	PLCG1;GRB2;SOS1	2885;5335;6654	217;1290;1333	0	4	5	21	7	20	6	12	1290	2840	57	3
NA	133033	alphaM/beta2 Integrin/Hck	3055;3684;3689	526;1152;769	0	0	0	7	4	12	1	3	769	2447	22	3
NA	170113	CREM/ACT/Kif17b	1390;57576;9457	300;1029;284	0	0	0	0	1	13	0	0	300	1613	13	3
NA	119097	ErbB2/ErbB3/neuregulin 1 beta/SHC	2064;2065;3084;6464	1255;1342;645;584	0	1	7.5	28	4.5	23	0.5	8	950	3826	60	4
NA	9841	upstream mRNA fragment:CPSF:PAP:PABPN1 complex	10914;22916;29894;4686;51692;53981;8106	745;156;1443;790;684;782;306	1	9	1	6	5	42	4	37	745	4906	94	7
NA	132152	BGN/TLR2/TLR1/MD2 (dimer)/MYD88/TIRAP	114609;23643;4615;633;7096;7097	235;160;309;368;786;784	0	0	0	4	0	0	0	1	338.5	2642	5	6
NA	56318	SOS-1 bound to Tie2:Grb2	284;2885;6654;7010	498;217;1333;1124	0.5	5	3.5	13	1	14	0	6	811	3172	38	4
NA	17497	RBX1-CUL5-EloB/C-ASB	142686;201625;6921;6923;8065;9978	587;3092;112;161;780;108	0	1	0.5	4	2	10	1.5	8	374	4840	23	6
NA	19810	viral dsRNA:TLR3:TRIF:TRAF6	148022;7098;7189	712;904;522	0	0	2	4	1	3	1	3	712	2138	10	3
NA	245638	A heterodimer of RELA and REL forms a complex with IL2 promoter	3558;5966;5970	153;619;551	0	7	0	4	6	16	0	0	551	1323	27	3
NA	128350	RXRs/NUR77/BCL2	3164;596;6258	598;239;463	0	0	0	1	6	12	0	1	463	1300	14	3
NA	65327	pp38 alpha/beta/gamma:ABL1:JLP:CDO complex	1000;1495;25;50937;5600;663;9043;91653;998	906;906;1149;1264;364;435;1321;1114;191	0	6	3	37	2	97	1	26	906	7650	166	9
NA	122141	IL8/CXCR2/beta Arrestin1-2/AP-2	3576;3579;409	99;360;409	0	3	0	2	1	5	0	2	360	868	12	3
NA	49725	Integrin alpha IIb beta 3:Fibrin complex	2243;2244;2266;3674;3690	866;491;453;1039;788	0	2	1	5	0	14	0	0	788	3637	21	5
NA	531306	TFTC-type histone acetyl transferase complex	10025;2099;2648;5469;8295;9282;9439;9440;9862;9968;9969	877;595;837;1581;3830;1454;1368;651;989;2177;2174	0	18	1	13	9	136	5	68	1368	16533	235	11
NA	528452	p50-p65 NF(kappa)B-SRC1 complex	4790;5970;8648	969;551;1441	3	10	0	2	16	49	0	5	969	2961	66	3
NA	13329	FASL:FAS Receptor Trimer:FADD complex	355;356;8772	335;281;208	0	0	0	3	3	9	0	3	281	824	15	3
NA	201773	JAK1:IL-13RA-1:IL-4R alpha:TYK2:IRS-1	3566;3597;3667;3716;7297	825;427;1242;1154;1187	0	2	5	28	2	61	1	8	1154	4835	99	5
NA	522102	Rb-tal-1-E2A-Lmo2-Ldb1 complex	4005;5925;6886;6929;8861	227;928;331;654;411	0	10	3	15	6	49	1	4	411	2551	78	5
NA	115578	TCR/CD3/MHC I/CD8/LCK/ZAP-70	3105;3932;567;7535;915;916;917;919;925;926	365;509;119;619;171;207;182;164;235;210	0	2	2	33	1.5	31	0	8	208.5	2781	74	10
NA	250983	NFKB1(p50) and RELA form a complex with IL8 promoter	3576;4790;5970	99;969;551	3	10	0	2	10	26	0	5	551	1619	43	3
NA	198714	Ras:GTP:Raf	10971;2810;3265;3845;4893;7529;7531;7532;7533;7534	245;248;189;189;189;246;255;247;246;245	3	26	1	14	5.5	47	6	70	245.5	2299	157	10
NA	197464	IkB:NFkB	4790;4792;4793;4794;5970	969;317;356;500;551	0	10	1	5	8	41	0	10	500	2693	66	5
NA	527783	TFIID complex	6872;6874;6877;6878;6879;6880;6881;6882;6883;6884;6908	1893;1085;800;677;349;264;218;211;161;124;339	0	2	0	6	2	44	0	6	339	6121	58	11
NA	203402	JAK:SOCS1	3716;3717;3718;7297;8651	1154;1132;1124;1187;211	0	0	5	31	2	13	1	9	1132	4808	53	5
NA	197913	PIP3:Akt	10000;207;208	479;480;481	0	0	3	10	8	23	3	7	480	1440	40	3
NA	123802	sTNF-alpha/TNFR1A/FAN/NSMASE	6610;7124;7132;8439	423;233;455;948	0	0	0	2	1.5	6	0.5	2	439	2059	10	4
NA	169852	LPS/TLR4/TLR4/TIRAP/TOLLIP/PKR/MYD88/IRAK/MD-2/CD14	114609;23643;3654;4615;54472;5610;7099;929	235;160;712;309;274;551;839;375	0	0	1	11	0	24	0.5	16	342	3455	51	8
NA	66083	multiubiquitinated Skp2:phospho-APC/C:Cdh1 complex	10393;11065;246184;29882;29945;51343;51433;51434;51529;6233;64682;6502;7311;7314;7316;7321;7324;8697;8881;996	185;179;85;822;808;496;755;599;196;156;1944;424;128;229;685;147;193;597;620;830	0	21	1	16	4	164	5	118	460	10078	319	20
NA	250977	AKT1 forms a complex with CENTB1 (ACAP1) and ITGB1	207;3688;9744	480;801;740	0	1	4	10	4	14	4	11	740	2021	36	3
NA	64480	active pre-replicative complex	23594;23595;4171;4172;4173;4174;4175;4176;4998;4999;5000;5001;84515;990	252;712;904;808;863;734;821;719;861;577;436;435;840;560	0.5	16	1	19	5.5	123	6	112	726.5	9522	270	14
NA	116074	alpha3/beta1 Integrin/Laminin 11	3675;3688;3911;3913;3915	1051;801;3695;1798;1609	0	0	1	6	1	7	3	16	1609	8954	29	5
NA	39764	Glypican-1:Slit2:Robo1:Ena/Vasp proteins	2817;55740;6091;9353	558;591;1651;1529	0	0	0	7	5.5	25	0.5	3	1060	4329	35	4
NA	531027	12S U11 snRNP	10081;11066;114034;154007;4904;6432;6628;6632;6633;6634;6635;6636;6637;79622;79706	485;251;510;339;324;238;240;119;118;126;92;86;76;132;184	0	8	0	6	1	52	2	30	184	3320	96	15
NA	197414	TAK1:TAB	10454;23118;257397;6885	504;693;712;606	0	0	0.5	4	9	35	0.5	5	649.5	2515	44	4
NA	523371	APH1A-PSEN2-NCSTN complex	23385;51107;5664	709;265;448	0	0	0	0	0	10	1	3	448	1422	13	3
NA	794065	ING2-TAP	23450;25855;25942;3065;3066;3622;51742;5926;5928;5931;64426;84312	1217;290;1273;482;582;280;1312;1257;425;425;328;323	1.5	26	0.5	8	5.5	91	2.5	42	453.5	8194	167	12
NA	45099	EGF:p-6Y-EGFR:CBL:GRB2	1950;1956;2885;867	1207;1210;217;906	2	8	7.5	32	6	45	3	23	1056.5	3540	108	4
NA	120113	alphaM/beta2 Integrin/uPAR	3684;3689;5329	1152;769;335	0	0	0	0	3	8	0	1	769	2256	9	3
NA	56726	CDK2:CABLES1:Wee-1	1017;7465;91768	298;646;633	0	1	1	7	17	48	0	12	633	1577	68	3
NA	125862	VEGFR2 (dimer)/VEGFA (dimer)/Fyn/NCK1-2/PAK2	2534;3791;5062;7422;8440	537;1356;524;412;380	0	7	4	24	4	31	0	4	524	3209	66	5
NA	167518	S1P/EDG1/G-beta/G-gamma/G-alpha-i	1901;2770;2782;2792	382;354;340;74	0	0	0	1	0.5	3	2	12	347	1150	16	4
NA	36880	Activated FGFR:p-FRS2-alpha:p-SHP2	10818;2261;5781;8074	508;806;593;251	0	2	6	21	5.5	26	0	1	550.5	2158	50	4
NA	121562	SMAD3/SMAD4/SP1	4088;4089;6667	425;552;785	3	9	0	0	10	41	0	3	552	1762	53	3
NA	525318	FACT complex; UV-activated	11198;1457;1459;1460;58496;6749	1047;391;350;215;201;709	1	18	3.5	19	9.5	56	5	38	370.5	2913	131	6
NA	528495	E2F5-RB2-DP1 complex	1875;5934;7027	346;1139;410	0	1	0	1	2	38	1	4	410	1895	44	3
NA	18272	HLA-A3 interacting with KIR3DL2	3105;3812;567	365;455;119	0	0	0	1	0	7	0	8	365	939	16	3
NA	118351	mTOR/GBL/SIN1/PROTOR1/DEPTOR	2475;55615;64223;64798;79109	2549;388;326;409;522	0	1	0	2	6	61	0	11	409	4194	75	5
NA	528338	Ubiquitin E3 ligase (FBXW11; SKP1A; CUL1; RBX1)	23291;6500;8454;9978	542;163;776;108	0	1	0	1	1.5	5	3	15	352.5	1589	22	4
NA	128636	RAR alpha/9cRA/Cyclin H	5914;6256;902	462;462;323	0	0	0	1	7	20	0	0	462	1247	21	3
NA	20552	TFIIIB-Type 3 Promoter Selective Complex	55290;55814;6908	419;2624;339	0	2	1	2	1	9	2	5	419	3382	18	3
NA	191127	SKP1;BTRC;FBXW11;CUL1	23291;6500;8454;8945	542;163;776;605	0	1	0.5	2	0.5	3	3	14	573.5	2086	20	4
NA	527315	TNF-alpha/NF-kappa B signaling complex 5	10128;10788;10849;1147;23291;25885;3551;3838;4163;4528;4790;4791;4793;51082;5134;5437;5441;5966;5970;64425;6500;84172;8454;8517;9462	1394;1575;510;745;542;1720;756;529;1019;727;969;900;356;133;344;150;67;619;551;419;163;1135;776;487;1280	0	30	1	29	5	171	1	81	619	17866	311	25
NA	795348	TR-TRAP	10001;10025;1024;29079;51003;5469;7067;84246;892;9282;9412;9440;9442;9862;9967;9968;9969	246;877;464;270;131;1581;490;135;283;1454;144;651;311;989;955;2177;2174	0	17	0	17	2	180	3	77	490	13332	291	17
NA	3924	Rad17-RFC complex	5884;5982;5983;5984;5985	681;354;356;363;340	1	5	0	1	1	10	5	21	356	2094	37	5
NA	166490	VEGFR3 (dimer)/VEGFC/VEGFD	2277;2324;7424	354;1363;419	0	0	0	11	1	3	0	0	419	2136	14	3
NA	251694	IKBKB forms a complex with TANK and IKBKG	10010;3551;8517	425;756;487	0	1	1	4	18	46	6	15	487	1668	66	3
NA	8097	TRAF2:TRADD:RIP1:FADD	7186;8717;8737;8772	501;312;671;208	0	0	0	2	3.5	14	3.5	15	406.5	1692	31	4
NA	171414	RXR/RAR/HDAC3/NCOR2/SMRT	5914;6256;8841;9612	462;462;428;2524	0	8	1	7	7	96	0	1	462	3876	112	4
NA	131937	mTORC1 complex/14-3-3 family	2475;57521;64223;7531;84335	2549;1335;326;255;256	0	5	1	5	15	85	9	33	326	4721	128	5
NA	206228	eIF4A:eIF4G	1973;1974;1981;8672	406;407;1599;1585	2.5	12	1	4	5	41	6	29	996	3997	86	4
NA	528788	ITGA2B-ITGB3-FN1-TGM2 complex	2335;3674;3690;7052	2477;1039;788;687	0	0	2	7	3.5	12	0	1	913.5	4991	20	4
NA	169114	Angiotensin R/G-alpha-S/G-beta/G-gamma	186;2770;2782;2792	363;354;340;74	0	0	0	1	0	1	2	12	347	1131	14	4
NA	120170	E-cad-CTF2/p120 catenin/Kaiso	10009;1500;999	672;968;882	0	2	4	31	13	69	7	21	882	2522	123	3
NA	126866	PLCgamma1/betaPIX/GIT1	28964;5335;8874	770;1290;803	0	0	9	24	9	52	2	8	803	2863	84	3
NA	16972	ICOS:PI3K	29851;5290;8503	199;1068;461	0	0	1	6	1	2	0	0	461	1728	8	3
NA	117701	Eps8/ABI1/SOS1	10006;2059;6654	508;822;1333	0	0	8	19	22	61	0	2	822	2663	82	3
NA	171356	PIP2/AP180/AP2/EPSIN/Eps15/Amph1/2/dynamin	1173;160;1759;2060;274;29924;51411;8301	435;977;864;896;593;662;565;652	0	2	0.5	10	11	93	4	44	657	5644	149	8
NA	528150	Casein kinase II (beta-dimer; alpha-dimer)	1457;1460;58496	391;215;201	1	2	2	6	9	19	3	10	215	807	37	3
NA	119470	CD4/HIV Nef/AP2/vacuolar proton-transporting V-type ATPase complex/Coatomer protein complex/ARF1/GTP	1211;1212;1314;375;920	248;229;1233;181;458	0	1	1	8	2	15	1	32	248	2349	56	5
NA	523044	ERCC1-ERCC4-MSH2 complex	2067;2072;4436	297;916;934	1	3	0	0	3	7	2	11	916	2147	21	3
NA	168491	HDAC5/MEF2	10014;100271849;4207;729991	1123;368;365;119	0	1	0	0	0	17	0	2	366.5	1975	20	4
NA	799010	CAMK2.complex	815;816;817;818	489;666;499;556	0	0	1	4	16	63	1	5	527.5	2210	72	4
NA	206420	insulin receptor_p:Grb2:Sos	2885;3643;6654;6655	217;1382;1333;1332	0.5	5	4	21	6.5	31	1.5	9	1332.5	4264	66	4
NA	22064	activated TLR4:TRAM:TRIF:p-TBK1/p-IKKE:IRF3/IRF7	148022;23643;29110;353376;3661;51014;7099	712;160;729;235;427;224;839	0	1	0	5	2	24	1	15	427	3326	45	7
NA	236474	BTRC (E3RS) forms a complex with HNRNPU and NFKBIA	3192;4792;8945	825;317;605	0	14	2	11	8	23	5	24	605	1747	72	3
NA	530221	APLG1-Rababtin5 complex	164;79874;9135	825;569;862	1	3	0	3	0	11	1	4	825	2256	21	3
NA	118950	CaM/Ca2+/CAMKIIB/ASK1	4217;816;805	1374;666;149	0	4	1	3	11	31	1	5	666	2189	43	3
NA	39866	L1:Laminin	284217;3897;3912;3915	3075;1257;1786;1609	0	1	0.5	5	3	19	1.5	7	1697.5	7727	32	4
NA	133196	Ku/Artemis/DNA-PKcs (dimer)/Pol Mu/XRCC4 (dimer)/Ligase IV/Aprataxin	2547;27434;3981;54840;5591;64421;7518;7520	609;494;911;342;4128;692;336;732	0.5	38	0	8	8	74	2	178	650.5	8244	298	8
NA	40161	L1 dimer:Ankyrin:Spectrin:F-actin	288;3897;51332;6708	4377;1257;3639;2419	1.5	6	4.5	16	5	25	0.5	2	3029	11692	49	4
NA	170509	DR3/TRADD/FADD/TRAF2/RIP/Caspase 8/Caspase 10	7186;841;843;8717;8718;8737;8772	501;538;522;312;426;671;208	0	1	0	6	3	20	1	18	501	3178	45	7
NA	114585	netrin 1/DCC/UNC5C	1630;8633;9423	1447;931;604	0	0	1	4	0	3	0	0	931	2982	7	3
NA	531413	AP1 adaptor complex	10053;1174;130340;162;164;8905;8906;8907	423;158;154;949;825;157;785;435	0	3	0.5	8	0	5	3.5	35	429	3886	51	8
NA	238400	CFLAR forms a complex with FADD and FAS	355;8772;8837	335;208;480	0	0	0	3	3	11	1	4	335	1023	18	3
NA	130058	NGF (dimer)/p75(NTR)/TRAF6/RIP2/IRAK	3654;4803;4804;7189;8767	712;241;427;522;540	0	0	1	6	4	33	2	10	522	2442	49	5
NA	532537	PCNA-CHL12-RFC2-5 complex	5111;5982;5983;5984;5985;63922	261;354;356;363;340;975	1.5	8	0	3	1	19	5	31	355	2649	61	6
NA	11526	CDO:BOC:Trans-cadherin homodimer:catenin	1000;1499;50937;91653	906;781;1264;1114	0	3	3	16	0.5	23	0.5	14	1010	4065	56	4
NA	125700	Aurora A/RasGAP/Survivin	332;5921;6790	165;1047;403	0	0	4	8	5	26	0	1	403	1615	35	3
NA	793792	hMOF	10943;284058;3054;339287;55167;84148	521;1105;2035;351;577;467	1.5	12	0	4	7	55	0.5	11	549	5056	82	6
NA	63555	Axial/Lateral Element of Synaptonemal Complex	10274;10388;10734;10735;27127;50511;5885;8243;9126;9985	1258;1530;1225;1268;1235;236;631;1233;1217;547	0.5	16	2.5	23	6	67	0.5	68	1229	10380	174	10
NA	122177	IGF-1R heterotetramer/IGF1/IRS1/GRB2/Sos	2885;3479;3480;3667;6654	217;153;1367;1242;1333	1	7	5	30	12	83	0	7	1242	4312	127	5
NA	238351	Complex assembly of IL17RA; TRAF6 and TRAF3IP2	10758;23765;7189	565;866;522	0	0	1	3	0	0	0	2	565	1953	5	3
NA	131643	GMCSF/GMR alpha/CSF2RB (dimer)/LYN/SYK	1437;1438;1439;4067;6850	144;434;897;512;635	0	0	8	37	2	16	0	5	512	2622	58	5
NA	60498	IL2:IL2R trimer p-(Y338;Y392; Y510) beta subunit:p-JAK1:JAK3:p-STAT5	3558;3559;3560;3561;3640;3716;3718;6777	153;272;551;369;131;1154;1124;787	0	2	4	30	2	23	0	10	460	4541	65	8
NA	18739	TP receptor:Thromboxane A2:G-protein Gq (active)	2776;2790;548645;552891;59345;6915	359;68;360;153;340;407	0	1	0	0	0.5	9	0	2	349.5	1687	12	6
NA	119695	Insulin Receptor/Insuli/IRS1/GRB2/SHC	2885;3630;3643;3667;6464;723961	217;110;1382;1242;584;200	0.5	7	4	31	3.5	75	0.5	10	400.5	3735	123	6
NA	6091	RBL2:Cyclin E/A:CDK2	1017;5934;890	298;1139;432	1	5	1	7	6	46	2	15	432	1869	73	3
NA	530774	ITGAV-ITGB3-CD47-FCER2 complex	2208;3685;3690;961	321;1048;788;323	0	0	1	4	1.5	7	1.5	10	555.5	2480	21	4
NA	795446	Srb/Mediator	10001;1024;892;9282;9439;9443	246;464;283;1454;1368;233	0	2	0	2	2	21	4	24	373.5	4048	49	6
NA	253540	IL17RC-IL17F-IL17RA complex assembly	112744;23765;84818	163;866;791	0	0	1	2	0	0	0	1	791	1820	3	3
NA	22789	CD4:Vpu:beta-TrCP_1:Skp1 complex	6500;8945;920	163;605;458	0	1	0	1	2	4	0	5	458	1226	11	3
NA	9010	STAT1 bound to p-IFNGR1	3458;3459;3460;3716;3717;6772	166;489;337;1154;1132;750	0	2	3.5	28	1	13	1.5	17	619.5	4028	60	6
NA	114600	FRS2 family/SHP2/CRK family/C3G/GAB2	10817;1399;2889;5781;9846	492;303;1095;593;676	0	2	6	33	8	49	0	2	593	3159	86	5
NA	22035	TRIF:TRAM:activated TLR4	148022;23643;353376;51014;7099	712;160;235;224;839	0	0	0	3	1	6	0	5	235	2170	14	5
NA	121780	alphaM/beta2 Integrin/Factor X	2159;3684;3689	488;1152;769	0	0	0	0	3	8	0	1	769	2409	9	3
NA	525764	TFIID-beta complex	51616;6872;6874;6877;6878;6879;6880;6881;6882;6883;6884;6908	251;1893;1085;800;677;349;264;218;211;161;124;339	0	2	0	6	2.5	51	0	6	301.5	6372	65	12
NA	131472	RET51/GFRalpha1/GDNF/PKC alpha	2668;2674;5578;5979	228;465;672;1114	0	4	2	21	1	15	0	1	568.5	2479	41	4
NA	197724	CD3:zap-70	7535;915;916;917;919	619;171;207;182;164	0	1	2	28	2	13	0	0	182	1343	42	5
NA	15822	NFKB p105:TPL2:ABIN2	1326;4790;79155	467;969;429	0	3	0	2	7	24	0	5	467	1865	34	3
NA	172627	HDAC/HDAC2/MEF2D/CABIN1	23523;3065;3066;4209	2220;482;582;521	1.5	12	1	3	6	30	4.5	17	551.5	3805	62	4
NA	51886	Ubiquinol-cytochrome c reductase	10975;1537;27089;29796;440567;7381;7384;7385;7386;7388	56;325;82;63;91;111;480;453;274;91	0	5	0	5	0	8	1	20	101	2026	38	10
NA	115496	Laminin 6	3909;3912;3915	3333;1786;1609	0	0	1	3	5	10	3	7	1786	6728	20	3
NA	170089	TNF-beta/TNF R2/RIP/TRAF1/TRAF2/TRAF3/I-TRAF	10010;4049;7133;7185;7186;7187;8737	425;205;461;416;501;568;671	0	0	0	2	3	33	3	26	461	3247	61	7
NA	523005	EXO1-MLH1-PMS2 complex	4292;5395;9156	756;862;846	1	2	1	2	7	26	1	4	846	2464	34	3
NA	197805	Rac:GDP	5879;5880;5881	211;192;192	0	1	2	5	1	4	5	16	192	595	26	3
NA	63814	Integrin alphaIIb beta3:Active (p-Y419)-SRC	3674;3690;6714	1039;788;536	0	0	2	10	4	15	0	0	788	2363	25	3
NA	204289	PDGFR-bb:SHP-2	1436;5159;5781	972;1106;593	0	2	9	34	5	13	1	6	972	2671	55	3
NA	530977	BRG1-SIN3A complex	10419;25942;3066;5928;6597;6598;6599;6601;6602;6603;6604;6605;8289;86	637;1273;582;425;1679;385;1105;1214;515;531;483;411;2285;429	1	25	1	25	5	129	6.5	88	556.5	11954	267	14
NA	170927	B2AR/G-alpha-s/G-gamma/G-beta/GDP	154;2778;2782;2792	413;1037;340;74	0	0	1.5	9	1.5	19	2	19	376.5	1864	47	4
NA	522720	CPSF6-ITCH-NUDT21-POLR2A-UBAP2L complex	11051;11052;5430;83737;9898	227;551;1970;862;1087	0	7	5	27	9	95	7	55	862	4697	184	5
NA	245717	Heterodimer STAT1 and STAT2 forms a complex with KPNA1	3836;6772;6773	538;750;851	2	4	2	5	1	4	4	15	750	2139	28	3
NA	129510	RXRs/RARs/NRIP1/9cRA	5915;6256;8204	448;462;1158	0	8	1	2	7	19	0	3	462	2068	32	3
NA	521968	TFTC complex (TATA-binding protein-free TAF-II-containing complex)	10474;10629;23450;2648;27097;51616;6314;6873;6874;6877;6878;6879;6880;6881;6883;8295;8464	432;622;1217;837;589;251;945;1199;1085;800;677;349;264;218;161;3830;317	0	9	0	5	2	62	0	32	622	13793	108	17
NA	61041	pSIRP-A:PYK2	140885;2185;961	504;1009;323	0	0	4	17	0	27	2	6	504	1836	50	3
NA	4196	hBUBR1:hBUB3:MAD2*:CDC20 complex	4085;701;9184;991	205;1050;328;499	0.5	2	1	4	7.5	32	4	26	413.5	2082	64	4
NA	2597	Basigin:CD98hc complex	6520;682;9057	661;385;515	0	0	0	1	3	15	9	26	515	1561	42	3
NA	129086	S1P/S1P4/G12/G13	10672;2768;8698	377;381;384	0	0	0	1	2	7	2	5	381	1142	13	3
NA	793989	mSin3A	23450;25942;3065;3066;51742;5928;5931;64426	1217;1273;482;582;1312;425;425;328	2.5	25	1	7	6.5	77	5	38	532	6044	147	8
NA	125372	Insulin Receptor/Insuli/IRS1/GRB2/SHC/PTP1B	2885;3630;3643;3667;5770;6464;723961	217;110;1382;1242;435;584;200	0	7	5	37	6	83	1	11	435	4170	138	7
NA	529933	BRAF53-BRCA2 complex	10362;23028;23186;3065;3066;51317;675	317;876;482;482;582;680;3418	1	13	1	7	5	43	2	28	582	6837	91	7
NA	126613	netrin 1/DCC/UNC5C/FAK/Src-Yes-Fyn	1630;2534;5747;8633;9423	1447;537;1074;931;604	0	0	2	30	3	43	0	0	931	4593	73	5
NA	167107	CD40/CD40L/TRAF3/TRAF6	7187;7189;958;959	568;522;277;261	0	0	0	2	0.5	3	1	5	399.5	1628	10	4
NA	193814	CD79A;CD79B;CD19;BTLA	151888;930;973;974	289;556;226;230	0	0	3	13	0.5	5	0	1	259.5	1301	19	4
NA	123837	alpha2/beta1 Integrin/Type IV Collagen	1285;3673;3688	1670;1181;801	0	0	0	4	3	10	2	10	1181	3652	24	3
NA	131623	ILK/PINCH1/beta parvin/alpha-actinin	29780;3611;3987;87	397;452;325;914	0	5	0.5	5	2.5	10	1.5	13	424.5	2088	33	4
NA	204522	(PDGF:PDGF Receptor_p):(Grb2:Sos)	2885;5154;5155;5156;5159;6654;6655	217;211;241;1089;1106;1333;1332	0	4	3	42	1	16	0	7	1089	5529	69	7
NA	10908	Sar1p:GTP:Sec23p:Sec24p:Ag bound MHC class I	10484;3106;3107;51128;567;9632	765;362;366;198;119;1094	0	1	0.5	6	1	6	3	18	364	2904	31	6
NA	129094	alpha4/beta1 Integrin/VCAM1/ABI1	10006;3676;3688;7412	508;1032;801;739	0	0	3	15	3.5	36	1	9	770	3080	60	4
NA	527982	ITGA2B-ITGB3-F11R complex	3674;3690;50848	1039;788;299	0	0	2	5	4	13	0	4	788	2126	22	3
NA	119986	RELN/VLDLR/DAB1/LIS1	1600;5048;5649;7436	555;410;3460;873	0.5	2	2	9	1	4	0.5	5	714	5298	20	4
NA	117708	TCR/CD3/MHC II/CD4/LCK/ZAP-70	3122;3123;3932;7535;915;916;917;919;920	254;266;509;619;171;207;182;164;458	0	2	2	32	2	26	0	5	254	2830	65	9
NA	524945	RNA polymerase II complex; chromatin structure modifying	1024;10589;2959;2960;2962;2965;5430;54760;6595;6597;6598;6599;6601;6602;6603;6604;6908;892;9412	464;205;316;439;517;548;1970;755;1590;1679;385;1105;1214;515;531;483;339;283;144	1	28	1	31	2	192	3	110	515	13482	361	19
NA	124667	RB1/E2F1-3/DP/HDAC1	1870;3065;5925;7027	437;482;928;410	5	20	1	8	4	39	2	12	459.5	2257	79	4
NA	11324	IGF:IGFBP-5:ALS Complex	3481;3483;3488	236;643;272	0	0	0	1	0	2	0	0	272	1151	3	3
NA	533214	CTGF/Hcs24-actin complex	1490;60;71	349;375;375	5	10	11	22	9	20	10	21	375	1099	73	3
NA	115980	FA core complex	2175;2176;2178;2187;2188;2189;29089;3280;55120;7415;80233	1455;558;536;859;374;622;197;280;380;806;730	0	21	0	10	2	71	2	55	558	6797	157	11
NA	10654	RNA Pol II (hypophosphorylated) complex bound to DSIF protein	22916;2962;2963;4686;5430;5431;5432;5433;5434;5435;5436;5437;5438;5439;5440;5441;6827;6829;9150	156;517;249;790;1970;1174;275;142;210;127;172;150;125;117;58;67;117;1087;961	0	13	0	30	1	117	3	115	172	8464	275	19
NA	39385	Plexin-A1:Sema6D:Trem2:DAP12	5361;54209;7305;80031	1896;230;113;1073	0	0	2	8	1	4	0	2	651.5	3312	14	4
NA	32557	U4 ATAC:U5:U6 ATAC Complex	10594;10907;23020;24148;4809;57819;6628;6632;6633;6634;6635;6636;6637;9343;9410;9416	2335;142;2136;941;128;95;240;119;118;126;92;86;76;972;357;820	0	11	1	29	1	43	3	119	135	8783	202	16
NA	122523	RET9/GFRalpha1/GDNF/FRS2	10818;2668;2674;5979	508;228;465;1114	0	0	2.5	22	1	17	0	0	486.5	2315	39	4
NA	63082	SREBF1:NF-Y:SP1:DNA	4800;4801;4802;6667;6720	347;207;354;785;1177	0	3	0	2	2	39	1	13	354	2870	57	5
NA	119254	EGFR/EGFR/EGF/EGF/ARFGEP100	1950;1956;9922	1207;1210;1114	0	3	2	19	9	42	0	17	1207	3531	81	3
NA	185152	EFCAB6;SIN3A;HDAC1	25942;3065;64800	1273;482;1501	5	19	2	6	6	22	4	12	1273	3256	59	3
NA	48678	Ub-ERBB3	2065;6233;7311;7314;7316	1342;156;128;229;685	3	16	1	16	4	17	8	36	229	2540	85	5
NA	251863	STAT1 and STAT3 complex with the IRF1 promoter	3659;6772;6774	325;750;770	2	5	3	11	1	8	9	18	750	1845	42	3
NA	122349	KLHL12/Cul3/DVL	1856;59349;8452	736;568;768	0	0	2	8	5	16	3	13	736	2072	37	3
NA	532623	p16-cyclin D2-CDK4 complex	1019;1029;894	303;156;289	0	1	0	1	3	9	3	9	289	748	20	3
NA	53016	eNOS:Caveolin-1:NOSTRIN complex	115677;4846;857	506;1203;178	0	1	2	6	6	17	3	10	506	1887	34	3
NA	122426	IL1 beta fragment/IL1R1/IL1RAP/MYD88/IRAK4/IRAK/TOLLIP	3553;3554;3556;3654;4615;51135;54472	269;569;570;712;309;460;274	0	2	1	7	1	29	0	11	460	3163	49	7
NA	184251	Cadherin/beta-catenin/alpha-catenin/alpha-catenin/alpha-catenin/vinculin/actin	1495;1499;58;7414;999	906;781;377;1134;882	3	15	6	35	14	70	12	51	882	4080	171	5
NA	119732	GNA14/GDP/G beta/gamma	2782;54331;9630	340;71;355	0	0	0	0	0	1	0	4	340	766	5	3
NA	170865	Ligand/GPCR/G-alpha-q	2776;6351;9560	359;92;92	0	1	0	0	0	2	0	2	92	543	5	3
NA	115324	alphav/beta3 Integrin/Osteopontin	3685;3690;6696	1048;788;314	0	0	2	4	4	50	0	7	788	2150	61	3
NA	167974	Sumo target protein/SUMO2/3/SUMO2/3/SUMO2/3/SUMO1	6612;6613;7341	103;95;101	3	7	0	0	2	7	4	12	101	299	26	3
NA	533076	ITGA6-ITGB4-LAMA5 complex	3655;3691;3911	1091;1822;3695	0	0	1	18	20	68	5	21	1822	6608	107	3
NA	246641	NFATC2 and JUN form a complex with TAF4	3725;4773;6874	331;925;1085	0	3	1	3	15	53	0	1	925	2341	60	3
NA	526355	6S methyltransferase and RG-containing Sm proteins complex	1207;6628;6632;6633;6634;6635;6636;6637	237;240;119;118;126;92;86;76	0	4	0	8	1	12	3	19	118.5	1094	43	8
NA	126577	CD44/Rho Family GTPase/ROCK2	9475;960;998	1388;742;191	0	2	3	6	10	21	5	15	742	2321	44	3
NA	523600	Axin-p53-HIPK2 complex	28996;7157;8312	1198;393;862	0	13	3	7	11	42	8	26	862	2453	88	3
NA	45134	CBL:Beta-Pix:CDC42:GTP	867;8874;998	906;803;191	1	3	3	14	9	20	2	8	803	1900	45	3
NA	521749	RHOA-IP3R-TRPC1 complex	3708;387;7220	2710;193;759	0	1	3	8	1	10	0	3	759	3662	22	3
NA	124986	IL1 beta fragment/IL1R1/IL1RAP/TICAM2/IRAK4	353376;3553;3554;3556;51014;51135	235;269;569;570;224;460	0	2	1	6	1	20	0	4	364.5	2327	32	6
NA	200455	GHR:JAK2:SOCS-2	2690;3717;8835	638;1132;198	0	0	5	20	1	3	0	0	638	1968	23	3
NA	130311	ETA receptor/Endothelin-1/Gq/GTP	1906;1909;2769	212;427;374	0	0	0	2	1	14	0	0	374	1013	16	3
NA	128391	p38alpha-beta/MAPKAPK2/TCF3	1432;6929;9261	360;654;400	0	2	3	8	10	30	0	2	400	1414	42	3
NA	20901	oligo-MyD88:activated TLR7-9	11344;4615;54106	349;309;1032	0	2	1	2	0	2	0	1	349	1690	7	3
NA	125147	RPA/ATR/ATRIP/RAD17/RFC2-5/9-1-1/TopBP1/SMARCAL1	11073;3364;50485;545;5810;5883;5884;5982;5983;5984;5985;6117;6118;84126	1522;280;954;2644;282;391;681;354;356;363;340;616;270;791	0	10	0.5	13	4	81	3	58	377	9844	162	14
NA	123976	SMAD2-3/SMAD4/FOXO1-3a-4/FOXG1	2290;4088;4089;4303	489;425;552;505	3	11	0	1	7	26	0	3	497	1971	41	4
NA	237893	TRAF1;TRAF2 homodimer form a complex with BIRC3 (cIAP2)	330;7185;7186	604;416;501	0	0	0	0	3	10	3	11	501	1521	21	3
NA	1977	SL1	9013;9014;9015	869;588;450	0	1	0	1	0	5	3	8	588	1907	15	3
NA	122515	IGF-1R heterotetramer/IGF1/GRB2/Sos/Shc	2885;3479;3480;6464;6654	217;153;1367;584;1333	0	5	3	21	6	38	1	8	584	3654	72	5
NA	131713	IL2/IL2R alpha/beta/gamma/JAK1/LCK/JAK3/SHC/GRB2/SOS1/GAB2/ERK1-2	2885;3558;3559;3560;3561;3640;3716;3718;3932;5595;6464;6654;9846	217;153;272;551;369;131;1154;1124;509;379;584;1333;676	0	5	3	46	4	77	0	20	509	7452	148	13
NA	798201	Beclin-1 complex.complex	30849;51100;5289;55626;7405;8678	1358;365;887;1208;699;450	0	2	1	10	12	65	1.5	20	793	4967	97	6
NA	21968	FSH receptor:FSH	1081;2488;2492	116;129;695	0	0	0	1	0	1	0	0	129	940	2	3
NA	199472	PI3-kinase	5290;5291;5293;5295	1068;1070;1044;724	0	1	6	26	1.5	10	2	9	1056	3906	46	4
NA	124312	SIN3/HDAC complex/Mad/Max	10284;23309;25942;3065;3066;4084;4149;5928;5931;8819	172;1162;1273;482;582;221;160;425;425;220	2	26	1	12	4.5	56	3	32	425	5122	126	10
NA	533383	SHARP-CtBP complex	1487;1488;23013	440;985;3664	0	5	2	6	5	84	2	16	985	5089	111	3
NA	523959	MSH4-MSH5-GPS2 complex	2874;4438;4439	327;936;835	0	0	0	1	0	3	1	3	835	2098	7	3
NA	258341	TNFAIP3 (A20) forms a complex with TAX1BP1 and TRAF6	7128;7189;8887	790;522;789	0	1	1	3	6	16	5	15	789	2101	35	3
NA	196811	BMPR:XIAP:TAB1	10454;331;657;658;659	504;497;532;502;1038	0	0	0	4	4	24	1	9	504	3073	37	5
NA	130544	IL3/IL3RA/CSF2RB (dodecamer)/JAK2/JAK2/SHC/SHIP	1439;3562;3563;3635;3717;6464	897;152;378;1189;1132;584	0	1	4.5	32	1.5	13	0	3	740.5	4332	49	6
NA	9128	ceramide:CERT:PPM1L:VAPA/B trimer	10087;151742;9217	752;360;243	0	1	0	0	9	18	1	3	360	1355	22	3
NA	10803	MHC class I HC:Calnexin/BiP:Erp57	2923;3106;3107;3309	505;362;366;654	2	21	1.5	7	2.5	12	7.5	39	435.5	1887	79	4
NA	125219	alpha1/beta1 Integrin/Type VI Collagen	1291;1292;1293;3672;3688	1028;1019;3177;1179;801	0	1	1	7	0	7	1	13	1028	7204	28	5
NA	21309	GRB2:SOS1:p-Y349;350-SHC1:p-ERBB4	2066;2885;6464;6654;9542	1308;217;584;1333;858	0	6	3	32	2	22	1	9	858	4300	69	5
NA	524555	IKB(beta)-RELA-cREL complex	4793;5966;5970	356;619;551	0	7	0	4	6	21	0	0	551	1526	32	3
NA	116899	SMAD2-3/SMAD4/SP1	4087;4089;6667	467;552;785	4	10	0	1	14	45	0	3	552	1804	59	3
NA	21455	ACVR1B:ACVR2:EGF-CFC	6997;91;93	188;505;512	0	0	0	1	0	0	0	0	505	1205	1	3
NA	123083	IRAK/TRAF6/MEKK3	3654;4215;7189	712;657;522	0	0	2	7	10	38	2	7	657	1891	52	3
NA	17734	VLA-4:VCAM-1	3676;3688;7412	1032;801;739	0	0	2	7	3	9	2	9	801	2572	25	3
NA	63765	CENP-(H;I; K) complex	2491;64105;64946	756;269;247	0	0	0	0	2	9	1	3	269	1272	12	3
NA	170330	eIF-4G/eIF-4E/PTB	1977;1981;1982;5725;8672	248;1599;907;557;1585	1	8	1	5	9	62	4	28	907	4896	103	5
NA	47931	SHC:activated insulin receptor	3630;3643;6464;723961	110;1382;584;200	0	1	1.5	14	3	23	0.5	4	392	2276	42	4
NA	55207	Nephrin dimer:IQGAP1	4868;55243;58510;8826	1241;757;536;1657	0	0	7.5	33	2.5	14	0.5	22	999	4191	69	4
NA	526381	SMG-1-Upf1-eRF1-eRF3 complex (SURF)	2107;23049;23708;2935;5976	437;3661;628;637;1118	2	13	0	9	2	26	4	26	637	6481	74	5
NA	169199	collagen IV	1282;1284;1285;1286;1287;1288	1669;1712;1670;1690;1691;1691	0	0	0.5	4	1	9	0	2	1690.5	10123	15	6
NA	2652	pol II transcription complex containing 4 nucleotide long transcript	1022;2068;2071;2957;2958;2960;2961;2962;2963;2965;2966;2967;2968;4331;5430;5431;5432;5433;5434;5435;5436;5437;5438;5439;5440;5441;6872;6874;6875;6877;6878;6880;6881;6882;6883;6884;6908;902	346;760;782;376;109;439;291;517;249;548;395;308;462;309;1970;1174;275;142;210;127;172;150;125;117;58;67;1893;1085;862;800;677;264;218;211;161;124;339;323	0	13	0	37	1	154	1	136	308.5	17435	340	38
NA	195292	CRKL;STAT5A;STAT5B	1399;6776;6777	303;794;787	2	4	6	22	7	20	1	2	787	1884	48	3
NA	530141	SKI-NCOR1-SIN3A-HDAC1 complex	25942;3065;6497;9611	1273;482;728;2440	3.5	18	2	8	10	68	3	15	1000.5	4923	109	4
NA	523153	MAP2K1-BRAF-RAF1-YWHAE-KSR1 complex	5604;5894;673;7531;8844	393;648;766;255;762	0	5	1	5	15	94	0	21	648	2824	125	5
NA	243699	PLA2G4A forms a complex with CYBB; NCF2; NCF1	1536;4688;5321;653361	570;526;749;390	0	0	1	5	8	33	0.5	3	548	2235	41	4
NA	521356	RAD17-RFC-9-1-1 checkpoint supercomplex	3364;5810;5883;5884;5982;5983;5984;5985	280;282;391;681;354;356;363;340	0	5	0	2	1.5	23	3.5	23	355	3047	53	8
NA	119072	alpha4/beta1 Integrin/EWI2	3676;3688;93185	1032;801;613	0	0	1	5	3	8	2	9	801	2446	22	3
NA	133137	alpha6/beta1 Integrin/Thrombospondin-2	3655;3688;7058	1091;801;1172	0	0	1	5	4	24	5	12	1091	3064	41	3
NA	169970	IL-7/IL-7Ra/IL-2R-gamma/JAK1	3561;3674;3716	369;1039;1154	0	0	4	9	2	8	2	7	1039	2562	24	3
NA	131755	GR alpha/HSP90/FKBP51/HSP90/PP5C	2289;2908;3320;5536	457;778;854;499	2.5	29	1	12	8.5	34	4.5	39	638.5	2588	114	4
NA	132795	FGFR1-FGF complex/Sef	2246;2260;54756	155;822;739	0	2	1	14	0	6	0	0	739	1716	22	3
NA	5885	cofactor A:GTP:beta-tubulin folding intermediate	10381;4157;6902	450;317;108	1	3	1	7	3	13	5	12	317	875	35	3
NA	527443	UTX-MLL2/3 complex	11091;22976;23054;23528;55291;55728;58508;5929;7403;80209;8085;9070	334;1069;2063;895;793;1770;4911;538;1401;944;5537;628	0	26	0.5	13	5	114	1	25	1006.5	20883	178	12
NA	524903	ArgBP2a-CBL-PTK2B complex	2185;8470;867	1009;1100;906	0	1	10	24	26	64	0	2	1009	3015	91	3
NA	2013	Acetylayed SL1:PhosUBF-1:rDNA promoter	7343;9013;9014;9015	764;869;588;450	0.5	2	0	1	2.5	21	4	13	676	2671	37	4
NA	17428	RBX1-CUL7-SKP1-FBXW8	26259;6500;9820;9978	598;163;1698;108	0	1	0	0	2	7	3	12	380.5	2567	20	4
NA	131796	BRCA1/BARD1/UbcH7	580;672;7332	777;1884;154	2	5	0	1	13	64	3	16	777	2815	86	3
NA	117605	ETA receptor/Endothelin-1/Gq/GTP/PLC beta	1906;1909;23236;9630	212;427;1216;355	0	3	1	5	5.5	24	0	0	391	2210	32	4
NA	533827	PU.1-SIN3A-HDAC complex	25942;3065;6688	1273;482;271	5	14	1	4	6	21	4	12	482	2026	51	3
NA	20443	TFIIIC	2975;2976;9328;9329;9330	2109;911;526;822;886	0	0	1	8	2	36	7	37	886	5254	81	5
NA	114962	HES1/RB1/RUNX2	3280;5925;860	280;928;521	0	7	0	6	13	46	2	5	521	1729	64	3
NA	531446	CtBP complex	10919;1487;1488;23028;23186;3065;3066;55758;6239;6935;7764;79813;84458;8535;9425;9658;9839	1210;440;985;876;482;482;582;553;1742;1124;1048;1298;433;560;544;1163;1214	0	16	0	15	9	172	2	49	876	14736	252	17
NA	171324	IL-1-beta/IL-1RI/IL-1RAcP/TOLLIP/MYD88/IRAKs	11213;3553;3554;3556;4615;54472	596;269;569;570;309;274	0	0	1	7	0.5	17	0.5	8	439	2587	32	6
NA	132008	RELN/LRP8/DAB1/Fyn/MAPK8IP1/MKK7/MAP3K11/JNK1	1600;2534;4296;5599;5609;5649;7804;9181;9479	555;537;847;427;419;3460;963;986;711	0	3	2	22	8	132	0	8	711	8905	165	9
NA	55114	Nephrin dimer:NEPH2/NEPH3	4868;58510;84063	1241;536;708	0	0	1	3	3	6	0	0	708	2485	9	3
NA	27248	Ligand:GPCR complexes that activate G12/13:Heterotrimeric G-protein G12/13 (active).	148;2768;2783;2790;548645;552891	475;381;340;68;360;153	0	0	0	1	0.5	6	0	6	350	1777	13	6
NA	118161	alpha4/beta1 Integrin/CSPG4	1464;3676;3688	2322;1032;801	0	0	1	5	3	9	2	9	1032	4155	23	3
NA	196805	BMPR:XIAP	331;657;658;659	497;532;502;1038	0	0	0.5	4	3	18	0.5	8	517	2569	30	4
NA	530831	ELK1-SRF-ELK3 complex	2002;2004;6722	428;407;508	0	0	0	1	10	31	0	1	428	1343	33	3
NA	19270	Talin:RIAM complex: ECM ligands:Integrin alphaIIb beta3:Active (p-Y419)- SRC:FADK1	3674;3690;54518;5747;5908;6714;7094;7450	1039;788;666;1074;184;536;2541;2813	0	3	2	40	4.5	59	0.5	10	913.5	9641	112	8
NA	131749	WNT3A/FZD1/LRP6	4040;8321;89780	1613;647;352	0	0	1	7	0	10	1	3	647	2612	20	3
NA	8957	IFNGR1:JAK1:INFG2:JAK2	3459;3460;3716;3717	489;337;1154;1132	0	0	4	23	2.5	12	1.5	8	810.5	3112	43	4
NA	66135	AP-1 Complex	162;164;8905;8907	949;825;157;435	0.5	3	2	7	0.5	4	3	11	630	2366	25	4
NA	129155	proNGF (dimer)/p75(NTR)/Sortilin/TRAF6/NRIF	10782;4803;4804;6272;7189	653;241;427;831;522	0	0	0	3	1	6	0	2	522	2674	11	5
NA	127429	FANCG/BRCA2/FANCD2/XRCC3	2177;2189;675;7415;7517	1471;622;3418;806;346	0	21	1	12	13	86	1	45	806	6663	164	5
NA	4326	Cdc20:phosph-APC/C:Securin complex	10393;11065;246184;29882;29945;51433;51434;51529;64682;7321;7324;8697;8881;9232;991;996	185;179;85;822;808;755;599;196;1944;147;193;597;620;202;499;830	0	6	1	12	6	146	4.5	95	548	8661	259	16
NA	132655	IL4/IL4R/JAK1/IL2R gamma/JAK3/Dok-R	3561;3565;3566;3640;3716;3718;9046	369;153;825;131;1154;1124;412	0	0	4	24	1	13	1	12	412	4168	49	7
NA	533895	p400-associated complex	10856;51412;57634;60;8295;86;8607	463;426;3122;375;3830;429;456	2	17	1	17	2	51	9	62	456	9101	147	7
NA	526896	PPD complex	11315;5071;65018	189;465;581	0	1	1	3	0	5	0	2	465	1235	11	3
NA	202413	JAK2:IL-5R:JAK1:Shc	1439;25759;3568;3716;3717;53358;6464	897;582;420;1154;1132;594;584	0	0	4	40	1	15	0	6	594	5363	61	7
NA	521880	CRM1-RAN-PHAX-CBC complex (cap binding complex)	22916;4686;51808;5901;7514	156;790;394;216;1071	2	15	1	7	5	26	2	19	394	2627	67	5
NA	49657	Integrin alphaVbeta3:Fibronectin	2335;3685;3690	2477;1048;788	0	0	2	6	4	12	1	8	1048	4313	26	3
NA	257919	IKBKB forms a complex with MAP3K13 and PRDX3	10935;3551;9175	256;756;966	1	4	0	3	0	18	1	6	756	1978	31	3
NA	48731	NRG1/2:Ub-p-10Y-ERBB3:p-ERBB2	2064;2065;6233;7311;7314;7316;9542	1255;1342;156;128;229;685;858	3	16	1	28	4	31	8	43	685	4653	118	7
NA	525276	Ubiquitin E3 ligase (CSN1; CSN8; HRT1; SKP1; SKP2; CUL1; CUL2; CUL3)	10920;2873;6500;6502;8452;8453;8454;9978	209;527;163;424;768;745;776;108	0	3	0	5	2	25	4.5	40	475.5	3720	73	8
NA	238814	PTCH1 (PTC) forms a complex with FHL2 (DRAL); CARD8 (TUCAN) and CASP9	2274;22900;5727;842	279;537;1447;416	0	0	1	4	0.5	10	0.5	2	476.5	2679	16	4
NA	795438	CUL4/DDB1	1642;2873;51514;8450;9318	1140;527;730;913;450	0	4	1	8	6	54	10	51	730	3760	117	5
NA	7020	DNA polymerase alpha:primase	23649;5422;5557;5558	598;1462;420;509	0.5	2	1	4	5	23	6	23	553.5	2989	52	4
NA	124535	nectin-3(dimer)/I-afadin/I-afadin/nectin-2(dimer)/I-afadin/I-afadin	25945;4301;5819	549;1651;538	0	0	6	27	4	27	0	4	549	2738	58	3
NA	124979	E2F2/DP/RYBP/YY1	1870;23429;7027;7528	437;228;410;414	1	5	1	4	4.5	23	2	8	412	1489	40	4
NA	167696	TLR2/TLR6 activating compounds/TLR2/TLR6/MYD88/IRAK/CD14	10333;3654;4615;7097;929	796;712;309;784;375	0	0	0	1	0	10	0	6	712	2976	17	5
NA	169521	GABA receptor/GABARAP/NSF	11337;2554;2555;2556;2557;2558;2559;4905	117;456;451;492;554;462;453;744	0	1	0.5	7	0.5	6	0	2	459	3729	16	8
NA	51820	Succinate dehydrogenase complex (reduced)	6389;6390;6391;6392	664;280;169;159	0	6	0	1	0.5	3	2	10	224.5	1272	20	4
NA	522911	RNF11-SMURF2-STAMBP complex	10617;26994;64750	424;154;748	0	0	0	0	1	6	0	2	424	1326	8	3
NA	523817	Ubiquitin E3 ligase (SKP1A; SKP2; CUL1; CKS1B; RBX1)	1163;6500;6502;8454;9978	79;163;424;776;108	0	1	0	3	2	12	2	17	163	1550	33	5
NA	18754	TP receptor:Thromboxane A2:G-protein G13 (active)	10672;2783;2790;548645;552891;6915	377;340;68;360;153;407	0	0	0	2	0.5	10	0	7	350	1705	19	6
NA	43840	Cyclin E:Cdk2:p21/p27 complex	1017;1026;898	298;164;410	1	5	0	5	8	25	6	18	298	872	53	3
NA	171188	IFN-gamma/IFN-gamma R-alpha/IFN-gamma R-beta/JAK2	3458;3459;3717	166;489;1132	0	0	4	21	1	5	0	3	489	1787	29	3
NA	64048	Heterotrimeric G-protein Gs (active)	2778;2790;548645;552891;59345	1037;68;360;153;340	0	0	0	2	0	3	0	15	340	1958	20	5
NA	533149	CRSP complex	10001;51586;5469;81857;9282;9412;9439;9440;9441;9443;9862	246;788;1581;747;1454;144;1368;651;600;233;989	0	11	0	4	2	92	2	49	747	8801	156	11
NA	54367	High affinity IL-5 receptor complex dimer; inactive JAK2; phosphorylated Bc:SHC1	1439;3567;3568;3717;6464	897;134;420;1132;584	0	0	3	27	1	9	0	1	584	3167	37	5
NA	19168	Integrin alphaIIb beta3:p(Y530)-SRC:CSK	1445;3674;3690;6714	450;1039;788;536	0	0	3	14	2.5	16	0	1	662	2813	31	4
NA	101941	Phospho-R-Smad:Co-Smad	4089;4090;6497	552;465;728	2	7	0	0	5	15	2	5	552	1745	27	3
NA	120777	CDK4-6/Cyclin D/p16INK4a	1019;1029;595	303;156;295	0	1	1	2	4	11	6	12	295	754	26	3
NA	118248	ILK/PINCH1/alpha parvin	3611;3987;55742	452;325;372	0	0	0	1	5	14	0	10	372	1149	25	3
NA	168783	G-protein receptor/G-gamma/G-beta/G-alpha-S/GDP	1128;2778;2782;2792	460;1037;340;74	0	0	0.5	3	1.5	7	2	19	400	1911	29	4
NA	794191	CDC5/Prp19	10286;27339;3312;51503;5356;56259;988	225;504;646;229;514;563;802	1	17	1	13	6	60	4	62	514	3483	152	7
NA	16516	Ubiquitinated NRIF:Sequestosome	23421;6233;7311;7314;7316;8878	177;156;128;229;685;440	3	16	1	7	4	55	8	46	203	1815	124	6
NA	201748	IL-4:JAK1:IL-13RA-1:IL-4R alpha:TYK2	3565;3566;3597;3716;7297	153;825;427;1154;1187	0	0	4	16	1	10	1	8	825	3746	34	5
NA	122825	SMAD3/SMAD4/TFE3	4088;4089;7030	425;552;575	3	8	0	0	8	23	0	3	552	1552	34	3
NA	49104	TGFB1:p-TGFBR:I-SMAD	4092;7040;7046;7048	426;390;503;592	0	2	0	4	6	23	1	4	464.5	1911	33	4
NA	125185	E2F4/DP2/p107-p130/HDAC1	1874;3065;5933;7029	413;482;1068;386	0.5	10	0.5	2	4.5	29	1	10	447.5	2349	51	4
NA	525657	ATR-HDAC2-CHD4 complex	1108;3066;545	1912;582;2644	2	11	3	8	8	54	9	29	1912	5138	102	3
NA	41453	NGF ligand:p75NTR:Phospho-IRAK1:TRAF6:p62:IKK-beta	3551;3654;4803;4804;7189;8878	756;712;241;427;522;440	0	1	1.5	9	7	68	1.5	18	481	3098	96	6
NA	528744	CD19-Vav-PI 3-kinase (p85 subunit) complex	5295;7409;930	724;845;556	1	4	10	30	4	10	0	8	724	2125	52	3
NA	57958	ubiquitinated phospho-COP1(ser-387)	6233;64326;7311;7314;7316	156;731;128;229;685	3	16	1	4	4	15	8	37	229	1929	72	5
NA	23490	IPAF elicitors:NLRC4:Procaspase-1	440068;58484;834	110;1024;404	0	0	0	0	0	1	0	0	404	1538	1	3
NA	54769	PEX19:ABCD1/2/3	215;5824;5825	745;299;659	0	2	0	2	1	10	7	19	659	1703	33	3
NA	171792	PA700 base	5710;6184;6185	377;607;631	1	2	1	3	1	8	11	37	607	1615	50	3
NA	124226	alpha5/beta1 Integrin/COL18A1	3678;3688;80781	1049;801;1751	0	0	0	4	2	6	2	9	1049	3601	19	3
NA	57429	CD4:Nef:AP-2 Complex:v-ATPase Complex	1173;1175;160;163;51606;920	435;142;977;951;483;458	0	5	0.5	8	3.5	25	5.5	33	470.5	3446	71	6
NA	128521	alphaM/beta2 Integrin/LRP/tPA	3684;3689;4035;5327	1152;769;4544;562	0	0	0	2	4	15	0	1	960.5	7027	18	4
NA	54470	High affinity GM-CSF receptor complex dimer; inactive JAK2; phosphorylated Bc:p(Y427;349;350)-SHC1:GRB2:p(Y)-GAB2	1437;1438;1439;2885;3717;6464;9846	144;434;897;217;1132;584;676	0	4	5	43	1	35	0	7	584	4084	89	7
NA	39705	DCC bound to UNC-5:Netrin-1	137970;1630;9423	953;1447;604	0	0	1	3	1	4	0	0	953	3004	7	3
NA	55426	IL7:IL7RA:JAK1	3574;3575;3716	177;459;1154	0	0	3	7	1	7	0	5	459	1790	19	3
NA	117878	DAB1/CRLK/C3G	1399;1600;2889	303;555;1095	0	0	5	15	8	19	0	1	555	1953	35	3
NA	6731	CDT1:CDC6:ORC:origin complex	23594;23595;4998;4999;5000;5001;81620;84515;990	252;712;861;577;436;435;546;840;560	0	4	0	5	3	56	2	31	560	5219	96	9
NA	530724	Cell division cycle complex (CDC27; CDC16; ANAPC7)	51434;8881;996	599;620;830	0	1	1	2	8	50	9	27	620	2049	80	3
NA	524451	ITGA5-ITGB1-FN-1-NOV complex	2335;3678;3688;4856	2477;1049;801;357	0	0	1	6	3	11	1.5	10	925	4684	27	4
NA	171373	TFIIIC	2975;9328;9329;9330	2109;526;822;886	0	0	2	8	1.5	23	7.5	37	854	4343	68	4
NA	122785	Ephrin B1/EPHB1-2/NCK2	1947;2048;8440	346;987;380	0	0	7	25	3	19	0	2	380	1713	46	3
NA	133416	alpha4/beta7 Integrin/Fibronectin	2335;3676;3695	2477;1032;798	0	0	2	6	3	11	2	11	1032	4307	28	3
NA	1577	Cyclin E/A:Cdk2:phospho-p27/p21	1017;1026;890	298;164;432	4	9	1	6	6	18	6	20	298	894	53	3
NA	524201	ITGA1-ITGB1-COL6A3 complex	1293;3672;3688	3177;1179;801	0	0	1	5	0	4	0	7	1179	5157	16	3
NA	127042	Axin1/GSK3beta/PIN1/PP2A-B56alpha	2932;5300;5515;5525;8312	433;163;309;486;862	0	2	2	10	5	40	1	14	433	2253	66	5
NA	198941	(EGF:EGFR_p):(Grb2:Sos)	1950;1956;2885;6654;6655	1207;1210;217;1333;1332	0	7	3	27	1	47	0	23	1210	5299	104	5
NA	51068	HIV-1 elongation complex containing Tat	1022;1025;11198;2068;2071;25920;2962;2963;2965;2966;2967;2968;4331;51497;5430;5431;5432;5433;5434;5435;5436;5437;5438;5439;5440;5441;6749;6827;6829;6917;6921;6923;6924;7469;7936;8178;902;904;9150	346;372;1047;760;782;580;517;249;548;395;308;462;309;590;1970;1174;275;142;210;127;172;150;125;117;58;67;709;117;1087;301;112;161;798;539;380;621;323;726;961	0	33	0	52	2	243	3	199	372	18687	527	39
NA	120119	uPAR/alphaM/beta2 Integrin/Fibrinogen	2243;2244;2266;3684;3689;5329	866;491;453;1152;769;335	0	2	0	2	1.5	18	0	1	630	4066	23	6
NA	23183	C4b:C2a:C3b	717;718;720;721	752;1663;1744;1744	0	0	0	1	1	8	0	1	1703.5	5903	10	4
NA	251780	STAT1 and IRF9 complex with the ISG15 promoter	10379;6772;9636	393;750;165	0	2	0	3	0	1	1	10	393	1308	16	3
NA	794179	DNA-PKcs-PIDDosome	55367;5591;835	910;4128;452	0	16	0	3	3	33	3	113	910	5490	165	3
NA	794592	HDAC1	1108;23028;23186;3065;53615;5928;5931;60;8932;9112	1912;876;482;482;291;425;425;375;411;715	2	33	0.5	19	7	106	5.5	57	453.5	6394	215	10
NA	120895	alpha2/beta1 Integrin/Laminin 5	3673;3688;3909;3914;3918	1181;801;3333;1172;1193	0	0	2	9	3	14	2	16	1181	7680	39	5
NA	64619	Nrp-1:PlexinA:Fyn:pCdk5	1020;2534;5361;8829;8851	292;537;1896;923;307	0	1	2	18	2	20	2	8	537	3955	47	5
NA	121925	RB1/E2F1-3/DP/SPI1	1871;5925;6688;7027	465;928;271;410	2	11	0.5	7	2	34	1	4	437.5	2074	56	4
NA	526672	XFIM complex	23028;2969;3065;3066;9203	876;998;482;582;1370	2	13	1	14	11	68	8	39	876	4308	134	5
NA	115872	TIMELESS/CHEK1/ATR	1111;545;8914	476;2644;1208	0	1	2	6	8	27	6	17	1208	4328	51	3
NA	204611	TGFbeta	7040;7042;7043	390;442;412	0	0	1	2	0	0	0	2	412	1244	4	3
NA	123689	TRAIL/TRAILR2/FADD/TRADD/RIP	8717;8737;8743;8772;8795	312;671;281;208;440	0	0	0	3	3	12	1	8	312	1912	23	5
NA	127176	TGFB3/TGFBR2/Endoglin/TGFBR1/ALK1	2022;7043;7046;7048;94	658;412;503;592;503	0	0	0	5	7	29	0	2	503	2668	36	5
NA	524356	FCP1-associated protein complex	10419;11329;2079;2962;5431;79084;9150	637;465;104;517;1174;342;961	1	6	1	11	4	58	3	52	517	4200	127	7
NA	114988	proBDNF (dimer)/p75(NTR)/Sortilin	4804;627;6272	427;329;831	0	0	1	2	1	5	0	0	427	1587	7	3
NA	205694	Brg1:beta-catenin:TCF	1499;51176;6597;6932;6934;83439	781;399;1679;384;596;588	2	11	0	12	5	59	1.5	25	592	4427	107	6
NA	529678	Membrane protein complex (VCP; UFD1L; SEC61B)	10952;7353;7415	96;307;806	0	20	2	11	10	62	7	36	307	1209	129	3
NA	10085	Paused processive elongation complex	1025;11198;25920;2962;2963;51497;5430;5431;5432;5433;5434;5435;5436;5437;5438;5439;5440;5441;6749;6827;6829;6917;6921;6923;6924;7469;7936;8178;904;905;9150	372;1047;580;517;249;590;1970;1174;275;142;210;127;172;150;125;117;58;67;709;117;1087;301;112;161;798;539;380;621;726;730;961	0	33	1	48	2	236	2	168	372	15184	485	31
NA	118791	VHL/Elongin B/Elongin C/HIF2A	2034;6921;6923;7428	870;112;161;213	0.5	4	1	3	1	7	2	10	187	1356	24	4
NA	522227	Profilin 2 complex	10787;1759;23191;3312;5217;60;6853;6854;9475	1134;864;1253;646;140;375;705;582;1388	0	20	2	33	11	89	4	80	705	7087	222	9
NA	119878	CD40/CD40L (trimer)/TRAF2 (trimer)/TRAF1	7185;7186;958;959	416;501;277;261	0	0	0	0	2.5	11	1.5	11	346.5	1455	22	4
NA	533950	CALM1-FKBP38-BCL2 complex	23770;596;805	413;239;149	1	5	2	5	5	11	4	8	239	801	29	3
NA	41345	NGF:p75NTR:PRDM4	11108;4803;4804	801;241;427	0	0	0	1	1	5	0	1	427	1469	7	3
NA	128328	FGFR/FGF/Syndecan-2/FRS2/Sprouty2	10253;10818;6383	315;508;201	0	0	5	14	15	37	0	0	315	1024	51	3
NA	126570	p130CAS/Crk/Dock1	1398;1793;9564	304;1865;870	0	3	6	27	6	18	0	1	870	3039	49	3
NA	56680	Rabenosyn-5:VPS-45	11311;5868;64145	570;215;784	0	1	1	2	4	11	0	8	570	1569	22	3
NA	127132	IL5/IL5RA/CSF2RB (hexamer)/JAK2/JAK2/SHP2	1439;3567;3568;3717;5781	897;134;420;1132;593	0	2	8	33	1	10	0	1	593	3176	46	5
NA	528100	SMN complex (GEMIN5;4;3); SMN-independent intermediate	11218;25929;50628	824;1508;1058	0	1	1	2	14	35	3	9	1058	3390	47	3
NA	799600	COMMD1 ubiquitin ligase.complex	150684;6921;6923;8453;8651	190;112;161;745;211	0	2	0	3	0	1	2	8	190	1419	14	5
NA	126812	sTNF-alpha/TNFR1A/MADD	7124;7132;8567	233;455;1647	0	0	0	2	3	20	0	1	455	2335	23	3
NA	794000	FANCA	2175;2176;2178;2187;2188;2189;55120;57697;6117;641;7156;7415;80010;80233	1455;558;536;859;374;622;380;2048;616;1417;1001;806;625;730	0	27	0	14	3	118	1	68	677.5	12027	227	14
NA	528326	Ecsit complex (ECSIT; NDUFS3; NDUFAF1)	4722;51103;51295	264;327;431	0	0	0	0	0	0	0	4	327	1022	4	3
NA	171846	APRIL/TACI/TRAF6/TRAF5/TRAF2	23495;407977;7186;7188;7189;8741;8742	293;330;501;557;522;250;249	0	0	0	3	0	8	0	10	330	2702	21	7
NA	116410	GPC1/FGF2 dimer/FGFR1 dimer	2247;2260;2817	288;822;558	2	7	0	13	3	9	0	0	558	1668	29	3
NA	123600	RB1/E2F1-3/DP/SUV39H1	1869;5925;6839;7027	437;928;412;410	2	11	0	6	4.5	39	2	6	424.5	2187	62	4
NA	23752	dsRNA:RIG-I/MDA5:IPS-1:TRAF2/TRAF6:TANK:TBK1/IKKi	10010;23586;57506;7186;7706;9641	425;925;540;501;630;716	0	5	0	5	5.5	58	7	45	585	3737	113	6
NA	39438	SIAH1 bound to DCC:Netrin-1	1630;6477;9423	1447;313;604	0	0	2	5	3	6	0	0	604	2364	11	3
NA	41019	G-beta:G-gamma (candidates)	10681;2790;548645;552891	395;68;360;153	0	0	0	0	0	0	0	0	256.5	976	0	4
NA	116062	alphaM/beta2 Integrin/THY1	3684;3689;7070	1152;769;161	0	0	0	0	3	8	0	1	769	2082	9	3
NA	2495	Basigin:Mannose-carrying cell recognition molecules	481;482;483;682	303;290;279;385	0	0	0	1	0	3	3.5	16	296.5	1257	20	4
NA	36690	EGF:p-EGFR:p-ERBB2:GRB2:SOS1	1950;1956;2064;2885;6654	1207;1210;1255;217;1333	0	7	5	36	12	59	6	30	1210	5222	132	5
NA	127592	E-cadherin/beta catenin/IQGAP1	1499;8826;999	781;1657;882	0	3	10	27	13	44	13	36	882	3320	110	3
NA	795626	CNOT8-CNOT6	23019;25904;4848;4849;55571;57472;85456;9125;9337	2376;744;540;753;510;557;1729;299;292	0	1	0	15	2	121	1	25	557	7800	162	9
NA	119849	sTNF-alpha/TNFR1A/TRADD/TRAF2	7124;7132;7186;8717	233;455;501;312	0	0	0	2	2.5	11	0.5	9	383.5	1501	22	4
NA	259025	PSEN1 forms a complex with CDH1 and CTNNB1	1499;5663;999	781;467;882	0	3	4	14	13	47	2	17	781	2130	81	3
NA	7312	Processive complex	10714;23649;5111;5422;5424;5425;5557;5558;57804	466;598;261;1462;1107;469;420;509;107	1	10	1	10	2	41	6	52	469	5399	113	9
NA	15533	CRB3:PALS1:PATJ complex	10207;64398;92359	1801;675;123	0	0	4	9	3	9	0	0	675	2599	18	3
NA	531646	IKK-alpha--ER-alpha-AIB1 complex	1147;2099;8202	745;595;1424	4	12	1	4	20	52	1	2	745	2764	70	3
NA	66432	dsRNA:RIG-I/MDA5:K48 Ub-IPS-1	23586;57506;7706	925;540;630	2	5	0	4	6	31	9	30	630	2095	70	3
NA	522626	TIAM1-EFNB1-EPHA2 complex	1947;1969;7074	346;976;1591	0	0	7	20	9	37	2	14	976	2913	71	3
NA	127436	Insulin Receptor/Insulin/IRS1/NCK2	3630;3643;3667;723961;8440	110;1382;1242;200;380	0	3	4	27	3	71	0	3	380	3314	104	5
NA	526019	Ubiquitin E3 ligase (ASB6; TCEB1; TCEB2; CUL5; RNF7)	140459;6921;6923;8065;9616	421;112;161;780;113	0	1	0	2	0	5	2	7	161	1587	15	5
NA	169274	IL-1R/MYD88/IRAK/TRAF6	3554;3654;4615;7189	569;712;309;522	0	0	1	4	0.5	11	1.5	8	545.5	2112	23	4
NA	246960	TRADD complex with SQSTM1 and RIPK1	8717;8737;8878	312;671;440	0	0	2	5	4	41	6	17	440	1423	63	3
NA	529672	SEMA6D-PlexinA1-NRP1 complex	5361;80031;8829	1896;1073;923	0	0	2	6	2	5	2	6	1073	3892	17	3
NA	244035	SKP1A (SKP1) forms a complex with SKP2 and SUGT1	10910;6500;6502	365;163;424	0	1	0	4	7	16	5	12	365	952	33	3
NA	117534	Tie2/Ang1/ABIN2	284;7010;79155	498;1124;429	0	1	0	6	1	2	0	0	498	2051	9	3
NA	526389	Exon junction complex	10189;10250;10921;4116;65109;7919;9775;9939	264;904;305;146;483;428;411;174	1	12	2	18	5	162	3.5	32	358	3115	224	8
NA	527193	P-TEFb-BRD4-TRAP220 complex	1025;23476;5469;904	372;1362;1581;726	3.5	17	1.5	6	10.5	78	0.5	11	1044	4041	112	4
NA	529414	BKCA-beta2AR-AKAP79 signaling complex	154;3778;9495	413;1182;427	0	0	1	7	11	29	0	0	427	2022	36	3
NA	171040	TLR2/TLR6 activating compounds/TLR2/TLR2/MYD88/IRAK/CD14	3654;4615;7097;929	712;309;784;375	0	0	0	1	0	10	0.5	6	543.5	2180	17	4
NA	529833	pRb2/p130-multimolecular complex (DNMT1; E2F4; SuV39H1; HDAC1; RBL2)	1786;1874;3065;5934;6839	1632;413;482;1139;412	0	16	1	5	6	63	2	25	482	4078	109	5
NA	534143	STAGA core complex (SPT3-TAF9-GCN5 acetyltransferase complex)	2648;6880;8464	837;264;317	0	2	1	2	1	12	1	2	317	1418	18	3
NA	528582	DA complex	2957;2958;6872;6873;6874;6877;6878;6879;6880;6881;6882;6883;6884;6908;83860	376;109;1893;1199;1085;800;677;349;264;218;211;161;124;339;929	0	8	0	7	3	79	0	8	349	8734	102	15
NA	17309	E1 bound ubiquitin	6233;7311;7314;7316;9039	156;128;229;685;463	3	16	1	4	4	16	8	45	229	1661	81	5
NA	55460	IL7:p(Y449)-IL7RA:JAK1:IL2RG:JAK3:PI3K-regulatory subunits	3561;3574;3575;3640;3716;3718;5296	369;177;459;131;1154;1124;728	0	0	4	25	2	17	0	10	459	4142	52	7
NA	525501	mRNA decay complex (UPF1; UPF2; UPF3B; DCP2; XRN1; XRN2; EXOSC2; EXOSC4; EXOSC10; PARN)	167227;22803;23404;26019;5073;5394;54464;54512;5976;65109	420;950;293;1272;639;885;1706;245;1118;483	0	9	1.5	24	5.5	59	1	28	762	8011	120	10
NA	49382	Integrin alpha7beta1:Laminin-2	3679;3688;3908;3912;3915	1141;801;3122;1786;1609	0	1	1	7	4	13	3	17	1609	8459	38	5
NA	204771	LPS:TLR4:CD14:MD-2 complex	23643;3929;7099;929	160;481;839;375	0	0	0	2	0	3	0	0	428	1855	5	4
NA	533278	GPR56-CD81-Galphaq/11-Gbeta complex	2767;2776;2782;2783;2784;59345;9289;975	359;359;340;340;340;340;693;236	0	2	0	2	1	10	3	21	340	3007	35	8
NA	129653	TCR/CD3/MHC II/CD4/LCK/CBL/Ubiquitin	3122;3123;3932;867;915;916;917;919;920	254;266;509;906;171;207;182;164;458	0	2	2	27	2	30	0	5	254	3117	64	9
NA	522790	Polyadenylation complex (CSTF1; CSTF2; CSTF3; SYMPK CPSF1; CPSF2; CPSF3)	1477;1478;1479;29894;51692;53981;8189	431;577;717;1443;684;782;1274	0	1	1	10	5	50	5	40	717	5908	101	7
NA	9793	Capped Intronless Histone pre-mRNA:CBC:ZFP100 Complex	134353;22916;25888;4686;6628;6634;6635;6636;6637;84967	360;156;871;790;240;126;92;86;76;123	0	7	0	2	0.5	17	1.5	18	141	2920	44	10
NA	530436	Ubiquitin E3 ligase (GLMN; FBXW8; SKP1A; RBX1)	11146;26259;6500;9978	594;598;163;108	0	1	0	0	1.5	5	2.5	11	378.5	1463	17	4
NA	523365	APH1A-PSEN1-NCSTN complex	23385;51107;5663	709;265;467	0	0	0	0	0	12	2	4	467	1441	16	3
NA	41436	NGF ligand:p75NTR:Phospho-IRAK1:TRAF6:p62:aPKCi	3654;4803;4804;5584;7189;8878	712;241;427;596;522;440	0	0	1.5	11	7	73	1.5	18	481	2938	102	6
NA	192879	GRB2;LAT;DOK2	27040;2885;9046	269;217;412	0	4	6	18	1	14	1	7	269	898	43	3
NA	168049	Class I MHC/CD94/NKG2	3105;3821;3822;3823;3824;567;8302	365;233;231;257;179;119;158	0	0	0	3	0	7	0	8	231	1542	18	7
NA	522601	G protein complex (CACNA1A; GNB1; GNG2)	2782;54331;773	340;71;2512	0	0	0	4	1	7	2	6	340	2923	17	3
NA	529879	pRb2/p130-multimolecular complex (RB2; E2F4; HDAC1; SUV39H1; P300)	1874;2033;3065;5934;6839	413;2414;482;1139;412	0	81	1	10	6	68	1	13	482	4860	172	5
NA	21407	Activated RAF1 complex:MEK2	3265;4893;5605;5894;7529	189;189;400;648;246	0	4	1	7	6	56	2	18	246	1672	85	5
NA	54206	IL5 homodimer:IL5RA:Common beta chain:JAK2	1439;3567;3568;3717	897;134;420;1132	0	0	4.5	24	0.5	3	0	0	658.5	2583	27	4
NA	1512	CAK	1022;4331;902	346;309;323	0	0	0	1	6	17	0	4	323	978	22	3
NA	2382	Integrin alphaVbeta3:PECAM-1	3685;3690;5175	1048;788;738	0	0	2	9	4	12	0	7	788	2574	28	3
NA	533976	Mi-2/NuRD-MTA2 complex	3065;53615;57504;604;9219	482;291;515;706;668	2	15	1	6	6	30	1	18	515	2662	69	5
NA	256300	KIR2DL1 forms a complex with PTPN6 and PTPN11	3802;3806;5777;5781	348;304;624;593	0.5	3	5.5	21	0.5	8	0.5	4	470.5	1869	36	4
NA	200602	C3G:Rap1	2889;5906;5908	1095;184;184	0	0	1	6	2	13	1	3	184	1463	22	3
NA	59915	Cargo:AP-1:Beta-arrestin:Vamp:Clathrin Triskelion:Dynamin:Endophilin Complex	1211;1213;162;164;1785;3482;408;54885;6456;8673;8905;8907	248;1675;949;825;870;2491;418;1120;352;100;157;435	0	13	2.5	32	2.5	41	3	60	630	9640	146	12
NA	528848	SNARE complex (SNAP25; VAMP3; VAMP2; NAPB; STX13)	23673;63908;6616;6844;9341	276;298;206;116;100	0	1	0	1	3	12	4	13	206	996	27	5
NA	529522	hPRC1L complex	1912;6015;6045;648	858;406;336;326	0	1	0	0	6	28	2.5	10	371	1926	39	4
NA	257807	C12orf44 (ATG101) forms a complex with KIAA0652 (ATG13); ULK1 and RB1CC1 (FIP200)	60673;8408;9776;9821	218;1050;517;1594	0	3	0	1	8	39	0	1	783.5	3379	44	4
NA	196848	BMPR:XIAP:TAB1:TAK1	10454;331;657;658;659;6885	504;497;532;502;1038;606	0	0	0	4	5	35	1	13	518	3679	52	6
NA	126231	HMGB1/TLR4/MD2 (dimer)/MYD88/TIRAP	114609;23643;3146;4615;7099	235;160;215;309;839	0	10	2	9	0	8	0	14	235	1758	41	5
NA	205404	(VEGF:KDR_p):PI3-kinase	2277;3791;5290;5291;5293;5295;7422;7423;7424	354;1356;1068;1070;1044;724;412;207;419	0	5	1	33	1	16	0	9	724	6654	63	9
NA	31094	ARC coactivator complex	10001;10025;1024;112950;29079;51586;5469;81857;84246;892;9282;9439;9440;9441;9443;9862;9968;9969	246;877;464;301;270;788;1581;747;135;283;1454;1368;651;600;233;989;2177;2174	0	11	0	9	2	128	2.5	69	699	15338	217	18
NA	22005	TSH receptor:TSH	1081;7252;7253	116;138;764	0	0	0	0	0	1	0	0	138	1018	1	3
NA	796693	PP1.complex	5499;5500;5501;5502;5504;5506;5507;5509;5510;5511;84152;84687	341;327;323;171;205;1122;317;299;360;351;204;817	0	3	0.5	12	4.5	69	0	35	325	4837	119	12
NA	532079	VPS35-VPS29-VPS26A complex	51699;55737;9559	186;796;327	1	3	1	3	3	7	3	9	327	1309	22	3
NA	526722	CEBPE-E2F1-RB1 complex	1053;1869;5925	281;437;928	3	10	1	7	7	38	0	2	437	1646	57	3
NA	533889	RNF20-RNF40-UbE2E1 complex	56254;7324;9810	975;193;1001	1	2	1	2	5	21	3	8	975	2169	33	3
NA	123970	SMAD2-3/SMAD4/FOXO1-3a-4	2309;4087;4089	673;467;552	4	9	0	1	14	49	0	3	552	1692	62	3
NA	36477	Netrin:DCC:PITP	1630;5306;9423	1447;270;604	0	1	2	6	2	5	0	7	604	2321	19	3
NA	15125	dsRNA:RIG-I/MDA5:TRAF2/TRAF6:IPS-1:RIP-1/FADD:Casp-8/10 prodomain	23586;57506;7706;843;8737;8772	925;540;630;522;671;208	0	5	0.5	7	3.5	39	4.5	36	585	3496	87	6
NA	811200	IRAK4:MyD88:activated TLR4 receptor.complex	23643;4615;51135;7099	160;309;460;839	0	2	1	4	1.5	14	0	1	384.5	1768	21	4
NA	131236	SMAD4/Ubc9/PIASy	4089;51588;7329	552;510;158	2	8	0	1	1	6	3	8	510	1220	23	3
NA	126687	E2F1/DP/PCAF	1869;7027;8850	437;410;832	3	12	0	1	2	10	0	2	437	1679	25	3
NA	168654	Transducin	2779;2782;2793	350;340;69	0	1	0	1	0	0	2	6	340	759	8	3
NA	527523	TRF2-Rap1 complex II	25913;26277;54386;7014	634;451;399;500	0	4	0	1	4	15	2	9	475.5	1984	29	4
NA	526879	CIN85-SH3GL3-CBL complex	30011;6457;867	665;347;906	0	1	0	10	11	30	0	0	665	1918	41	3
NA	119428	VEGFR3/Type I Collagen/alpha1/beta1 Integrin	1277;1278;2324;3672;3688	1464;1366;1363;1179;801	0	1	0	15	1	7	0	7	1363	6173	30	5
NA	126111	RPA/ATR/ATRIP/RAD17/RFC2-5/9-1-1/TopBP1/CEP164	11073;22897;3364;545;5810;5883;5884;5982;5983;5984;5985;6117;6118;84126	1522;1460;280;2644;282;391;681;354;356;363;340;616;270;791	0	10	0	11	4	78	3	57	377	10350	156	14
NA	170738	coat protein/ARF1/ER cargo receptor (cy)	10945;1211;1212;1314;375	212;248;229;1233;181	0	1	3	11	2	14	1	33	229	2103	59	5
NA	63352	p-IFNAR1:p-TYK2:SOCS-1/SOCS-3	3454;7297;9021	557;1187;225	0	0	3	12	2	7	1	2	557	1969	21	3
NA	117670	RB1/E2F1-3/DP	1870;5925;7027	437;928;410	3	11	1	7	2	33	2	4	437	1775	55	3
NA	534128	STAGA complex (SPT3-TAF9-GCN5 acetyltransferase complex)	10474;10629;117143;23450;2648;27097;6880;6881;6883;8295;8464;9913	432;622;335;1217;837;589;264;218;161;3830;317;414	0	8	0	4	1	34	0.5	30	423	9236	76	12
NA	129499	IL1 alpha/IL1R1/IL1RAP	3552;3554;3556	271;569;570	0	0	1	4	2	10	0	0	569	1410	14	3
NA	118734	VEGFR1/2 (dimer)/VEGFA/PLGF1	2321;3791;5228;7422	1338;1356;170;412	0	4	3.5	18	1	6	0	0	875	3276	28	4
NA	117652	LAT/GRAP2/SLP76/VAV1/ITK	27040;3702;3937;7409;9402	269;620;533;845;330	1	5	7	32	1	19	0	8	533	2597	64	5
NA	531761	Respiratory chain complex I (intermediate V/380kD and VI/480kD); mitochondrial	4535;4695;4704;4720;4722	318;99;377;463;264	0	0	0	1	0	1	1	8	318	1521	10	5
NA	522305	RalBP1-CCNB1-AP2A-NUMB-EPN1 complex	10928;160;161;29924;8650;891	655;977;939;662;651;433	0.5	3	1	6	11.5	70	3.5	26	658.5	4317	105	6
NA	531099	DNA repair complex NEIL2-PNK-Pol(beta)-LigIII(alpha)-XRCC1	252969;3980;5423;7515;8566	332;1009;335;633;312	1	7	1	5	7	59	2	12	335	2621	83	5
NA	122263	NGF (dimer)/TRKA/MATK	4145;4803;4914	508;241;796	0	0	0	7	1	4	0	1	508	1545	12	3
NA	243087	NFKB1; NFKB2; RELA and REL complex with the TAP1 promoter	4790;4791;5966;5970;6890	969;900;619;551;808	0	10	2	8	10	46	3	12	808	3847	76	5
NA	20977	hp-IRAK1 or p-IRAK2 bound to the pIRAK4:MyD88:activated TLR7/8 or 9 complex	11344;3654;4615;51135;54106	349;712;309;460;1032	0	4	1	3	2	23	0	6	460	2862	36	5
NA	524085	BARD1-BRCA1-CSTF complex	1477;1478;1479;580;672	431;577;717;777;1884	0	2	1	4	11	78	2	12	717	4386	96	5
NA	116864	TNF-alpha/TNFR1A/TRADD/MADD/cIAP2/RIP/TRAF2/RAIDD	330;7124;7132;7186;8567;8717;8737;8738	604;233;455;501;1647;312;671;199	0	0	0	4	2.5	33	0.5	16	478	4622	53	8
NA	124621	Cyclin D3/CDK11 p58	728642;896;984	780;292;782	0	1	4	9	16	43	6	13	780	1854	66	3
NA	54592	Interleukin receptor complexes with activated SHC1:SHIP1	3558;3559;3560;3561;3640;3716;3718;5777;6464	153;272;551;369;131;1154;1124;624;584	0	1	4	32	2	23	1	14	551	4962	70	9
NA	522062	CoREST-HDAC complex	10362;23028;23186;3065;3066;51317;7764	317;876;482;482;582;680;1048	0	12	1	6	5	44	2	27	582	4467	89	7
NA	529779	RasGAP-AURKA/AURKB-survivin complex	332;5921;6790;9212	165;1047;403;344	0	0	3	10	8	37	0.5	11	373.5	1959	58	4
NA	171527	ORC/CDC6/CDT1/Cyclin E/CDK2/p27	1017;1027;23594;23595;4998;4999;5000;5001;81620;898;990	298;198;252;712;861;577;436;435;546;410;560	0	5	0	12	7	80	3	46	436	5285	143	11
NA	29207	Tropocollagen type VI	1291;1292;131873	1028;1019;2263	0	1	0	2	0	3	1	6	1028	4310	12	3
NA	523145	PPP2R1A-PPP2R1B-PPP2CA-PPME1-EIF4A1 complex	1973;51400;5515;5518;5519	406;386;309;589;667	2	11	0	4	1	10	15	62	406	2357	87	5
NA	814091	PARK2-FBXW7-CUL1.complex	5071;55294;8454	465;707;776	0	0	0	1	4	10	0	8	707	1948	19	3
NA	206184	eIF4F	1973;1974;1977;1981;8672	406;407;248;1599;1585	2	12	1	5	4	45	4	30	407	4245	92	5
NA	132990	TCF4/beta catenin/TBLR1/TBL1	1499;6907;6934;79718	781;577;596;514	1.5	6	0.5	11	5	37	3	19	586.5	2468	73	4
NA	121333	SKI/SIN3/HDAC complex/NCoR1	10284;23309;25942;3065;3066;5928;5931;6497;8819;9611	172;1162;1273;482;582;425;425;728;220;2440	2	26	1	13	5	94	3	35	532	7909	168	10
NA	133229	GMCSF/GMR alpha/CSF2RB (dimer)/IKK beta	1437;1438;1439;3551	144;434;897;756	0	1	1.5	11	1	20	0	1	595	2231	33	4
NA	168427	G12/G13-alpha/G-beta/G-gamma	10672;2782;2792	377;340;74	0	0	1	2	1	4	3	7	340	791	13	3
NA	121888	RARs/THRs/DNA/SMRT	5915;7067;9612	448;490;2524	0	8	0	5	1	81	0	1	490	3462	95	3
NA	168371	TAFs/TF2A/TBP/TF2F/TF2B/TF2H/TF2E/RNA POL II	2908;2957;2959;2960;2962;2971;5430	778;376;316;439;517;365;1970	1	12	0	18	9	108	0	43	439	4761	181	7
NA	532714	SNARE complex (STX4; SNAP23; VAMP1)	6810;6843;8773	297;118;211	0	0	1	3	5	16	3	11	211	626	30	3
NA	116354	CEBPA/BRM/RB1/E2F4	1050;1874;5925;6595	358;413;928;1590	4	18	1.5	9	14	60	2	10	670.5	3289	97	4
[truncated: 2,463 more rows]
