# Supplementary material for: Dual Coordination of Post Translational Modifications in Human Protein Networks
Source: PLoS Comput Biol. 2013 Mar 7;9(3):e1002933. doi: 10.1371/journal.pcbi.1002933 (PMC3591266; doi:10.1371/journal.pcbi.1002933)
Supplement: Dataset S4 — Annotated PTMi spots. (XLSX) [file pcbi.1002933.s004.xlsx]

## Sheet: All_PTMi_spots
									Distinct PTMs						Modifiable residue content							Regular Expressions
Symbol	EG ID	Length	WindowCount	WindowStart	WindowEnd	WindowLength	PTMDenstiy	PTMsDiff	Ub	Ac	pS_pT	pY	AllPTMs	STKY Density	S	T	K	Y	Total PTMs	PTMi Sequence	Modidifed Seq. (Dot after AA represents modification)	(S|T)P	R.R..S	R.{1,2}(S|P)	G..SR	(S|T)..R..S	Hyperphospho-degrons	Present in Enriched Complexes
CREBBP	1387	2442	1	1581	1600	20	0.4	1	0	8	0	0	Ac	0.6	3	1	8	0	8	DSKNAKKKNNKKTNKNKSSI	DSK.NAK.K.K.NNK.K.TNK.NK.SSI	0	0	0	0	0	0	1
EP300	2033	2414	1	1541	1570	30	0.45	1	0	12	0	0	Ac	0.633333	5	2	12	0	12	TKGDSKNAKKKNNKKTSKNKSSLSRGNKKK	TK.GDSK.NAK.K.K.NNK.K.TSK.NK.SSLSRGNK.K.K.	0	0	0	0	0	0	1
AHNAK	79026	5890	2	5761	5800	40	0.35	2	0	3	11	0	Ac;pS_pT	0.425	9	3	5	0	14	ASSPKGKFSLFKSKKPRHRSNSFSDEREFSGPSTPTGTLE	AS.S.PK.GKFS.LFK.SK.KPRHRS.NS.FS.DEREFS.GPS.T.PT.GT.LE	1	1	0	0	1	0	0
ATRX	546	2492	1	1921	1940	20	0.35	2	0	5	2	0	Ac;pS_pT	0.7	3	1	9	1	7	SLSSDDYTKKKKKGKKGKKD	SLSS.DDYT.KK.KKK.GK.K.GKK.D	0	0	0	0	0	0	0
DNMT1	1786	1632	1	1121	1140	20	0.35	2	0	6	1	0	Ac;pS_pT	0.45	2	0	7	0	7	SPGNKGKGKGKGKGKPKSQA	S.PGNKGK.GK.GK.GK.GK.PK.SQA	1	0	0	0	0	0	1
HIST1H2BB	3018	126	1	11	30	20	0.4	2	0	7	1	0	Ac;pS_pT	0.55	1	1	9	0	8	PKKGSKKAITKAQKKDGKKR	PK.K.GS.K.K.AITK.AQK.K.DGKKR	0	0	0	0	0	0	1
HMGA1	3159	107	2	61	90	30	0.55	2	0	7	6	0	Ac;pS_pT	0.466667	1	5	8	0	13	PKGSKNKGAAKTRKTTTTPGRKPRGRPKKL	PK.GS.K.NK.GAAK.T.RK.T.T.T.T.PGRK.PRGRPK.KL	1	0	0	0	0	0	0
MPHOSPH8	54737	860	1	161	180	20	0.35	2	0	6	1	0	Ac;pS_pT	0.45	1	0	8	0	7	EEKSPDDLKKKKAKAGKLKD	EEK.S.PDDLK.K.K.K.AKAGK.LKD	1	0	0	0	0	0	0
NFE2L2	4780	605	1	541	560	20	0.35	2	0	5	2	0	Ac;pS_pT	0.4	2	1	5	0	7	KEKGENDKSLHLLKKQLSTL	K.EK.GENDK.SLHLLK.K.QLS.T.L	0	0	0	0	0	0	0
NPM1	4869	294	1	211	230	20	0.35	3	0	4	3	0	Ac;pS_pT	0.55	5	1	5	0	7	GKDSKPSSTPRSKGQESFKK	GK.DSK.PSS.T.PRSKGQES.FK.K.	1	0	0	0	0	0	1
PLCB1	23236	1216	1	971	990	20	0.35	2	0	2	5	0	Ac;pS_pT	0.6	6	1	5	0	7	KKDSKKKSEPSSPDHGSSTI	KK.DSKK.KS.EPS.S.PDHGS.S.TI	1	0	0	0	0	0	0
RSL1D1	26156	490	1	451	470	20	0.35	2	0	2	5	0	Ac;pS_pT	0.45	2	3	4	0	7	ARQTPKKPEAKFFTTPSKSV	ARQT.PKKPEAK.FFT.T.PS.K.S.V	1	0	0	0	0	0	1
SMARCA2	6595	1590	1	1551	1570	20	0.35	2	0	6	1	0	Ac;pS_pT	0.35	1	0	6	0	7	KGKGKKRPNRGKAKPVVSDF	K.GK.GK.K.RPNRGK.AK.PVVS.DF	0	0	0	0	0	0	1
SRRM2	23524	2752	8	1441	1470	30	0.4	2	0	1	10	0	Ac;pS_pT	0.366667	9	1	1	0	11	SGSSPGLRDGSGTPSRHSLSGSSPGMKDIP	S.GS.S.PGLRDGS.GT.PS.RHS.LS.GS.S.PGMK.DIP	1	0	0	1	0	0	1
SRSF7	6432	238	1	161	200	40	0.4	2	0	1	13	0	Ac;pS_pT	0.425	15	0	1	1	14	RRSRSISLRRSRSASLRRSRSGSIKGSRYFQSPSRSRSRS	RRS.RS.IS.LRRS.RS.AS.LRRS.RS.GS.IK.GS.RYFQS.PS.RS.RSRS	1	1	0	0	1	0	1
BCLAF1	9774	920	1	141	160	20	0.35	3	0	1	5	1	Ac;pS_pT;pY	0.65	10	0	2	1	7	SSSSRSSSPYSKSPVSKRRG	S.SSSRSSS.PY.S.K.S.PVS.KRRG	1	0	1	0	1	0	0
CHD4	1108	1912	1	101	120	20	0.35	3	0	2	4	1	Ac;pS_pT;pY	0.55	3	1	6	1	7	LRSDSEGSDYTPGKKKKKKL	LRS.DS.EGS.DY.T.PGKK.K.KKKL	1	0	0	0	0	0	1
ETV6	2120	452	1	11	30	20	0.35	3	0	1	4	2	Ac;pS_pT;pY	0.45	5	1	1	2	7	KQERISYTPPESPVPSYASS	K.QERIS.Y.T.PPES.PVPSY.AS.S	1	0	0	0	0	0	0
IBTK	25998	1353	1	981	1010	30	0.35	3	0	2	7	1	Ac;pS_pT;pY	0.466667	7	1	5	1	10	KAKKKPRKRSDSSGGYNLSDIIQSPSSTGL	K.AKK.KPRKRS.DS.S.GGY.NLS.DIIQS.PS.ST.GL	1	1	0	0	0	0	0
ACLY	47	1101	1	441	460	20	0.35	1	0	0	7	0	pS_pT	0.5	7	3	0	0	7	ASGSTSTPAPSRTASFSESR	AS.GST.ST.PAPS.RT.AS.FSES.R	1	0	0	0	0	0	0
ADAM22	53616	906	1	851	870	20	0.35	1	0	0	7	0	pS_pT	0.5	7	2	1	0	7	FRPRSNSTETLSPAKSPSSS	FRPRS.NS.T.ETLSPAKS.PS.S.S.	1	1	0	0	0	0	0
ADRM1	11047	407	1	211	230	20	0.35	1	0	0	7	0	pS_pT	0.55	6	5	0	0	7	SQSAAVTPSSTTSSTRATPA	S.QS.AAVT.PS.S.T.T.SSTRATPA	1	0	0	0	0	0	0
AHCTF1	25909	2275	1	1211	1230	20	0.35	1	0	0	7	0	pS_pT	0.35	5	2	0	0	7	ILRSTLRSTPLASPSPSPGR	ILRS.T.LRS.T.PLAS.PS.PS.PGR	1	0	0	0	0	0	1
AKAP2	11217	948	1	231	260	30	0.35	1	0	0	7	0	pS_pT	0.4	8	4	0	0	7	ALGDSLQVPVSPSSTTSSRCSSRDGEFTLT	ALGDSLQVPVS.PS.S.T.T.S.S.RCSSRDGEFTLT	1	0	0	0	1	0	0
ARAF	369	606	1	211	230	20	0.35	1	0	0	7	0	pS_pT	0.4	4	4	0	0	7	RSTSTPNVHMVSTTAPMDSN	RS.T.S.T.PNVHMVS.T.T.APMDSN	1	0	0	0	0	0	0
ARAF	369	606	2	251	270	20	0.35	1	0	0	7	0	pS_pT	0.4	6	1	1	0	7	DGTPRGSPSPASVSSGRKSP	DGT.PRGS.PS.PAS.VS.S.GRKS.P	1	0	1	0	0	0	0
ARHGEF2	9181	986	1	171	190	20	0.35	1	0	0	7	0	pS_pT	0.35	5	2	0	0	7	LSQSTDSLNMRNRTLSVESL	LS.QS.T.DS.LNMRNRT.LS.VES.L	0	1	0	0	0	0	1
ARHGEF2	9181	986	2	941	960	20	0.35	1	0	0	7	0	pS_pT	0.35	6	1	0	0	7	SDPDTGSEEEGSSRLSPPHS	S.DPDT.GS.EEEGS.S.RLS.PPHS.	1	0	1	0	0	0	1
ATP2B1	490	1220	1	1201	1220	20	0.35	1	0	0	7	0	pS_pT	0.5	7	2	1	0	7	NKSATSSSPGSPLHSLETSL	NKSATS.S.S.PGS.PLHS.LET.S.L	1	0	0	0	0	0	0
ATP2B2	491	1243	1	1224	1243	20	0.35	1	0	0	7	0	pS_pT	0.55	8	2	1	0	7	SKSATSSSPGSPIHSLETSL	SKSATS.S.S.PGS.PIHS.LET.S.L	1	0	0	0	0	0	0
BAG3	9531	575	1	271	290	20	0.35	1	0	0	7	0	pS_pT	0.35	6	1	0	0	7	QGASSREGSPARSSTPLHSP	QGAS.S.REGS.PARS.S.T.PLHS.P	1	0	1	1	0	0	0
BAP1	8314	729	1	581	600	20	0.35	1	0	0	7	0	pS_pT	0.35	7	0	0	0	7	GSSPSIRPIQGSQGSSSPVE	GS.S.PS.IRPIQGS.QGS.S.S.PVE	1	0	0	0	0	0	0
BCL9L	283149	1499	1	931	950	20	0.35	1	0	0	7	0	pS_pT	0.4	5	2	1	0	7	HLKSPTLSQVHSPLVTSPSA	HLKS.PT.LS.QVHS.PLVT.S.PS.A	1	0	0	0	0	0	0
BCL9L	283149	1499	2	981	1000	20	0.4	1	0	0	8	0	pS_pT	0.5	8	1	1	0	8	SSLSVRSPTGSPSRLKSPSM	S.S.LS.VRS.PTGS.PS.RLKS.PS.M	1	0	1	1	1	0	0
BIN2	51411	565	1	431	460	30	0.35	1	0	0	11	0	pS_pT	0.366667	7	4	0	0	11	GNIPSSPTASGGGSPTSPRASLGTGTASPR	GNIPS.S.PT.AS.GGGS.PT.S.PRAS.LGT.GT.AS.PR	1	0	0	0	0	0	0
C2orf49	79074	232	1	141	160	20	0.35	1	0	0	7	0	pS_pT	0.45	8	0	1	0	7	KLSNSSSSVSPLILSSNLPV	KLS.NS.S.S.S.VS.PLILS.SNLPV	1	0	0	0	0	0	0
CCR7	1236	378	1	359	378	20	0.35	1	0	0	7	0	pS_pT	0.4	4	4	0	0	7	RHIRRSSMSVEAETTTTFSP	RHIRRS.S.MSVEAET.T.T.T.FS.P	1	0	0	0	0	0	0
CD2AP	23607	639	1	221	240	20	0.35	1	0	0	7	0	pS_pT	0.55	4	3	4	0	7	KEGSVKLRTRTSSSETEEKK	KEGS.VKLRT.RT.S.S.S.ET.EEKK	0	1	0	0	0	0	1
CDC23	8697	597	1	578	597	20	0.35	1	0	0	7	0	pS_pT	0.35	4	3	0	0	7	SANNTPTRRVSPLNLSSVTP	S.ANNT.PT.RRVS.PLNLS.S.VT.P	1	0	1	0	1	0	1
CDK12	51755	1490	2	331	350	20	0.35	1	0	0	7	0	pS_pT	0.45	8	0	1	0	7	RSSSPFLSKRSLSRSPLPSR	RS.S.S.PFLS.KRS.LS.RS.PLPSR	1	0	1	0	0	0	1
CDK13	8621	1512	1	431	450	20	0.35	1	0	0	7	0	pS_pT	0.55	8	2	1	0	7	SRSRHSSISPSTLTLKSSLA	S.RSRHS.S.IS.PS.T.LT.LKSSLA	1	1	0	0	1	0	0
CDK14	5218	451	1	101	120	20	0.35	2	0	0	7	0	pS_pT	0.55	6	1	3	1	7	SSPSSPTSPKFGKADSYEKL	S.S.PS.S.PT.S.PKFGKADS.YEKL	1	0	0	0	0	0	0
CHD4	1108	1912	3	1531	1550	20	0.4	1	0	0	8	0	pS_pT	0.45	4	4	1	0	8	SQPGSPSPKTPTPSTPGDTQ	S.QPGS.PS.PKT.PT.PS.T.PGDT.Q	1	0	0	0	0	0	1
CHEK2	11200	586	1	21	60	40	0.5	1	0	0	15	0	pS_pT	0.55	18	4	0	0	15	PHGSVTQSQGSSSQSQGISSSSTSTMPNSSQSSHSSSGTL	PHGS.VT.QS.QGSSS.QS.QGIS.S.S.S.T.S.T.MPNSS.QS.SHS.SSGTL	0	0	0	0	0	0	0
CHERP	10523	916	1	811	830	20	0.4	2	0	0	8	0	pS_pT	0.4	7	1	0	0	8	RRSRSRSPTPPSSAGLGSNS	RRS.RS.RS.PT.PPS.S.AGLGS.NS.	1	1	1	0	0	0	1
CHRM2	1129	466	1	271	300	30	0.35	1	0	0	8	0	pS_pT	0.3	6	2	1	0	8	TENCVQGEEKESSNDSTSVSAVASNMRDDE	T.ENCVQGEEKES.S.NDS.T.S.VS.AVAS.NMRDDE	0	0	0	0	0	0	0
CLASP1	23332	1538	1	551	570	20	0.35	1	0	0	7	0	pS_pT	0.45	8	0	1	0	7	QSDRSSSSSQESLNRPLSAK	QS.DRS.S.SS.S.QES.LNRPLS.AK	0	0	0	0	1	0	1
CLASP1	23332	1538	2	641	660	20	0.35	1	0	0	7	0	pS_pT	0.35	4	3	0	0	7	RTRRQSSGSATNVASTPDNR	RT.RRQS.S.GS.AT.NVAS.T.PDNR	1	1	0	0	0	0	1
CLIP1	6249	1427	1	181	200	20	0.35	1	0	0	7	0	pS_pT	0.45	5	3	1	0	7	ATPPISNLTKTASESISNLS	AT.PPIS.NLTKT.AS.ES.IS.NLS.	1	0	0	0	0	0	1
CSNK1D	1453	415	1	341	360	20	0.35	1	0	0	7	0	pS_pT	0.35	2	5	0	0	7	APPTPLTPTSHTANTSPRPV	APPT.PLT.PT.S.HT.ANT.S.PRPV	1	0	0	0	0	0	1
CSNK1D	1453	415	2	381	410	30	0.45	1	0	0	11	0	pS_pT	0.366667	8	3	0	0	11	ISSSDLTGRQDTSRMSTSQIPGRVASSGLQ	IS.S.S.DLT.GRQDT.S.RMS.T.S.QIPGRVAS.S.GLQ	0	0	0	0	0	0	1
DBN1	1627	651	1	331	350	20	0.45	1	0	0	9	0	pS_pT	0.45	5	4	0	0	9	APTPIPTRSPSDSSTASTPV	APT.PIPT.RS.PS.DS.S.T.AS.T.PV	1	0	0	0	0	0	0
DCX	1641	441	1	401	420	20	0.35	1	0	0	7	0	pS_pT	0.55	6	3	2	0	7	STPKSKQSPISTPTSPGSLR	ST.PKS.KQS.PIS.T.PTS.PGS.LR	1	0	0	0	0	0	0
DEPTOR	64798	409	1	281	300	20	0.35	1	0	0	7	0	pS_pT	0.6	10	1	0	1	7	MSSCGSSGYFSSSPTLSSSP	MS.S.CGSS.GYFSSS.PTLS.S.S.P	1	0	0	0	0	0	1
DLC1	10395	1528	1	741	760	20	0.35	1	0	0	7	0	pS_pT	0.65	10	3	0	0	7	SSSSSQSETSSAVSTPSPVT	S.S.SSSQS.ET.S.SAVS.T.PSPVT	1	0	0	0	0	0	0
DMD	1756	3685	1	3611	3630	20	0.4	1	0	0	8	0	pS_pT	0.4	7	1	0	0	8	VSSPSTSLQRSDSSQPMLLR	VS.S.PS.T.S.LQRS.DS.S.QPMLLR	1	0	0	0	1	0	1
DNTTIP2	30836	756	2	181	200	20	0.4	1	0	0	8	0	pS_pT	0.4	6	2	0	0	8	EAISDAETSSSDISFSGIAT	EAIS.DAET.S.S.S.DIS.FS.GIAT.	0	0	0	0	0	0	0
DOCK7	85440	2109	1	891	910	20	0.4	1	0	0	8	0	pS_pT	0.4	6	2	0	0	8	LNRSRSLSNSNPDISGTPTS	LNRS.RS.LS.NS.NPDIS.GT.PT.S.	1	1	0	0	0	0	0
DYNC1I2	1781	638	1	81	100	20	0.35	1	0	0	7	0	pS_pT	0.4	6	1	1	0	7	WVPPPMSPSSKSVSTPSEAG	WVPPPMS.PS.S.KS.VS.T.PS.EAG	1	0	0	0	0	0	1
DYNC1LI1	51143	523	1	501	523	23	0.4	1	0	0	8	0	pS_pT	0.434783	3	6	1	0	8	RITRKPVTVSPTTPTSPTEGEAS	RITRKPVT.VS.PT.T.PT.S.PT.EGEAS.	1	0	0	0	0	0	0
EDC4	23644	1401	1	721	740	20	0.35	1	0	0	7	0	pS_pT	0.4	6	2	0	0	7	QASPSRTRSPDVISSASTAL	QAS.PS.RT.RS.PDVIS.S.AST.AL	1	0	1	0	1	0	0
EIF3C	8663	913	1	1	20	20	0.4	1	0	0	8	0	pS_pT	0.45	7	2	0	0	8	MSRFFTTGSDSESESSLSGE	MSRFFT.T.GS.DS.ES.ES.S.LS.GE	0	0	0	0	0	0	1
EIF3CL	728689	914	1	1	20	20	0.35	1	0	0	7	0	pS_pT	0.45	7	2	0	0	7	MSRFFTTGSDSESESSLSGE	MSRFFT.TGS.DS.ES.ES.S.LS.GE	0	0	0	0	0	0	1
EIF4B	1975	611	1	411	430	20	0.4	1	0	0	8	0	pS_pT	0.45	5	4	0	0	8	ETQERERSRTGSESSQTGTS	ET.QERERS.RT.GS.ES.S.QT.GT.S	0	1	0	0	1	0	1
EIF4B	1975	611	2	491	510	20	0.35	1	0	0	7	0	pS_pT	0.35	5	2	0	0	7	PPARSQSSDTEQQSPTSGGG	PPARS.QS.S.DT.EQQS.PT.S.GGG	1	0	0	0	0	0	1
EPS15L1	58513	864	1	241	260	20	0.35	1	0	0	7	0	pS_pT	0.5	8	1	1	0	7	SHGSVSSLNSTGSLSPKHSL	S.HGS.VSSLNS.T.GS.LS.PKHS.L	1	0	0	0	0	0	1
EPS8	2059	822	1	651	670	20	0.35	1	0	0	7	0	pS_pT	0.35	6	1	0	0	7	PANITRQNSSSSDSGGSIVR	PANIT.RQNS.S.S.S.DS.GGS.IVR	0	0	0	0	0	0	0
FCHO2	115548	810	1	491	520	30	0.4	1	0	0	12	0	pS_pT	0.433333	11	2	0	0	12	VTSNTSPPPAAPLARAESSSSISSSASLSA	VT.S.NT.S.PPPAAPLARAES.S.S.S.IS.SS.AS.LS.A	1	0	0	0	0	0	0
FPR1	2357	350	1	321	340	20	0.4	1	0	0	8	0	pS_pT	0.45	3	6	0	0	8	ERALTEDSTQTSDTATNSTL	ERALTEDS.T.QT.S.DT.AT.NS.T.L	0	0	0	0	0	0	0
FTSJ3	117246	847	1	611	630	20	0.35	1	0	0	7	0	pS_pT	0.45	7	1	1	0	7	EKDGISDSDSSTSSEEEESW	EKDGIS.DS.DS.S.T.S.S.EEEESW	0	0	0	0	0	0	0
FTSJD2	23070	835	1	51	70	20	0.35	1	0	0	7	0	pS_pT	0.4	6	1	1	0	7	SGSDSETEGKQHSSDSFDDA	S.GS.DS.ET.EGKQHS.S.DS.FDDA	0	0	0	0	0	0	0
FXR1	8087	621	1	401	420	20	0.35	1	0	0	7	0	pS_pT	0.4	5	2	1	0	7	TNSELSNPSETESERKDELS	T.NS.ELS.NPS.ET.ES.ERKDELS.	0	0	0	0	0	0	0
FXR1	8087	621	2	481	500	20	0.35	2	0	0	7	0	pS_pT	0.4	4	4	0	0	7	DNTESDQTADTDASESHHST	DNT.ES.DQT.ADT.DAS.ES.HHST.	0	0	0	0	0	0	0
GAK	2580	1311	1	771	790	20	0.35	2	0	0	7	0	pS_pT	0.35	6	1	0	0	7	PEAEPTDSDSPPSSSADASR	PEAEPT.DS.DS.PPS.S.S.ADAS.R	1	0	0	0	0	0	0
GAPVD1	26130	1487	2	961	990	30	0.4	1	0	0	9	0	pS_pT	0.4	9	2	1	0	9	AIGATSLVAAPHSSSSSPSKDSSRGETEER	AIGATS.LVAAPHS.S.S.S.S.PS.KDS.S.RGETEER	1	0	0	0	0	0	0
GBF1	8729	1859	1	1771	1790	20	0.35	1	0	0	7	0	pS_pT	0.4	8	0	0	0	7	PESPRAASSSSPGSPVASSP	PES.PRAASS.S.S.PGS.PVAS.S.P	1	0	0	0	0	0	0
GIGYF2	26058	1320	1	391	410	20	0.35	1	0	0	7	0	pS_pT	0.45	6	3	0	0	7	TPQTSSSSARPGTPSDHQSQ	T.PQT.SSS.S.ARPGT.PS.DHQS.Q	1	0	0	0	0	0	0
GOLGA3	2802	1498	1	381	400	20	0.35	1	0	0	7	0	pS_pT	0.35	7	0	0	0	7	GEVRSRRDSICSSVSLESSA	GEVRS.RRDS.ICS.S.VS.LES.S.A	0	1	0	0	0	0	0
GTF2F1	2962	517	1	431	450	20	0.4	1	0	0	8	0	pS_pT	0.5	5	3	2	0	8	SLSGKSTPQPPSGKTTPNSG	S.LS.GKS.T.PQPPS.GKT.T.PNS.G	1	0	0	0	0	0	1
GTF2I	2969	998	1	821	840	20	0.35	1	0	0	7	0	pS_pT	0.45	5	2	2	0	7	SKSPPRKINSSPNVNTTASG	S.KS.PPRKINS.S.PNVNT.T.AS.G	1	0	0	0	0	0	1
GYS1	2997	737	1	641	660	20	0.35	2	0	0	7	0	pS_pT	0.35	7	0	0	0	7	SVPPSPSLSRHSSPHQSEDE	S.VPPS.PS.LS.RHS.S.PHQS.EDE	1	0	1	0	1	0	0
GYS1	2997	737	2	701	737	37	0.5	1	0	0	13	0	pS_pT	0.513514	13	5	1	0	13	SSTSGSKRNSVDTATSSSLSTPSEPLSPTSSLGEERN	S.STSGSKRNS.VDT.AT.S.S.S.LS.T.PSEPLS.PT.S.S.LGEERN	1	0	0	0	0	0	0
HAUS8	93323	410	1	121	140	20	0.35	1	0	0	7	0	pS_pT	0.6	5	2	5	0	7	KTISKKPESTSFSAPRKKSP	KT.IS.KKPES.T.S.FS.APRKKS.P	1	0	1	0	1	0	0
INCENP	3619	918	1	291	310	20	0.4	1	0	0	8	0	pS_pT	0.4	5	3	0	0	8	STPTGSRTDSQSVRHSPIAP	S.T.PT.GS.RT.DS.QS.VRHS.PIAP	1	0	1	0	1	0	1
INF2	64423	1249	1	1191	1210	20	0.35	1	0	0	7	0	pS_pT	0.4	5	2	1	0	7	KSFSEDAVTDSSGSGTLPRA	KS.FS.EDAVT.DS.S.GS.GT.LPRA	0	0	0	0	0	0	0
IRF7	3665	516	1	481	500	20	0.35	1	0	0	7	0	pS_pT	0.45	9	0	0	0	7	EGVSSLDSSSLSLCLSSANS	EGVS.S.LDSSS.LS.LCLS.S.ANS.	0	0	0	0	0	0	1
KANSL3	55683	878	1	521	540	20	0.35	1	0	0	7	0	pS_pT	0.55	10	1	0	0	7	PASPSGSEDLSSVSSSPTSS	PAS.PS.GSEDLSSVSS.S.PT.S.S.	1	0	0	0	0	0	0
KDM3B	51780	1761	1	721	740	20	0.4	1	0	0	8	0	pS_pT	0.4	5	3	0	0	8	GNGRSSSPTSSLTQPIEMPT	GNGRS.S.S.PT.S.S.LT.QPIEMPT.	1	0	1	0	0	0	0
LIMA1	51474	760	1	591	620	30	0.35	1	0	0	9	0	pS_pT	0.433333	7	3	3	0	9	PFTVAASFQSTSVKSPKTVSPPIRKGWSMS	PFT.VAASFQS.T.S.VKS.PKT.VS.PPIRKGWS.MS.	1	0	0	0	0	0	1
LIMCH1	22998	1083	1	201	220	20	0.35	1	0	0	7	0	pS_pT	0.35	6	1	0	0	7	SFDSLDSFGSRSRQTPSPDV	S.FDS.LDS.FGS.RS.RQT.PS.PDV	1	0	0	1	0	0	0
LIMCH1	22998	1083	2	511	530	20	0.35	1	0	0	7	0	pS_pT	0.5	6	3	1	0	7	SVLDTSMSAGSGSPSKTVTP	SVLDTS.MS.AGS.GS.PS.KT.VT.P	1	0	0	0	0	0	0
LIMK2	3985	686	1	261	280	20	0.35	1	0	0	7	0	pS_pT	0.45	7	0	2	0	7	RSLRRSNSISKSPGPSSPKE	RS.LRRS.NS.IS.KS.PGPS.S.PKE	1	0	0	0	1	0	0
LMNA	4000	664	3	611	630	20	0.35	1	0	0	7	0	pS_pT	0.55	8	2	0	1	7	ISSGSSASSVTVTRSYRSVG	IS.S.GS.S.AS.S.VTVTRSYRS.VG	0	0	0	0	0	0	1
LMNB1	4001	586	1	391	410	20	0.45	2	0	0	9	0	pS_pT	0.5	9	1	0	0	9	SPSPSSRVTVSRASSSRSVR	S.PS.PS.S.RVTVS.RAS.S.S.RS.VR	1	0	0	0	1	0	1
LRRFIP1	9208	808	1	111	130	20	0.35	1	0	0	7	0	pS_pT	0.4	5	3	0	0	7	LGGTSSRRGSGDTSISIDTE	LGGT.S.S.RRGS.GDT.S.IS.IDTE	0	0	0	1	1	0	0
LRRFIP2	9209	721	1	321	340	20	0.35	2	0	0	7	0	pS_pT	0.4	6	2	0	0	7	GNSSRRGSGDTSSLIDPDTS	GNS.S.RRGS.GDT.S.S.LIDPDT.S	0	0	0	1	0	0	0
LSR	51599	649	1	501	520	20	0.35	1	0	0	7	0	pS_pT	0.45	6	3	0	0	7	TPPSTAESGSRSPTSNGGRS	T.PPS.T.AES.GS.RS.PT.SNGGRS	1	0	0	0	0	0	0
MAP1A	4130	2803	1	891	910	20	0.35	1	0	0	7	0	pS_pT	0.45	5	2	2	0	7	SAGTISPTSSLEEDKGFKSP	S.AGT.IS.PT.S.S.LEEDKGFKS.P	1	0	0	0	0	0	0
MAP2	4133	1827	1	1581	1620	40	0.45	1	0	0	15	0	pS_pT	0.45	6	10	1	1	15	PIRRAGKSGTSTPTTPGSTAITPGTPPSYSSRTPGTPGTP	PIRRAGKS.GT.S.T.PT.T.PGS.T.AIT.PGT.PPS.YSS.RT.PGT.PGT.P	1	0	0	0	0	0	0
MAP3K2	10746	619	1	291	320	30	0.4	1	0	0	12	0	pS_pT	0.466667	10	4	0	0	12	QGTSLRSPVSFSPTDHSLSTSSGSSIFTPE	QGT.S.LRS.PVS.FS.PT.DHSLS.T.S.S.GS.S.IFTPE	1	0	0	0	0	0	0
MAP3K5	4217	1374	1	971	990	20	0.35	1	0	0	7	0	pS_pT	0.45	6	2	0	1	7	VLVEDTSSSSEYGSVSPDTE	VLVEDT.S.S.S.SEYGS.VS.PDT.E	1	0	0	0	0	0	0
MAP4K4	9448	1320	1	751	770	20	0.35	1	0	0	7	0	pS_pT	0.45	9	0	0	0	7	PRPGSGSSSGSSNSGSQPGS	PRPGS.GS.S.S.GS.S.NSGSQPGS.	0	0	0	0	0	0	1
MAP4K4	9448	1320	2	921	940	20	0.4	1	0	0	8	0	pS_pT	0.6	7	3	2	0	8	TQSASSTLQKHKSSSSFTPF	T.QS.AS.STLQKHKS.S.S.S.FT.PF	1	0	0	0	0	0	1
MAPT	4137	776	2	731	750	20	0.4	2	0	0	8	0	pS_pT	0.4	6	2	0	0	8	SPVVSGDTSPRHLSNVSSTG	S.PVVS.GDT.S.PRHLS.NVS.S.T.G	1	0	0	0	1	0	0
MARCKS	4082	332	1	131	150	20	0.45	2	0	0	9	0	pS_pT	0.5	6	3	1	0	9	SSTSSPKAEDGATPSPSNET	S.S.T.S.S.PKAEDGAT.PS.PS.NET.	1	0	0	0	0	0	0
MARK3	4140	753	1	371	390	20	0.35	1	0	0	7	0	pS_pT	0.45	8	0	1	0	7	LDASDSSSSSNLSLAKVRPS	LDAS.DS.S.S.S.S.NLS.LAKVRPS	0	0	0	0	0	0	0
MARK3	4140	753	2	531	550	20	0.35	1	0	0	7	0	pS_pT	0.35	4	3	0	0	7	IPDQRTPVASTHSISSAATP	IPDQRT.PVAS.T.HS.IS.S.AAT.P	1	0	0	0	0	0	0
MAVS	57506	540	1	241	260	20	0.45	1	0	0	9	0	pS_pT	0.5	7	3	0	0	9	PGPTGSVVSTGTSFSSSSPG	PGPT.GS.VVS.T.GT.S.FS.S.SS.PG	1	0	0	0	0	0	0
MCM2	4171	904	1	21	40	20	0.4	1	0	0	8	0	pS_pT	0.4	5	3	0	0	8	NDPLTSSPGRSSRRTDALTS	NDPLT.S.S.PGRS.S.RRT.DALT.S.	1	0	0	1	0	0	1
MET	4233	1408	1	1001	1020	20	0.35	2	0	0	7	0	pS_pT	0.35	5	2	0	0	7	LVSARSVSPTTEMVSNESVD	LVS.ARS.VS.PT.T.EMVS.NES.VD	1	0	1	0	0	0	1
MLLT1	4298	559	1	431	450	20	0.35	1	0	0	7	0	pS_pT	0.35	7	0	0	0	7	PGRDSRLSFSDSESDNSADS	PGRDS.RLS.FS.DS.ES.DNS.ADS.	0	0	0	1	0	0	1
MTOR	2475	2549	1	1841	1860	20	0.35	1	0	0	7	0	pS_pT	0.45	6	3	0	0	7	TASTEGSNSESEAESTENSP	T.AS.TEGS.NS.ES.EAEST.ENS.P	1	0	0	0	0	0	1
MYO18A	399687	2054	1	1061	1080	20	0.35	1	0	0	7	0	pS_pT	0.35	7	0	0	0	7	ASSRRVSSSSELDLPSGDHC	AS.S.RRVS.S.S.S.ELDLPS.GDHC	0	0	0	0	1	0	0
NDRG1	10397	394	1	321	360	40	0.45	1	0	0	14	0	pS_pT	0.475	11	8	0	0	14	TRLMRSRTASGSSVTSLDGTRSRSHTSEGTRSRSHTSEGT	TRLMRS.RT.AS.GS.S.VT.S.LDGTRS.RS.HT.S.EGT.RS.RS.HTSEGT	0	1	0	1	0	0	0
NDRG2	57447	371	1	321	360	40	0.5	1	0	0	17	0	pS_pT	0.45	13	5	0	0	17	CMTRLSRSRTASLTSAASVDGNRSRSRTLSQSSESGTLSS	CMTRLS.RS.RT.AS.LT.S.AAS.VDGNRS.RS.RT.LS.QS.S.ES.GT.LS.S.	0	1	0	1	1	0	0
NDRG3	57446	375	1	321	350	30	0.5	1	0	0	13	0	pS_pT	0.466667	10	4	0	0	13	MTRLARSRTHSTSSSLGSGESPFSRSVTSN	MT.RLARS.RT.HS.T.S.S.S.LGS.GES.PFSRS.VT.S.N	1	1	0	0	0	0	0
NDUFV3	4731	473	1	141	170	30	0.5	1	0	0	10	0	pS_pT	0.466667	12	1	1	0	10	ARQVGRKVTSPSSSSSSSSSDSESDDEADV	ARQVGRKVTSPS.SS.S.S.S.S.S.S.DS.ES.DDEADV	1	0	0	0	0	0	0
NFATC2	4773	925	1	161	180	20	0.35	1	0	0	7	0	pS_pT	0.4	7	0	0	1	7	YREPLCLSPASSGSSASFIS	YREPLCLS.PAS.S.GS.S.AS.FIS.	1	0	0	0	0	0	0
NFKB1	4790	969	1	921	940	20	0.35	1	0	0	7	0	pS_pT	0.4	5	2	1	0	7	DSDSVCDSGVETSFRKLSFT	DS.DS.VCDS.GVET.S.FRKLS.FT.	0	0	0	0	1	0	1
NUP153	9972	1475	2	511	530	20	0.35	1	0	0	7	0	pS_pT	0.5	6	2	2	0	7	KVQMTSPSSTGSPMFKFSSP	KVQMT.S.PS.S.T.GS.PMFKFSS.P	1	0	0	0	0	0	1
NUP214	8021	2090	1	421	450	30	0.35	1	0	0	8	0	pS_pT	0.4	6	4	2	0	8	SLEGERQPKSPGSTPTTPTSSQAPQKLDAS	SLEGERQPKS.PGS.T.PT.T.PT.S.S.QAPQKLDAS	1	0	0	0	0	0	1
NUP214	8021	2090	2	981	1000	20	0.35	1	0	0	7	0	pS_pT	0.4	7	1	0	0	7	LDEVSSTSSVSQSLESEDAR	LDEVS.S.T.S.S.VS.QS.LESEDAR	0	0	0	0	0	0	1
OSBPL11	114885	747	1	171	190	20	0.4	1	0	0	8	0	pS_pT	0.4	8	0	0	0	8	RSFSLASSSNSPISQRRPSQ	RS.FS.LAS.S.S.NS.PIS.QRRPS.Q	1	0	0	0	0	0	0
PAK1	5058	553	1	211	230	20	0.4	2	0	0	8	0	pS_pT	0.4	2	6	0	0	8	VTPTRDVATSPISPTENNTT	VT.PT.RDVAT.S.PIS.PT.ENNT.T.	1	0	0	0	0	0	1
PALM2-AKAP2	445815	1103	1	371	400	30	0.35	1	0	0	7	0	pS_pT	0.366667	8	3	0	0	7	RDALGDSLQVPVSPSSTTSSRCSSRDGEFT	RDALGDSLQVPVS.PS.S.T.T.S.S.RCSSRDGEFT	1	0	0	0	1	0	0
PBRM1	55193	1602	1	11	30	20	0.35	1	0	0	7	0	pS_pT	0.35	6	1	0	0	7	PSSSVSGDFDDGHHSVSTPG	PS.S.S.VS.GDFDDGHHS.VS.T.PG	1	0	0	0	0	0	1
PCF11	51585	1555	1	171	190	20	0.35	1	0	0	7	0	pS_pT	0.4	5	3	0	0	7	EEPSTPGTVVSSPSISTPPI	EEPST.PGT.VVS.S.PS.IS.T.PPI	1	0	0	0	0	0	1
PI4KA	5297	2044	1	191	210	20	0.4	1	0	0	8	0	pS_pT	0.5	6	2	2	0	8	GTLKRKTSSVSSISQVSPER	GT.LKRKT.S.S.VS.S.IS.QVS.PER	1	0	0	0	1	0	0
PLEC	5339	4684	3	4641	4660	20	0.35	1	0	0	7	0	pS_pT	0.55	8	2	0	1	7	GSFDATGSGFSMTFSSSSYS	GS.FDAT.GS.GFSMT.FSS.SS.YS.	0	0	0	0	0	0	1
PPHLN1	51535	458	1	191	210	20	0.35	1	0	0	7	0	pS_pT	0.5	6	2	2	0	7	KERPVQSLKTSRDTSPSSGS	KERPVQS.LKT.S.RDT.S.PS.S.GS	1	0	1	0	0	0	0
PRKAA1	5562	574	2	521	550	30	0.35	1	0	0	9	0	pS_pT	0.433333	10	2	1	0	9	SDSDAEAQGKSSEVSLTSSVTSLDSSPVDL	S.DS.DAEAQGKS.SEVS.LT.S.S.VTS.LDS.SPVDL	1	0	0	0	0	0	0
PRKAG2	51422	569	1	141	170	30	0.5	2	0	0	12	0	pS_pT	0.466667	8	5	1	0	12	ATSPGGIRFFSRSRKTSGLSSSPSTPTQVT	AT.S.PGGIRFFS.RS.RKT.S.GLS.S.S.PS.T.PT.QVT	1	1	0	0	1	0	0
PRKCE	5581	737	1	331	350	20	0.35	1	0	0	7	0	pS_pT	0.45	7	1	1	0	7	QPASGSSPSEEDRSKSAPTS	QPAS.GS.S.PS.EEDRSKS.APT.S.	1	0	0	0	0	0	0
PRKCI	5584	596	1	1	20	20	0.35	1	0	0	7	0	pS_pT	0.35	4	3	0	0	7	MPTQRDSSTMSHTVAGGGSG	MPT.QRDS.S.T.MS.HT.VAGGGS.G	0	0	0	0	0	0	1
RAB11FIP1	80223	1283	1	341	360	20	0.35	1	0	0	7	0	pS_pT	0.5	6	1	3	0	7	SSSPSPKGFRKKHLFSSTEN	S.S.S.PS.PKGFRKKHLFS.S.T.EN	1	0	0	0	0	0	0
RAF1	5894	648	1	251	270	20	0.35	1	0	0	7	0	pS_pT	0.4	4	4	0	0	7	LSQRQRSTSTPNVHMVSTTL	LS.QRQRS.T.S.T.PNVHMVST.T.L	1	1	0	0	0	0	1
RANBP2	5903	3224	1	2491	2510	20	0.35	1	0	0	7	0	pS_pT	0.5	5	4	1	0	7	ATSEVEVSSTSETTPKAVVS	ATS.EVEVS.S.T.S.ETT.PKAVVS.	1	0	0	0	0	0	1
RBL2	5934	1139	1	971	990	20	0.35	1	0	0	7	0	pS_pT	0.4	5	3	0	0	7	SSSTLPVPQPSSAPPTPTRL	S.S.S.T.LPVPQPS.S.APPT.PTRL	1	0	0	0	0	0	1
RICTOR	253260	1708	1	1211	1240	30	0.4	1	0	0	10	0	pS_pT	0.533333	10	5	1	0	10	SHMKIRSQSFNTDTTTSGISSMSSSPSRET	SHMKIRS.QS.FNT.DT.T.T.S.GIS.S.MSSS.PSRET	1	0	0	0	0	0	1
RIF1	55183	2472	1	2161	2180	20	0.35	1	0	0	7	0	pS_pT	0.4	6	2	0	0	7	SPSGMQTRCVWSPLASPSTS	S.PS.GMQT.RCVWS.PLAS.PST.S.	1	0	0	0	0	0	0
RPRD2	23248	1461	1	471	490	20	0.35	1	0	0	7	0	pS_pT	0.4	5	3	0	0	7	GVSPASRPSPGTPTSPSNLT	GVS.PAS.RPS.PGT.PT.S.PS.NLT	1	0	1	0	0	0	0
RPS6	6194	249	1	230	249	20	0.4	2	0	0	8	0	pS_pT	0.55	7	1	3	0	8	KRRRLSSLRASTSKSESSQK	KRRRLS.S.LRAS.T.S.KS.ES.S.QK	0	1	0	0	0	0	1
RPTOR	57521	1335	1	851	900	50	0.4	1	0	0	15	0	pS_pT	0.38	12	5	2	0	15	LDTSSLTQSAPASPTNKGVHIHQAGGSPPASSTSSSSLTNDVAKQPVSRD	LDT.S.S.LT.QS.APAS.PT.NKGVHIHQAGGS.PPAS.S.T.S.SS.S.LT.NDVAKQPVSRD	1	0	0	0	0	0	1
SAFB	6294	915	1	11	30	20	0.35	1	0	0	7	0	pS_pT	0.35	5	2	0	0	7	SGAAGAAALSSASSETGTRR	S.GAAGAAALS.S.AS.S.ET.GT.RR	0	0	0	0	0	0	0
SEC61B	10952	96	1	1	20	20	0.35	1	0	0	7	0	pS_pT	0.4	5	2	1	0	7	MPGPTPSGTNVGSSGRSPSK	MPGPT.PS.GT.NVGS.S.GRS.PS.K	1	0	0	0	1	0	1
SLC16A6	9120	523	1	231	250	20	0.35	1	0	0	7	0	pS_pT	0.45	4	4	1	0	7	TRTSIDSIDSGVELTTSPKN	T.RT.S.IDS.IDS.GVELTT.S.PKN	1	0	0	0	0	0	0
SMAP2	64744	429	1	221	240	20	0.35	1	0	0	7	0	pS_pT	0.45	7	1	1	0	7	SSSGSRKVVGSMPTAGSAGS	S.S.S.GS.RKVVGS.MPT.AGSAGS.	0	0	0	0	0	0	0
SMC1A	8243	1233	1	951	970	20	0.35	2	0	0	7	0	pS_pT	0.35	7	0	0	0	7	SQEEGSSQGEDSVSGSQRIS	S.QEEGS.S.QGEDS.VS.GS.QRIS.	0	0	0	0	0	0	1
SNRNP27	11017	155	1	51	70	20	0.35	1	0	0	7	0	pS_pT	0.4	6	1	1	0	7	SRSPRRHRSTSPSPSRLKER	S.RS.PRRHRS.T.S.PS.PS.RLKER	1	1	1	0	1	0	1
SP1	6667	785	1	41	60	20	0.35	1	0	0	7	0	pS_pT	0.5	8	2	0	0	7	SSTGSSSSTGGGGQESQPSP	S.S.T.GSS.SS.TGGGGQES.QPS.P	1	0	0	0	0	0	1
SP100	6672	885	1	451	470	20	0.4	1	0	0	8	0	pS_pT	0.4	7	1	0	0	8	SSSDFSDLSNGEELQETCSS	S.S.S.DFS.DLS.NGEELQET.CS.S.	0	0	0	0	0	0	1
SPECC1	92521	1068	1	121	150	30	0.45	1	0	0	9	0	pS_pT	0.433333	6	5	2	0	9	VPRGPSNPRKSVSSPTSSNTPTPTKHLRTP	VPRGPSNPRKS.VS.S.PT.S.S.NT.PT.PTKHLRT.P	1	0	0	0	0	0	0
SPECC1	92521	1068	2	301	330	30	0.45	1	0	0	9	0	pS_pT	0.433333	8	2	3	0	9	KKNIHGNALRTSGSSSSDVTKASLSPDASD	KKNIHGNALRT.S.GS.S.S.S.DVT.KASLS.PDAS.D	1	0	0	0	0	0	0
SRGAP1	57522	1085	1	991	1010	20	0.35	1	0	0	7	0	pS_pT	0.45	4	4	1	0	7	DTLEQVKNSPTPATSTESLS	DTLEQVKNS.PT.PAT.S.T.ES.LS.	1	0	0	0	0	0	0
SRP72	6731	671	1	621	640	20	0.4	1	0	0	8	0	pS_pT	0.45	6	3	0	0	8	SPPTSPRPGSAATVSASTSN	S.PPT.S.PRPGS.AAT.VS.AS.TS.N	1	0	0	0	1	0	1
SRPK2	6733	699	1	491	510	20	0.35	1	0	0	7	0	pS_pT	0.45	7	2	0	0	7	QEESSPSHDRSRTVSASSTG	QEES.S.PSHDRSRT.VS.AS.S.T.G	1	1	0	0	0	0	0
SRRM1	10250	904	1	641	670	30	0.35	1	0	0	10	0	pS_pT	0.533333	10	2	4	0	10	PKQRSSPVTKRRSPSLSSKHRKGSSPSRST	PKQRS.S.PVT.KRRS.PS.LS.S.KHRKGSS.PS.RS.T	1	0	1	0	1	0	1
SRRM1	10250	904	2	741	760	20	0.35	1	0	0	7	0	pS_pT	0.35	7	0	0	0	7	PQSVRRVSSSRSVSGSPEPA	PQS.VRRVS.S.S.RS.VS.GS.PEPA	1	0	0	0	1	0	1
SRRM2	23524	2752	2	471	490	20	0.35	1	0	0	7	0	pS_pT	0.4	5	2	1	0	7	KSHSHTPSRRMGRSRSPATA	KS.HS.HT.PS.RRMGRS.RS.PAT.A	1	0	1	0	0	0	1
SRRM2	23524	2752	3	761	790	30	0.4	1	0	0	11	0	pS_pT	0.5	11	0	4	0	11	SLSSPRSKAKSRLSLRRSLSGSSPCPKQKS	S.LS.S.PRS.KAKS.RLS.LRRS.LS.GS.S.PCPKQKS.	1	0	0	0	1	0	1
SRRM2	23524	2752	4	821	850	30	0.4	1	0	0	10	0	pS_pT	0.5	8	2	5	0	10	PPPKQKSKTPSRQSHSSSSPHPKVKSGTPP	PPPKQKS.KT.PS.RQS.HS.S.S.S.PHPKVKS.GT.PP	1	0	0	0	0	0	1
SRRM2	23524	2752	5	871	920	50	0.4	1	0	0	18	0	pS_pT	0.44	16	2	4	0	18	SCFESSPDPELKSRTPSRHSCSGSSPPRVKSSTPPRQSPSRSSSPQPKVK	S.CFES.S.PDPELKS.RT.PS.RHS.CS.GS.S.PPRVKS.S.T.PPRQS.PS.RS.S.S.PQPKVK	1	0	1	0	1	0	1
SRRM2	23524	2752	6	1061	1110	50	0.4	1	0	0	20	0	pS_pT	0.46	17	4	2	0	20	SQTSPDHRSDTSSPEVRQSHSESPSLQSKSQTSPKGGRSRSSSPVTELAS	S.QT.S.PDHRS.DT.S.S.PEVRQS.HS.ES.PS.LQS.KSQT.S.PKGGRS.RS.S.S.PVT.ELAS.	1	1	1	1	0	0	1
SRRM2	23524	2752	7	1401	1430	30	0.35	1	0	0	10	0	pS_pT	0.366667	9	1	1	0	10	SISSPVLDAVPRTPSRERSSSASSPEMKDG	S.IS.S.PVLDAVPRT.PS.RERS.S.S.AS.S.PEMKDG	1	1	0	0	1	0	1
SRRM2	23524	2752	9	1581	1600	20	0.35	1	0	0	7	0	pS_pT	0.45	8	0	1	0	7	SSPEVDSKSRLSPRRSRSGS	S.S.PEVDSKS.RLS.PRRS.RS.GS.	1	0	1	0	1	0	1
SRRM2	23524	2752	10	1641	1660	20	0.35	1	0	0	7	0	pS_pT	0.5	8	1	1	0	7	SSKGRGPSPEGSSSTESSPE	S.SKGRGPS.PEGS.S.ST.ES.S.PE	1	0	1	0	1	0	1
SRRM2	23524	2752	11	1671	1700	30	0.35	1	0	0	11	0	pS_pT	0.466667	8	3	3	0	11	GSRSSPEPKTKSRTPPRRRSSRSSPELTRK	GS.RS.S.PEPKT.KS.RT.PPRRRS.S.RS.S.PELT.RK	1	0	1	0	1	0	1
SRRM2	23524	2752	12	1841	1860	20	0.4	1	0	0	8	0	pS_pT	0.45	5	3	1	0	8	RSRTPPTSRKRSRSRTSPAP	RS.RT.PPT.S.RKRS.RS.RT.S.PAP	1	1	1	0	1	0	1
SRRM2	23524	2752	13	1871	1930	60	0.35	1	0	0	21	0	pS_pT	0.366667	16	6	0	0	21	ATHRRSRSRTPLISRRRSRSRTSPVSRRRSRSRTSVTRRRSRSRASPVSRRRSRSRTPPV	AT.HRRS.RS.RT.PLIS.RRRS.RS.RT.S.PVS.RRRS.RS.RT.S.VTRRRS.RS.RAS.PVS.RRRS.RS.RT.PPV	1	1	1	0	1	0	1
SRRM2	23524	2752	14	1971	1990	20	0.45	1	0	0	9	0	pS_pT	0.45	5	4	0	0	9	RSRTSPITRRRSRSRTSPVT	RS.RT.S.PIT.RRRS.RS.RT.S.PVT.	1	1	1	0	1	0	1
SSFA2	6744	1259	1	1151	1170	20	0.35	1	0	0	7	0	pS_pT	0.35	3	4	0	0	7	ASVALTPTAPSRTGSVQTPP	AS.VALT.PT.APS.RT.GS.VQT.PP	1	0	0	0	0	0	0
STIM1	6786	685	1	611	630	20	0.35	1	0	0	7	0	pS_pT	0.4	7	1	0	0	7	LDSSRSHSPSSPDPDTPSPV	LDSS.RS.HS.PS.S.PDPDT.PS.PV	1	0	1	0	0	0	0
SUB1	10923	127	1	1	20	20	0.4	1	0	0	8	0	pS_pT	0.55	9	0	2	0	8	MPKSKELVSSSSSGSDSDSE	MPKSKELVS.S.S.S.S.GS.DS.DS.E	0	0	0	0	0	0	0
SUPT6H	6830	1726	1	1521	1540	20	0.4	2	0	0	8	0	pS_pT	0.45	5	4	0	0	8	GITPSSSSRTRTPASINATP	GIT.PS.S.S.SRT.RT.PAS.INAT.P	1	0	0	0	0	0	1
TACC1	6867	805	1	41	60	20	0.35	1	0	0	7	0	pS_pT	0.4	6	1	1	0	7	EEDSQAETKSLSFSSDSEGN	EEDS.QAET.KS.LS.FS.S.DS.EGN	0	0	0	0	0	0	0
TARDBP	23435	414	1	391	410	20	0.35	1	0	0	7	0	pS_pT	0.4	7	0	1	0	7	AGSGSGFNGGFGSSMDSKSS	AGS.GS.GFNGGFGS.S.MDS.KS.S.	0	0	0	0	0	0	1
TBC1D4	9882	1298	1	741	760	20	0.35	1	0	0	7	0	pS_pT	0.45	6	2	1	0	7	SDGEGRKRTSSTCSNESLSV	SDGEGRKRT.S.S.T.CS.NES.LS.V	0	1	0	0	0	0	0
TBX3	6926	743	1	431	450	20	0.35	1	0	0	7	0	pS_pT	0.4	6	2	0	0	7	ASPDSRHSPATISSSTRGLG	AS.PDS.RHS.PAT.IS.SS.T.RGLG	1	0	1	0	0	0	0
TCOF1	6949	1488	1	191	210	20	0.4	1	0	0	8	0	pS_pT	0.5	8	2	0	0	8	VSAGQADSSSEDTSSSSDET	VSAGQADS.SS.EDT.S.S.S.S.DET.	0	0	0	0	0	0	1
TCOF1	6949	1488	2	601	620	20	0.35	2	0	0	7	0	pS_pT	0.4	7	0	1	0	7	AEKPMDNSESSEESSDSADS	AEKPMDNS.ES.S.EES.S.DS.ADS.	0	0	0	0	0	0	1
TCOF1	6949	1488	3	981	1010	30	0.45	1	0	0	11	0	pS_pT	0.4	8	3	1	0	11	ASTPRKARASESTARSSSSESEDEDVIPAT	AS.T.PRKARAS.ES.T.ARS.S.S.S.ES.EDEDVIPAT.	1	0	0	0	1	0	1
TJP1	7082	1748	1	961	980	20	0.4	1	0	0	8	0	pS_pT	0.45	5	3	0	1	8	PAPSTSYSPQADSLRTPSTE	PAPS.T.S.YS.PQADS.LRT.PS.T.E	1	0	0	0	0	0	1
TLE3	7090	772	1	281	300	20	0.4	1	0	0	8	0	pS_pT	0.6	8	2	2	0	8	KDAPTSPASVASSSSTPSSK	KDAPT.S.PAS.VAS.SS.S.T.PSS.K	1	0	0	0	0	0	1
TMPO	7112	694	1	151	180	30	0.45	1	0	0	12	0	pS_pT	0.4	8	4	0	0	12	EQGTESRSSTPLPTISSSAENTRQNGSNDS	EQGT.ES.RS.S.T.PLPT.IS.S.S.AENT.RQNGS.NDS.	1	0	0	1	0	0	0
TOR1AIP1	26092	583	1	151	170	20	0.35	2	0	0	7	0	pS_pT	0.35	6	1	0	0	7	LRDSHSSEEDEASSQTDLSQ	LRDS.HS.S.EEDEAS.S.QT.DLS.Q	0	0	0	0	0	0	0
TOX4	9878	621	1	171	190	20	0.35	1	0	0	7	0	pS_pT	0.35	4	3	0	0	7	DRLSTTPSPTSSLHEDGVED	DRLS.T.T.PS.PT.S.S.LHEDGVED	1	0	0	0	0	0	0
TP53BP1	7158	1977	2	1631	1660	30	0.45	1	0	0	12	0	pS_pT	0.566667	8	6	3	0	12	KRKRRSNVSSPATPTASSSSSTTPTRKITE	KRKRRS.NVS.S.PAT.PT.ASS.S.S.S.T.T.PTRKIT.E	1	0	0	0	0	0	1
UBAP2L	9898	1087	1	451	480	30	0.4	1	0	0	12	0	pS_pT	0.433333	11	1	1	0	12	PPSSPLPSKSTSAPQMSPGSSDNQSSSPQP	PPS.S.PLPS.KS.T.S.APQMS.PGS.S.DNQS.S.S.PQP	1	0	0	0	0	0	0
UBE4B	10277	1302	1	81	100	20	0.4	1	0	0	8	0	pS_pT	0.5	9	1	0	0	8	GVSSLSSSPSNSLETQSQSL	GVSS.LS.S.S.PS.NS.LET.QSQS.L	1	0	0	0	0	0	0
ULK1	8408	1050	1	451	470	20	0.35	1	0	0	7	0	pS_pT	0.4	5	3	0	0	7	PTQFQTPRSSAIRRSGSTSP	PTQFQT.PRS.S.AIRRS.GS.T.S.P	1	0	0	0	0	0	0
USP10	9100	798	1	201	220	20	0.35	1	0	0	7	0	pS_pT	0.4	5	3	0	0	7	PPSVTPRTCNSPQNSTDSVS	PPSVT.PRT.CNS.PQNS.T.DS.VS.	1	0	0	0	0	0	0
VASP	7408	380	1	311	330	20	0.35	1	0	0	7	0	pS_pT	0.6	6	4	2	0	7	EKNSTTLPRMKSSSSVTTSE	EKNS.TT.LPRMKS.S.S.S.VT.TSE	0	0	0	0	1	0	0
WWTR1	25937	400	1	51	70	20	0.4	1	0	0	8	0	pS_pT	0.5	8	1	1	0	8	SFFKEPDSGSHSRQSSTDSS	SFFKEPDS.GS.HS.RQS.S.T.DS.S.	0	0	0	1	1	0	0
XPO6	23214	1125	1	201	220	20	0.35	1	0	0	7	0	pS_pT	0.35	4	3	0	0	7	TAATPPPSPTSGESGDLLSN	T.AAT.PPPS.PT.S.GES.GDLLS.N	1	0	0	0	0	0	0
XRN2	22803	950	1	471	490	20	0.35	2	0	0	7	0	pS_pT	0.45	7	2	0	0	7	SPSISPNTSFTSDGSPSPLG	S.PS.IS.PNT.S.FT.SDGSPS.PLG	1	0	0	0	0	0	0
ZC3H18	124245	953	1	591	620	30	0.45	1	0	0	10	0	pS_pT	0.466667	13	1	0	0	10	SFSGSRSRSRSFSSSPSPSPTPSPHRPSIR	SFSGSRSRS.RS.FS.S.S.PS.PS.PT.PS.PHRPS.IR	1	1	0	1	1	0	0
ZC3HC1	51530	502	1	341	360	20	0.35	1	0	0	7	0	pS_pT	0.4	6	1	1	0	7	AEKSPGPIVSRTRSWDSSSP	AEKS.PGPIVS.RT.RS.WDS.S.S.P	1	0	0	0	0	0	0
ZC3HC1	51530	502	2	401	420	20	0.35	1	0	0	7	0	pS_pT	0.5	8	1	1	0	7	KRARLCSSSSSDTSSRSFFD	KRARLCS.S.S.S.S.DT.S.SRSFFD	0	1	0	0	0	0	0
ZDHHC5	25921	715	1	411	440	30	0.35	1	0	0	9	0	pS_pT	0.4	8	2	2	0	9	TFGKSFHFDPLSSGSRSSSLKSAQGTGFEL	T.FGKS.FHFDPLS.S.GS.RS.SS.LKS.AQGT.GFEL	0	0	0	0	1	0	0
ZEB1	6935	1124	1	311	330	20	0.35	1	0	0	7	0	pS_pT	0.35	6	1	0	0	7	CSSPSLSASPGSPTRPQIRQ	CS.S.PS.LS.AS.PGS.PT.RPQIRQ	1	0	0	0	0	0	1
AAK1	22848	961	1	671	690	20	0.4	2	0	0	7	1	pS_pT;pY	0.45	4	4	0	1	8	ATTTPSGSPRTSQQNVYNPS	AT.TT.PS.GS.PRT.S.QQNVY.NPS.	1	0	0	0	0	0	0
ABLIM1	3983	778	1	351	370	20	0.4	2	0	0	7	1	pS_pT;pY	0.45	7	1	0	1	8	TSSESIYSRPGSSIPGSPGH	TS.S.ES.IY.S.RPGS.S.IPGS.PGH	1	0	0	0	0	0	0
ACIN1	22985	1341	1	661	680	20	0.35	2	0	0	6	1	pS_pT;pY	0.55	6	3	1	1	7	SRDSSTSYTETKDPSSGQEV	S.RDS.ST.SY.TET.KDPS.S.GQEV	0	0	0	0	0	0	1
ADRB2	154	413	1	341	360	20	0.35	2	0	0	5	2	pS_pT;pY	0.4	4	1	1	2	7	CLRRSSLKAYGNGYSSNGNT	CLRRS.S.LKAY.GNGY.S.S.NGNT.	0	0	0	0	0	0	0
BCKDHA	593	445	1	331	350	20	0.35	2	0	0	5	2	pS_pT;pY	0.4	5	1	0	2	7	YRIGHHSTSDDSSAYRSVDE	Y.RIGHHS.T.S.DDS.SAY.RS.VDE	0	0	0	0	0	0	0
BCLAF1	9774	920	2	271	300	30	0.45	2	0	0	10	1	pS_pT;pY	0.366667	10	0	0	1	11	RSGSGSVGNGSSRYSPSQNSPIHHIPSRRS	RS.GS.GS.VGNGS.S.RY.S.PS.QNS.PIHHIPS.RRS.	1	0	1	0	0	0	0
CCDC6	8030	474	1	351	380	30	0.45	2	0	0	12	2	pS_pT;pY	0.466667	9	3	0	2	14	SSPIPYTPSPSSSRPISPGLSYASHTVGFT	S.S.PIPY.T.PS.PS.S.S.RPIS.PGLS.Y.AS.HT.VGFT.	1	0	1	0	1	0	0
CCKBR	887	447	1	428	447	20	0.35	2	0	0	6	1	pS_pT;pY	0.45	5	3	0	1	7	PSIASLSRLSYTTISTLGPG	PSIASLS.RLS.Y.T.T.IS.T.LGPG	0	0	0	0	0	0	0
CD2AP	23607	639	2	541	560	20	0.35	2	0	0	5	2	pS_pT;pY	0.6	6	2	2	2	7	YSPKPSVYLSTPSSASKANT	Y.S.PKPSVY.LST.PS.S.AS.KANT	1	0	0	0	0	0	1
CDC40	51362	579	1	11	30	20	0.4	2	0	0	7	1	pS_pT;pY	0.5	9	0	0	1	8	SYGSGSGSESDSDSESSRCP	SY.GS.GS.GS.ES.DS.DS.ESS.RCP	0	0	0	0	0	0	1
CDK12	51755	1490	1	301	320	20	0.4	2	0	0	6	2	pS_pT;pY	0.6	9	0	0	3	8	SVSPYSRRRSSSYERSGSYS	S.VS.PY.S.RRRSSSYERS.GS.Y.S.	1	1	0	0	1	0	1
CHAF1A	10036	956	1	761	790	30	0.35	2	0	0	7	1	pS_pT;pY	0.366667	5	5	0	1	8	CRRGLLSNHTGSPRSPSTTYLHTPTPSEDA	CRRGLLS.NHTGS.PRS.PS.T.T.Y.LHT.PTPSEDA	1	0	0	0	0	0	1
CHD4	1108	1912	2	321	340	20	0.4	2	0	0	7	1	pS_pT;pY	0.5	8	1	0	1	8	FDDASINSYSVSDGSTSRSS	FDDAS.INS.Y.S.VS.DGS.T.S.RSS	0	0	0	1	0	0	1
CTPS1	1503	591	1	561	590	30	0.45	2	0	0	10	1	pS_pT;pY	0.4	8	2	1	1	11	LSPRDTYSDRSGSSSPDSEITELKFPSINH	LS.PRDT.Y.S.DRS.GS.S.S.PDS.EIT.ELKFPS.INH	1	0	0	0	0	0	0
CTPS2	56474	586	1	561	580	20	0.35	2	0	0	6	1	pS_pT;pY	0.4	7	0	0	1	7	LSSSDRYSDASDDSFSEPRI	LSS.S.DRY.S.DAS.DDS.FS.EPRI	0	0	0	0	0	0	0
EDNRB	1910	442	1	423	442	20	0.35	2	0	0	5	2	pS_pT;pY	0.45	5	0	2	2	7	FKANDHGYDNFRSSNKYSSS	FKANDHGY.DNFRS.S.NKY.S.S.S.	0	0	0	0	0	0	0
EIF4EBP1	1978	118	1	31	50	20	0.45	2	0	0	8	1	pS_pT;pY	0.45	2	6	0	1	9	PGDYSTTPGGTLFSTTPGGT	PGDY.S.T.T.PGGT.LFS.T.T.PGGT.	1	0	0	0	0	0	0
EIF4EBP2	1979	120	1	31	50	20	0.35	2	0	0	6	1	pS_pT;pY	0.4	1	6	0	1	7	PHDYCTTPGGTLFSTTPGGT	PHDY.CT.T.PGGT.LFS.T.T.PGGT	1	0	0	0	0	0	0
EMD	2010	254	1	41	70	30	0.45	3	0	0	9	2	pS_pT;pY	0.433333	9	2	0	2	11	YETQRRRLSPPSSSAASSYSFSDLNSTRGD	Y.ETQRRRLS.PPS.SS.AAS.S.Y.S.FS.DLNS.T.RGD	1	0	1	0	1	0	1
EMD	2010	254	3	161	180	20	0.4	2	0	0	6	2	pS_pT;pY	0.45	6	1	0	2	8	YQSITHYRPVSASRSSLDLS	Y.QS.IT.HY.RPVS.AS.RS.SLDLS.	0	0	0	0	1	0	1
EPRS	2058	1512	1	871	900	30	0.35	3	0	0	8	1	pS_pT;pY	0.3	6	2	0	1	9	EYIPGQPPLSQSSDSSPTRNSEPAGLETPE	EY.IPGQPPLS.QS.S.DS.S.PT.RNS.EPAGLET.PE	1	0	0	0	0	0	1
FAM125A	93343	273	1	191	210	20	0.35	2	0	0	5	2	pS_pT;pY	0.4	5	1	0	2	7	GSRASTLRRNDSIYEASSLY	GSRAS.T.LRRNDS.IY.EAS.S.LY.	0	0	0	0	1	0	0
GAPVD1	26130	1487	1	451	470	20	0.4	2	0	0	7	1	pS_pT;pY	0.5	4	4	1	1	8	KSSSLEMTPYNTPQLSPATT	KSS.S.LEMT.PY.NT.PQLS.PAT.T.	1	0	0	0	0	0	0
HNRNPA1	3178	372	2	351	372	22	0.45	4	0	0	7	2	pS_pT;pY	0.409091	7	0	0	2	9	PRNQGGYGGSSSSSSYGSGRRF	PRNQGGY.GGS.S.S.S.S.S.Y.GS.GRRF	0	0	0	0	0	0	1
HNRNPA3	220988	378	1	351	370	20	0.35	2	0	0	5	2	pS_pT;pY	0.35	5	0	0	2	7	FGGRSSGSPYGGGYGSGGGS	FGGRS.S.GS.PY.GGGY.GS.GGGS.	1	0	0	0	0	0	1
IRS2	8660	1338	1	591	610	20	0.35	2	0	0	6	1	pS_pT;pY	0.4	5	2	0	1	7	SSASLDEYTLMRATFSGSAG	S.S.AS.LDEY.TLMRAT.FS.GS.AG	0	0	0	0	0	0	1
KIAA0528	9847	1000	1	281	310	30	0.4	2	0	0	10	1	pS_pT;pY	0.6	11	3	2	2	11	SGPSTPLKNQTYSFSPSKSYSRQSSSSDTD	S.GPS.T.PLKNQTY.S.FS.PS.KSYSRQS.S.S.S.DTD	1	0	0	0	1	0	0
KRT18	3875	430	1	1	60	60	0.4	2	0	0	18	3	pS_pT;pY	0.4	16	5	0	3	21	MSFTTRSTFSTNYRSLGSVQAPSYGARPVSSAASVYAGAGGSGSRISVSRSTSFRGGMGS	MSFTTRS.T.FS.T.NY.RS.LGS.VQAPS.Y.GARPVS.S.AAS.VY.AGAGGS.GS.RIS.VS.RS.T.S.FRGGMGS.	0	0	0	1	1	0	1
KRT8	3856	483	3	421	460	40	0.4	2	0	0	12	2	pS_pT;pY	0.475	15	2	0	2	14	GGLSSAYGGLTSPGLSYSLGSSFGSGAGSSSFSRTSSSRA	GGLS.SAY.GGLT.S.PGLS.Y.S.LGS.S.FGS.GAGSSS.FSRT.S.S.SRA	1	0	0	0	1	0	1
LARP1	23367	1019	1	691	710	20	0.35	2	0	0	6	1	pS_pT;pY	0.35	1	5	0	1	7	PTTVPESPNYRNTRTPRTPR	PT.T.VPES.PNY.RNT.RT.PRT.PR	1	0	0	0	0	0	0
LARP1	23367	1019	2	761	790	30	0.45	3	0	0	11	1	pS_pT;pY	0.4	7	4	0	1	12	SREHRPRTASISSSPSEGTPTVGSYGCTPQ	S.REHRPRT.AS.IS.S.S.PS.EGT.PT.VGS.Y.GCT.PQ	1	1	0	0	0	0	0
LAT	27040	269	1	71	90	20	0.35	2	0	0	6	1	pS_pT;pY	0.45	5	1	1	2	7	SYDSTSSDSLYPRGIQFKRP	S.YDS.T.S.S.DS.LY.PRGIQFKRP	0	0	0	0	0	0	1
MAP1B	4131	2468	1	1321	1340	20	0.45	2	0	0	7	2	pS_pT;pY	0.45	5	2	0	2	9	VSPSQSVTGSAGHTPYYQSP	VS.PS.QS.VT.GS.AGHT.PY.Y.QS.P	1	0	0	0	0	0	1
MAP1B	4131	2468	2	1781	1800	20	0.4	2	0	0	7	1	pS_pT;pY	0.45	5	2	1	1	8	KSDISPLTPRESSPLYSPTF	KS.DIS.PLT.PRES.S.PLY.S.PT.F	1	0	1	0	0	0	1
MAP1B	4131	2468	3	1811	1830	20	0.35	2	0	0	6	1	pS_pT;pY	0.4	5	2	0	1	7	TATCHSSSSPPIDAASAEPY	T.AT.CHS.S.S.S.PPIDAASAEPY.	1	0	0	0	0	0	1
MAPT	4137	776	1	531	550	20	0.45	2	0	0	8	1	pS_pT;pY	0.45	6	2	0	1	9	GYSSPGSPGTPGSRSRTPSL	GY.S.S.PGS.PGT.PGS.RS.RT.PS.L	1	1	0	1	1	0	0
MYO18A	399687	2054	2	2031	2054	24	0.35	2	0	0	5	2	pS_pT;pY	0.458333	5	3	1	2	7	SRPRYSHSYLSDSDTEAKLTETNA	SRPRY.S.HS.Y.LS.DS.DT.EAKLTETNA	0	0	0	0	0	0	0
MYPN	84665	1320	1	241	270	30	0.35	2	0	0	6	2	pS_pT;pY	0.3	5	2	0	2	8	AASEAAGGDTTPGSSPSSLYYEEPLGQPPR	AASEAAGGDT.T.PGS.S.PS.S.LY.Y.EEPLGQPPR	1	0	0	0	0	0	0
NCOR2	9612	2524	1	2051	2070	20	0.35	2	0	0	6	1	pS_pT;pY	0.4	7	0	0	1	7	HGSSYSPEGVEPVSPVSSPS	HGS.SY.S.PEGVEPVS.PVS.S.PS.	1	0	0	0	0	0	1
NKTR	4820	1462	1	401	420	20	0.35	2	0	0	4	3	pS_pT;pY	0.55	7	1	0	3	7	SLSQRSRSWSYNGYYSDLST	SLSQRS.RS.WS.Y.NGY.Y.S.DLST	0	1	0	0	0	0	0
NUFIP2	57532	695	1	211	230	20	0.35	2	0	0	6	1	pS_pT;pY	0.5	4	2	3	1	7	GSGSESGYTTPKKRKARRNS	GS.GS.ES.GY.T.T.PKKRKARRNS.	1	0	0	0	0	0	0
NUMA1	4926	2115	1	1821	1850	30	0.4	2	0	0	8	1	pS_pT;pY	0.366667	7	1	2	1	9	KKLDVEEPDSANSSFYSTRSAPASQASLRA	KKLDVEEPDS.ANS.S.FY.S.T.RS.APAS.QAS.LRA	0	0	0	0	0	0	1
NUP153	9972	1475	1	101	130	30	0.35	2	0	0	8	1	pS_pT;pY	0.4	5	6	0	1	9	ITPEPAVSNTEEPSTTSTASNYPDVLTRPS	IT.PEPAVSNT.EEPST.T.S.T.AS.NY.PDVLTRPS.	1	0	0	0	0	0	1
OCLN	100506658	522	1	391	410	20	0.35	2	0	0	5	2	pS_pT;pY	0.4	1	4	1	2	7	KRTEQDHYETDYTTGGESCD	KRT.EQDHY.ET.DY.T.T.GGES.CD	0	0	0	0	0	0	0
PHLDB2	90102	1253	1	241	260	20	0.35	2	0	0	5	2	pS_pT;pY	0.5	7	0	0	3	7	YSSSSLSHMGAYSRSLPRLY	Y.S.S.S.S.LSHMGAY.SRS.LPRLY	0	0	0	1	0	0	0
PKP2	5318	881	1	151	170	20	0.45	2	0	0	6	3	pS_pT;pY	0.45	5	1	0	3	9	SPDSSPERAHYTHSDYQYSQ	S.PDS.S.PERAHY.T.HS.DY.QY.S.Q	1	0	0	0	0	0	0
PKP4	8502	1192	1	411	430	20	0.35	2	0	0	3	4	pS_pT;pY	0.4	2	2	0	4	7	ITPIYEGRTYYSPVYRSPNH	IT.PIY.EGRTY.Y.S.PVY.RS.PNH	1	0	0	0	0	0	1
PLEC	5339	4684	1	4371	4410	40	0.55	2	0	0	14	1	pS_pT;pY	0.375	13	1	0	1	15	DMLSGNAGGFRSRSSSVGSSSSYPISPAVSRTQLASWSDP	DMLS.GNAGGFRS.RS.S.S.VGS.S.S.S.Y.PIS.PAVS.RT.QLAS.WS.DP	1	1	0	1	0	0	1
POLR2A	5430	1970	1	1831	1920	90	0.6	2	0	0	33	10	pS_pT;pY	0.7	25	19	6	13	43	SYSPTSPKYTPTSPSYSPSSPEYTPTSPKYSPTSPKYSPTSPKYSPTSPTYSPTTPKYSPTSPTYSPTSPVYTPTSPKYSPTSPTYSPTS	SYS.PTS.PKY.T.PT.S.PS.Y.S.PS.S.PEY.T.PT.S.PKYS.PT.S.PKYSPTSPKY.S.PT.S.PTY.S.PT.T.PKY.S.PT.SPT.Y.S.PT.S.PVY.T.PT.S.PKY.SPTSPTY.S.PT.S.	1	0	0	0	0	0	1
POM121	9883	984	1	111	140	30	0.4	2	0	0	9	1	pS_pT;pY	0.433333	10	1	1	1	10	LNSQSSDDHLNKRSRSSSMSSLTGAYASGI	LNS.QS.SDDHLNKRS.RS.S.S.MS.S.LT.GAY.ASGI	0	1	0	0	0	0	1
PRPF31	26121	499	1	431	450	20	0.35	3	0	0	6	1	pS_pT;pY	0.45	5	2	1	1	7	QSVVYGGKSTIRDRSSGTAS	QSVVY.GGKS.T.IRDRS.S.GT.AS.	0	0	0	0	1	0	1
RANBP9	10048	729	1	471	490	20	0.35	2	0	0	6	1	pS_pT;pY	0.4	7	0	0	1	7	QDSYPVSPRPFSSPSMSPSH	QDSY.PVS.PRPFS.S.PS.MS.PS.H	1	0	0	0	0	0	0
RBMX	27316	391	2	311	340	30	0.45	2	0	0	7	4	pS_pT;pY	0.5	11	0	0	4	11	DDYSSSRDGYGGSRDSYSSSRSDLYSSGRD	DDY.SSSRDGY.GGS.RDS.Y.S.S.S.RS.DLY.SS.GRD	0	0	0	0	0	0	1
RICTOR	253260	1708	2	1401	1420	20	0.35	2	0	0	6	1	pS_pT;pY	0.45	6	2	0	1	7	NTLQRSSSVRSMVSSATYGG	NTLQRS.S.SVRS.MVS.S.AT.Y.GG	0	0	0	0	1	0	1
RPA2	6118	270	1	1	30	30	0.35	2	0	0	8	2	pS_pT;pY	0.366667	7	1	0	3	10	MWNSGFESYGSSSYGGAGGYTQSPGGFGSP	MWNS.GFES.Y.GS.S.S.Y.GGAGGYT.QS.PGGFGS.P	1	0	0	0	0	0	1
SEC16A	9919	2357	1	581	610	30	0.4	2	0	0	10	1	pS_pT;pY	0.433333	8	3	1	1	11	SQNYRGSVSQPSTPSPPKPTGIFQTSANSS	SQNY.RGS.VS.QPS.T.PS.PPKPT.GIFQT.S.ANS.S.	1	0	0	0	0	0	1
SESTD1	91404	696	1	651	670	20	0.35	2	0	0	5	2	pS_pT;pY	0.35	3	2	0	2	7	YPDGTEQYFGSPSDMASTAE	Y.PDGT.EQY.FGS.PS.DMAS.T.AE	1	0	0	0	0	0	0
SLC4A1	6521	911	1	31	60	30	0.35	2	0	0	7	1	pS_pT;pY	0.333333	1	6	1	2	8	MEEPAAHDTEATATDYHTTSHPGTHKVYVE	MEEPAAHDT.EAT.AT.DY.HT.T.S.HPGT.HKVYVE	0	0	0	0	0	0	0
SRFBP1	153443	429	1	261	280	20	0.35	2	0	0	6	1	pS_pT;pY	0.4	5	1	1	1	7	FDDSTEERFYKQSSMSEDSD	FDDS.T.EERFY.KQS.S.MS.EDS.D	0	0	0	0	0	0	0
SRRM2	23524	2752	1	311	360	50	0.45	2	0	0	18	1	pS_pT;pY	0.5	11	7	6	1	19	SEPGTTSTQRPSSPETATKQPSSPYEDKDKDKKEKSATRPSPSPERSSTG	S.EPGT.T.S.T.QRPS.S.PET.AT.KQPS.S.PY.EDKDKDKKEKS.AT.RPS.PS.PERS.S.T.G	1	0	1	0	1	0	1
SRRM2	23524	2752	15	2311	2330	20	0.4	2	0	0	7	1	pS_pT;pY	0.45	4	4	0	1	8	LTGSGTPPTAANYPSSSRTP	LT.GS.GT.PPT.AANY.PS.S.SRT.P	1	0	0	0	0	0	1
SRSF1	6426	248	1	201	240	40	0.45	2	0	0	15	3	pS_pT;pY	0.475	16	0	0	3	18	SYGRSRSRSRSRSRSRSRSNSRSRSYSPRRSRGSPRYSPR	S.Y.GRS.RS.RS.RS.RSRS.RS.RS.NS.RS.RS.Y.S.PRRS.RGS.PRY.S.PR	1	1	1	0	1	0	1
SUN2	25777	717	1	11	40	30	0.45	2	0	0	11	1	pS_pT;pY	0.433333	10	1	1	1	12	YSQGDDDGSSSSGGSSVAGSQSTLFKDSPL	Y.S.QGDDDGS.S.S.S.GGS.S.VAGS.QS.T.LFKDS.PL	1	0	0	0	0	0	1
TJP2	9414	1190	1	411	440	30	0.4	2	0	0	7	3	pS_pT;pY	0.4	7	0	2	3	10	NRSFSPEERRHQYSDYDYHSSSEKLKERPS	NRS.FS.PEERRHQY.S.DY.DY.HS.S.S.EKLKERPS.	1	0	1	0	0	0	1
TRA2A	29896	282	1	81	100	20	0.45	2	0	0	7	2	pS_pT;pY	0.45	6	1	0	2	9	RSRSRSYTPEYRRRRSRSHS	RS.RS.RS.Y.T.PEY.RRRRS.RS.HS.	1	1	0	0	0	0	0
TRA2A	29896	282	3	261	280	20	0.35	2	0	0	5	2	pS_pT;pY	0.55	7	0	0	4	7	PSPYYSRYRSRSRSRSYSPR	PS.PY.Y.S.RYRSRS.RS.RS.YSPR	1	1	1	0	1	0	0
TRA2B	6434	288	1	261	288	28	0.4	2	0	0	8	2	pS_pT;pY	0.464286	8	0	0	5	10	RRRSPSPYYSRGGYRSRSRSRSYSPRRY	RRRS.PS.PY.Y.S.RGGYRS.RS.RS.RS.YS.PRRY	1	1	1	1	1	0	1
VIM	7431	466	1	11	70	60	0.55	2	0	0	19	4	pS_pT;pY	0.45	15	7	0	5	23	YRRMFGGPGTASRPSSSRSYVTTSTRTYSLGSALRPSTSRSLYASSPGGVYATRSSAVRL	YRRMFGGPGT.AS.RPS.S.S.RS.Y.VT.T.S.TRTY.S.LGS.ALRPS.T.S.RS.LY.AS.S.PGGVY.ATRS.S.AVRL	1	0	0	1	1	0	1
WEE1	7465	646	1	121	140	20	0.35	2	0	0	6	1	pS_pT;pY	0.45	7	0	1	1	7	SSSPVKSPAAPYFLGSSFSP	S.SS.PVKS.PAAPY.FLGS.S.FS.P	1	0	0	0	0	0	0
YES1	7525	543	1	21	40	20	0.35	2	0	0	6	1	pS_pT;pY	0.45	4	4	0	1	7	TPEPVSTSVSHYGAEPTTVS	T.PEPVS.T.S.VS.HY.GAEPTTVS.	1	0	0	0	0	0	1
YTHDC1	91746	727	1	311	330	20	0.35	2	0	0	6	1	pS_pT;pY	0.45	6	0	2	1	7	VFDRSGSSASESYAGSEKKH	VFDRS.GS.S.AS.ES.Y.AGS.EKKH	0	0	0	0	0	0	0
ZNRF2	223082	242	1	101	120	20	0.4	2	0	0	7	1	pS_pT;pY	0.45	8	0	0	1	8	FSIPNSSSGPYGSQDSVHSS	FSIPNS.S.S.GPY.GS.QDS.VHS.S.	0	0	0	0	0	0	0
APEX1	328	318	1	21	40	20	0.35	2	3	4	0	0	Ub;Ac	0.4	1	1	6	0	7	PEAKKSKTAAKKNDKEAAGE	PEAK.K.SK.TAAK.K.NDK.EAAGE	0	0	0	0	0	0	1
ATP5O	539	213	1	51	70	20	0.35	3	4	3	0	0	Ub;Ac	0.2	0	0	4	0	7	KQNKLEQVEKELLRVAQILK	K.QNK.LEQVEK.ELLRVAQILK.	0	0	0	0	0	0	0
DDX5	1655	614	1	41	60	20	0.35	2	2	5	0	0	Ub;Ac	0.3	0	0	5	1	7	LVKKKWNLDELPKFEKNFYQ	LVK.K.K.WNLDELPK.FEK.NFYQ	0	0	0	0	0	0	1
EEF1A1	1915	462	2	381	400	20	0.35	2	4	3	0	0	Ub;Ac	0.3	2	0	4	0	7	RRSGKKLEDGPKFLKSGDAA	RRSGK.K.LEDGPK.FLK.SGDAA	0	0	0	0	0	0	1
ENO1	2023	434	2	191	210	20	0.35	3	3	4	0	0	Ub;Ac	0.3	0	1	4	1	7	NLKNVIKEKYGKDATNVGDE	NLK.NVIK.EK.YGK.DATNVGDE	0	0	0	0	0	0	0
GAPDH	2597	335	1	251	270	20	0.35	2	4	3	0	0	Ub;Ac	0.35	1	0	5	1	7	KPAKYDDIKKVVKQASEGPL	K.PAK.YDDIK.KVVK.QASEGPL	0	0	0	0	0	0	1
GJB2	2706	226	1	101	120	20	0.45	3	3	6	0	0	Ub;Ac	0.35	1	0	6	0	9	EKKRKFIKGEIKSEFKDIEE	EK.K.RK.FIK.GEIK.SEFK.DIEE	0	0	0	0	0	0	0
HSPA5	3309	654	1	111	130	20	0.4	2	3	5	0	0	Ub;Ac	0.35	0	1	5	1	8	DIKFLPFKVVEKKTKPYIQV	DIK.FLPFK.VVEK.K.TK.PYIQV	0	0	0	0	0	0	1
LDHB	3945	334	1	315	334	20	0.35	2	4	3	0	0	Ub;Ac	0.3	1	1	4	0	7	AQLKKSADTLWDIQKDLKDL	AQLK.K.SADTLWDIQK.DLK.DL	0	0	0	0	0	0	0
LMNA	4000	664	1	251	270	20	0.35	3	4	3	0	0	Ub;Ac	0.4	1	1	4	2	7	QHEDQVEQYKKELEKTYSAK	QHEDQVEQYK.K.ELEK.TYSAK.	0	0	0	0	0	0	1
ACTA2	59	377	2	311	330	20	0.35	3	3	2	2	0	Ub;Ac;pS_pT	0.3	1	2	3	0	7	IADRMQKEITALAPSTMKIK	IADRMQK.EITALAPS.T.MK.IK.	0	0	0	0	0	0	1
ACTG1	71	375	1	311	330	20	0.35	3	3	2	2	0	Ub;Ac;pS_pT	0.3	1	2	3	0	7	DRMQKEITALAPSTMKIKII	DRMQK.EIT.ALAPS.TMK.IK.II	0	0	0	0	0	0	1
CBX5	23468	191	1	91	110	20	0.4	3	2	2	4	0	Ub;Ac;pS_pT	0.5	5	0	5	0	8	KSNFSNSADDIKSKKKREQS	K.S.NFS.NS.ADDIK.SKKK.REQS.	0	0	0	0	0	0	1
CDKN1A	1026	164	1	141	164	24	0.5	3	4	4	4	0	Ub;Ac;pS_pT	0.416667	3	2	4	1	12	KRRQTSMTDFYHSKRRLIFSKRKP	K.RRQT.S.MTDFYHS.K.RRLIFS.K.RK.P	0	0	0	0	0	0	1
CFL1	1072	166	1	11	30	20	0.35	3	2	2	3	0	Ub;Ac;pS_pT	0.35	2	1	4	0	7	VIKVFNDMKVRKSSTPEEVK	VIK.VFNDMK.VRKS.S.T.PEEVK	1	0	0	0	0	0	0
H2AFX	3014	143	1	111	140	30	0.35	3	4	1	5	0	Ub;Ac;pS_pT	0.366667	3	3	5	0	10	NIQAVLLPKKTSATVGPKAPSGGKKATQAS	NIQAVLLPK.K.T.S.AT.VGPK.APSGGKK.AT.QAS.	0	0	0	0	0	0	1
HIST1H2BB	3018	126	3	107	126	20	0.45	3	4	3	2	0	Ub;Ac;pS_pT	0.55	3	3	4	1	9	LAKHAVSEGTKAVTKYTSSK	LAK.HAVSEGT.K.AVT.K.YTSSK.	0	0	0	0	0	0	1
HIST1H3A	8350	136	1	1	30	30	0.55	3	4	5	5	0	Ub;Ac;pS_pT	0.4	2	4	6	0	14	MARTKQTARKSTGGKAPRKQLATKAARKSA	MART.KQT.ARK.S.T.GGK.APRK.QLATK.AARK.S.A	0	0	0	0	0	0	1
HMGA1	3159	107	1	31	50	20	0.4	3	2	2	4	0	Ub;Ac;pS_pT	0.3	3	1	2	0	8	KQPPVSPGTALVGSQKEPSE	K.QPPVS.PGT.ALVGS.QK.EPS.E	1	0	0	0	0	1	0
HMGN1	3150	100	1	1	20	20	0.35	3	1	4	2	0	Ub;Ac;pS_pT	0.3	2	0	4	0	7	MPKRKVSSAEGAAKEEPKRR	MPK.RK.VS.S.AEGAAK.EEPK.RR	0	0	0	0	0	0	0
HMGN1	3150	100	2	71	100	30	0.4	3	3	1	5	0	Ub;Ac;pS_pT	0.3	3	2	4	0	9	KEDLPAENGETKTEESPASDEAGEKEAKSD	K.EDLPAENGET.K.T.EES.PAS.DEAGEK.EAKS.D	1	0	0	0	0	1	0
HNRNPA1	3178	372	1	1	20	20	0.35	3	3	1	3	0	Ub;Ac;pS_pT	0.3	3	0	3	0	7	MSKSESPKEPEQLRKLFIGG	MS.K.S.ES.PK.EPEQLRK.LFIGG	1	0	0	0	0	0	1
KRT8	3856	483	2	91	120	30	0.35	3	5	3	1	0	Ub;Ac;pS_pT	0.233333	1	1	5	0	9	EKEQIKTLNNKFASFIDKVRFLEQQNKMLE	EK.EQIK.TLNNK.FAS.FIDK.VRFLEQQNK.MLE	0	0	0	0	0	0	1
LMNA	4000	664	2	391	430	40	0.5	3	2	1	15	0	Ub;Ac;pS_pT	0.475	12	4	3	0	18	PSPTSQRSRGRASSHSSQTQGGGSVTKKRKLESTESRSSF	PS.PT.S.QRS.RGRAS.S.HS.S.QT.QGGGS.VT.K.KRK.LES.T.ES.RSS.F	1	1	0	0	1	1	1
LMNB2	84823	600	1	371	410	40	0.4	3	2	1	12	0	Ub;Ac;pS_pT	0.425	11	3	2	1	15	YRKLLEGEEERLKLSPSPSSRVTVSRATSSSSGSLSATGR	YRK.LLEGEEERLK.LS.PS.PS.S.RVTVSRAT.S.S.S.S.GS.LS.AT.GR	1	0	0	0	1	1	1
NME1-NME2	654364	267	1	231	250	20	0.35	3	3	2	2	0	Ub;Ac;pS_pT	0.35	4	0	3	0	7	IIHGSDSVKSAEKEISLWFK	IIHGS.DS.VK.SAEK.EISLWFK.	0	0	0	0	0	0	1
NPM1	4869	294	2	241	260	20	0.4	3	3	1	4	0	Ub;Ac;pS_pT	0.35	4	0	3	0	8	PSSVEDIKAKMQASIEKGGS	PS.S.VEDIK.AK.MQAS.IEK.GGS.	0	0	0	0	0	0	1
PSMD1	5707	953	1	291	320	30	0.35	3	4	1	5	0	Ub;Ac;pS_pT	0.4	5	3	4	0	10	EKDSDSMETEEKTSSAFVGKTPEASPEPKD	EK.DSDS.MET.EEK.TSS.AFVGK.T.PEAS.PEPK.D	1	0	0	0	0	1	1
PTMA	5757	111	1	1	20	20	0.4	3	1	1	6	0	Ub;Ac;pS_pT	0.45	3	3	3	0	8	MSDAAVDTSSEITTKDLKEK	MS.DAAVDT.S.S.EIT.T.K.DLKEK.	0	0	0	0	0	0	0
RPL19	6143	196	1	177	196	20	0.35	3	5	1	1	0	Ub;Ac;pS_pT	0.45	1	2	6	0	7	LQAKKEEIIKTLSKEEETKK	LQAK.K.EEIIK.T.LSK.EEETK.K	0	0	0	0	0	0	1
RPLP2	6181	115	1	11	30	20	0.35	3	3	1	3	0	Ub;Ac;pS_pT	0.35	4	0	3	0	7	ALGGNSSPSAKDIKKILDSV	ALGGNS.S.PS.AK.DIK.K.ILDSV	1	0	0	0	0	0	1
SF3B1	23451	1304	1	331	350	20	0.35	3	1	1	5	0	Ub;Ac;pS_pT	0.4	4	2	2	0	7	ASKRKSRWDETPASQMGGST	AS.K.RKSRWDET.PAS.QMGGS.T.	1	0	0	0	0	1	1
SUB1	10923	127	2	51	70	20	0.35	3	2	1	4	0	Ub;Ac;pS_pT	0.4	6	0	2	0	7	SSKQSSSSRDDNMFQIGKMR	SS.K.QS.S.SS.RDDNMFQIGK.MR	0	0	0	0	0	0	0
TMSB10	9168	44	1	11	40	30	0.35	3	3	3	4	0	Ub;Ac;pS_pT	0.433333	1	5	7	0	10	ASFDKAKLKKTETQEKNTLPTKETIEQEKR	AS.FDK.AKLKKT.ET.QEK.NTLPT.K.ETIEQEK.R	0	0	0	0	0	0	0
TMSB4X	7114	44	1	21	44	24	0.5	3	3	3	4	0	Ub;Ac;pS_pT	0.333333	2	3	3	0	10	TETQEKNPLPSKETIEQEKQAGES	T.ET.QEK.NPLPS.K.ET.IEQEK.QAGES	0	0	0	0	0	0	0
TP53	7157	393	1	301	330	30	0.5	3	4	4	4	0	Ub;Ac;pS_pT	0.4	4	3	4	1	12	PGSTKRALPNNTSSSPQPKKKPLDGEYFTL	PGSTK.RALPNNT.S.S.S.PQPK.K.K.PLDGEYFTL	1	0	0	0	0	1	1
TP53	7157	393	2	361	393	33	0.75	3	6	6	7	0	Ub;Ac;pS_pT	0.454545	7	2	6	0	19	GSRAHSSHLKSKKGQSTSRHKKLMFKTEGPDSD	GSRAHS.SHLK.S.K.K.GQS.T.S.RHK.K.LMFK.T.EGPDS.D	0	0	0	0	0	0	1
TUBA1B	10376	451	1	321	340	20	0.35	3	3	1	3	0	Ub;Ac;pS_pT	0.3	1	2	3	0	7	GDVVPKDVNAAIATIKTKRS	GDVVPK.DVNAAIAT.IK.T.K.RS.	0	0	0	0	0	0	1
VCP	7415	806	1	1	20	20	0.4	3	2	2	4	0	Ub;Ac;pS_pT	0.35	3	1	3	0	8	MASGADSKGDDLSTAILKQK	MAS.GADS.K.GDDLS.T.AILK.QK	0	0	0	0	0	0	1
VCP	7415	806	2	501	530	30	0.4	3	5	4	3	0	Ub;Ac;pS_pT	0.3	1	2	5	1	12	DKFLKFGMTPSKGVLFYGPPGCGKTLLAKA	DK.FLK.FGMT.PS.K.GVLFYGPPGCGK.T.LLAK.A	1	0	0	0	0	0	1
VCP	7415	806	3	651	680	30	0.45	4	4	4	3	0	Ub;Ac;pS_pT	0.266667	2	1	5	0	11	KSRVAILKANLRKSPVAKDVDLEFLAKMTN	K.S.RVAILK.ANLRK.S.PVAK.DVDLEFLAK.MT.N	1	0	1	0	0	0	1
XRCC6	2547	609	1	541	560	20	0.35	3	2	4	1	0	Ub;Ac;pS_pT	0.45	3	1	4	1	7	TKRKHDNEGSGSKRPKVEYS	TK.RK.HDNEGS.GSK.RPK.VEYS	0	0	0	0	0	0	1
ZYX	7791	572	1	261	290	30	0.45	3	2	3	7	0	Ub;Ac;pS_pT	0.333333	5	2	3	0	12	APAPKFSPVTPKFTPVASKFSPGAPGGSGS	APAPK.FS.PVT.PK.FT.PVAS.K.FS.PGAPGGS.GS.	1	0	0	0	0	1	1
ACTA1	58	377	1	51	80	30	0.45	4	3	3	3	2	Ub;Ac;pS_pT;pY	0.3	2	2	3	2	11	QKDSYVGDEAQSKRGILTLKYPIEHGIITN	QK.DS.Y.VGDEAQS.K.RGILTLK.Y.PIEHGIIT.N	0	0	0	0	0	0	1
ACTA2	59	377	1	51	80	30	0.45	4	3	3	3	2	Ub;Ac;pS_pT;pY	0.3	2	2	3	2	11	QKDSYVGDEAQSKRGILTLKYPIEHGIITN	QK.DS.Y.VGDEAQS.K.RGILTLK.Y.PIEHGIIT.N	0	0	0	0	0	0	1
ACTB	60	375	1	191	210	20	0.35	4	1	1	4	1	Ub;Ac;pS_pT;pY	0.35	1	4	1	1	7	KILTERGYSFTTTAEREIVR	K.ILTERGY.S.FT.T.T.AEREIVR	0	0	0	0	0	0	1
ACTC1	70	377	1	51	80	30	0.45	4	3	3	3	2	Ub;Ac;pS_pT;pY	0.3	2	2	3	2	11	QKDSYVGDEAQSKRGILTLKYPIEHGIITN	QK.DS.Y.VGDEAQS.K.RGILTLK.Y.PIEHGIIT.N	0	0	0	0	0	0	0
ACTG2	72	376	1	51	80	30	0.5	4	3	3	3	2	Ub;Ac;pS_pT;pY	0.3	2	2	3	2	11	KDSYVGDEAQSKRGILTLKYPIEHGIITNW	K.DS.Y.VGDEAQS.K.RGILTLK.Y.PIEHGIIT.NW	0	0	0	0	0	0	1
CAPN1	823	714	1	71	90	20	0.35	4	3	1	2	1	Ub;Ac;pS_pT;pY	0.45	2	2	4	1	7	KDLGPNSSKTYGIKWKRPTE	K.DLGPNSS.K.T.Y.GIK.WKRPTE	0	0	0	0	0	0	1
CDK1	983	297	1	1	20	20	0.4	4	2	1	2	3	Ub;Ac;pS_pT;pY	0.4	0	2	3	3	8	MEDYTKIEKIGEGTYGVVYK	MEDY.T.K.IEK.IGEGT.Y.GVVY.K.	0	0	0	0	0	0	1
CFL1	1072	166	2	81	100	20	0.4	4	2	2	1	3	Ub;Ac;pS_pT;pY	0.45	1	2	3	3	8	RYALYDATYETKESKKEDLV	RY.ALY.DAT.Y.ETK.ESKK.EDLV	0	0	0	0	0	0	0
CFL2	1073	166	1	81	100	20	0.4	4	2	2	1	3	Ub;Ac;pS_pT;pY	0.45	1	2	3	3	8	RYALYDATYETKESKKEDLV	RY.ALY.DAT.Y.ETK.ESKK.EDLV	0	0	0	0	0	0	0
CSNK2B	1460	215	1	196	215	20	0.35	4	2	1	3	1	Ub;Ac;pS_pT;pY	0.3	2	1	2	1	7	AYQLQLQAASNFKSPVKTIR	AY.QLQLQAAS.NFK.S.PVK.T.IR	1	0	0	0	0	0	0
EEF1A1	1915	462	1	161	180	20	0.4	4	4	2	1	1	Ub;Ac;pS_pT;pY	0.5	2	1	4	3	8	PYSQKRYEEIVKEVSTYIKK	PY.S.QK.RYEEIVK.EVSTYIK.K.	0	0	0	0	0	0	1
ENO1	2023	434	1	51	100	50	0.45	4	8	7	3	1	Ub;Ac;pS_pT;pY	0.3	2	4	8	1	19	DNDKTRYMGKGVSKAVEHINKTIAPALVSKKLNVTEQEKIDKLMIEMDGT	DNDK.TRY.MGK.GVS.K.AVEHINK.T.IAPALVSK.K.LNVTEQEK.IDK.LMIEMDGT.	0	0	0	0	0	0	0
ENO1	2023	434	3	221	240	20	0.45	4	3	4	1	1	Ub;Ac;pS_pT;pY	0.35	0	2	4	1	9	KEGLELLKTAIGKAGYTDKV	K.EGLELLK.TAIGK.AGY.T.DK.V	0	0	0	0	0	0	0
HIST1H1E	3008	219	1	51	80	30	0.35	3	4	4	1	1	Ub;Ac;pS_pT;pY	0.3	4	0	4	1	10	SKERSGVSLAALKKALAAAGYDVEKNNSRI	SK.ERS.GVSLAALK.K.ALAAAGY.DVEK.NNSRI	0	0	0	0	0	0	1
HIST1H2BB	3018	126	2	41	60	20	0.35	4	2	1	2	2	Ub;Ac;pS_pT;pY	0.4	2	1	3	2	7	YVYKVLKQVHPDTGISSKAM	Y.VY.KVLK.QVHPDT.GIS.SK.AM	0	0	0	0	0	0	1
HSP90AA1	3320	854	1	401	420	20	0.4	4	3	3	1	1	Ub;Ac;pS_pT;pY	0.4	0	2	5	1	8	KIKEKYIDQEELNKTKPIWT	KIKEK.Y.IDQEELNK.T.K.PIWT	0	0	0	0	0	0	1
HSP90AA1	3320	854	2	431	450	20	0.35	4	2	2	2	1	Ub;Ac;pS_pT;pY	0.3	1	1	2	2	7	YGEFYKSLTNDWEDHLAVKH	YGEFY.K.S.LT.NDWEDHLAVK.H	0	0	0	0	0	0	1
HSP90AB1	3326	724	1	271	320	50	0.35	4	5	3	4	3	Ub;Ac;pS_pT;pY	0.3	1	4	7	3	15	KIKEKYIDQEELNKTKPIWTRNPDDITQEEYGEFYKSLTNDWEDHLAVKH	KIKEK.Y.IDQEELNK.T.K.PIWTRNPDDIT.QEEY.GEFY.K.S.LT.NDWEDHLAVK.H	0	0	0	0	0	0	1
HSPA8	3312	646	1	101	130	30	0.4	4	4	2	3	2	Ub;Ac;pS_pT;pY	0.4	3	2	5	2	11	PKVQVEYKGETKSFYPEEVSSMVLTKMKEI	PKVQVEY.K.GETK.S.FY.PEEVS.S.MVLTK.MK.EI	0	0	0	0	0	0	1
KRT8	3856	483	1	11	50	40	0.55	4	1	1	14	1	Ub;Ac;pS_pT;pY	0.45	14	2	1	1	17	KVSTSGPRAFSSRSYTSGPGSRISSSSFSRVGSSNFRGGL	K.VS.T.SGPRAFS.S.RS.Y.T.S.GPGSRIS.S.S.S.FS.RVGS.S.NFRGGL	0	0	0	1	1	0	1
NCL	4691	710	1	391	410	20	0.35	4	3	2	1	1	Ub;Ac;pS_pT;pY	0.3	0	2	3	1	7	DARTLLAKNLPYKVTQDELK	DARTLLAK.NLPY.K.VT.QDELK.	0	0	0	0	0	0	1
RPL6	6128	288	1	201	220	20	0.35	4	3	2	1	1	Ub;Ac;pS_pT;pY	0.4	1	1	5	1	7	IDISNVKIPKHLTDAYFKKK	IDIS.NVK.IPK.HLTDAY.FK.KK	0	0	0	0	0	0	1
RPS13	6207	151	1	21	40	20	0.35	4	2	2	2	1	Ub;Ac;pS_pT;pY	0.4	2	2	3	1	7	SVPTWLKLTSDDVKEQIYKL	SVPTWLK.LT.S.DDVK.EQIY.K.L	0	0	0	0	0	0	1
RPS2	6187	293	1	261	280	20	0.35	4	2	2	2	1	Ub;Ac;pS_pT;pY	0.4	1	4	2	1	7	FTKSPYQEFTDHLVKTHTRV	FTK.S.PY.QEFTDHLVK.THT.RV	1	0	0	0	0	0	1
SLC1A5	6510	541	1	521	541	21	0.35	4	2	1	3	1	Ub;Ac;pS_pT;pY	0.285714	2	1	2	1	7	LKHYRGPAGDATVASEKESVM	LK.HY.RGPAGDAT.VAS.EK.ES.VM	0	0	0	0	0	0	0
SRSF2	6427	221	1	21	40	20	0.35	4	1	1	4	1	Ub;Ac;pS_pT;pY	0.35	1	3	1	2	7	LTYRTSPDTLRRVFEKYGRV	LT.Y.RT.S.PDT.LRRVFEK.YGRV	1	0	1	0	0	1	1
EZR	7430	586	1	251	270	20	0.35	3	3	3	0	1	Ub;Ac;pY	0.3	0	0	5	1	7	NDKKFVIKPIDKKAPDFVFY	NDK.KFVIK.PIDK.K.APDFVFY.	0	0	0	0	0	0	1
MSN	4478	577	1	251	270	20	0.35	3	3	3	0	1	Ub;Ac;pY	0.3	0	0	5	1	7	NDKKFVIKPIDKKAPDFVFY	NDK.KFVIK.PIDK.K.APDFVFY.	0	0	0	0	0	0	0
RDX	5962	583	1	251	270	20	0.35	3	3	3	0	1	Ub;Ac;pY	0.3	0	0	5	1	7	NDKKFVIKPIDKKAPDFVFY	NDK.KFVIK.PIDK.K.APDFVFY.	0	0	0	0	0	0	0
RPS11	6205	158	1	31	50	20	0.35	3	3	2	0	2	Ub;Ac;pY	0.35	0	1	4	2	7	EKLPRYYKNIGLGFKTPKEA	EKLPRY.Y.K.NIGLGFK.TPK.EA	1	0	0	0	0	0	1
AHNAK	79026	5890	1	5721	5750	30	0.45	2	3	0	8	0	Ub;pS_pT	0.466667	7	1	6	0	11	KPKGKGGVTGSPEASISGSKGDLKSSKASL	KPKGK.GGVT.GS.PEAS.IS.GS.K.GDLKS.S.K.AS.L	1	0	0	0	0	1	0
AKAP12	9590	1782	1	271	300	30	0.35	2	3	0	6	0	Ub;pS_pT	0.5	6	4	5	0	9	EKQEKEPSKSAESPTSPVTSETGSTFKKFF	EKQEKEPSK.S.AES.PT.S.PVT.S.ETGSTFK.K.FF	1	0	0	0	0	1	0
AKAP12	9590	1782	2	631	660	30	0.4	2	1	0	8	0	Ub;pS_pT	0.433333	6	3	4	0	9	KEDELDKVKSATLSSTESTASEMQEEMKGS	KEDELDKVK.S.AT.LS.S.T.ES.T.AS.EMQEEMKGS	0	0	0	0	0	0	0
ATRX	546	2492	2	1981	2000	20	0.4	2	2	0	6	0	Ub;pS_pT	0.45	6	1	2	0	8	LKLEESKATSSSNPSSPAPD	LK.LEESK.AT.S.S.S.NPS.S.PAPD	1	0	0	0	0	1	0
CBX3	11335	183	1	91	110	20	0.35	2	2	0	5	0	Ub;pS_pT	0.55	6	0	5	0	7	RKSLSDSESDDSKSKKKRDA	RK.S.LS.DS.ES.DDS.K.SKKKRDA	0	0	0	0	0	0	1
CDC27	996	830	1	431	450	20	0.4	2	2	0	6	0	Ub;pS_pT	0.45	5	2	2	0	8	DSLEITKLDSSIISEGKIST	DS.LEIT.K.LDS.S.IIS.EGK.IST.	0	0	0	0	0	0	1
CUL4B	8450	913	1	41	60	20	0.4	2	1	0	7	0	Ub;pS_pT	0.5	2	5	3	0	8	ATDGNTSTTPPTSAKKRKLN	AT.DGNT.S.T.T.PPT.S.AKKRK.LN	1	0	0	0	0	1	0
CUL4B	8450	913	2	131	160	30	0.45	2	1	0	9	0	Ub;pS_pT	0.5	10	2	3	0	10	DAKMAEESSSSSSSSSPTAATSQQQQLKNK	DAKMAEES.SSS.S.S.S.S.S.PT.AATS.QQQQLK.NK	1	0	0	0	0	1	0
CXCR4	7852	356	1	321	356	36	0.4	2	1	0	14	0	Ub;pS_pT	0.527778	14	2	3	0	15	LTSVSRGSSLKILSKGKRGGHSSVSTESESSSFHSS	LT.S.VS.RGS.S.LK.ILS.KGKRGGHS.S.VS.TESES.S.S.FHS.S.	0	0	0	0	1	0	0
FAM175A	84142	409	1	381	400	20	0.35	2	3	0	4	0	Ub;pS_pT	0.4	3	1	4	0	7	KASKMSSPETDEEIEKMKGF	KAS.K.MS.S.PET.DEEIEK.MK.GF	1	0	0	0	0	1	1
HN1	51155	181	1	61	80	20	0.35	2	2	0	5	0	Ub;pS_pT	0.4	6	0	2	0	7	SWAKSAGAKSSGGREDLESS	S.WAK.SAGAK.S.S.GGREDLES.S.	0	0	0	0	0	0	0
HNRNPC	3183	306	1	221	250	30	0.4	2	5	0	5	0	Ub;pS_pT	0.433333	6	1	6	0	10	QSKQAVEMKNDKSEEEQSSSSVKKDETNVK	QSK.QAVEMK.NDK.S.EEEQS.S.S.S.VK.K.DETNVK	0	0	0	0	0	0	1
MARCKSL1	65108	195	1	101	120	20	0.4	2	2	0	6	0	Ub;pS_pT	0.4	6	0	2	0	8	SGLSFKRNRKEGGGDSSASS	S.GLS.FK.RNRK.EGGGDS.S.AS.S.	0	0	0	0	0	0	0
MPZL1	9019	269	1	201	220	20	0.35	2	1	0	6	0	Ub;pS_pT	0.45	5	2	2	0	7	TGCSTSESLSPVKQAPRKSP	TGCS.T.S.ES.LS.PVK.QAPRKS.P	1	0	1	0	0	1	0
NUP133	55746	1156	1	31	50	20	0.35	2	1	0	6	0	Ub;pS_pT	0.35	5	1	1	0	7	TASRKGLPLGSAVSSPVLFS	T.AS.RK.GLPLGS.AVS.S.PVLFS.	1	0	0	0	0	1	1
NUP88	4927	741	1	31	50	20	0.35	2	1	0	6	0	Ub;pS_pT	0.45	6	1	2	0	7	LKNQSPTEAEKPASSSLPSS	LKNQS.PT.EAEK.PASS.S.LPS.S.	1	0	0	0	0	1	1
PCM1	5108	2024	1	1181	1200	20	0.35	3	4	0	3	0	Ub;pS_pT	0.4	4	0	4	0	7	KPFESSSSIGAEKPRNKKLP	K.PFES.SS.S.IGAEK.PRNK.K.LP	0	0	0	0	0	0	1
POLA2	23649	598	1	141	160	20	0.4	2	1	0	7	0	Ub;pS_pT	0.45	7	1	1	0	8	SPHQLLSPSSFSPSATPSQK	S.PHQLLS.PS.S.FS.PS.AT.PSQK.	1	0	0	0	0	1	1
PRKAA1	5562	574	1	491	510	20	0.35	2	1	0	6	0	Ub;pS_pT	0.35	3	3	1	0	7	SIDDEITEAKSGTATPQRSG	S.IDDEIT.EAK.S.GT.AT.PQRS.G	1	0	0	0	0	1	0
RACGAP1	29127	632	1	581	610	30	0.4	2	1	0	10	0	Ub;pS_pT	0.4	6	4	2	0	11	PEHQLLKTPSSSSLSQRVRSTLTKNTPRFG	PEHQLLK.T.PS.S.S.S.LS.QRVRS.T.LT.KNT.PRFG	1	0	0	0	0	1	1
RAD18	56852	495	1	101	120	20	0.35	2	3	0	4	0	Ub;pS_pT	0.5	5	1	3	1	7	AKSPASSSSKNLAVKVYTPV	AK.S.PAS.S.SSK.NLAVK.VYT.PV	1	0	0	0	0	1	0
RAD23A	5886	363	1	121	140	20	0.35	2	1	0	6	0	Ub;pS_pT	0.5	7	2	1	0	7	DKSPSEESAPTTSPESVSGS	DK.S.PS.EES.APTT.S.PESVS.GS	1	0	0	0	0	1	0
SF3B2	10992	895	1	341	360	20	0.35	2	1	0	6	0	Ub;pS_pT	0.45	7	1	1	0	7	GVSSESSGDREKDSTRSRGS	GVS.S.ES.S.GDREK.DSTRS.RGS.	0	0	0	0	0	0	1
SPECC1L	23384	1117	1	831	850	20	0.35	2	2	0	5	0	Ub;pS_pT	0.6	6	4	2	0	7	SSTSSEPTPTVKTLIKSFDS	S.S.T.S.S.EPTPTVK.TLIK.SFDS	1	0	0	0	0	1	0
SPTBN1	6711	2364	1	2151	2180	30	0.35	2	1	0	9	0	Ub;pS_pT	0.433333	6	4	3	0	10	VNGATEQRTSSKESSPIPSPTSDRKAKTAL	VNGAT.EQRT.S.S.KES.S.PIPS.PT.S.DRKAK.TAL	1	0	0	0	1	1	1
SPTBN1	6711	2364	2	2331	2350	20	0.35	2	1	0	6	0	Ub;pS_pT	0.5	4	3	3	0	7	TSVVTITSESSPGKREKDKE	T.SVVT.IT.S.ES.S.PGK.REKDKE	1	0	0	0	0	1	1
SQSTM1	8878	440	1	261	300	40	0.55	2	3	0	14	0	Ub;pS_pT	0.425	12	2	3	0	17	HGGKRSRLTPVSPESSSTEEKSSSQPSSCCSDPSKPGGNV	HGGK.RS.RLT.PVS.PES.S.S.T.EEK.S.S.S.QPS.S.CCS.DPS.K.PGGNV	1	0	0	1	0	1	1
TMEM48	55706	674	1	431	450	20	0.35	2	1	0	6	0	Ub;pS_pT	0.45	5	3	1	0	7	TSLFSSKLSTPDVVSPFGTP	TS.LFSS.K.LS.T.PDVVS.PFGT.P	1	0	0	0	0	1	0
VAPB	9217	243	1	141	160	20	0.45	2	2	0	7	0	Ub;pS_pT	0.65	7	4	2	0	9	ISTTASKTETPIVSKSLSSS	ISTTAS.K.TET.PIVS.K.S.LS.S.S.	1	0	0	0	0	1	0
WAC	51322	647	1	451	470	20	0.35	2	1	0	6	0	Ub;pS_pT	0.35	3	3	1	0	7	VSPRISTPQTNTVPIKPLIS	VS.PRIS.T.PQT.NT.VPIK.PLIS.	1	0	0	0	0	1	0
ZC3HC1	51530	502	3	471	490	20	0.4	2	1	0	7	0	Ub;pS_pT	0.45	6	1	2	0	8	SSQPAETDSMSLSEKSRKVF	S.S.QPAET.DS.MS.LS.EK.S.RKVF	0	0	0	0	0	0	0
ABCC1	4363	1531	1	901	930	30	0.4	3	1	0	7	1	Ub;pS_pT;pY	0.4	9	1	1	1	9	LVTDSAGKQLQRQLSSSSSYSGDISRHHNS	LVTDS.AGK.QLQRQLS.S.S.S.S.Y.SGDISRHHNS.	0	0	0	1	0	0	0
ANXA1	301	346	1	21	40	20	0.45	3	2	0	5	2	Ub;pS_pT;pY	0.45	4	1	2	2	9	YVQTVKSSKGGPGSAVSPYP	Y.VQT.VK.S.S.K.GGPGS.AVS.PY.P	1	0	0	0	0	1	0
ANXA2	302	357	1	31	50	20	0.35	3	1	0	4	2	Ub;pS_pT;pY	0.4	3	2	1	2	7	LEGDHSTPPSAYGSVKAYTN	LEGDHS.T.PPS.AY.GS.VK.AY.TN	1	0	0	0	0	1	0
BAIAP2	10458	552	1	321	350	30	0.35	3	1	0	7	1	Ub;pS_pT;pY	0.5	8	2	4	1	9	PKSLSPPQSQSKLSDSYSNTLPVRKSVTPK	PKS.LS.PPQSQSK.LSDS.Y.S.NT.LPVRKS.VT.PK	1	0	0	0	0	1	0
CLINT1	9685	625	1	291	310	20	0.35	3	1	0	5	1	Ub;pS_pT;pY	0.35	2	3	1	1	7	AHYTGDKASPDQNASTHTPQ	AHY.T.GDK.AS.PDQNAS.T.HT.PQ	1	0	0	0	0	1	0
DDX3X	1654	662	1	51	90	40	0.45	3	1	0	11	2	Ub;pS_pT;pY	0.5	14	0	4	2	14	GFYDKDSSGWSSSKDKDAYSSFGSRSDSRGKSSFFSDRGS	GFY.DK.DSSGWS.S.S.KDKDAY.S.S.FGS.RS.DS.RGKS.SFFS.DRGS.	0	0	0	0	1	0	1
DNTTIP2	30836	756	1	121	150	30	0.4	3	1	0	8	1	Ub;pS_pT;pY	0.433333	5	3	4	1	10	SVRKKPKVTPTKESYTEEIVSEAESHVSGI	S.VRKKPKVT.PT.K.ES.Y.T.EEIVS.EAES.HVS.GI	1	0	0	0	0	1	0
DOCK6	57572	2047	1	871	890	20	0.4	3	1	0	6	1	Ub;pS_pT;pY	0.4	6	0	1	1	8	ASLYLARSKSISSSNPDLAV	AS.LY.LARS.K.S.IS.S.S.NPDLAV	0	0	0	0	0	0	0
EEF2K	29904	725	1	61	80	20	0.35	3	1	0	5	1	Ub;pS_pT;pY	0.5	7	1	1	1	7	SNLTKSERYSSSGSPANSFH	SNLTK.SERY.S.S.S.GS.PANS.FH	1	0	0	0	0	1	0
EGFR	1956	1210	1	711	730	20	0.35	3	4	0	2	1	Ub;pS_pT;pY	0.35	1	1	4	1	7	EFKKIKVLGSGAFGTVYKGL	EFK.K.IK.VLGS.GAFGT.VY.K.GL	0	0	0	0	0	0	1
EMD	2010	254	2	81	100	20	0.35	3	1	0	1	5	Ub;pS_pT;pY	0.4	2	0	1	5	7	DALLYQSKGYNDDYYEESYF	DALLY.QS.K.GY.NDDY.Y.EESY.F	0	0	0	0	0	0	1
EPHA2	1969	976	1	571	590	20	0.35	3	3	0	2	2	Ub;pS_pT;pY	0.4	2	1	3	2	7	PEDVYFSKSEQLKPLKTYVD	PEDVY.FSK.S.EQLK.PLK.T.Y.VD	0	0	0	0	0	0	0
F11R	50848	299	1	271	290	20	0.35	3	1	0	5	1	Ub;pS_pT;pY	0.5	5	1	3	1	7	KGTSSKKVIYSQPSARSEGE	KGT.SS.KK.VIY.S.QPS.ARS.EGE	0	0	0	0	0	0	0
MAP1B	4131	2468	4	1901	1940	40	0.5	3	2	0	9	7	Ub;pS_pT;pY	0.55	5	6	4	7	18	VGGYYYEKIERTTKSPSDSGYSYETIGKTTKTPEDGDYSY	VGGY.Y.Y.EK.IERT.T.KS.PS.DS.GY.S.Y.ETIGK.TT.KT.PEDGDY.S.Y.	1	0	0	0	0	1	1
MAP1B	4131	2468	5	1961	1980	20	0.4	3	1	0	5	2	Ub;pS_pT;pY	0.55	4	3	2	2	8	EKTTSPPEVSGYSYEKTERS	EKT.T.S.PPEVS.GY.S.Y.EK.TERS	1	0	0	0	0	1	1
PCBP2	5094	366	1	171	190	20	0.35	3	1	0	5	1	Ub;pS_pT;pY	0.45	5	1	2	1	7	SQSPPKGVTIPYRPKPSSSP	SQS.PPKGVT.IPY.RPK.PS.S.S.P	1	0	0	0	0	1	1
PIK3R4	30849	1358	1	1281	1300	20	0.35	3	1	0	4	2	Ub;pS_pT;pY	0.5	5	2	1	2	7	GSTSSPSVSYYRKIIEGTEV	GS.T.SSPS.VS.Y.Y.RK.IIEGTEV	1	0	0	0	0	1	0
PLEC	5339	4684	2	4601	4630	30	0.6	3	1	0	9	3	Ub;pS_pT;pY	0.5	8	3	1	3	13	LEAAAQSTKGYYSPYSVSGSGSTAGSRTGS	LEAAAQSTK.GY.Y.S.PY.S.VS.GS.GS.T.AGS.RT.GS.	1	0	0	0	0	1	1
PTRF	284119	390	1	151	180	30	0.4	3	5	0	4	1	Ub;pS_pT;pY	0.333333	4	0	5	1	10	FKVMIYQDEVKLPAKLSISKSLKESEALPE	FK.VMIY.QDEVK.LPAK.LS.IS.K.S.LK.ES.EALPE	0	0	0	0	0	0	0
RANBP10	57610	620	1	351	370	20	0.45	3	1	0	7	1	Ub;pS_pT;pY	0.5	8	0	1	1	9	LSSRSPKSQDSYPGSPSLSP	LS.SRS.PK.S.QDS.Y.PGS.PS.LS.P	1	0	0	0	0	1	0
RBMX	27316	391	1	201	220	20	0.35	3	1	0	3	3	Ub;pS_pT;pY	0.45	4	1	1	3	7	SRRDVYLSPRDDGYSTKDSY	SRRDVY.LS.PRDDGY.S.T.K.DSY.	1	0	0	0	0	0	1
SCAMP3	10067	347	1	71	90	20	0.35	3	2	0	3	2	Ub;pS_pT;pY	0.5	4	2	2	2	7	PSRKLSPTEPKNYGSYSTQA	PSRK.LS.PTEPK.NY.GS.Y.ST.QA	1	0	1	0	0	0	0
SERBP1	26135	408	1	231	250	20	0.35	3	1	0	3	3	Ub;pS_pT;pY	0.45	3	1	2	3	7	LTESPKYIQKQISYNYSDLD	LT.ES.PK.Y.IQKQISY.NY.S.DLD	1	0	0	0	0	0	0
SHCBP1	79801	672	1	41	60	20	0.35	3	1	0	5	1	Ub;pS_pT;pY	0.4	6	0	1	1	7	DSCSDCSYRDKPGSSLQSFM	DS.CS.DCS.Y.RDK.PGS.S.LQSFM	0	0	0	0	0	0	1
SLC38A2	54407	506	1	1	40	40	0.5	3	3	0	8	3	Ub;pS_pT;pY	0.45	10	1	4	3	14	MKKAEMGRFSISPDEDSSSYSSNSDFNYSYPTKQAALKSH	MKK.AEMGRFS.IS.PDEDS.S.S.Y.S.S.NS.DFNY.SY.PTK.QAALK.SH	1	0	0	0	0	1	0
SUGT1	10910	365	1	271	290	20	0.35	3	1	0	4	2	Ub;pS_pT;pY	0.4	3	1	2	2	7	ADVKNLYPSSSPYTRNWDKL	ADVK.NLY.PS.S.S.PY.T.RNWDKL	1	0	0	0	0	1	0
TP53BP1	7158	1977	1	521	540	20	0.4	3	1	0	6	1	Ub;pS_pT;pY	0.5	7	1	1	1	8	MLSTSEYSQSPKMESLSSHR	MLST.S.EY.S.QS.PK.MES.LSS.HR	1	0	0	0	0	1	1
TRA2A	29896	282	2	191	210	20	0.35	3	1	0	4	2	Ub;pS_pT;pY	0.35	1	3	1	2	7	RVDYSITKRAHTPTPGIYMG	RVDY.S.IT.K.RAHT.PT.PGIY.MG	1	0	0	0	0	1	0
VCPIP1	80124	1222	1	751	780	30	0.4	3	1	0	7	1	Ub;pS_pT;pY	0.466667	4	5	4	1	9	IRDGPSSAPATPTKAPYSPTTSKEKKIRIT	IRDGPS.S.APAT.PT.K.APY.S.PT.T.SKEKKIRIT	1	0	0	0	0	1	0

## Sheet: Associated_SLIMs
Rank	Sig	Pattern	Description
1	4.38e-09	[ST]P..S	Proline-Directed Kinase (e.g. MAPK) phosphorylation site in higher eukaryotes.
2	1.04e-06	[ST]P[ST]	Proline-Directed Kinase (e.g. MAPK) phosphorylation site in higher eukaryotes.
3	2.69e-05	[ST].[ST]P	Proline-Directed Kinase (e.g. MAPK) phosphorylation site in higher eukaryotes.
4	5.53e-05	SPV	Proline-Directed Kinase (e.g. MAPK) phosphorylation site in higher eukaryotes.
5	0.000185	SP..S	Proline-Directed Kinase (e.g. MAPK) phosphorylation site in higher eukaryotes.
6	0.000711	[ST].SP	Proline-Directed Kinase (e.g. MAPK) phosphorylation site in higher eukaryotes.
7	0.002	[GS][ST]P	Proline-Directed Kinase (e.g. MAPK) phosphorylation site in higher eukaryotes.
8	0.003	S.[ST]P	Proline-Directed Kinase (e.g. MAPK) phosphorylation site in higher eukaryotes.
9	0.004	[ST][ST]P	Proline-Directed Kinase (e.g. MAPK) phosphorylation site in higher eukaryotes.
10	0.005	G..SR	Unknown
11	0.007	T.{0,1}SP	Proline-Directed Kinase (e.g. MAPK) phosphorylation site in higher eukaryotes.
12	0.015	TP..S	Proline-Directed Kinase (e.g. MAPK) phosphorylation site in higher eukaryotes.
13	0.015	R.R..S	PKB
14	0.019	P.[ST]P	ERK2
15	0.028	[ST]P[GS]	Proline-Directed Kinase (e.g. MAPK) phosphorylation site in higher eukaryotes.
16	0.045	P.SP	ERK2
17	0.055	S..[ST]P	Proline-Directed Kinase (e.g. MAPK) phosphorylation site in higher eukaryotes.
18	0.067	R.{1,2}SP	Secondary preference for PKA-type AGC kinase phosphorylation.
19	0.071	[ST]SP	Proline-Directed Kinase (e.g. MAPK) phosphorylation site in higher eukaryotes.
20	0.089	[ST]..R..S	Unknown
