# Supplementary material for: Dual Coordination of Post Translational Modifications in Human Protein Networks
Source: PLOS journal article supplement (doi:10.1371/journal.pcbi.1002933), 2013-03-07

**4462 Protein Complexes:  
4143 unique proteins**

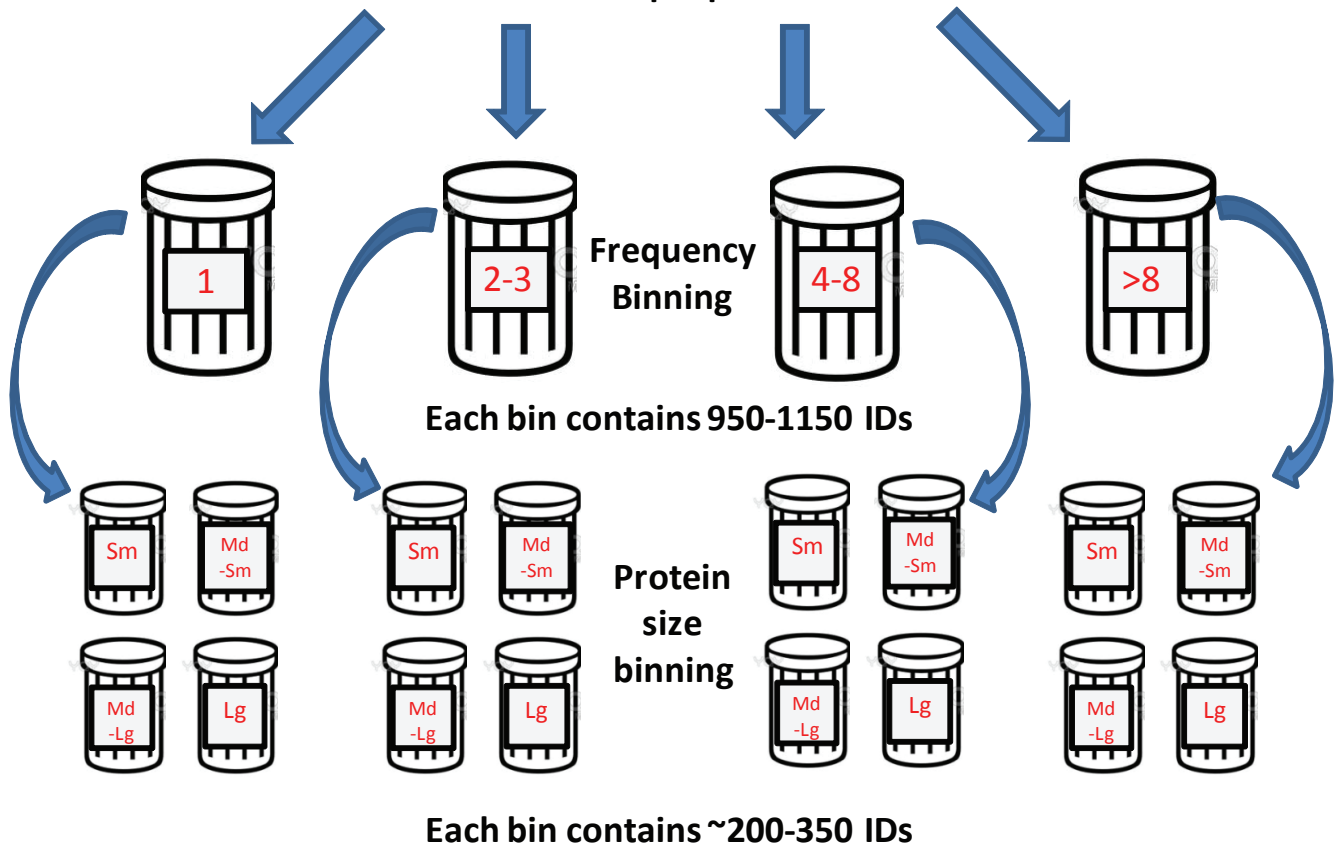

Supplement: S7 (10.1371/journal.pcbi.1002933.s007) [file journal.pcbi.1002933.s007]
