# Supplementary material for: Dual Coordination of Post Translational Modifications in Human Protein Networks
Source: PLOS journal article supplement (doi:10.1371/journal.pcbi.1002933), 2013-03-07

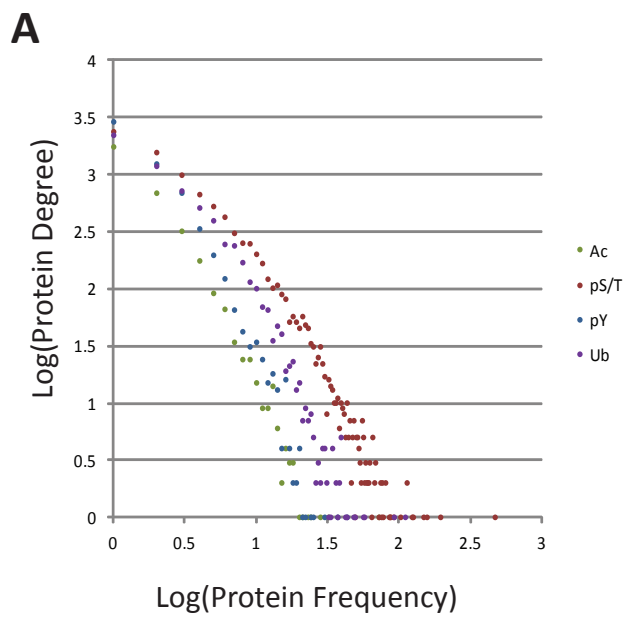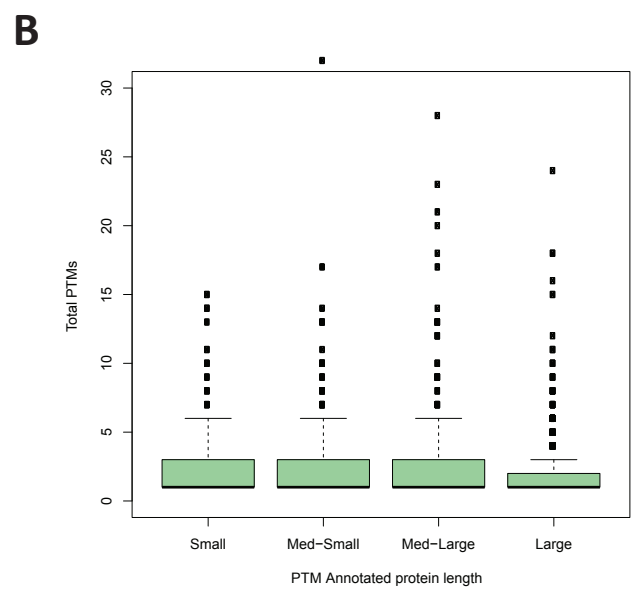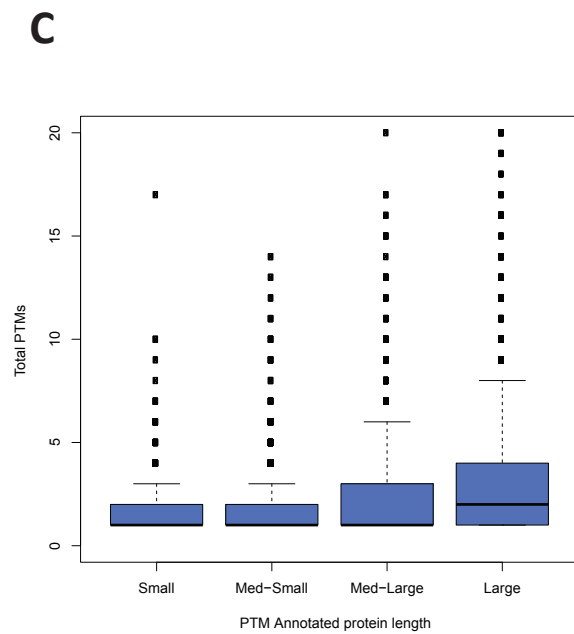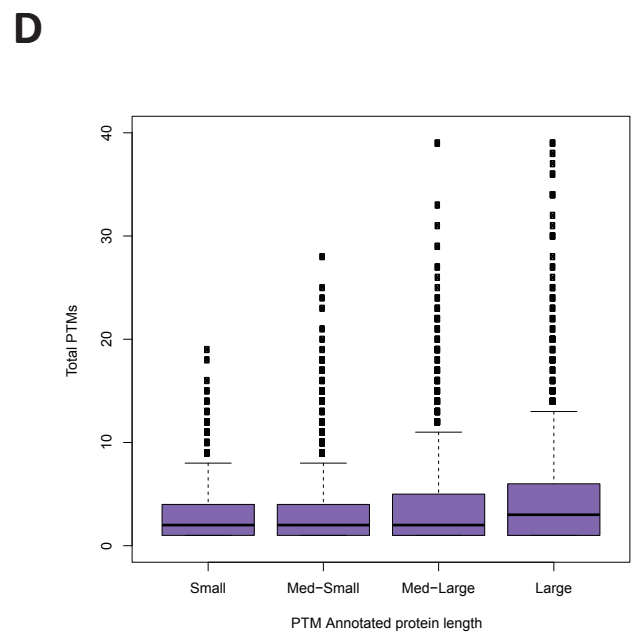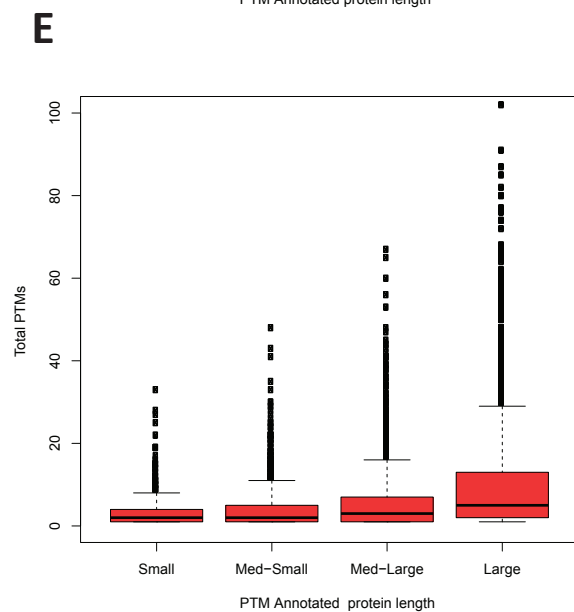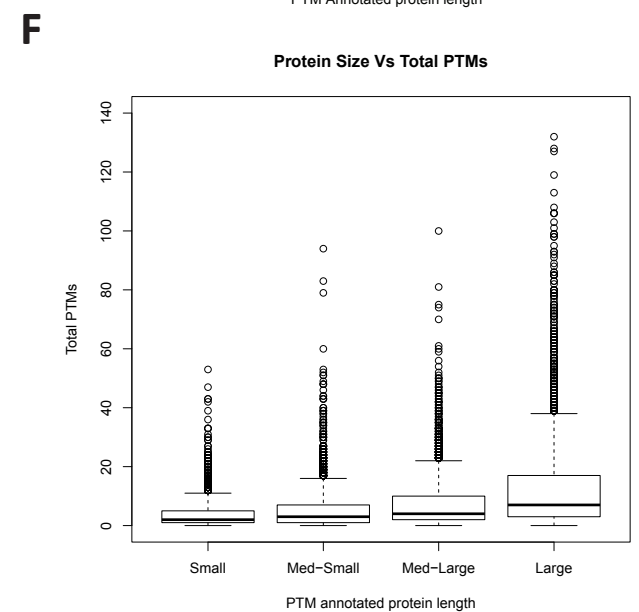

Supplement: S20 (10.1371/journal.pcbi.1002933.s020) [file journal.pcbi.1002933.s020]
